# Supplementary material
Source: PubMed Central journal article supplement (PMC9169970)

# Site-Specific Alkene Hydromethylation via Protonolysis of Titanacyclobutanes

James A. Law, Noah M. Bartfield, and James H. Frederich\*

(corresponding author e-mail: jfrederich@fsu.edu)

## Supporting Information

### Table of Contents

|                                                                       |         |
|-----------------------------------------------------------------------|---------|
| 1. Materials and Methods                                              | S1–S2   |
| 2. Synthesis, Titration, and Handling of Tebbe's Reagent ( <b>1</b> ) | S2–S4   |
| 3. Temperature Profile of Titanacyclobutanes                          | S5–S8   |
| 4. Hydromethylation of fusicoccane substrate <b>2</b>                 | S8      |
| 5. Experimental Procedures and Characterization Data                  | S9–S22  |
| 6. References                                                         | S23–S24 |
| 7. Copies of <sup>1</sup> H and <sup>13</sup> C NMR Spectra           | S25–S98 |

## 1. Materials and Methods

Unless otherwise stated, reactions were conducted in oven-dried glassware (140 °C) under an atmosphere of nitrogen gas (N<sub>2</sub>) using anhydrous solvents. Tetrahydrofuran (THF), methylene chloride (CH<sub>2</sub>Cl<sub>2</sub>), diethyl ether (Et<sub>2</sub>O), and toluene (PhMe) were dried by passage through activated alumina using a solvent purification system. PhMe used for the synthesis of the Tebbe's Reagent (**1**) was degassed by freeze-pump-thaw cycling. Bis(cyclopentadienyl)titanium dichloride was purchased from TCI and stored in a nitrogen glovebox. Solutions of AlMe<sub>3</sub> (2.0 M, PhMe) were purchased from Sigma Aldrich and used as received. Starting materials prepared using literature procedures are listed in Figure S1. All other commercial reagents, including **9a**, **9d** and **9e**, were used as received.

One representative reaction and yield of the product is described in detail; isolated yields reported are the average of duplicate reactions, typically within ± 5% of the reported yield. Column chromatography was carried out using silica gel 60 (SiO<sub>2</sub>, 240-400 mesh) as stationary phase. Thin layer chromatography (TLC) was performed using pre-coated, glass-backed plates (SiO<sub>2</sub>, 60 PF254, 0.25 mm) and visualized by exposure to UV light (254 nm) or by anisaldehyde and/or potassium permanganate staining.

<sup>1</sup>H NMR spectra were recorded at 400 MHz, 600 MHz or 700 MHz and are reported relative to deuterated solvent signals. Data for <sup>1</sup>H NMR spectra are reported as follows: chemical shift (ppm), multiplicity, coupling constant (Hz), and integration. Splitting patterns are abbreviated as follows: singlet (s), doublet (d), triplet (t), quartet (q), quintet (quint), multiplet (m), broad (br), apparent (app), and combinations thereof. <sup>13</sup>C NMR spectra were recorded at 100 MHz or 150 MHz. Data for <sup>13</sup>C NMR spectra are reported in order of carbon multiplicity (C = quaternary, CH = methine, CH<sub>2</sub> = methylene, CH<sub>3</sub> = methyl) and chemical shift. Carbon multiplicity was established by DEPT135 and/or HSQC experiments. Reported melting points of solids are uncorrected. IR spectra were recorded on an FT-IR spectrometer and reported in terms of frequency (cm<sup>-1</sup>). Mass spectra were collected on an LCT spectrometer utilizing direct analysis in real time (DART) ionization.

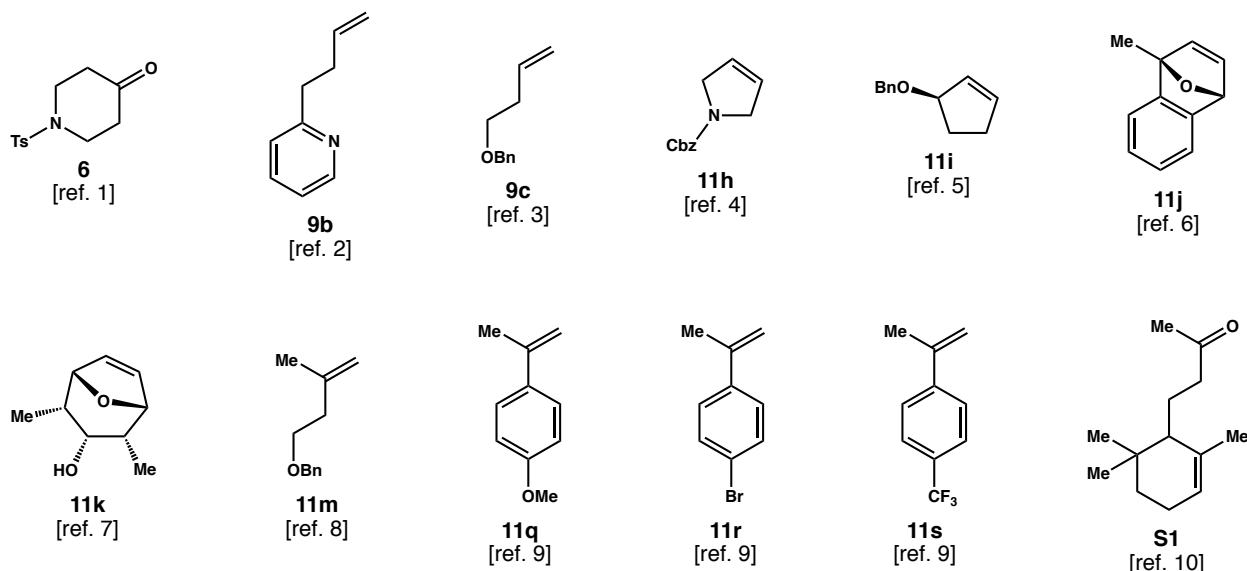

**Figure S1.** Starting materials prepared according to reported literature procedures.

## 2. Synthesis, Titration and Handling of Tebbe's Reagent (1).

**Synthesis of [Cp<sub>2</sub>Ti(μ<sub>2</sub>-Cl)(μ<sub>2</sub>-CH<sub>2</sub>)AlMe<sub>2</sub>] (1).** Following a modification of the procedure reported by Grubbs,<sup>11</sup> a flame-dried Schlenk tube (100 mL) equipped with a Teflon-coated stir bar was pumped into a glovebox. Under inert atmosphere (N<sub>2</sub>), the flask was charged with bis(cyclopentadienyl)titanium dichloride (2.48 g, 10.0 mmol), capped with a yellow polyethylene stopper (Figure S2A), and removed from the glovebox. A 14/20 septa was used to seal the vessel and the flask was purged with a balloon of Ar using a vacuum line (Figure S2B). As shown in Figure S2C and D, the red solid was suspended in degassed PhMe (12 mL), protected from light, and treated with a solution of AlMe<sub>3</sub> (11 mL, 22 mmol) in PhMe (2.0 M) at ambient temperature. The resulting dark red slurry was maintained at ambient temperature for 60 h and then titrated as described below to establish the concentration of **1** (0.37 M, 85% yield). Solutions of **1** prepared in this way could be maintained on the benchtop ~120 h without complication.

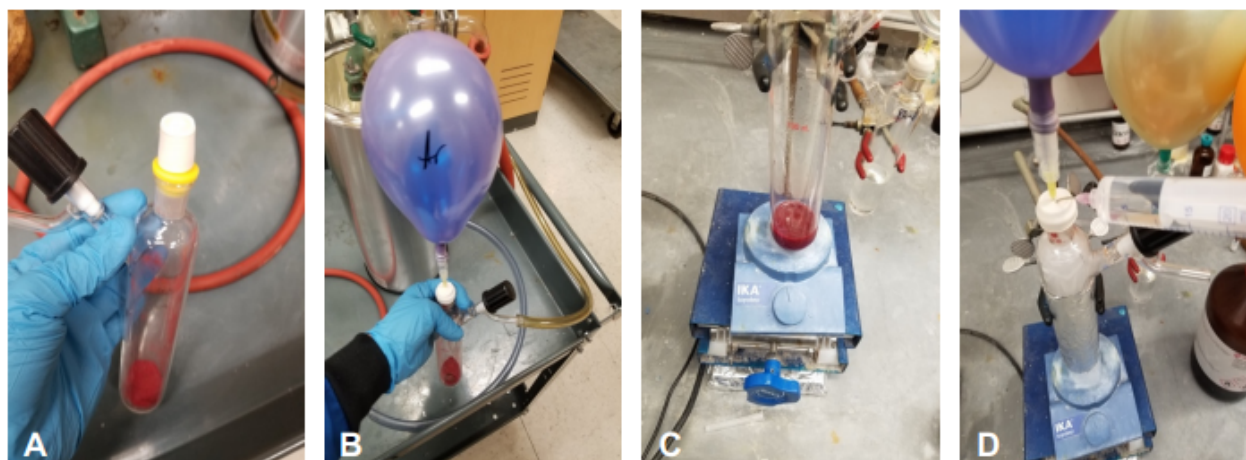

**Figure S2. Tebbe Prep:** (A) Schlenk tube charged with Cp<sub>2</sub>TiCl<sub>2</sub> (red) and sealed with yellow PE cap/septa combination. (B) Solids placed under Ar using a Schlenk/vacuum line. (C) Stirred suspension of Cp<sub>2</sub>TiCl<sub>2</sub>

in degassed PhMe (12 mL). (D) The reaction vessel was protected from light and treated with 2.0 M solution of  $\text{AlMe}_3$  in PhMe (commercial, used as received).

**Titration of 1.** The concentration of the solution of **1** prepared above was established in the following manner: A flame-dried Schlenk tube (25 mL) was charged with freshly distilled *p*-anisaldehyde (136 mg, 1.00 mmol). The reaction vessel was purged with nitrogen using a Schlenk line. The Schlenk tube was placed under a balloon of nitrogen and THF (0.3 mL) was added via syringe. The resulting solution was cooled to  $-40\text{ }^\circ\text{C}$  and maintained for 15 min. An aliquot for the solution of **1** (0.60 mL, 0.260 mmol *theoretically*) was added stream-wise via syringe and the slurry was maintained at  $-40\text{ }^\circ\text{C}$  (Figure S3A). After 15 min, the reaction mixture was treated with 0.1 M aq. NaOH (0.03 mL) at  $-40\text{ }^\circ\text{C}$  and warmed to rt over 30 min. The resulting suspension was filtered over Celite (150 mg) using a pipette (Figure S3B) and concentrated under reduced pressure. The unpurified residue was analyzed by  $^1\text{H}$  NMR ( $\text{CDCl}_3$ , 400 MHz) to determine the ratio of unreacted *p*-anisaldehyde and *p*-methoxystyrene. A representative  $^1\text{H}$  NMR spectra is shown in Figure S3. The ratio of *p*-anisaldehyde (**AA**) to *p*-methoxystyrene (**MS**) (3.44:1, 22% conversion vs. 26% theoretical) was determined by integrating the signals at 7.84 ppm and 7.35 ppm, respectively.

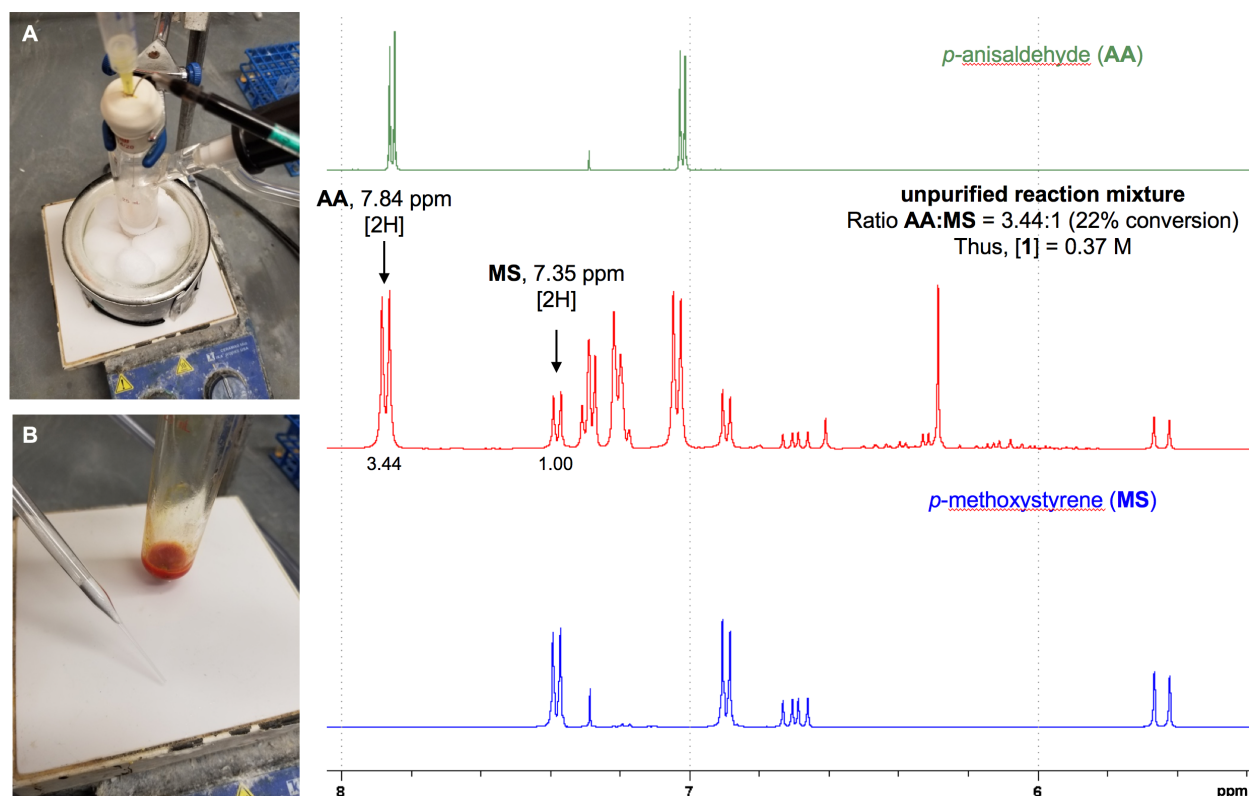

**Figure S3. Titration Protocol:** (A) General reaction setup. (B) Filtration of the unpurified reaction mixture. (C) Representative  $^1\text{H}$  NMR of the unpurified reaction mixture to determine **[1]**.

**Handling solutions of 1.** We observed that solutions of **1** prepared as described above could be maintained under a balloon of argon at ambient temperature for 5–7 days without issue. It was helpful to replace the argon balloon every 48 h to prolong the lifetime of the reagent. As shown in Figure S4, aged solutions of **1** turn noticeably brown. These old solutions contained active reagent (**[1]**  $\sim 0.25\text{ M}$ ), but gave poor results in our hands. The optimal concentration of **1** was 0.4–0.3 M

based on the titration protocol above. **Caution** – solutions of **1** contain residual  $\text{AlMe}_3$  and react vigorously with water.

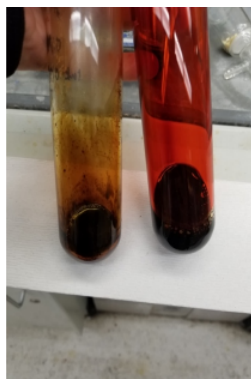

**Figure S4.** Active solution of **1** in PhMe (right) versus an aged solution of **1** in PhMe (left).

**Cost analysis for the synthesis of 1.** Titanocene dichloride ( $\text{Cp}_2\text{TiCl}_2$ , 1271-19-8) was purchased from TCI for \$100 (50 g, 200 mmol). A 2.0 M solution of trimethylaluminum in PhMe was purchased from Sigma Aldrich for \$378 (1 L, 2000 mmol). Based on these prices, the 0.37 M solution prepared above (8.5 mmol, 85% yield) cost \$9.40 in reagents. Therefore, prepared as described here, reagent **1** costs ~\$1.1/mmol. We note that the cost will vary depending on the choice of vendor and quantity of reagents ordered.

### 3. Temperature Profile of Titanacyclobutanes

Detection of transient titanacyclobutane **7** by  $^1\text{H}$  NMR ( $\text{C}_6\text{D}_6$ ).

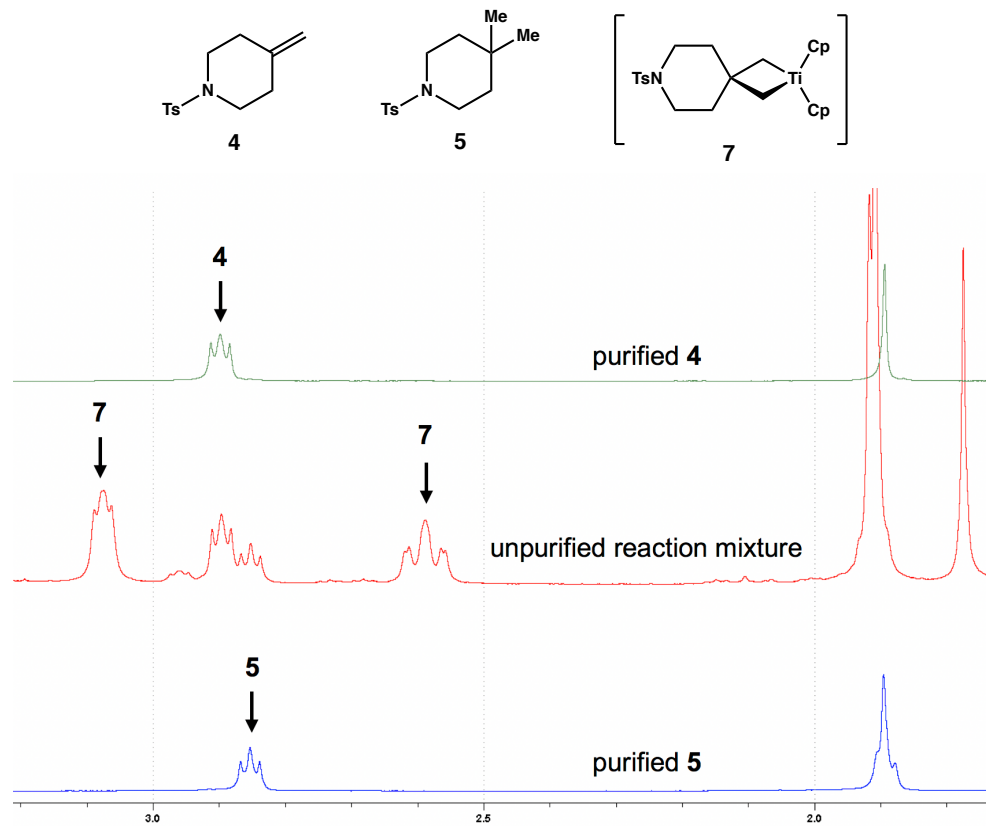

Unpurified reaction mixture in  $\text{C}_6\text{D}_6$  (expanded window)

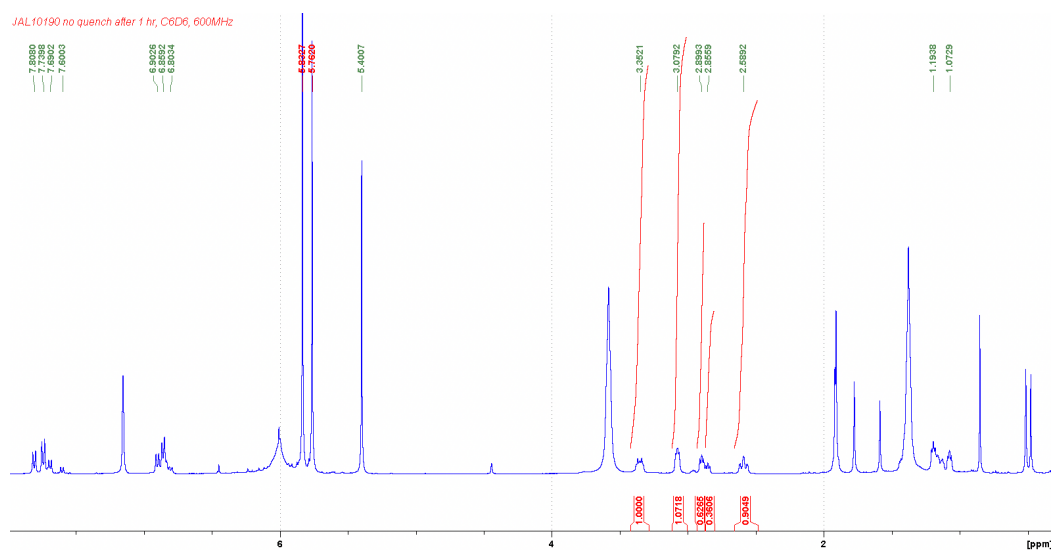

### Thermal stability of titanacyclobutane **7** *in situ*.

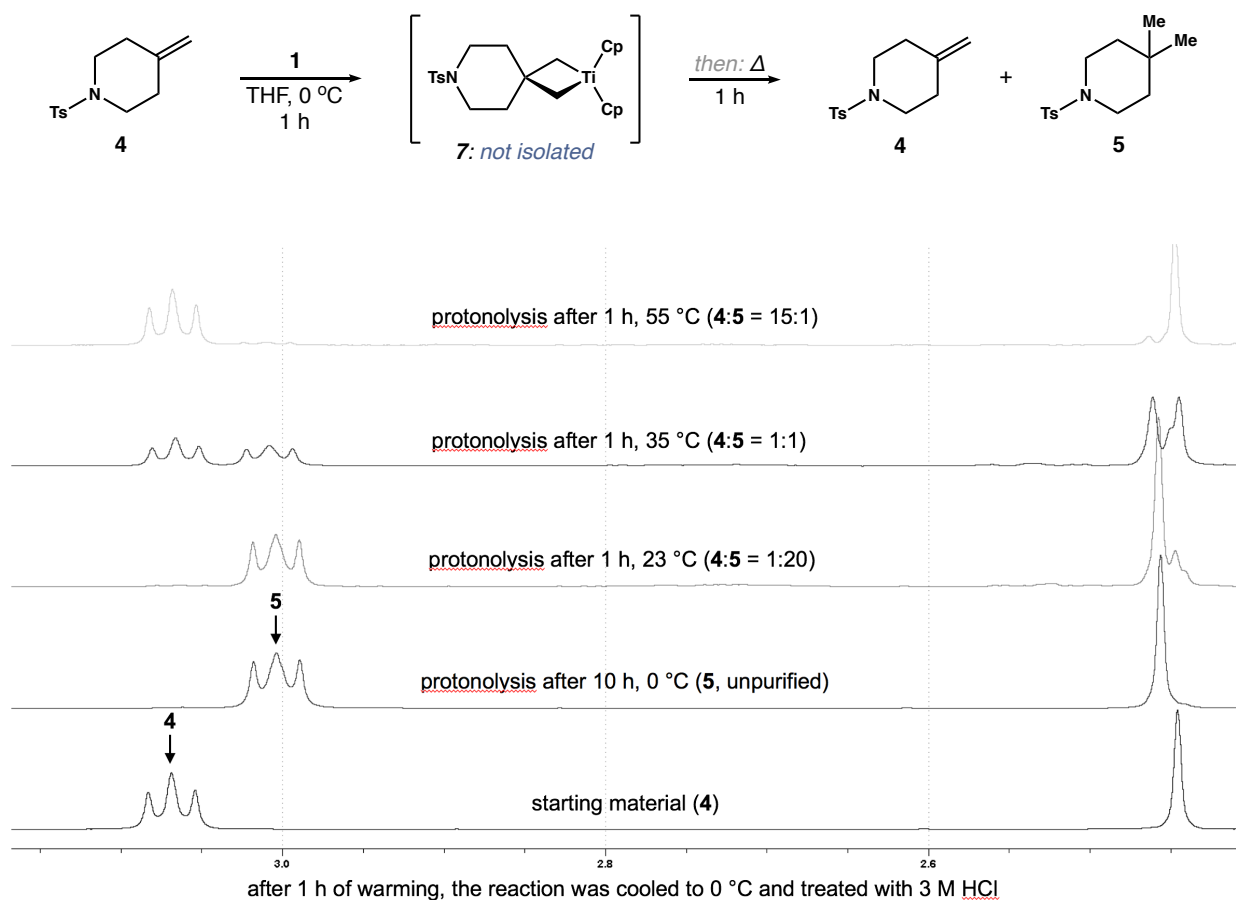

**Figure S5. Supporting data for Scheme 1.** The stability of titanacyclobutane **7** *in situ* at various temperatures was determined by  $^1\text{H}$  NMR spectroscopy. As a representative experiment: **4** was reacted with 1.2 equiv **1** in THF (0.1 M) at 0 °C. After 1 h, the reaction mixture was warmed to rt. After 1 h, the reaction was cooled to 0 °C and treated sequentially with 3 M HCl (2 mL) and EtOAc (2 mL). The resulting slurry was rapidly stirred at 0 °C for 3 h, then warmed to rt and transferred to a separatory funnel with EtOAc (10 mL). The organic layer was washed with saturated aq.  $\text{NaHCO}_3$  (2 x 10 mL) dried over  $\text{MgSO}_4$ , filtered, and concentrated. The unpurified residue was then analyzed by NMR.

### Impact of reaction temperature of conversion and branch/linear (b/l) ratio.

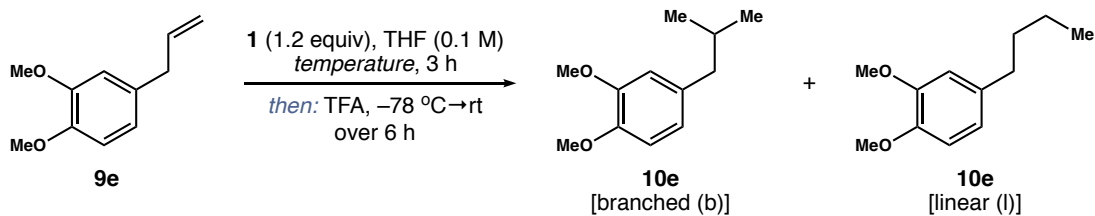

| temperature ( $^\circ\text{C}$ ) | conversion to <b>10e</b> (%) | b/l ratio ( $^1\text{H NMR}$ ) |
|----------------------------------|------------------------------|--------------------------------|
| -40                              | 11                           | --                             |
| -30                              | 44                           | 7.5:1                          |
| -20                              | 59                           | 8:1                            |
| -10                              | 95                           | 8:1                            |
| 0                                | 99                           | >20:1                          |
| 10                               | 99                           | >20:1                          |
| 23                               | 88                           | >20:1                          |
| 30                               | 76                           | >20:1                          |
| 40                               | 46                           | >20:1                          |
| 50                               | 35                           | --                             |

#### a. reaction conversion as a function of temperature ( $^1\text{H NMR}$ spectroscopy, 600 MHz, $\text{CDCl}_3$ )

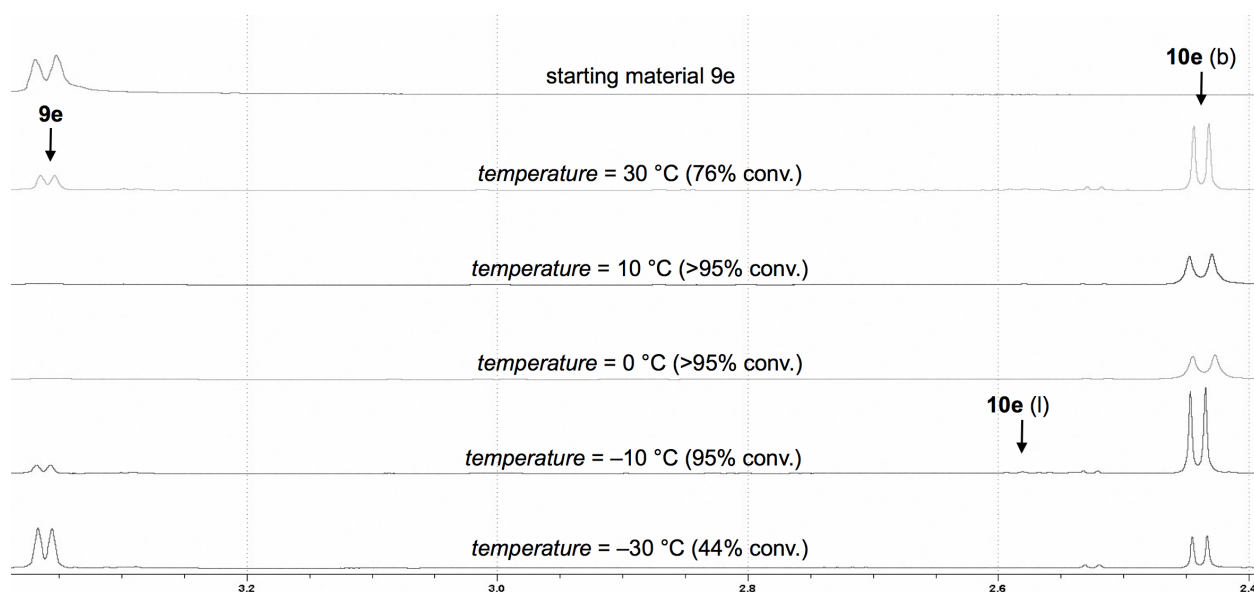

**b. regioselectivity as a function of temperature ( $^1\text{H}$  NMR spectroscopy, 600 MHz,  $\text{CDCl}_3$ )**

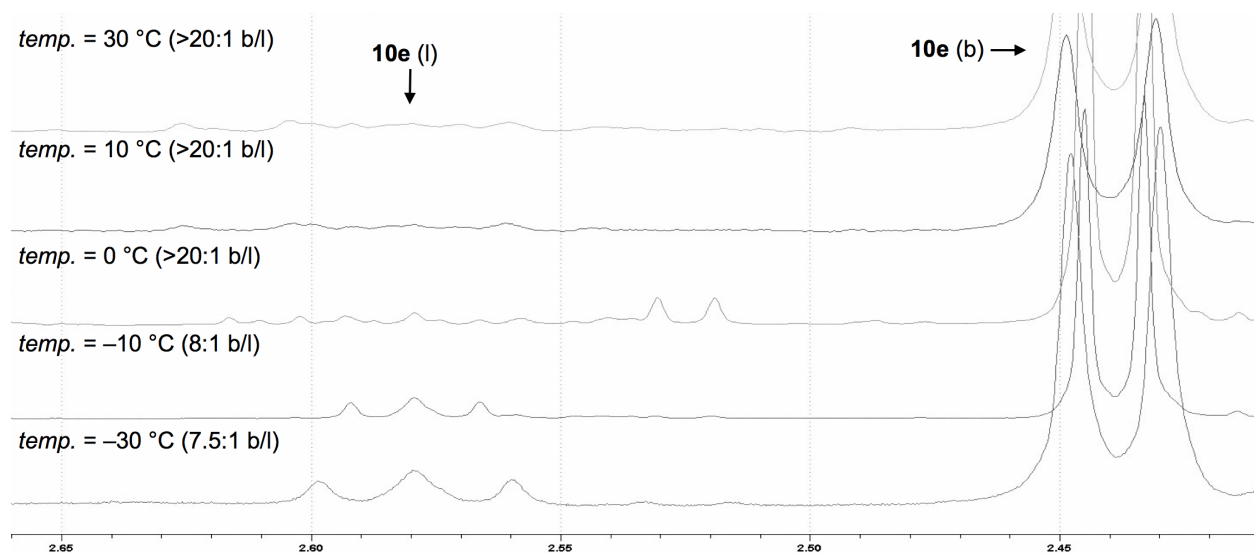

**4. Hydromethylation of fusicoccane substrate 2.**

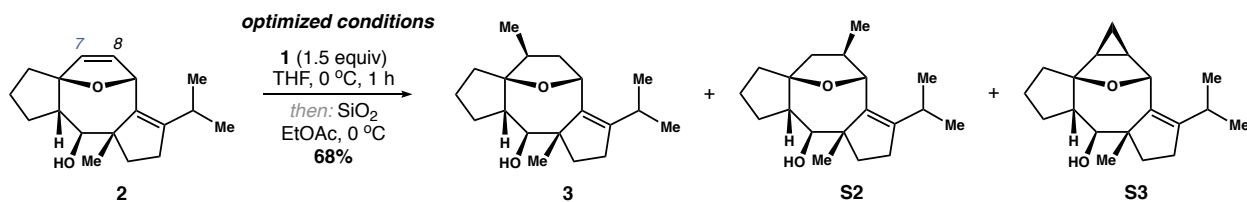

| deviation from optimal conditions | observations                 | 3:S2:S3 (by NMR) | 3 (% yield) |
|-----------------------------------|------------------------------|------------------|-------------|
| <b>none</b>                       | <b>&gt;95% conversion</b>    | <b>21:1:0</b>    | <b>68</b>   |
| 1.0 equiv. 1                      | ~20% conversion              | 1:0:20           | n.d.        |
| aq. HCl (3 M) as proton source    | complex, intractable mixture | n.d.             | n.d.        |
| reaction temp = 50 °C             | no rxn                       | n.d.             | n.d.        |
| reaction temp = 23 °C             | 47% conversion               | 5:1:3            | 8           |
| reaction temp = -20 °C            | 87% conversion               | 19:1:0           | 46          |
| PhMe/THF (2:1)                    | 85% conversion               | 19:2:1           | 61          |
| PhMe, 1 equiv DMAP                | 63% conversion               | 2:1:1            | 29          |



## 5. Experimental Procedures and Characterization Data

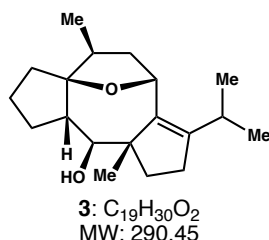

**C3-desmethyl-fusiocane 3.** A flask charged with a solution of **2**<sup>12</sup> (55 mg, 0.20 mmol) in THF (2.0 mL) was cooled to 0 °C. Separately, a Schlenk tube (25 mL) was charged with a 0.36 M (PhMe) solution of **1** (0.11 mL, 0.30 mmol) and concentrated under reduced pressure (ca. 1.0 Torr, 30 min). The Schlenk tube was backfilled with nitrogen and cooled to 0 °C. The solution of **2** in THF (2.0 mL) was added to the Schlenk flask via syringe and the reaction was maintained at 0 °C for 1 h. The reaction mixture was then transferred via cannula to a stirred suspension of SiO<sub>2</sub>

(2 g) in EtOAc (5 mL) maintained at 0 °C. The resulting slurry was rapidly stirred for 6 h then filtered and the filter cake was washed with EtOAc (3 x 5 mL). The combined organic extracts were concentrated under reduced pressure. The resulting residue was purified by flash chromatography (SiO<sub>2</sub>, 5:1 hexanes/Et<sub>2</sub>O) to afford **3** (41 mg, 0.14 mmol, 68% yield) as a yellow oil: <sup>1</sup>H NMR (600 MHz, CDCl<sub>3</sub>) δ<sub>H</sub> 4.61 (d, *J* = 7.6 Hz, 1H), 3.48 (d, *J* = 10.7 Hz, 1H), 2.52 (sept, *J* = 6.8 Hz, 1H), 2.27–2.18 (m, 3H), 2.18–2.10 (m, 2H), 2.02–1.95 (m, 2H), 1.94–1.89 (m, 1H), 1.88–1.82 (m, 1H), 1.81–1.70 (m, 5H), 1.60–1.51 (m, 3H), 1.37–1.29 (m, 2H), 1.09 (s, 3H), 1.05 (d, *J* = 6.9 Hz, 3H), 0.98 (d, *J* = 6.9 Hz, 3H), 0.95 (d, *J* = 6.8 Hz, 3H); <sup>13</sup>C NMR (150 MHz, CDCl<sub>3</sub>) δ<sub>C</sub> **C**: 148.7, 148.2, 117.4, 77.4; **CH**: 141.3, 113.4, 106.5; **CH<sub>2</sub>**: 36.7, 24.3; **CH<sub>3</sub>**: 26.1, 9.9; IR (thin film): 3443, 2930, 1466 cm<sup>-1</sup>. HRMS-DART (*m/z*) [M+H]<sup>+</sup> calculated for C<sub>19</sub>H<sub>31</sub>O<sub>2</sub> = 291.2324; found 291.2302. The relative stereochemistry of structure **3** was confirmed by X-ray crystallography. These data have been deposited in the Cambridge Crystallographic Data Center (CCDC) under **Deposition Number 2059774**.

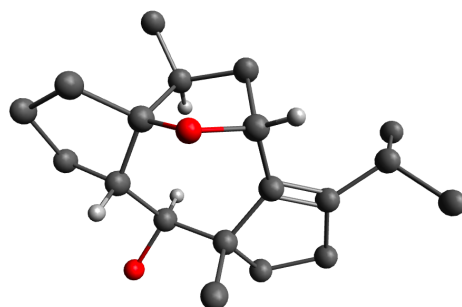

**Figure S3.** X-ray crystal structure of **3** [CCDC 2059774].

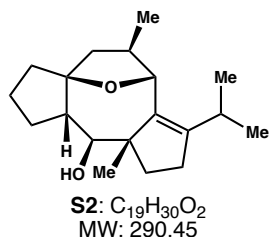

**C8-regioisomer of 3 (S2).** An analytical sample of **S2** was prepared by preparatory TLC (9:1 hexanes/Et<sub>2</sub>O): <sup>1</sup>H NMR (600 MHz, CDCl<sub>3</sub>) δ<sub>H</sub> 4.06 (s, 1H), 3.33 (d, *J* = 10.5 Hz, 1H), 2.50 (sept, *J* = 6.7 Hz, 1H), 2.29–2.19 (m, 2H), 2.20–2.09 (m, 4H), 2.05–1.92 (m, 4H), 1.81–1.69 (m, 4H), 1.68–1.51 (m, 6H), 1.39–1.31 (m, 2H), 1.15 (d, *J* = 6.9 Hz, 3H), 1.10 (s, 3H), 1.00 (d, *J* = 6.7 Hz, 3H), 0.97 (d, *J* = 6.7 Hz, 3H); <sup>13</sup>C NMR (150 MHz, CDCl<sub>3</sub>) δ<sub>C</sub> **C**: 148.7, 148.2, 117.4, 77.4; **CH**: 141.3, 113.4, 106.5; **CH<sub>2</sub>**: 36.7, 24.3; **CH<sub>3</sub>**: 26.1, 9.9; IR (thin film): 3443, 2930, 1466 cm<sup>-1</sup>. HRMS-

DART (*m/z*) [M+H]<sup>+</sup> calculated for C<sub>19</sub>H<sub>31</sub>O<sub>2</sub> = 291.2324; found 291.2302.

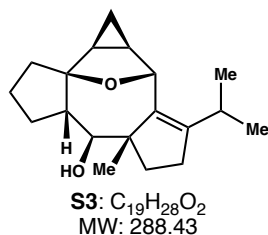

**Cyclopropyl fusicoccane analog S3.** A Schlenk flask was added Et<sub>2</sub>Zn (1.2 mL, 1.0 mmol, 0.83 M in hexanes) and 0.26 mL CH<sub>2</sub>Cl<sub>2</sub>. The reaction was cooled to 0 °C and a solution of freshly distilled CF<sub>3</sub>CO<sub>2</sub>H<sup>2</sup> (0.08 mL, 1 mmol) in 0.2 mL of CH<sub>2</sub>Cl<sub>2</sub> was added via syringe over 5 min. The mixture was then stirred at 0 °C for 20 min during which time a white precipitate formed. The reaction mixture was warmed to 35 °C in a pre-heated oil bath for 10 min to create a homogenous solution, then cooled back down to 0 °C for 5 min. A solution of CH<sub>2</sub>I<sub>2</sub> (0.08 mL, 1 mmol) in 0.2 mL of CH<sub>2</sub>Cl<sub>2</sub>

was added to the reaction at 0 °C over 5 min. The reaction mixture was maintained at 0 °C for 20 min, then a solution of **2** (0.055 g, 0.20 mmol) in CH<sub>2</sub>Cl<sub>2</sub> (1.2 mL) was added over 5 min. The reaction was warmed to rt and maintained for 4 h. The reaction was then diluted with EtOAc (5 mL), transferred to a separatory funnel, and washed with sat. NaHCO<sub>3</sub> (10 mL). The aqueous layer was extracted EtOAc (3 x 10 mL). The combined organic extracts were washed sat. sodium thiosulfate (20 mL), then with brine (20 mL). The organic layer was then dried over Na<sub>2</sub>SO<sub>4</sub>, filtered and concentrated under reduced pressure. No further purification was necessary. This procedure returned an intractable mixture of **S3** and **2** (9:1, 0.055 g). Characterization data for **S3** = <sup>1</sup>H NMR (400 MHz, CDCl<sub>3</sub>) δ<sub>H</sub> 4.81 (br s, 1H), 3.58 (dd, *J* = 10.8, 4.5 Hz, 1H), 2.66 (hep, *J* = 6.8 Hz, 1H), 2.29–2.12 (m, 3H), 2.02–1.95 (m, 1H), 1.83–1.69 (m, 5H), 1.50–1.45 (m, 1H), 1.26 (d, *J* = 4.5 Hz, 1H), 1.22–1.17 (m, 1H), 1.05 (s, 3H), 1.02 (d, *J* = 6.8 Hz, 3H), 0.96 (d, *J* = 6.8 Hz, 3H), 0.52–0.47 (m, 1H), 0.39 (q, *J* = 4.3 Hz, 1H); <sup>13</sup>C NMR (150 MHz, CDCl<sub>3</sub>) δ<sub>C</sub> C: 141.4, 141.3, 89.3, 54.9; CH: 79.2, 77.0, 49.9, 26.9, 25.2, 19.6; CH<sub>2</sub>: 38.3, 33.3, 26.7, 25.1, 18.5, 6.8; CH<sub>3</sub>: 21.2, 20.9, 17.2; IR (thin film): 3481, 1447 cm<sup>-1</sup>; HRMS-DART (*m/z*) [M+H]<sup>+</sup> calculated for C<sub>19</sub>H<sub>29</sub>O<sub>2</sub> = 289.2168; found 289.2173.

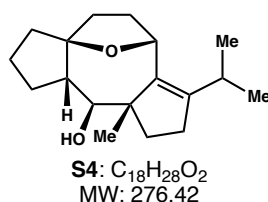

**Net-hydrogenation product S4.** An authentic sample of this compound was prepared by hydrogenation: A solution of RhCl(PPh<sub>3</sub>)<sub>3</sub> (14 mg, 0.015 mmol) in PhH (0.9 mL) was treated with a solution of **2** (27 mg, 0.10 mmol) in PhH (2.4 mL). The reaction was equipped with a balloon of hydrogen gas and maintained at rt. After 1.5 h, an additional quantity of RhCl(PPh<sub>3</sub>)<sub>3</sub> (14 mg, 0.015 mmol) was added. The reaction was continued at rt. After 12 h, the reaction was concentrated under reduced pressure. The resulting

crude residue was purified by flash column chromatography (SiO<sub>2</sub>; 4:1 hexanes/EtOAc) to afford **S4** (11 mg, 0.040 mmol, 40% yield) as a white foam; <sup>1</sup>H NMR (600 MHz, CDCl<sub>3</sub>) δ<sub>H</sub> 5.04 (d, *J* = 7.3 Hz, 1H), 3.32 (d, *J* = 10.6 Hz, 1H), 2.54 (heptet, *J* = 6.7 Hz, 1H), 2.24–2.11 (m, 4H), 1.99–1.89 (m, 3H), 1.78–1.69 (m, 2H), 1.61–1.53 (m, 4H), 1.52–1.46 (m, 1H), 1.39–1.32 (m, 2H), 1.08 (s, 3H), 0.97 (d, *J* = 6.8 Hz, 3H), 0.94 (d, *J* = 6.8 Hz, 1H); <sup>13</sup>C NMR (150 MHz, CDCl<sub>3</sub>) δ<sub>C</sub> C: 141.9, 141.7, 89.4, 55.6; CH: 80.9, 76.8, 50.3, 27.0; CH<sub>2</sub>: 38.5, 38.1, 35.2, 29.6, 26.6, 25.4, 18.4; CH<sub>3</sub>: 20.9, 20.7, 17.1; IR (thin film): 3438, 1466, 1453 cm<sup>-1</sup>; HRMS-DART (*m/z*) [M+NH<sub>4</sub>]<sup>+</sup> calculated for C<sub>18</sub>H<sub>32</sub>O<sub>2</sub>N = 294.2428; found 294.2422.

### Substrate Synthesis

Alkenes **6**, **11a**, **11c–11g**, **11o** and **11p** were prepared via Wittig olefination of the corresponding ketones as described below.

**General procedure:** A freshly titrated solution of *n*-BuLi (1.1 equiv) in THF was added dropwise to a stirred suspension of Ph<sub>3</sub>PMel (1.4 equiv) in Et<sub>2</sub>O (0.5 M) at 0 °C. The resulting solution was maintained at 0 °C for 1 h, then treated with a solution of ketone (1 equiv) in Et<sub>2</sub>O (1 M). The ketone was generally consumed within 1–6 h as judged by TLC of the unpurified reaction mixture. At this point, saturated aq. NH<sub>4</sub>Cl (1 mL/mmol) was added via syringe and the reaction vessel was warmed to rt. The resulting slurry was added to a separatory funnel and extracted with Et<sub>2</sub>O

(3 x 10 mL/mmol). The combined organic extracts were washed with water and brine, dried over MgSO<sub>4</sub>, filtered, and concentrated under reduced pressure. The resulting residues were purified as indicated.

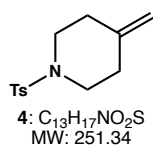

**4-Methylene-1-tosylpiperidine (4).** The title compound was prepared from **6** using the General Procedure. Purification by flash chromatography (SiO<sub>2</sub>, 4:1 hexanes/EtOAc) afforded **4** (7.23 g, 28.8 mmol, 61% yield): <sup>1</sup>H NMR (400 MHz, CDCl<sub>3</sub>) δ<sub>H</sub> 7.64 (d, *J* = 8.2 Hz, 2H), 7.31 (d, *J* = 7.9 Hz, 2H), 4.69 (s, 2H), 3.04 (t, *J* = 5.8 Hz, 4H), 2.42 (s, 3H), 2.30 (t, *J* = 5.8 Hz, 4H). All other characterization data was identical to previously reported values.<sup>13</sup>

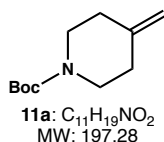

**tert-Butyl-4-methylene-1-tosylpiperidine (11a).** The title compound was prepared from commercial 1-(*tert*-butoxycarbonyl)-4-piperdone [79099-07-3] using the General Procedure. Purification by flash chromatography (SiO<sub>2</sub>, 10:1 hexanes/EtOAc) afforded **11a** (1.91 g, 9.60 mmol, 96% yield): <sup>1</sup>H NMR (400 MHz, CDCl<sub>3</sub>) δ<sub>H</sub> 4.76, (s, 2H), 3.44 (t, *J* = 5.8 Hz, 4H), 2.20 (t, *J* = 5.7 Hz, 4H), 1.50 (s, 9H). All other characterization data was identical to previously reported values.<sup>14</sup>

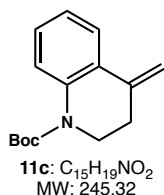

**tert-Butyl-4-methylene-3,4-dihydroquinoline-1(2H)-carboxylate (11c).** The title compound was prepared from commercial *tert*-butyl-4-oxo-3,4-dihydroquinoline-1(2H)-carboxylate [179898-00-1] using the General Procedure. Purification by flash chromatography (SiO<sub>2</sub>, 10:1 hexanes/EtOAc) afforded **11c** (335 mg, 1.37 mmol, 68% yield): <sup>1</sup>H NMR (400 MHz, CDCl<sub>3</sub>) δ<sub>H</sub> 7.68 (d, *J* = 8.0 Hz, 1H), 7.62 (d, *J* = 8.2 Hz, 1H), 7.23 (t, *J* = 8.4 Hz, 1H), 7.07 (t, *J* = 8.2 Hz, 1H), 5.64 (s, 1H), 5.00 (s, 1H); 3.82 (t, *J* = 6.0 Hz, 2H), 2.74 (t, *J* = 6.0 Hz, 2H), 1.55 (s, 9H). <sup>13</sup>C NMR (150 MHz, CDCl<sub>3</sub>) δ<sub>C</sub> C: 153.6, 139.0, 138.3, 81.1; CH: 127.8, 127.3, 124.8, 124.2, 123.9; CH<sub>2</sub>: 109.3, 44.2, 32.8; CH<sub>3</sub>: 28.5; IR (thin film): 1365, 1694, 2977 cm<sup>-1</sup>; HRMS-DART (m/z) [M+H]<sup>+</sup> calculated for C<sub>15</sub>H<sub>19</sub>NO<sub>2</sub>H = 246.1494; found 246.1494.

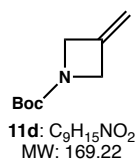

**tert-Butyl-3-methyleneazetidine-1-carboxylate (11d).** The title compound was prepared from commercial 1-Boc-3-azetidinone [398489-26-4] using the General Procedure. Purification by flash chromatography (SiO<sub>2</sub>, 9:1 hexanes/EtOAc) afforded **11d** (247 mg, 1.64 mmol, 82% yield): <sup>1</sup>H NMR (400 MHz, CDCl<sub>3</sub>) δ<sub>H</sub> 5.00 (m, *J* = 2.4 Hz, 2H), 4.50 (t, *J* = 2.5 Hz, 4H), 1.47 (s, 9H). All other characterization data was identical to previously reported values.<sup>15</sup>

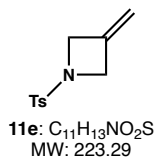

**3-Methylene-1-tosylazetidine (11e).** The title compound was prepared from commercial *N*-tosyl-3-azetidinone [76543-27-6] using the General Procedure. Purification by flash chromatography (SiO<sub>2</sub>, 7:1 hexanes/EtOAc) afforded **11e** (328 mg, 1.47 mmol, 76% yield): <sup>1</sup>H NMR (400 MHz, CDCl<sub>3</sub>) δ<sub>H</sub> 7.78 (d, *J* = 8.4 Hz, 2H), 7.39 (d, *J* = 8.0 Hz, 2H), 4.94 (app quint, *J* = 2.5 Hz, 2H), 4.41 (t, *J* = 2.4 Hz, 4H), 2.48 (s, 3H); <sup>13</sup>C NMR (150 MHz, CDCl<sub>3</sub>) δ<sub>C</sub> C: 144.1, 134.4, 131.2; CH: 129.7, 128.1; CH<sub>2</sub>: 108.2, 59.6; CH<sub>3</sub>: 21.3; IR (thin film): 1152, 1338, 2967 cm<sup>-1</sup>; HRMS-DART (m/z) [M+H]<sup>+</sup> calculated for C<sub>11</sub>H<sub>14</sub>NO<sub>2</sub>S = 224.0745; found 224.0737.

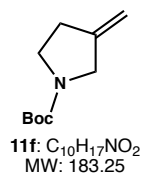

**tert-Butyl-3-methylenepyrrolidine-1-carboxylate (11f).** The title compound was prepared from commercial *N*-Boc-3-pyrrolidinone [101385-93-7] using the General Procedure. Purification by flash chromatography (SiO<sub>2</sub>, 9:1 hexanes/Et<sub>2</sub>O) afforded **11f** (217 mg, 1.18 mmol, 59% yield): <sup>1</sup>H NMR (400 MHz, CDCl<sub>3</sub>) δ<sub>H</sub> 4.99–4.91 (m, 2H), 3.94 (s, 2H), 3.48 (t, *J* = 7.2 Hz, 3H), 2.57 (t, *J* = 7.3 Hz, 2H), 1.49 (s, 9H). All other characterization data was identical to previously reported values.<sup>16</sup>

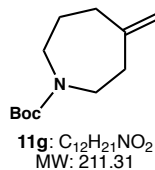

**tert-Butyl-4-methyleneazepane-1-carboxylate (11g).** The title compound was prepared from commercial *N*-Boc-hexahydro-1H-azepin-4-one [188975-88-4] using the General Procedure. Purification by flash chromatography (SiO<sub>2</sub>, 9:1 hexanes/Et<sub>2</sub>O) afforded **11g** (513 mg, 2.43 mmol, 97% yield): <sup>1</sup>H NMR (400 MHz, CDCl<sub>3</sub>) δ<sub>H</sub> 4.89–4.69 (m, 2H), 3.44–3.30 (m, 4H), 2.43 (br s, 2H), 2.25 (br s, 2H), 1.71–1.66 (m, 2H), 1.48 (s, 9H). All other characterization data was identical to previously reported values.<sup>17</sup>

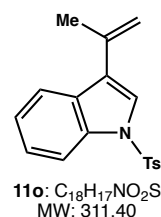

**3-(Prop-1-en-2-yl)-1-tosyl-1H-indole (11o).** The title compound was prepared from commercial 3-acetyl-*N*-(*p*-toluenesulfonyl)indole [104142-24-7] using the General Procedure. Purification by flash chromatography (SiO<sub>2</sub>, 4:1 hexanes/EtOAc) afforded **11o** (737 mg, 2.37 mmol, 79% yield): <sup>1</sup>H NMR (400 MHz, CDCl<sub>3</sub>) δ<sub>H</sub> 7.99 (dq, *J* = 0.7, 0.6 Hz, 1H), 7.81 (d, *J* = 7.6 Hz, 1H), 7.77 (d, *J* = 8.3 Hz, 2H), 7.56 (s, 1H), 7.36–7.20 (m, 5H), 5.51 (s, 1H), 5.22 (t, *J* = 1.4 Hz, 1H), 2.33 (s, 3H), 2.17 (q, *J* = 0.7 Hz, 3H); <sup>13</sup>C NMR (150 MHz, CDCl<sub>3</sub>) δ<sub>C</sub> C: 145.1, 136.3, 135.7, 135.2, 129.0, 124.0; CH: 129.9, 126.9, 124.7, 123.6, 123.5, 121.4, 113.7; CH<sub>2</sub>: 113.8; CH<sub>3</sub>: 23.1, 21.5; IR (thin film): 1173, 1370, 1597 cm<sup>-1</sup>; HRMS-DART (*m/z*) [M+H]<sup>+</sup> calculated for C<sub>18</sub>H<sub>18</sub>NO<sub>2</sub>S = 312.1058; found 312.1068.

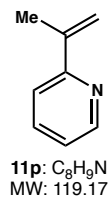

**2-(prop-1-en-2-yl)pyridine (11p).** The title compound was prepared from commercial 2-acylpyridine [1122-62-9] using the General Procedure. Purification by flash chromatography (SiO<sub>2</sub>, 99:1 pentane/Et<sub>2</sub>O) afforded **11p** (388 mg, 3.24 mmol, 81% yield): <sup>1</sup>H NMR (400 MHz, CDCl<sub>3</sub>) δ<sub>H</sub> 8.59 (ddd, *J* = 4.8, 1.8, 0.9, 1H), 7.65 (ddd, *J* = 15.5, 1.8, 1.8, 1H), 7.46–7.51 (m, 1H), 7.16 (ddd, *J* = 7.4, 4.8, 1.1, 1H), 5.85 (d, *J* = 0.7, 1H), 5.30 (app q, *J* = 1.4, 1H), 2.22 (d, *J* = 0.7, 3H). All other characterization data was identical to previously reported values.<sup>18</sup>

## Other Substrates

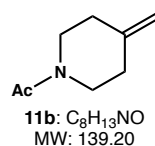

**1-(4-methylenepiperidin-1-yl)ethan-1-one (11b).** The title compound was prepared from **11a** using the procedure described by Li.<sup>19</sup> <sup>1</sup>H NMR (400 MHz, CDCl<sub>3</sub>) δ<sub>H</sub> 4.78, (s, 2H), 3.59 (t, *J* = 5.9 Hz, 2H), 3.43 (t, *J* = 5.8 Hz, 2H), 2.22 (dt, *J* = 6.2 Hz, 4H), 2.12 (s, 3H). All characterization data was identical to previously reported values.<sup>19</sup>

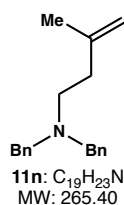

***N,N*-Dibenzyl-3-methylbut-3-en-1-amine (11n).** Sodium iodide (1.49 g, 10.0 mmol) was added in a single portion to a solution of (*O*-tosyl)-3-methyl-3-butene-1-ol (1.20 g, 5.00 mmol) in acetone (10 mL) at rt. Dibenzylamine (1.0 mL, 10 mmol) was added via syringe and the reaction mixture was heated to 70 °C. After 18 h, the resulting slurry was cooled to rt and filtered through a pad of Celite. The filter cake was washed with acetone (3 x 10 mL) and the combined filtrate fractions were concentrated under reduced pressure. The resulting crude residue was purified by flash chromatography (SiO<sub>2</sub>, benzene) to afford **11n** (1.09 g, 4.11, 82% yield) as a colorless oil: <sup>1</sup>H NMR (400 MHz,

CDCl<sub>3</sub>)  $\delta_H$  7.40–7.25 (m, 10H), 4.73 (br s, 1H), 4.66 (br s, 1H), 3.61 (s, 4H), 2.59 (t,  $J = 6.7$  Hz, 2H), 2.28 (t,  $J = 6.7$  Hz) 1.63 (s, 3H); <sup>13</sup>C NMR (150 MHz, CDCl<sub>3</sub>)  $\delta_C$  C: 144.4, 140.0; CH: 128.9, 128.3, 126.9; CH<sub>2</sub>: 111.0, 58.2, 51.8, 35.4; CH<sub>3</sub>: 22.5; IR (thin film): 3051, 2928, 1097 cm<sup>-1</sup>; HRMS-DART (m/z) [M+H]<sup>+</sup> calculated for C<sub>19</sub>H<sub>24</sub>NO = 266.1908; found 266.1909.

### Data for structures in Table 1 and Scheme 1

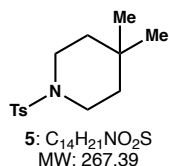

**4,4-Dimethyl-1-tosylpiperidine (5).** Gram-scale procedure: A two-neck flask equipped with a Schlenk adapter was flushed with nitrogen and then charged with a solution of **1** (0.36 M in PhMe, 13.2 mL, 4.78 mmol). Under a positive pressure of nitrogen, the flask was equipped with a distillation head. PhMe was removed by distillation and trace PhMe was removed under vacuum (0.1 torr, 30 min). The flask was backfilled with nitrogen and cooled to 0 °C. After 10 min, a pre-cooled (0 °C) solution of **4** (1.00 g, 3.98 mmol) in THF (4.0 mL) was added stream-wise via syringe. The red solution was maintained at 0 °C for 1 h, then treated sequentially with HCl (20 mL of a 3.0 M in H<sub>2</sub>O) and EtOAc (20 mL). After 1 h, the reaction mixture was warmed to rt. After 3 h, the mixture was transferred to a separatory funnel using EtOAc (50 mL) and washed with saturated NaHCO<sub>3</sub> (2 x 50 mL). The organic layer was dried over MgSO<sub>4</sub>, filtered and concentrated. The crude residue was purified by flash chromatography (SiO<sub>2</sub>, 4:1 hexanes:EtOAc) to provide **5** (947 mg, 3.54 mmol, 89% yield) as a colorless oil: <sup>1</sup>H NMR (400 MHz, CDCl<sub>3</sub>)  $\delta_H$  7.64, (d,  $J = 8.3$  Hz, 2H), 7.31 (d,  $J = 8.0$  Hz, 2H), 2.98 (app t,  $J = 5.7$  Hz, 4H), 2.43 (s, 3H), 1.43 (app t,  $J = 5.8$  Hz, 4H), 0.83 (s, 6H); <sup>13</sup>C NMR (150 MHz, CDCl<sub>3</sub>)  $\delta_C$  C: 143.3, 133.3, 28.2; CH: 129.6, 127.6; CH<sub>2</sub>: 42.6, 37.8; CH<sub>3</sub>: 27.5, 21.5; IR (thin film): 1456, 1410, 2928 cm<sup>-1</sup>. HRMS-DART (m/z) [M+H]<sup>+</sup> calculated for C<sub>14</sub>H<sub>22</sub>NO<sub>2</sub>S = 268.1371; found 268.1381.

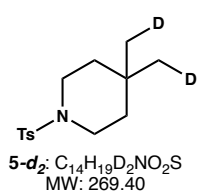

**4,4-Bis(dimethyl-d)-1-tosylpiperidine (5-d<sub>2</sub>).** A solution of **1** (0.36 M in PhMe, 0.67 mL, 0.24 mmol) was concentrated in a Schlenk tube under reduced pressure (0.1 torr, 30 min). The flask as backfilled with nitrogen and cooled to 0 °C. After 10 min, a pre-cooled (0 °C) solution of **4** (50 mg, 0.20 mmol) in THF (2.0 mL) was added stream-wise via syringe. The red solution was maintained at 0 °C for 1 h, then treated sequentially with DCl (2.0 mL of a 3.0 M in D<sub>2</sub>O) and EtOAc (4 mL). The reaction mixture was warmed to rt. After 3 h, the mixture was transferred to a separatory funnel using EtOAc (10 mL) and washed with saturated NaHCO<sub>3</sub> (2 x 10 mL). The organic layer was dried over MgSO<sub>4</sub>, filtered and concentrated. The crude residue was purified by flash chromatography (SiO<sub>2</sub>, 4:1 hexanes:EtOAc) to provide **5-d<sub>2</sub>** (49 mg, 0.18 mmol, 90% yield): <sup>1</sup>H NMR (400 MHz, CDCl<sub>3</sub>)  $\delta_H$  7.67, (d,  $J = 8.3$  Hz, 2H), 7.34 (d,  $J = 8.0$  Hz, 2H), 3.00 (app t,  $J = 5.7$  Hz, 4H), 2.46 (s, 3H), 1.46 (app t,  $J = 5.8$  Hz, 4H), 0.83 (s, 4H); HRMS-DART (m/z) [M+H]<sup>+</sup> calculated for C<sub>14</sub>H<sub>20</sub>D<sub>2</sub>NO<sub>2</sub>S = 270.1527; found = 270.1544. The percent deuterium incorporation was determined by integration of distinct signals at 0.81 ppm (**5**) and 0.79 ppm (**5-d<sub>2</sub>**). This analysis revealed a >90% deuterium incorporation.

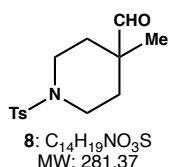

**4-Methyl-1-tosylpiperidine-4-carbaldehyde (8).** A solution of **1** (0.36 M in PhMe, 1.67 mL, 0.60 mmol) was concentrated in a Schlenk tube under reduced pressure (0.1 torr, 30 min). The flask as backfilled with nitrogen and cooled to 0 °C. After 10 min, a pre-cooled solution of **4** (126 mg, 0.50 mmol) in THF (5.0 mL) at 0 °C was added stream-wise via syringe. The red solution was maintained at 0 °C for 1 h, then purged with O<sub>2</sub>. The reaction mixture was maintained under a balloon of O<sub>2</sub> at 0 °C. After 3 h, the reaction was treated with 3 M aq. HCl (5 mL) and the stirred slurry was warmed to rt. After 5 h, the reaction mixture was transferred to a separatory funnel using EtOAc (10 mL) and washed with saturated aq. NaHCO<sub>3</sub> (2 x 10 mL) and brine (10 mL). The organic layer

was separated, dried over MgSO<sub>4</sub>, filtered and concentrated under reduced pressure. Analysis of the unpurified reaction mixture by <sup>1</sup>H NMR spectroscopy revealed ~42% conversion of **4** to **8**, alongside several other intractable impurities and net hydromethylation product **5**. An analytical sample of **8** (23 mg, 0.08 mmol, 16% yield) was prepared by flash chromatography (SiO<sub>2</sub>, 2:1 hexanes/EtOAc): <sup>1</sup>H NMR (400 MHz, CDCl<sub>3</sub>) δ<sub>H</sub> 9.32 (s, 1H), 7.59 (d, *J* = 8.1 Hz, 2H), 7.30 (d, *J* = 8.1 Hz, 1H), 3.43 (m, 2H), 2.51 (td, *J* = 3.2, 2.9, 2.0 Hz, 2H), 2.42 (s, 3H), 2.04 (m, 2H), 1.60 (td, *J* = 4.3, 3.5, 3.4 Hz, 2H), 1.0q (s, 3H); <sup>13</sup>C NMR (150 MHz, CDCl<sub>3</sub>) δ<sub>C</sub> **C**: 143.8, 133.0, 44.4; **CH**: 204.5; **CH**<sub>2</sub>: 43.2, 31.4; **CH**<sub>3</sub>: 129.7, 127.6, 21.7, 21.5; **IR** (thin film): 1161, 1721, 2924 cm<sup>-1</sup>; **HRMS-DART** (*m/z*) [M+H]<sup>+</sup> calculated for C<sub>14</sub>H<sub>20</sub>NO<sub>3</sub>S = 282.1164; found 282.1151.

**General Procedure:** A solution of **1** (ca. 0.36 M in PhMe, 1.2 equiv) was concentrated in a Schlenk tube under reduced pressure (0.1 torr, 30 min). The flask was backfilled with nitrogen and cooled to 0 °C. After 10 min, a pre-cooled solution of alkene (1 equiv) in THF (0.1 M) at 0 °C was added stream-wise via syringe. The resulting red solution was maintained at 0 °C for the indicated amount of time, then treated with a proton source following one of the workup procedures listed below:

**Workup A (HCl):** Following the indicated reaction time, the reaction mixture was transferred via cannula to a cooled slurry of 3 M aq. HCl (5 mL/mmol alkene) and EtOAc (5 mL/mmol alkene) maintained at -10 °C. The resulting rapidly stirred slurry was allowed warm to rt over 6 h, then added to a solution of saturated aq. NaHCO<sub>3</sub> (10 mL/mmol of alkene). The resulting slurry was rapidly stirred for 4 h. A gradual color change from red to yellow to colorless indicated breakdown of titanium & aluminum impurities. The slurry was added to a separatory funnel and extracted with EtOAc (2 x 10 mL). The combined organic extracts were washed with brine (25 mL), dried over MgSO<sub>4</sub> and concentrated under reduced pressure. The resulting crude residue was then purified as indicated.

**Workup B (SiO<sub>2</sub>):** Following the indicated reaction time, the reaction mixture was transferred via cannula to a cooled slurry of SiO<sub>2</sub> (3 g/mmol alkene) and EtOAc (3 mL/mmol alkene) maintained at -10 °C. The resulting rapidly stirred slurry was allowed warm to rt over 6 h, then filtered over a pad of celite. The filter cake was washed with EtOAc (2 x 5 mL). The combined organic extracts were added to a solution of saturated aq. NaHCO<sub>3</sub> (10 mL/mmol of alkene). The resulting slurry was rapidly stirred for 4 h. A gradual color change from red to yellow to colorless indicated breakdown of titanium & aluminum impurities. The slurry was added to a separatory funnel and extracted with EtOAc (2 x 10 mL). The combined organic extracts were washed with brine (25 mL), dried over MgSO<sub>4</sub> and concentrated under reduced pressure. The resulting crude residue was then purified as indicated.

**Workup C (TFA):** Following the indicated reaction time, the reaction mixture was cooled to -78 °C and TFA (15 equiv) was added via syringe. The reaction mixture was maintained at -78 °C for 15 min, then allowed to warm to rt over the course of 6 h. The resulting mixture was exposed to air and added to a solution of saturated aq. NaHCO<sub>3</sub> (10 mL/mmol of alkene). The resulting slurry was rapidly stirred for 4 h. A gradual color change from red to yellow to colorless indicated breakdown of titanium & aluminum impurities. The slurry was added to a separatory funnel and extracted with EtOAc (2 x 10 mL). The combined organic extracts were washed with brine (25 mL), dried over MgSO<sub>4</sub> and concentrated under reduced pressure. The resulting crude residue was then purified as indicated.

## Data for structures in Scheme 2

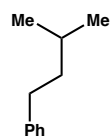

**10a:** C<sub>11</sub>H<sub>16</sub>  
MW: 148.25

**Isopentylbenzene (10a).** The title compound was prepared from **9a** (44 mg, 0.33 mmol) following the General Procedure. After 1 h, the reaction was completed using Workup A. The resulting crude residue was purified by flash chromatography (SiO<sub>2</sub>, hexane) to afford **10a** (35 mg, 0.23 mmol, 71% yield, >20:1 b/l ratio) as a colorless oil: **<sup>1</sup>H NMR** (400 MHz, CDCl<sub>3</sub>)  $\delta_H$  7.38–7.26 (m, 2H), 7.25–7.17 (m, 3H), 2.64 (app t,  $J$  = 8.0 Hz, 2H), 1.62 (app. sept.,  $J$  = 6.7 Hz, 1H), 1.53 (q,  $J$  = 7.9 Hz, 2H), 0.96 (d,  $J$  = 6.4 Hz, 6H). All other characterization was identical to reported values.<sup>20</sup>

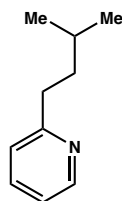

**10b:** C<sub>10</sub>H<sub>15</sub>N  
MW: 149.24

**2-Isopentylpyridine (10b).** The title compound was prepared from **9b** (67 mg, 0.50 mmol) following the General Procedure. After 3 h, the reaction was completed using Workup A. The resulting crude residue was purified by flash chromatography (SiO<sub>2</sub>, 10:1 hexanes/EtOAc) to afford **10b** (63 mg, 0.42 mmol, 71% yield, 6:1 b/l ratio) as a yellow oil: **<sup>1</sup>H NMR** (400 MHz, CDCl<sub>3</sub>) **major isomer**  $\delta_H$  8.51 (d,  $J$  = 4.1 Hz, 1H), 7.56 (t,  $J$  = 7.5 Hz, 1H), 7.13 (d,  $J$  = 7.1 Hz, 1H), 7.07 (t,  $J$  = 5.6 Hz, 1H), 2.81–2.72 (m, 2H), 1.65–1.55 (m, 3H), 0.94 (d,  $J$  = 5.9 Hz, 6H). **minor isomer**  $\delta_H$  8.51 (d,  $J$  = 4.1 Hz, 1H), 7.56 (t,  $J$  = 7.5 Hz, 1H), 7.13 (d,  $J$  = 7.1 Hz, 1H), 7.07 (t,  $J$  = 5.6 Hz, 1H), 2.81–2.72 (m, 2H), 1.79–1.67 (m, 2H), 1.65–1.55 (m, 2H), 1.37–1.30 (m, 2H), 0.88 (t,  $J$  = 6.6 Hz, 3H). All other characterization was identical to reported values.<sup>21</sup>

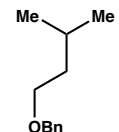

**10c:** C<sub>12</sub>H<sub>18</sub>O  
MW: 178.28

**Benzyl isoamyl ether (10c).** The title compound was prepared from **9c** (82 mg, 0.50 mmol) following the General Procedure. After 1 h, the reaction was completed using Workup A. The resulting crude residue was purified by flash chromatography (SiO<sub>2</sub>, 10:1 hexane/Et<sub>2</sub>O) to afford **10c** (46 mg, 26 mmol, 52% yield, >20 b/l ratio) as a yellow oil: **<sup>1</sup>H NMR** (400 MHz, CDCl<sub>3</sub>)  $\delta_H$  7.39–7.33 (m, 4H), 7.33–7.29 (m, 1H), 4.53 (s, 2H), 3.52 (d,  $J$  = 6.7 Hz, 2H), 1.76 (app. sept.,  $J$  = 6.7 Hz, 1H), 1.54 (q,  $J$  = 6.7 Hz, 2H), 0.93 (d,  $J$  = 6.6 Hz, 6H). All other characterization was identical to reported values.<sup>22</sup>

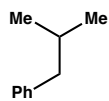

**10d:** C<sub>10</sub>H<sub>14</sub>  
MW: 134.22

**Isobutylbenzene (10d).** The title compound was prepared from **9d** (0.07 mL, 0.50 mmol) following the General Procedure. After 6 h, the reaction was completed using Workup A. The resulting crude residue was purified by flash chromatography (SiO<sub>2</sub>, 20:1 pentanes/Et<sub>2</sub>O) to afford **10d** (52 mg, 0.39 mmol, 78% yield) as a colorless oil: **<sup>1</sup>H NMR** (400 MHz, CDCl<sub>3</sub>)  $\delta_H$  7.34–7.25 (m, 2H), 7.23–7.14 (m, 3H), 2.50 (d,  $J$  = 7.2 Hz, 2H), 1.89 (app. sept.,  $J$  = 6.8 Hz), 0.93 (d,  $J$  = 6.6 Hz, 6H). All other characterization was identical to reported values.<sup>23</sup>

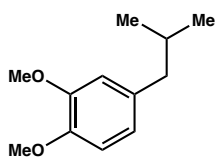

**10e:** C<sub>12</sub>H<sub>18</sub>O<sub>2</sub>  
MW: 194.27

**4-Isobutyl-1,2-dimethoxybenzene (10e).** The title compound was prepared from **9e** (0.36 mg, 0.20 mmol) following the General Procedure. After 3 h, the reaction was completed using Workup A. The resulting crude residue was purified by flash chromatography (SiO<sub>2</sub>, 99:1 hexanes/Et<sub>2</sub>O) to afford **10e** (33 mg, 0.17 mmol, 87% yield, >20:1 b/l ratio) as a colorless oil: **<sup>1</sup>H NMR** (400 MHz, CDCl<sub>3</sub>)  $\delta_H$  6.85–6.77 (m, 1H), 6.74–6.66 (m, 2H), 3.90 (s, 3H), 3.88 (s, 3H), 2.44 (d,  $J$  = 7.2 Hz, 2H), 1.86 (app. sept.,  $J$  = 6.8 Hz, 1H), 0.93 (d,  $J$  = 6.6 Hz, 6H). All other characterization was identical to reported values.<sup>24</sup>

### Data for structures in Scheme 3

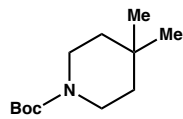

**12a:** C<sub>12</sub>H<sub>23</sub>NO<sub>2</sub>  
MW: 213.32

**tert-Butyl-4,4-dimethylpiperidine-1-carboxylate (12a).** The title compound was prepared from **11a** (99 mg, 0.5 mmol) following the General Procedure. After 1 h, the reaction was completed using Workup A. The resulting crude residue was purified by flash chromatography (SiO<sub>2</sub>, 20:1 hexanes/EtOAc) to afford **12a** (95 mg, 0.45 mmol, 89% yield) as a colorless oil: <sup>1</sup>H NMR (400 MHz, CDCl<sub>3</sub>) δ<sub>H</sub> 3.36 (t, *J* = 5.8 Hz, 2H), 1.45 (s, 9H), 1.39 (t, *J* = 5.8 Hz, 4H), 0.94 (s, 6H); <sup>13</sup>C NMR (150 MHz, CDCl<sub>3</sub>) δ<sub>C</sub> **C**: 155.0, 79.1, 40.3; **CH**<sub>2</sub>: 38.3, 28.8; **CH**<sub>3</sub>: 28.5, 27.7; IR (thin film): 1262, 1695, 2921 cm<sup>-1</sup>. HRMS-DART (m/z) [M+H]<sup>+</sup> calculated for C<sub>12</sub>H<sub>24</sub>NO<sub>2</sub> = 214.1807; found 214.1815.

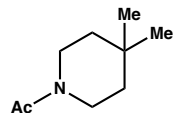

**12b:** C<sub>9</sub>H<sub>17</sub>NO  
MW: 155.24

**1-(4,4-Dimethylpiperidin-1-yl)ethan-1-one (12b).** The title compound was prepared from **11b** (0.28 mg, 0.20 mmol) following the General Procedure. After 1 h, the reaction was completed using Workup A. The resulting crude residue was purified by flash chromatography (SiO<sub>2</sub>, 4:1 hexanes/EtOAc) to afford **12b** (24 mg, 0.15 mmol, 77%) as a yellow oil: <sup>1</sup>H NMR (400 MHz, CDCl<sub>3</sub>) δ<sub>H</sub> 3.55, (t, *J* = 5.9 Hz, 2H), 3.38 (t, *J* = 5.9 Hz, 2H), 2.07 (s, 3H), 1.34 (m, *J* = 6.0 Hz, 4H), 0.97 (s, 6H); <sup>13</sup>C NMR (150 MHz, CDCl<sub>3</sub>) δ<sub>C</sub> **C**: 169.0; **CH**<sub>2</sub>: 43.3, 39.2, 38.3, 38.2, 32.2, 31.6, 29.7; **CH**<sub>3</sub>: 29.2, 27.7, 21.5; IR (thin film): 1262, 1695, 2921 cm<sup>-1</sup>; HRMS-DART (m/z) [M+H]<sup>+</sup> calculated for C<sub>9</sub>H<sub>18</sub>NO = 156.1388; found 156.1326.

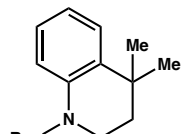

**12c:** C<sub>16</sub>H<sub>23</sub>NO<sub>2</sub>  
MW: 261.37

**tert-Butyl-4,4-dimethyl-3,4-dihydroquinoline-1(2H)-carboxylate (12c).** The title compound was prepared from **11c** (28 mg, 0.20 mmol) following a modification of General Procedure. After 1 h, the reaction was completed using Workup A. The resulting crude residue consisting of an inseparable mixture of **11c** and **12c** was dissolved in CH<sub>2</sub>Cl<sub>2</sub> (3 mL) and treated with *m*-CBPA (34 mg, 0.20 mmol) at rt. After 2 h, the reaction mixture was filtered over a pad of Celite and concentrated under reduced pressure. The resulting residue was purified by flash chromatography (SiO<sub>2</sub>, 10:1 hexanes/Et<sub>2</sub>O) to afford **12c** (38 mg, 0.16 mmol, 31% yield) as a colorless oil: <sup>1</sup>H NMR (400 MHz, CDCl<sub>3</sub>) δ<sub>H</sub> 7.61 (d, *J* = 8.0 Hz, 1H), 7.28 (d, *J* = 7.8 Hz, 1H), 7.12 (t, *J* = 7.8 Hz, 1H), 7.02 (t, *J* = 7.4 Hz, 1H), 3.74 (t, *J* = 6.1 Hz, 2H), 1.75 (t, *J* = 6.1 Hz, 2H), 1.52 (s, 9H), 1.30 (s, 6H). <sup>13</sup>C NMR (150 MHz, CDCl<sub>3</sub>) δ<sub>C</sub> **C**: 154.1, 138.0, 137.3, 80.9, 33.2; **CH**: 125.9, 125.7, 124.5, 123.6, 41.9, 38.7; **CH**<sub>2</sub>: 30.4, 28.6; **CH**<sub>3</sub>: 41.9, 38.7; IR (thin film): 1155, 1698, 2966 cm<sup>-1</sup>; HRMS-DART (m/z) [M+H]<sup>+</sup> calculated for C<sub>16</sub>H<sub>24</sub>NO<sub>2</sub> = 262.1807; found 262.1793.

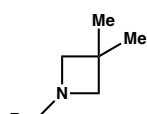

**12d:** C<sub>10</sub>H<sub>19</sub>NO<sub>2</sub>  
MW: 185.27

**tert-Butyl-3,3-dimethylazetidine-1-carboxylate (12d).** The title compound was prepared from **11d** (34 mg, 0.20 mmol) following the General Procedure. After 1 h, the reaction was completed using Workup A. The resulting crude residue was purified by flash chromatography (SiO<sub>2</sub>, 9:1 pentanes/Et<sub>2</sub>O) to afford **12d** (31 mg, 0.17 mmol, 83% yield) as a colorless oil: <sup>1</sup>H NMR (400 MHz, CDCl<sub>3</sub>) δ<sub>H</sub> 3.61 (s, 4H), 1.46 (s, 9H), 1.26 (s, 6H); <sup>13</sup>C NMR (150 MHz, CDCl<sub>3</sub>) δ<sub>C</sub> **C**: 156.9, 79.2, 30.8; **CH**<sub>2</sub>: 61.5; **CH**<sub>3</sub>: 28.6, 27.1; IR (thin film): 1396, 1704, 2924 cm<sup>-1</sup>; HRMS-DART (m/z) [M+H]<sup>+</sup> calculated for C<sub>10</sub>H<sub>20</sub>NO<sub>2</sub> = 186.1494; found 186.1491.

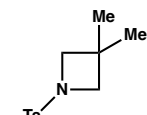

**12e:** C<sub>12</sub>H<sub>17</sub>NO<sub>2</sub>S  
MW: 239.33

**3,3-Dimethyl-1-tosylazetidine (12e).** The title compound was prepared from **11e** (45 mg, 0.20 mmol) following the General Procedure. After 1 h, the reaction was completed using Workup A. The resulting crude residue was purified by flash chromatography (SiO<sub>2</sub>, 9:1 hexanes/EtOAc) to afford **12e** (36 mg, 0.18 mmol, 92% yield) as a yellow oil: <sup>1</sup>H NMR (400 MHz, CDCl<sub>3</sub>) δ<sub>H</sub> 7.72 (d, *J* = 8.0 Hz, 2H), 7.36 (d, *J* = 7.9 Hz, 2H), 3.44 (s, 4H), 2.46 (s, 3H), 1.06 (s, 6H); <sup>13</sup>C NMR (150 MHz, CDCl<sub>3</sub>) δ<sub>C</sub> **C**:



143.8, 131.8, 30.4; **CH**: 129.6, 128.3; **CH<sub>2</sub>**: 62.5; **CH<sub>3</sub>**: 26.6, 21.6 **IR** (thin film): 1229, 1341, 2959  $\text{cm}^{-1}$ ; **HRMS-DART** ( $m/z$ )  $[M+H]^+$  calculated for  $\text{C}_{12}\text{H}_{18}\text{NO}_2\text{S}$  = 240.1058; found 240.1052.

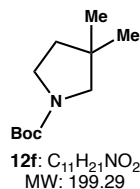

**tert-Butyl-3,3-dimethylpyrrolidine-1-carboxylate (12f)**. The title compound was prepared from **11f** (37 mg, 0.20 mmol) following the General Procedure. After 1 h, the reaction was completed using Workup A. The resulting crude residue was purified by flash chromatography ( $\text{SiO}_2$ , 9:1 hexanes/EtOAc) to afford **12f** (35 mg, 0.17 mmol, 87% yield) as a colorless oil. **12g** was isolated as a mixture of rotational isomers carbamate bond: **<sup>1</sup>H NMR** (400 MHz,  $\text{CDCl}_3$ ) **isomer 1**:  $\delta_H$  3.43 (t,  $J$  = 6.9 Hz, 2H), 3.11 (br s, 2H), 1.48 (s, 9H), 1.08 (s, 6H); **isomer 2**:  $\delta_H$  3.38 (t,  $J$  = 6.9 Hz, 1H), 3.05 (br s, 1H), 1.48 (s, 9H), 1.08 (s, 6H). The remaining **<sup>1</sup>H** resonances could not be resolved; **<sup>13</sup>C NMR** (150 MHz,  $\text{CDCl}_3$ ) **isomer 1**:  $\delta_C$  **C**: 154.9, 79.0, 29.7; **CH<sub>2</sub>**: 58.9, 45.2, 39.3; **CH<sub>3</sub>**: 28.6, 26.2; **isomer 2**:  $\delta_C$  **C**: 154.9, 79.0, 29.7; **CH<sub>2</sub>**: 58.3, 44.9, 38.6; **CH<sub>3</sub>**: 28.4, 26.2 **IR** (thin film): 1399, 1699, 2959  $\text{cm}^{-1}$ ; **HRMS-DART** ( $m/z$ )  $[M+H]^+$  calculated for  $\text{C}_{11}\text{H}_{22}\text{NO}_2$  = 200.1651; found 200.1644.

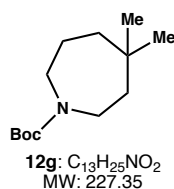

**tert-Butyl-4,4-dimethylazepane-1-carboxylate (12g)**. The title compound was prepared from **11g** (42 mg, 0.20 mmol) following the General Procedure. After 3 h, the reaction was completed using Workup A. The resulting crude residue was purified by flash chromatography ( $\text{SiO}_2$ , 10:1 hexanes/Et<sub>2</sub>O) to afford **12g** (29 mg, 0.16 mmol, 81% yield) as a yellow oil. **12g** was isolated as a mixture of rotational isomers carbamate bond: **<sup>1</sup>H NMR** (400 MHz,  $\text{CDCl}_3$ ) **isomers 1 & 2 are indistinguishable by <sup>1</sup>H NMR**:  $\delta_H$  3.39, (t,  $J$  = 6.0 Hz, 1H), 3.34 (dd,  $J$  = 6.2 Hz, 2H), 3.28 (t,  $J$  = 5.3 Hz, 1H), 1.65 (m, 2H), 1.50 (t,  $J$  = 5.6 Hz, 2H), 1.46 (s, 9H), 1.37 (t,  $J$  = 5.9 Hz, 2H), 0.92 (s, 6H); **<sup>13</sup>C NMR** (150 MHz,  $\text{CDCl}_3$ ) **isomer 1**:  $\delta_C$  **C** 155.7, 78.9, 32.9, 28.2; **CH<sub>2</sub>**: 46.1, 42.6, 41.5, 41.0, 24.1; **CH<sub>3</sub>**: 29.2, 28.5; **isomer 2**:  $\delta_C$  **C** 155.7, 78.9, 32.9, 28.18; **CH<sub>2</sub>**: 45.4, 42.0, 41.1, 40.6, 24.1; **CH<sub>3</sub>**: 29.0, 28.5; **IR** (thin film): 1165, 1692, 2929  $\text{cm}^{-1}$ ; **HRMS-DART** ( $m/z$ )  $[M+H]^+$  calculated for  $\text{C}_{13}\text{H}_{26}\text{NO}_2$  = 228.1964; found 228.1956.

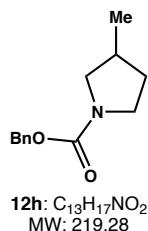

**Benzyl-3-methylpyrrolidine-1-carboxylate (12h)**. The title compound was prepared from **11h** (102 mg, 0.50 mmol) following the General Procedure. After 3 h, the reaction was completed using Workup B. The resulting crude residue was purified by flash chromatography ( $\text{SiO}_2$ , 9:1 hexanes/Et<sub>2</sub>O) to afford **12h** (79 mg, 0.36 mmol, 72% yield) as a yellow oil: **<sup>1</sup>H NMR** (400 MHz,  $\text{CDCl}_3$ )  $\delta_H$  7.44–7.27 (m, 5H), 5.13 (s, 2H), 3.68–3.45 (m, 2H), 3.35 (app. q,  $J$  = 8.0 Hz, 1H), 2.99–2.82 (m, 1H), 2.24 (dt,  $J$  = 14.6, 7.3 Hz, 1H), 2.05–1.91 (m, 1H), 1.57–1.39 (m, 1H), 1.05 (d,  $J$  = 6.6 Hz, 3H). All other characterization data was identical to previously reported values.<sup>25</sup>

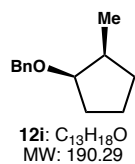

**cis-(((2-Methylcyclopentyl)oxy)methyl)benzene (12i)**. The title compound was prepared from **11i** (86 mg, 0.50 mmol) following the General Procedure. After 3 h, the reaction was completed using Workup B. The resulting crude residue was purified by flash chromatography ( $\text{SiO}_2$ , hexanes) to afford **12i** (56 mg, 0.36 mmol, 60% yield) as an inseparable mixture of proximal ( $\alpha$ ) and distal ( $\beta$ ) isomers (13:1 ratio): **<sup>1</sup>H NMR** (400 MHz,  $\text{CDCl}_3$ )  $\delta_H$  7.41–7.21 (m, 5H), 4.50 (app. q.,  $J$  = 17.8 Hz, 2H) 3.49 (app q,  $J$  = 5.7 Hz, 1H), 2.08–1.97 (m, 1H), 1.96–1.83 (m, 2H), 1.79–1.60 (m, 3H), 1.22–1.11 (dd  $J$  = 12.4, 7.6 Hz, 1H), 1.02 (d,  $J$  = 6.8 Hz, 3H), All other characterization data was identical to previously reported values.<sup>26</sup>

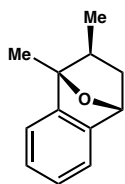

12j: C<sub>12</sub>H<sub>14</sub>O  
MW: 174.24

**cis-1,2-Dimethyl-1,2,3,4-tetrahydro-1,4-epoxynaphthalene (12j).** The title compound was prepared from **11j** (32 mg, 0.20 mmol) following the General Procedure. After 3 h, the reaction was completed using Workup B. The resulting crude residue was purified by flash chromatography (SiO<sub>2</sub>, benzene) to afford **12j** (17 mg, 0.10 mmol, 50% yield) as a yellow oil: <sup>1</sup>H NMR (600 MHz, CDCl<sub>3</sub>) δ<sub>H</sub> 7.25–7.11 (m, 4H), 5.27 (d, *J* = 4.9 Hz, 1H), 1.84–1.68 (m, 5H), 1.64 (ddd, *J* = 10.9, 4.9, 3.5 Hz, 1H), 1.13 (d, *J* = 6.7 Hz, 3H); <sup>13</sup>C NMR (150 MHz, CDCl<sub>3</sub>) δ<sub>C</sub> C: 149.0, 146.7, 78.1; CH: 126.4, 126.2, 118.5, 117.6, 87.0, 38.7; CH<sub>2</sub>: 36.3; CH<sub>3</sub>: 17.6, 14.2; IR (thin film): 3048, 2958, 1363 cm<sup>-1</sup>. HRMS-ESI (*m/z*) [M+H]<sup>+</sup> calculated for C<sub>12</sub>H<sub>15</sub>O = 175.1123; found 175.1126.

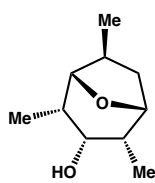

12k: C<sub>10</sub>H<sub>18</sub>O<sub>2</sub>  
MW: 170.25

**2,4,6-trimethyl-8-oxabicyclo[3.2.1]octan-3-ol (12k).** The title compound was prepared from **11k** (30 mg, 0.20 mmol) following the General Procedure. After 3 h, the reaction was completed using Workup B. The resulting crude residue was purified by flash chromatography (SiO<sub>2</sub>, 10:1 benzene/Et<sub>2</sub>O) to afford **12k** (16 mg, 0.09 mmol, 47%) as a yellow oil: <sup>1</sup>H NMR (600 MHz, CDCl<sub>3</sub>) δ<sub>H</sub> 4.05 (dd, *J* = 7.4, 3.3 Hz, 1H), 3.71 (br s, 1H), 3.55 (d, *J* = 3.2 Hz, 1H), 2.64–2.55 (m, 1H), 2.41 (dd, *J* = 12.1, 8.6 Hz, 1H), 2.05–1.96 (m, 2H), 1.25–1.19 (m, 1H), 1.04 (d, *J* = 7.1 Hz, 3H), 0.99 (d, *J* = 7.3 Hz, 3H), 0.95 (d, *J* = 7.3 Hz, 3H); <sup>13</sup>C NMR (150 MHz, CDCl<sub>3</sub>) δ<sub>C</sub> CH: 85.4, 79.2, 71.9, 38.9, 31.9, 29.7; CH<sub>2</sub>: 34.5; CH<sub>3</sub>: 23.4, 12.9, 12.8. IR (thin film): 3446 (br), 2930, 2871 cm<sup>-1</sup>; HRMS-ESI (*m/z*) [M+H]<sup>+</sup> calculated for C<sub>10</sub>H<sub>19</sub>O<sub>2</sub> = 171.1139; found 171.1141.

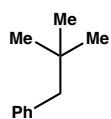

12l: C<sub>11</sub>H<sub>16</sub>  
MW: 148.25

**Neopentylbenzene (12l).** The title compound was prepared from **11l** (59 mg, 0.50 mmol) following a modification of General Procedure employing 2.0 equiv of **1** at –10°C. After 3 h, the reaction was completed using Workup C. The resulting crude residue consisting of an inseparable mixture of **11l** and **12l** was dissolved in CH<sub>2</sub>Cl<sub>2</sub> (3 mL) and treated with *m*-CBPA (34 mg, 0.20 mmol) at rt. After 2 h, the reaction mixture was filtered over a pad of Celite and concentrated under reduced pressure. The resulting residue was purified by flash chromatography (SiO<sub>2</sub>, 99:1 pentane/Et<sub>2</sub>O) to afford **12l** (45 mg, 0.31 mmol, 61% yield) as a colorless oil: <sup>1</sup>H NMR (400 MHz, CDCl<sub>3</sub>) δ<sub>H</sub> 7.28–7.11 (m, 5H), 2.50 (s, 2H), 0.90 (s, 9H). All other characterization data was identical to previously reported values.<sup>27</sup>

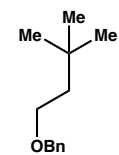

12m: C<sub>13</sub>H<sub>20</sub>O  
MW: 192.30

**((3,3-Dimethylbutoxy)methyl)benzene (12m).** The title compound was prepared from **11m** (53 mg, 0.20 mmol) following a modification of General Procedure employing 2.0 equiv of **1** at –10°C. After 3 h, the reaction was completed using Workup C. The resulting crude residue consisting of an inseparable mixture of **11m** and **12m** was dissolved in CH<sub>2</sub>Cl<sub>2</sub> (3 mL) and treated with *m*-CBPA (34 mg, 0.20 mmol) at rt. After 2 h, the reaction mixture was filtered over a pad of Celite and concentrated under reduced pressure. The resulting residue was purified by flash chromatography (SiO<sub>2</sub>, benzene) to afford **12m** (42 mg, 0.15 mmol, 75% yield) as a colorless oil: δ<sub>H</sub> 7.40–7.33 (m, 4H), 7.33–7.29 (m, 1H), 4.52 (s, 2H), 3.57 (t, *J* = 7.5 Hz, 2H), 1.61 (t, *J* = 7.7 Hz, 2H), 0.95 (s, 9H). All other characterization data was identical to previously reported values.<sup>28</sup>

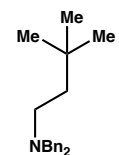

12n: C<sub>20</sub>H<sub>27</sub>N  
MW: 281.44

***N,N*-Dibenzyl-3,3-dimethylbutan-1-amine (12n).** The title compound was prepared from **11n** (53 mg, 0.20 mmol) following a modification of General Procedure employing 2.0 equiv of **1** at –10°C. After 3 h, the reaction was completed using Workup C. The resulting crude residue consisting of an inseparable mixture of **11n** and **12n** (1:3 ratio, 34 mg of **12n**, 0.12 mmol, est. 61% yield based on NMR). An analytical sample of **12n** was prepared by pTLC (benzene): <sup>1</sup>H NMR (400 MHz, CDCl<sub>3</sub>) δ<sub>H</sub> 7.40–7.25 (m, 10H),

3.59 (s, 4H), 2.47 (app t,  $J = 8.0$  Hz, 2H), 1.49 (app t,  $J = 7.9$  Hz, 2H), 0.84 (s, 9H);  $^{13}\text{C NMR}$  (150 MHz,  $\text{CDCl}_3$ )  $\delta_{\text{C}}$  **C**: 140.1, 29.9; **CH<sub>2</sub>**: 58.2, 49.3, 40.32; **CH<sub>3</sub>**: 29.5; **IR** (thin film): 3078, 2958  $\text{cm}^{-1}$ ; **HRMS-ESI** ( $m/z$ ) [ $\text{M}+\text{H}$ ] $^+$  calculated for  $\text{C}_{20}\text{H}_{28}\text{N} = 282.2222$ ; found 282.2224.

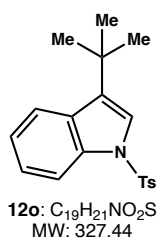

**3-(tert-Butyl)-1-tosyl-1H-indole (12o)**. The title compound was prepared from **11o** (62 mg, 0.20 mmol) following a modification of General Procedure employing 2.0 equiv of **1** at  $-10^\circ\text{C}$ . After 3 h, the reaction was completed using Workup C. The resulting crude residue consisting of an inseparable mixture of **11o** and **12o** was dissolved in  $\text{CH}_2\text{Cl}_2$  (3 mL) and treated with *m*-CBPA (34 mg, 0.20 mmol) at rt. After 2 h, the reaction mixture was filtered over a pad of Celite and concentrated under reduced pressure. The resulting residue was purified by flash chromatography ( $\text{SiO}_2$ , 4:1 pentanes/ $\text{Et}_2\text{O}$ ) to afford **12o** (29 mg, 0.09 mmol, 44% yield) as a colorless oil:  $^1\text{H NMR}$  (400 MHz,  $\text{CDCl}_3$ )  $\delta_{\text{H}}$  7.98 (d,  $J = 8.1$  Hz, 1H), 7.74 (d,  $J = 8.3$  Hz, 2H), 7.70 (d,  $J = 7.9$  Hz, 1H), 7.27 (m, 2H), 7.21 (d,  $J = 8.0$  Hz, 3H), 2.34 (s, 3H), 1.40 (s, 9H).  $^{13}\text{C NMR}$  (150 MHz,  $\text{CDCl}_3$ )  $\delta_{\text{C}}$  **C**: 144.8, 136.2, 135.6, 132.8, 129.8, 32.0; **CH**: 129.9, 126.9, 124.1, 122.7, 122.0, 121.2; **CH<sub>3</sub>**: 30.3, 21.7; **IR** (thin film): 1172, 1367, 2960  $\text{cm}^{-1}$ ; **HRMS-DART** ( $m/z$ ) [ $\text{M}+\text{H}$ ] $^+$  calculated for  $\text{C}_{19}\text{H}_{22}\text{NO}_2\text{S} = 328.1371$ ; found 327.1395.

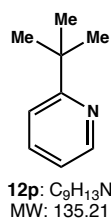

**2-(tert-Butyl)pyridine (12p)**. The title compound was prepared from **11p** (60 mg, 0.50 mmol) following a modification of General Procedure employing 2.0 equiv of **1** at  $-10^\circ\text{C}$ . After 3 h, the reaction was completed using Workup C. The resulting residue was purified by flash chromatography ( $\text{SiO}_2$ , pentanes) to afford **12p** (55 mg, 0.41 mmol, 81% yield) as a colorless oil:  $^1\text{H NMR}$  (400 MHz,  $\text{CDCl}_3$ )  $\delta_{\text{H}}$  8.57 (d,  $J = 3.9$  Hz, 1H), 7.61 (td,  $J = 7.7, 1.9$  Hz, 1H), 7.34 (d,  $J = 8.0$  Hz, 1H), 7.08 (ddd,  $J = 7.0, 4.9, 0.9$  Hz, 1H), 1.37 (s, 9H). All other characterization data was identical to previously reported values.<sup>29</sup>

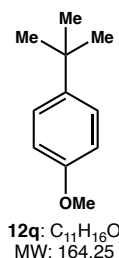

**1-(tert-Butyl)-4-methoxybenzene (12q)**. The title compound was prepared from **11q** (74 mg, 0.50 mmol) following a modification of General Procedure employing 2.0 equiv of **1** at  $-10^\circ\text{C}$ . After 3 h, the reaction was completed using Workup C. The resulting crude residue consisting of an inseparable mixture of **11q** and **12q** was dissolved in  $\text{CH}_2\text{Cl}_2$  (3 mL) and treated with *m*-CBPA (34 mg, 0.20 mmol) at rt. After 2 h, the reaction mixture was filtered over a pad of Celite and concentrated under reduced pressure. The resulting residue was purified by flash chromatography ( $\text{SiO}_2$ , 10:1 pentanes/ $\text{Et}_2\text{O}$ ) to afford **12q** (31 mg, 0.19 mmol, 38% yield) as a yellow oil:  $^1\text{H NMR}$  (400 MHz,  $\text{CDCl}_3$ )  $\delta_{\text{H}}$  7.31 (d,  $J = 8.8$  Hz, 2H), 6.85 (d,  $J = 9.2$  Hz, 2H), 3.80 (s, 3H), 1.30 (s, 9H). All other characterization data was identical to previously reported values.<sup>30</sup>

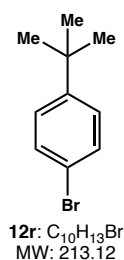

**1-(tert-Butyl)-4-bromobenzene (12r)**. The title compound was prepared from **11r** (98 mg, 0.50 mmol) following a modification of General Procedure employing 2.0 equiv of **1** at  $-10^\circ\text{C}$ . After 3 h, the reaction was completed using Workup C. The resulting crude residue consisting of an inseparable mixture of **11r** and **12r** was dissolved in  $\text{CH}_2\text{Cl}_2$  (3 mL) and treated with *m*-CBPA (34 mg, 0.20 mmol) at rt. After 2 h, the reaction mixture was filtered over a pad of Celite and concentrated under reduced pressure. The resulting residue was purified by flash chromatography ( $\text{SiO}_2$ , pentanes) to afford **12r** (65 mg, 0.31 mmol, 61% yield) as a colorless oil:  $^1\text{H NMR}$  (400 MHz,  $\text{CDCl}_3$ )  $\delta_{\text{H}}$  7.43 (dd,  $J = 8.5, 4.7$  Hz, 2H), 7.32–7.25 (m, 2H), 1.32 (s, 9H). All other characterization data was identical to previously reported values.<sup>31</sup>

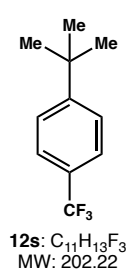

**1-(tert-Butyl)-4-trifluoromethyl-benzene (12s).** The title compound was prepared from **11s** (93 mg, 0.50 mmol) following a modification of General Procedure employing 2.0 equiv of **1** at  $-10^{\circ}\text{C}$ . After 3 h, the reaction was completed using Workup C. The resulting crude residue consisting of an inseparable mixture of **11s** and **12s** was dissolved in  $\text{CH}_2\text{Cl}_2$  (3 mL) and treated with *m*-CBPA (34 mg, 0.20 mmol) at rt. After 2 h, the reaction mixture was filtered over a pad of Celite and concentrated under reduced pressure. The resulting residue was purified by flash chromatography ( $\text{SiO}_2$ , pentanes) to afford **12s** (76 mg, 0.35 mmol, 70% yield) as a colorless oil:  $^1\text{H NMR}$  (400 MHz,  $\text{CDCl}_3$ )  $\delta_{\text{H}}$  7.52 (dd,  $J = 10.7$  Hz, 2H), 1.37 (s, 9H). All other characterization data was identical to previously reported values.<sup>32</sup>

#### Data for structures Scheme 4

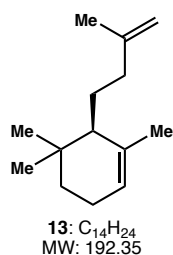

**1,5,5-Trimethyl-6-(3-methylbut-3-en-1-yl)-cyclohex-1-ene (13).** The title compound was prepared from **S1** using the protocol described by Shoenebeck.<sup>33</sup>  $^1\text{H NMR}$  (400 MHz,  $\text{CDCl}_3$ )  $\delta_{\text{H}}$  5.32 (s, 1H), 4.70 (s, 1H), 4.69 (s, 1H), 2.09–2.04 (m, 2H), 2.01–1.96 (m, 2H), 1.75 (s, 3H), 1.71 (s, 3H), 1.63–1.54 (m, 2H), 1.49–1.40 (m, 2H), 1.17–1.11 (m, 1H), 0.95 (s, 3H), 0.90 (s, 3H). All other characterization data was identical to reported values.<sup>33</sup>

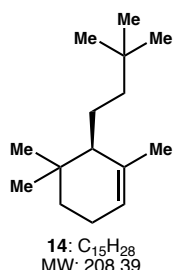

**6-(3,3-Dimethylbutyl)-1,5,5-trimethylcyclohex-1-ene (14).** The title compound was prepared from **13** (96 mg, 0.50 mmol) following a modification of General Procedure employing 2.0 equiv of **1** at  $-10^{\circ}\text{C}$ . After 3 h, the reaction was completed using Workup C. The resulting crude residue was purified by flash chromatography ( $\text{SiO}_2$ , 20:1 hexanes/ $\text{Et}_2\text{O}$ ) to afford an inseparable mixture of **14** and unreacted **13** (3:1 ratio, 73% yield combined, 40% yield of **14**). An analytical sample of **14** was prepared by pTLC (benzene):  $^1\text{H NMR}$  (600 MHz,  $\text{CDCl}_3$ )  $\delta_{\text{H}}$  5.29 (s, 1H), 2.04–1.97 (m, 2H), 1.68 (s, 3H), 1.69 (app d,  $J = 13.7$  Hz, 2H), 1.53–1.38 (m, 2H), 1.33–1.19 (m, 4H), 1.16–1.09 (d,  $J = 12.3$  Hz, 1H), 0.93 (s, 6H), 0.89 (s, 9H).  $^{13}\text{C NMR}$  (150 MHz,  $\text{CDCl}_3$ )  $\delta_{\text{C}}$  **C**: 137.2, 31.7, 30.7; **CH**: 119.5, 31.8; **CH<sub>2</sub>**: 49.8, 29.3, 27.7, 27.5; **CH<sub>3</sub>**: 44.9, 25.9, 23.0; **IR** (thin film): 3073, 2868, 1508  $\text{cm}^{-1}$ ; **HRMS-ESI** ( $m/z$ ) [ $\text{M}+\text{H}$ ]<sup>+</sup> calculated for  $\text{C}_{15}\text{H}_{29} = 209.2269$ ; found 209.2271.

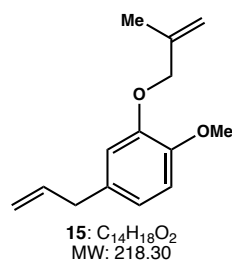

**4-Allyl-1-methoxy-2-((2-methylallyl)oxy)benzene (15).** The title compound was prepared from eugenol using the protocol described by Shoenebeck.<sup>33</sup>  $^1\text{H NMR}$  (400 MHz,  $\text{CDCl}_3$ )  $\delta_{\text{H}}$  6.80 (d,  $J = 8.0$  Hz, 1H), 6.79 (s, 1H), 6.68 (d,  $J = 8.1$  Hz, 1H), 6.01–5.88 (m, 1H), 5.11–5.01 (m, 2H), 4.96 (br s, 1H), 4.49 (s, 2H), 3.86 (s, 3H), 3.32 (d,  $J = 6.64$  Hz, 2H), 1.82 (s, 3H). All other characterization data was identical to reported values.

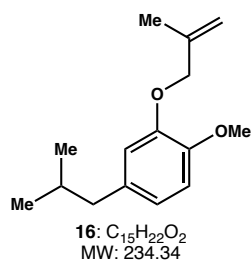

**4-isobutyl-1-methoxy-2-((2-methylallyl)oxy)benzene (16).** The title compound was prepared from **15** (44 mg, 0.20 mmol) following the General Procedure. After 6 h, the reaction was completed using Workup C. The resulting crude residue was purified by flash chromatography (SiO<sub>2</sub>, hexanes) to afford **16** (40 mg, 0.17 mmol, 84% yield) as a 15:1 mixture of branched and linear regioisomers. The major (branched) regioisomer was characterized: <sup>1</sup>H NMR (600 MHz, CDCl<sub>3</sub>) δ<sub>H</sub> 6.78 (d, *J* = 8.1 Hz, 1H), 6.67 (s, 1H), 6.62 (d, *J* = 8.2 Hz, 1H), 5.08 (br s, 1H), 4.96 (br s, 1H), 4.48 (s, 2H), 3.86 (s, 3H), 2.40 (d, *J* = 7.2 Hz, 1H), 1.88–1.75 (m, 4H), 0.89 (d, *J* = 6.6 Hz, 1H); <sup>13</sup>C NMR (150 MHz, CDCl<sub>3</sub>) δ<sub>C</sub>: 149.2, 146.3, 141.2, 134.8; **CH**: 121.0, 113.6, 113.0, 19.4; **CH**<sub>2</sub>: 112.5, 72.9, 45.1; **CH**<sub>3</sub>: 56.0, 30.3, 22.4; **IR** (thin film): 3084, 2943, 1108 cm<sup>-1</sup>; **HRMS-ESI** (*m/z*) [M+H]<sup>+</sup> calculated for C<sub>15</sub>H<sub>23</sub>O<sub>2</sub> = 235.1698; found 235.1699.

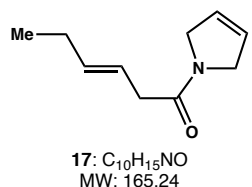

**(E)-1-(2,5-dihydro-1H-pyrrol-1-yl)hex-3-en-1-one (17).** A solution of (*E*)-3-hexenoic acid (0.1 mL, 1 mmol) in CH<sub>2</sub>Cl<sub>2</sub> (3 mL) was treated sequentially with Et<sub>3</sub>N (0.3 mL, 2 mmol), HATU (370 mg, 1.20 mmol) and 3-pyrroline (0.1 mL, 1 mmol) at rt. After 18 h, the reaction mixture was treated with water (10 mL) and transferred to a separatory funnel with CH<sub>2</sub>Cl<sub>2</sub> (10 mL). The mixture was extracted with CH<sub>2</sub>Cl<sub>2</sub> (3 x 10 mL). The combined organic extracts were washed with water (2 x 10 mL) and brine (10 mL), dried over MgSO<sub>4</sub>, filtered and concentrated under reduced pressure. The resulting crude residue was purified by flash chromatography (SiO<sub>2</sub>, 2:1 PhH/EtOAc) to afford **17** (126 mg, 0.76 mmol, 76% yield) as a colorless oil: <sup>1</sup>H NMR (400 MHz, CDCl<sub>3</sub>) δ<sub>H</sub> 5.89 (d, *J* = 6.0 Hz, 1H), 5.81 (d, *J* = 6.0 Hz, 1H), 5.67–5.53 (m, 2H), 4.27 (s, 4H), 3.05 (d, *J* = 4.8 Hz, 2H), 2.13–2.02 (m, 2H), 1.01 (t, *J* = 7.4 Hz, 3H). <sup>13</sup>C NMR (150 MHz, CDCl<sub>3</sub>) δ<sub>C</sub>: 170.1; **CH**: 135.9, 126.4, 124.9, 121.2; **CH**<sub>2</sub>: 53.4, 53.1, 38.8, 25.6; **CH**<sub>3</sub>: 13.6; **IR**: 2926, 1618, 1358. **HRMS-DART** (*m/z*) [M+1] calculated for C<sub>10</sub>H<sub>16</sub>NO = 166.1232; found 166.1232.

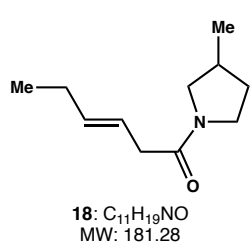

**(E)-1-(3-methylpyrrolidin-1-yl)hex-3-en-1-one (18).** The title compound was prepared from **17** (83 mg, 0.50 mmol) following the General Procedure. After 3 h, the reaction was completed using Workup C. The resulting crude residue was purified by flash chromatography (SiO<sub>2</sub>, 6:1 hexanes/EtOAc) to afford **18** (62 mg, 0.34 mmol, 68% yield) as a 1:1 mixture of isomers about the amide bond: <sup>1</sup>H NMR (600 MHz, CDCl<sub>3</sub>) **isomer 1**, δ<sub>H</sub> 3.68 (dd, *J* = 11.8, 7.3 Hz, 1H), 3.62 (dddd, *J* = 12.1, 7.9, 3.3, 0.5 Hz, 1H), 2.29 (app. sext, *J* = 7.0 Hz, 1H), 1.56 (qd, 12.3, 8.6 Hz, 1H), 1.06 (d, *J* = 6.9 Hz, 3H); **isomer 2**, δ<sub>H</sub> 3.57 (dd, *J* = 9.5, 7.3 Hz, 1H), 3.55–3.49 (m, 1H), 2.20 (app. sext, *J* = 7.0 Hz, 1H), 1.45 (qd, 12.3, 8.6 Hz, 1H), 1.05 (d, *J* = 6.9 Hz, 3H); remaining <sup>1</sup>H resonances could not be resolved.; <sup>13</sup>C NMR (150 MHz, CDCl<sub>3</sub>) δ<sub>C</sub> **isomer 1**, δ<sub>C</sub>: 170.1; **CH**: 135.4, 121.7, 34.0; **CH**<sub>2</sub>: 54.0, 46.4, 39.1, 32.3, 25.6; **CH**<sub>3</sub>: 17.7, 13.6; **isomer 2**, δ<sub>C</sub>: 170.1; **CH**: 135.4, 121.7, 33.9; **CH**<sub>2</sub>: 52.7, 45.5, 38.9, 32.1, 25.6; **CH**<sub>3</sub>: 17.6, 13.6 **IR**: 2936, 1641, 1438. **HRMS-ESI** (*m/z*) [M+H]<sup>+</sup> calculated for C<sub>11</sub>H<sub>20</sub>NO = 182.1545; found 182.1545.

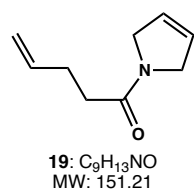

**1-(2,5-dihydro-1H-pyrrol-1-yl)pent-4-en-1-one (19).** A solution of 4-pentenoic acid (200 mg, 2.00 mmol) in CH<sub>2</sub>Cl<sub>2</sub> (6 mL) was treated sequentially with Et<sub>3</sub>N (0.6 mL, 4 mmol), HATU (740 mg, 2.40 mmol) and 3-pyrroline (0.2 mL, 2 mmol) at rt. After 18 h, the reaction mixture was treated with water (20 mL) and transferred to a separatory funnel with CH<sub>2</sub>Cl<sub>2</sub> (20 mL). The mixture was extracted with CH<sub>2</sub>Cl<sub>2</sub> (3 x 20 mL). The combined organic extracts were washed with water (2 x 20 mL) and brine (20 mL), dried over MgSO<sub>4</sub>, filtered and concentrated under reduced pressure. The resulting crude residue was purified by flash chromatography (SiO<sub>2</sub>, 4:1

hexanes/EtOAc) to afford **19** (257 mg, 1.70 mmol, 85% yield) as a colorless oil:  $^1\text{H NMR}$  (600 MHz,  $\text{CDCl}_3$ )  $\delta_{\text{H}}$  5.99–5.85 (m, 2H), 5.81 (d,  $J = 6.1$  Hz, 1H), 5.08 (d,  $J = 17.1$  Hz, 1H), 5.01 (d,  $J = 10.2$  Hz, 1H), 4.26 (s, 4H), 2.50–2.33 (m, 4H);  $^{13}\text{C NMR}$  (150 MHz,  $\text{CDCl}_3$ )  $\delta_{\text{C}}$  **C**: 171.0; **CH**: 137.6, 126.5, 124.8; **CH<sub>2</sub>**: 115.2, 53.3, 52.9, 33.65, 28.8; **IR** (thin film): 3008, 2870, 1655  $\text{cm}^{-1}$ ; **HRMS-DART** ( $m/z$ )  $[\text{M}+\text{H}]^+$  calculated for  $\text{C}_9\text{H}_{14}\text{NO} = 152.1075$ ; found 152.1068.

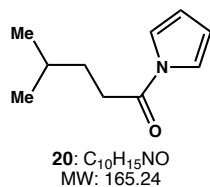

**4-Methyl-1-(1H-pyrrol-1-yl)pentan-1-one (20)**. The title compound was prepared from **19** (76 mg, 0.50 mmol) following the General Procedure. After 3 h, the reaction was completed using Workup C. The resulting crude residue was digested in  $\text{CHCl}_3$  (3 mL) and stirred under a balloon of  $\text{O}_2$  (1 atm). After 16 h, the mixture was concentrated and purified by flash chromatography ( $\text{SiO}_2$ , 9:1 hexanes/EtOAc) to afford **20** (59 mg, 0.36 mmol, 72% yield) as a yellow oil:  $^1\text{H NMR}$  (600 MHz,  $\text{CDCl}_3$ )  $\delta_{\text{H}}$  7.35 (br s, 2H), 6.33 (app t,  $J = 2.3$  Hz, 2H), 2.85 (app t,  $J = 8.4$  Hz, 2H), 1.72–1.60 (m, 2H), 1.43–1.34 (m, 1H) 0.98 (d,  $J = 6.3$  Hz, 6H);  $^{13}\text{C NMR}$  (150 MHz,  $\text{CDCl}_3$ )  $\delta_{\text{C}}$  **C**: 171.0; **CH**: 119.0, 113.0, 27.7; **CH<sub>2</sub>**: 33.4, 32.6, **CH<sub>3</sub>**: 22.3; **IR**: 2963, 1641, 1438. **HRMS-DART** ( $m/z$ )  $[\text{M}+\text{H}]^+$  calculated for  $\text{C}_{10}\text{H}_{15}\text{NO} = 165.1154$ ; found 165.1155.

## 6. References

- (1) Abd Rabo Moustafa, M. M.; Pagenkopf, B. L. *Org. Lett.* **2010**, *12*, 3168–3171.
- (2) Alacid, E.; Najera, C. *Org. Lett.* **2008**, *10*, 5011–5014.
- (3) Xu, Y.-C.; Kohlman, D. T.; Liang, S.X.; Eriksson, C. *Org. Lett.* **1999**, *1*, 1599–1602.
- (4) Davis, B. G.; Maughan, M. A. T.; Champman, T. M.; Villard, R.; Courtney, S. *Org. Lett.* **2002**, *4*, 103–106.
- (5) Crotti, P.; Dussolo, V. D.; Favero, L.; Macchia, F.; Pinechi, M. *Eur. J. Org. Chem.* **1998**, 1675–1686.
- (6) Zhou, H.; Li, J.; Yang, H.; Xia, C.; Jiang, G. *Org. Lett.* **2015**, *17*, 4628–4631.
- (7) Yadav, J.S.; Hossain, S.; Madhu, M.; Mohapatra, D.K. *J. Org. Chem.* **2009**, *74*, 8822–8825.
- (8) Cleary, P. A.; Woerpel, K. A. *Org. Lett.* **2005**, *7*, 5531–5533.
- (9) (a) Zhang, M.-M.; Liu, F. *Org. Chem. Front.* **2018**, *5*, 3343–3347; (b) Lux, M.; Klussmann, M. *Org. Lett.* **2020**, *22*, 3697–3701.
- (10) Baker, B. A.; Boskovic, Z. C.; Lipshutz, B. H. *Org. Lett.* **2008**, *10*, 289–292.
- (11) Cannizzo, L. F.; Grubbs, R. H. *J. Org. Chem.* **1985**, *50*, 2386–2387.
- (12) The synthesis and characterization data for **2** will be reported as part of a separate manuscript that is currently in progress.
- (13) Romanov-Michailidis, F.; Sedillo, K.F.; Neely, J.M.; Rovis, T. *J. Am. Chem. Soc.* **2015**, *137*, 8892–8895.
- (14) Siu, J.C.; Parry, J.B.; Lin, S. *J. Am. Chem. Soc.* **2019**, *141*, 2825–2831.
- (15) Matos, J.L.M.; Vásquez Céspedes, S.; Gu, J.; Oguma, T.; Shenvi, R.A. *J. Am. Chem. Soc.* **2018**, *140*, 16976–16981.
- (16) Green, S.A.; Vásquez-Céspedes, S.; Shenvi, R.A. *J. Am. Chem. Soc.* **2018**, *140*, 11317–11324.
- (17) Tran, N.C.; Dhondt, H.; Flipo, M.; Deprez, B.; Willand, N. *Tetrahedron Lett.* **2015**, *56*, 4119–4123.
- (18) Watson, D.W.; Gill, M.; Kemmitt, P.; Lamont, S.G.; Popescu, M.V.; Simpson, I. *Tetrahedron Lett.* **2018**, *59*, 4479–4482.
- (19) Zhang, C.; Li, Z.; Zhu, L.; Yu, L.; Wang, Z.; Li, C. *J. Am. Chem. Soc.* **2013**, *135*, 14082–14085.
- (20) Stakem, F. G.; Heck, R. F. *J. Org. Chem.* **1980**, *45*, 3584–3593.
- (21) Fukuyama, T.; Nishikawa, T.; Yamada, K.; Ravelli, D.; Fagnoni, M. I. Ryu, I. *Org. Lett.*, **2017**, *19*, 6436–6439.
- (22) Zhao, C.; Sojda, C. A.; Seidel, D. *J. Am. Chem. Soc.*, **2017**, *139*, 10224–10227.
- (23) Baldwin, J. *Tetrahedron Lett.* **1986**, *42*, 4235–4236.

- (24) Khrimian, A. P.; DeMilo, A. B.; Waters, R. M.; Cunningham, R. T.; Leonhardt, B. A. *J. Chem. Ecol.* **1993**, *19*, 2935–2946.
- (25) Xue, W.; Xu, H.; Liang, Z.; Qian, Q.; Gong, H. *Org. Lett.* **2014**, *16*, 4984–4987.
- (26) Molander, G. A.; Hoberg, J. O. *J. Am. Chem. Soc.*, **1992**, *114*, 3123–3125.
- (27) Furstner, A.; Martin, R.; Krause, H.; Seidel, G.; Goddard, R.; Lehmann, C.W. *J. Am. Chem. Soc.* **2008**, *130*, 8773–8787.
- (28) Urgnoitia, G.; SanMartin, R.; Herrero, M. T.; Domigues, E. *Adv. Synth. & Catalysis*, **2016**, *358*, 3307–3312.
- (29) Mita, T.; Michigami, K.; Sato, Y. *Chem. Asian. J.* **2013**, *8*, 2970–2973.
- (30) Cheung, C. W.; Buchwald, S. L. *Org. Lett.* **2013**, *15*, 3998–4001.
- (31) Patra, T.; Mukherjee, S.; Ma, J.; Strieth-Kalthoff, F.; Glorius, F. *Angew. Chem. Int. Ed.* **2019**, *58*, 10514–10520.
- (32) Huang, Y.; Fang, X.; Lin, X.; Li, H.; He, W.; Huang, K.-W.; Yuan, Y.; Weng, Z. *Tetrahedron* **2012**, *68*, 9949–9953.
-



NAME JAL8077B' 1H  
 EXPNO 1  
 PROCNO 1  
 Date\_ 20200103  
 Time 18.46 h  
 INSTRUM spect  
 PROBHD Z108618\_0106 (  
 PULPROG zg30  
 TD 65536  
 SOLVENT CDCl3  
 NS 16  
 DS 2  
 SWH 8012.820 Hz  
 FIDRES 0.244532 Hz  
 AQ 4.0894966 sec  
 RG 161  
 DW 62.400 usec  
 DE 16.92 usec  
 TE 295.7 K  
 D1 1.00000000 sec  
 TD0 1  
 SFO1 400.1724710 MHz  
 NUC1 1H  
 P0 5.00 usec  
 P1 15.00 usec  
 SI 65536  
 SF 400.1700055 MHz  
 WDW EM  
 SSB 0  
 LB 0.30 Hz  
 GB 0  
 PC 1.00

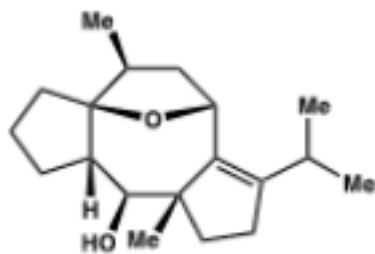

**3: C<sub>19</sub>H<sub>30</sub>O<sub>2</sub>**  
**MW: 290.45**

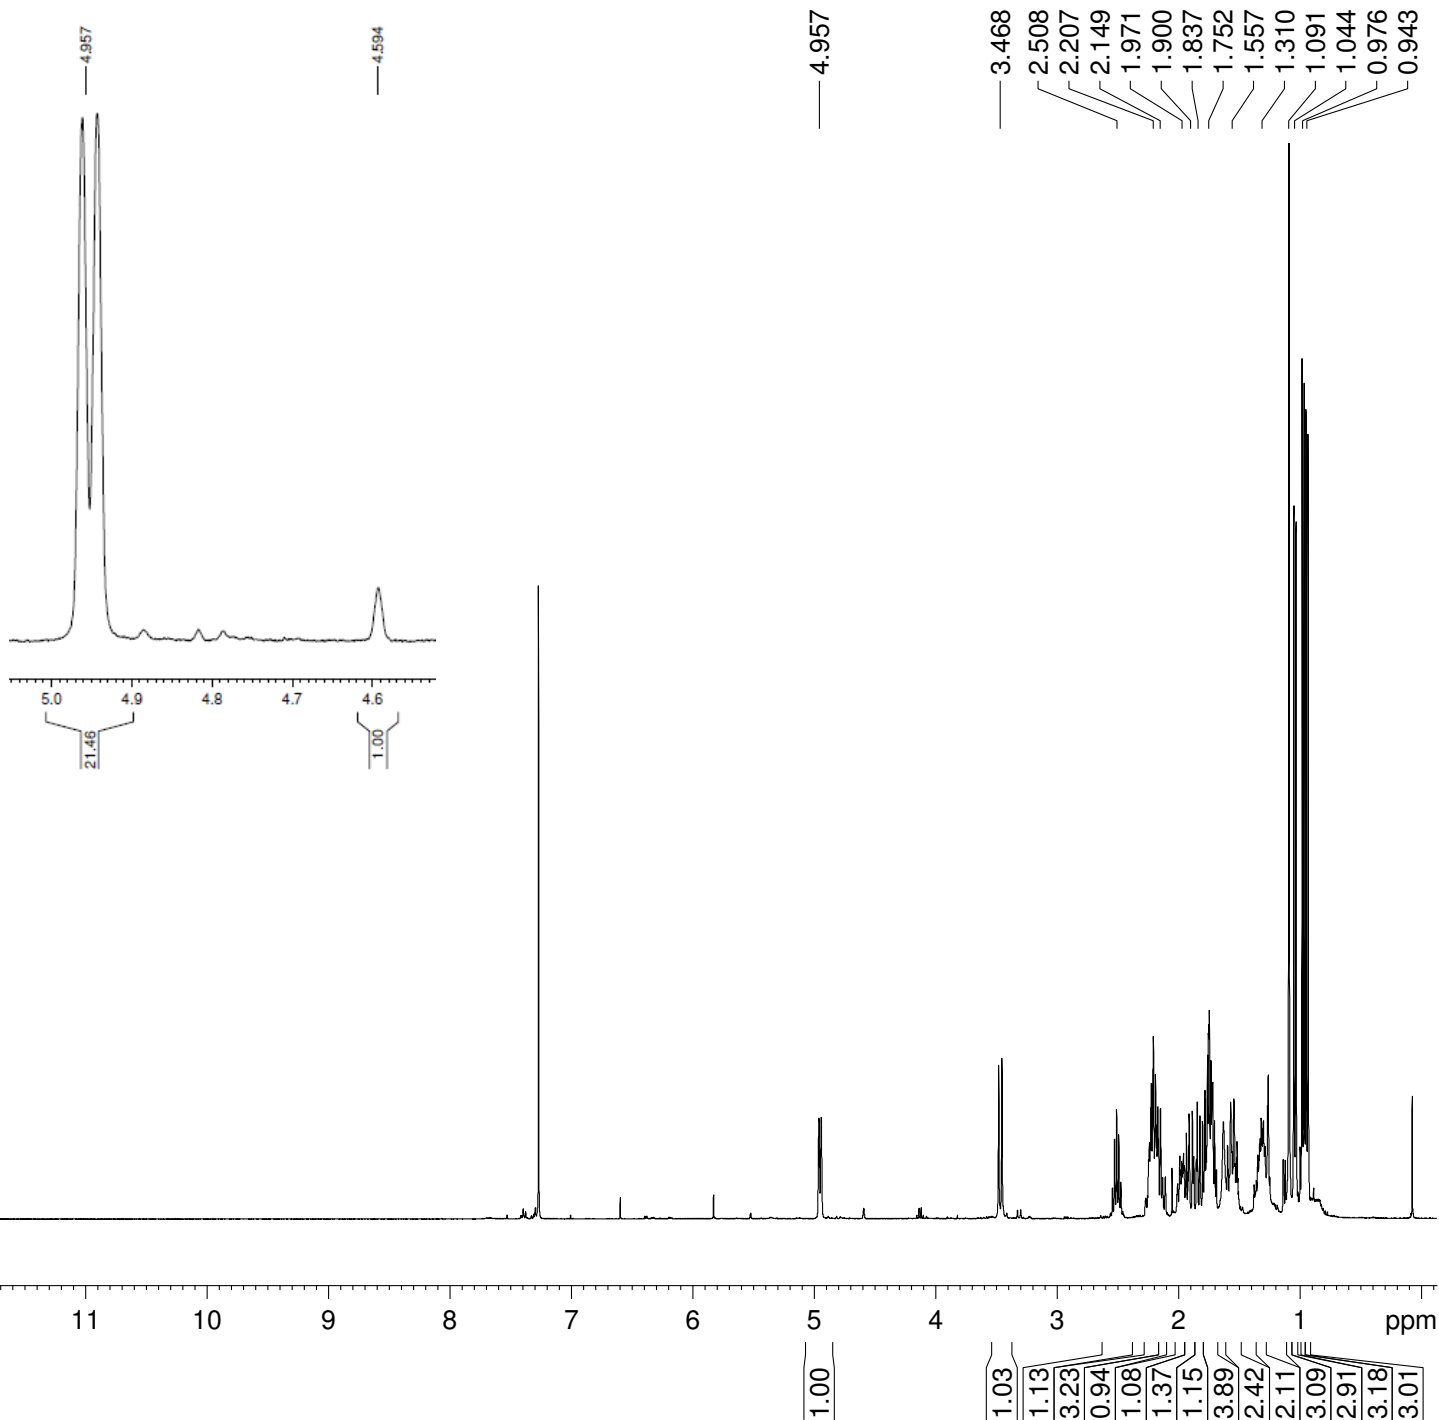

NAME JAL 5-8-5 methyl-THF batch 1A 13C  
 EXPNO 1  
 PROCNO 1  
 Date\_ 20210216  
 Time 20.54 h  
 INSTRUM spect  
 PROBHD Z108618\_0106 (  
 PULPROG zgpg30  
 TD 65536  
 SOLVENT CDCl3  
 NS 50  
 DS 4  
 SWH 24038.461 Hz  
 FIDRES 0.733596 Hz  
 AQ 1.3631988 sec  
 RG 203  
 DW 20.800 usec  
 DE 6.50 usec  
 TE 298.2 K  
 D1 2.00000000 sec  
 D11 0.03000000 sec  
 TD0 1  
 SFO1 100.6328888 MHz  
 NUC1 13C  
 P0 3.53 usec  
 P1 10.60 usec  
 SI 32768  
 SF 100.6228280 MHz  
 WDW EM  
 SSB 0  
 LB 1.00 Hz  
 GB 0  
 PC 1.40

141.71  
141.40

90.86

79.44

75.14

55.60

52.29

46.05

38.17

32.84

31.65

26.92

26.59

25.66

20.95

20.65

18.74

18.59

17.14

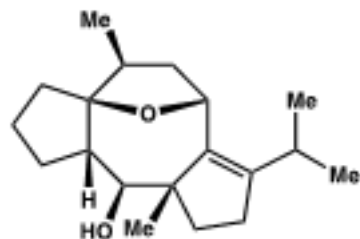

**3: C<sub>19</sub>H<sub>30</sub>O<sub>2</sub>**  
**MW: 290.45**

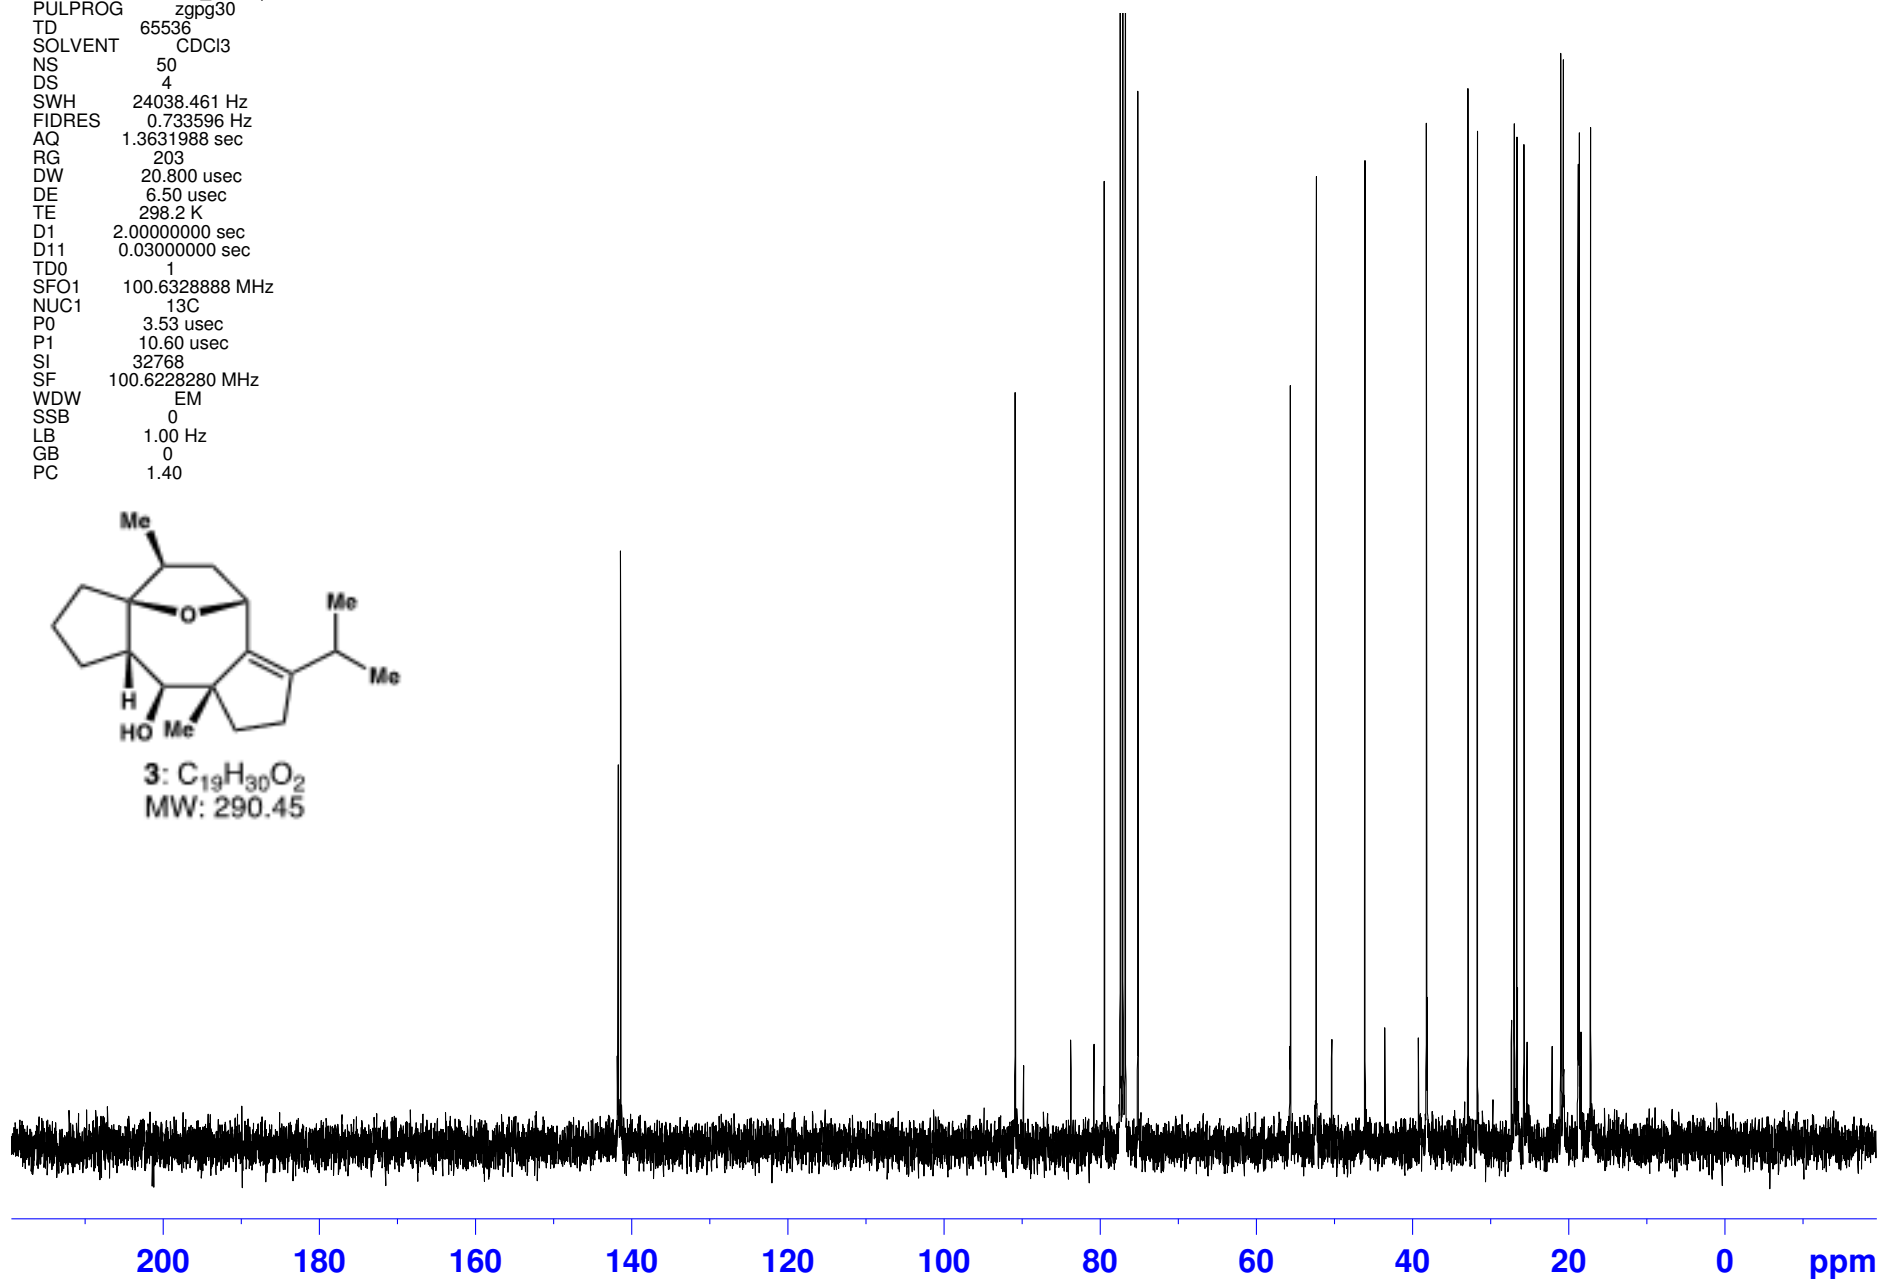

NAME JAL7229C 1H  
 EXPNO 1  
 PROCNO 1  
 Date\_ 20191112  
 Time 22.44 h  
 INSTRUM spect  
 PROBHD Z847801\_0093 (  
 PULPROG zg30  
 TD 65536  
 SOLVENT CDCl3  
 NS 16  
 DS 2  
 SWH 12019.230 Hz  
 FIDRES 0.366798 Hz  
 AQ 2.7263477 sec  
 RG 203  
 DW 41.600 usec  
 DE 10.42 usec  
 TE 293.6 K  
 D1 1.00000000 sec  
 TD0 1  
 SFO1 600.1337058 MHz  
 NUC1 1H  
 P0 5.00 usec  
 P1 15.00 usec  
 SI 65536  
 SF 600.1300000 MHz  
 WDW EM  
 SSB 0  
 LB 0.30 Hz  
 GB 0  
 PC 1.00

— 4.608  
 — 3.332  
 2.503  
 2.188  
 1.988  
 1.748  
 1.599  
 1.329  
 1.147  
 1.103  
 1.006  
 0.972

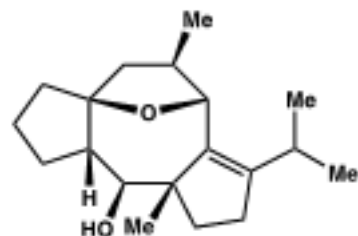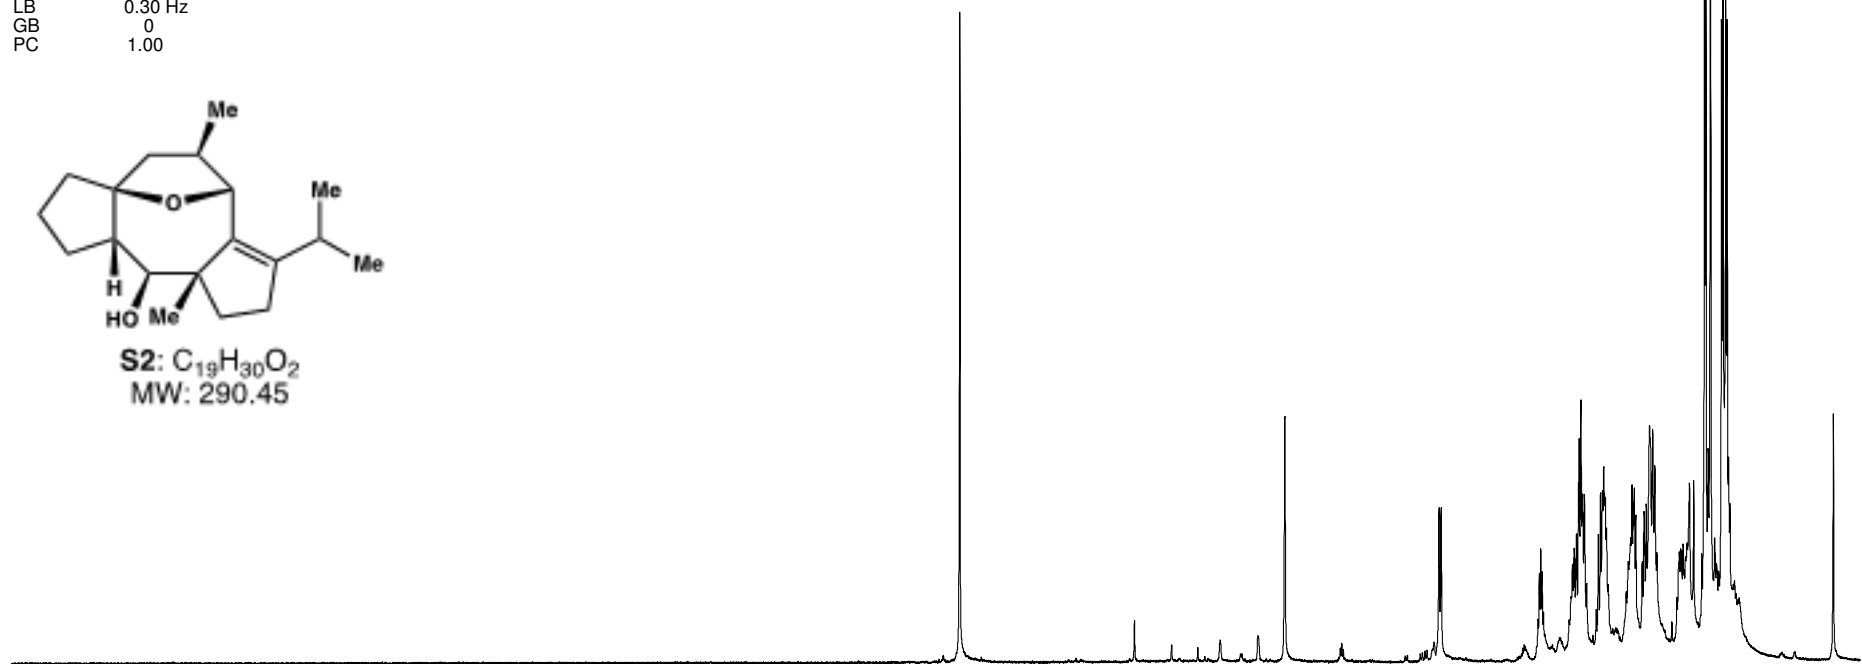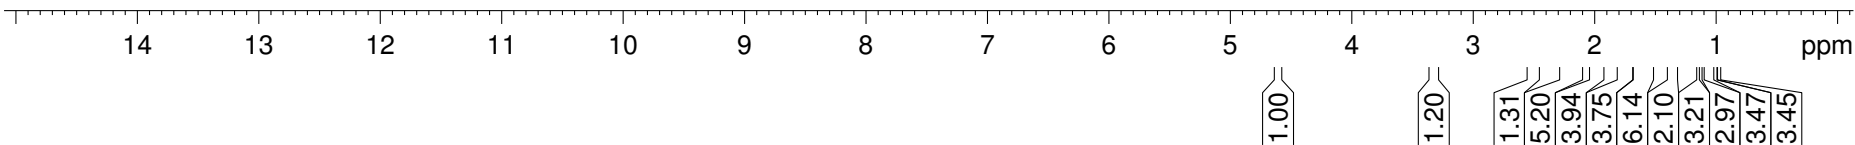

NAME JAL7137D 13C B700  
 EXPNO 1  
 PROCNO 1  
 Date\_ 20191007  
 Time 17.47 h  
 INSTRUM spect  
 PROBHD Z75813\_0011 (C  
 PULPROG zgpg30  
 TD 65536  
 SOLVENT CDCl3  
 NS 3681  
 DS 4  
 SWH 42613.637 Hz  
 FIDRES 1.300465 Hz  
 AQ 0.7690057 sec  
 RG 203  
 DW 11.733 usec  
 DE 18.00 usec  
 TE 298.0 K  
 D1 2.00000000 sec  
 D11 0.03000000 sec  
 TD0 1  
 SFO1 176.0880661 MHz  
 NUC1 13C  
 P0 4.00 usec  
 P1 12.00 usec  
 SI 32768  
 SF 176.0704590 MHz  
 WDW EM  
 SSB 0  
 LB 1.00 Hz  
 GB 0  
 PC 1.00

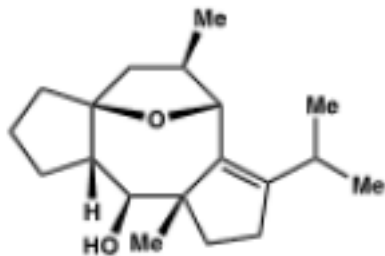

**S2: C<sub>19</sub>H<sub>30</sub>O<sub>2</sub>**  
**MW: 290.45**

144.13  
 137.03  
 107.81  
 95.84  
 82.52  
 77.23  
 77.05  
 76.86  
 55.60  
 54.53  
 53.65  
 53.40  
 39.26  
 38.66  
 35.46  
 30.89  
 29.73  
 27.30  
 26.78  
 22.03  
 21.70  
 21.37  
 17.24  
 16.34

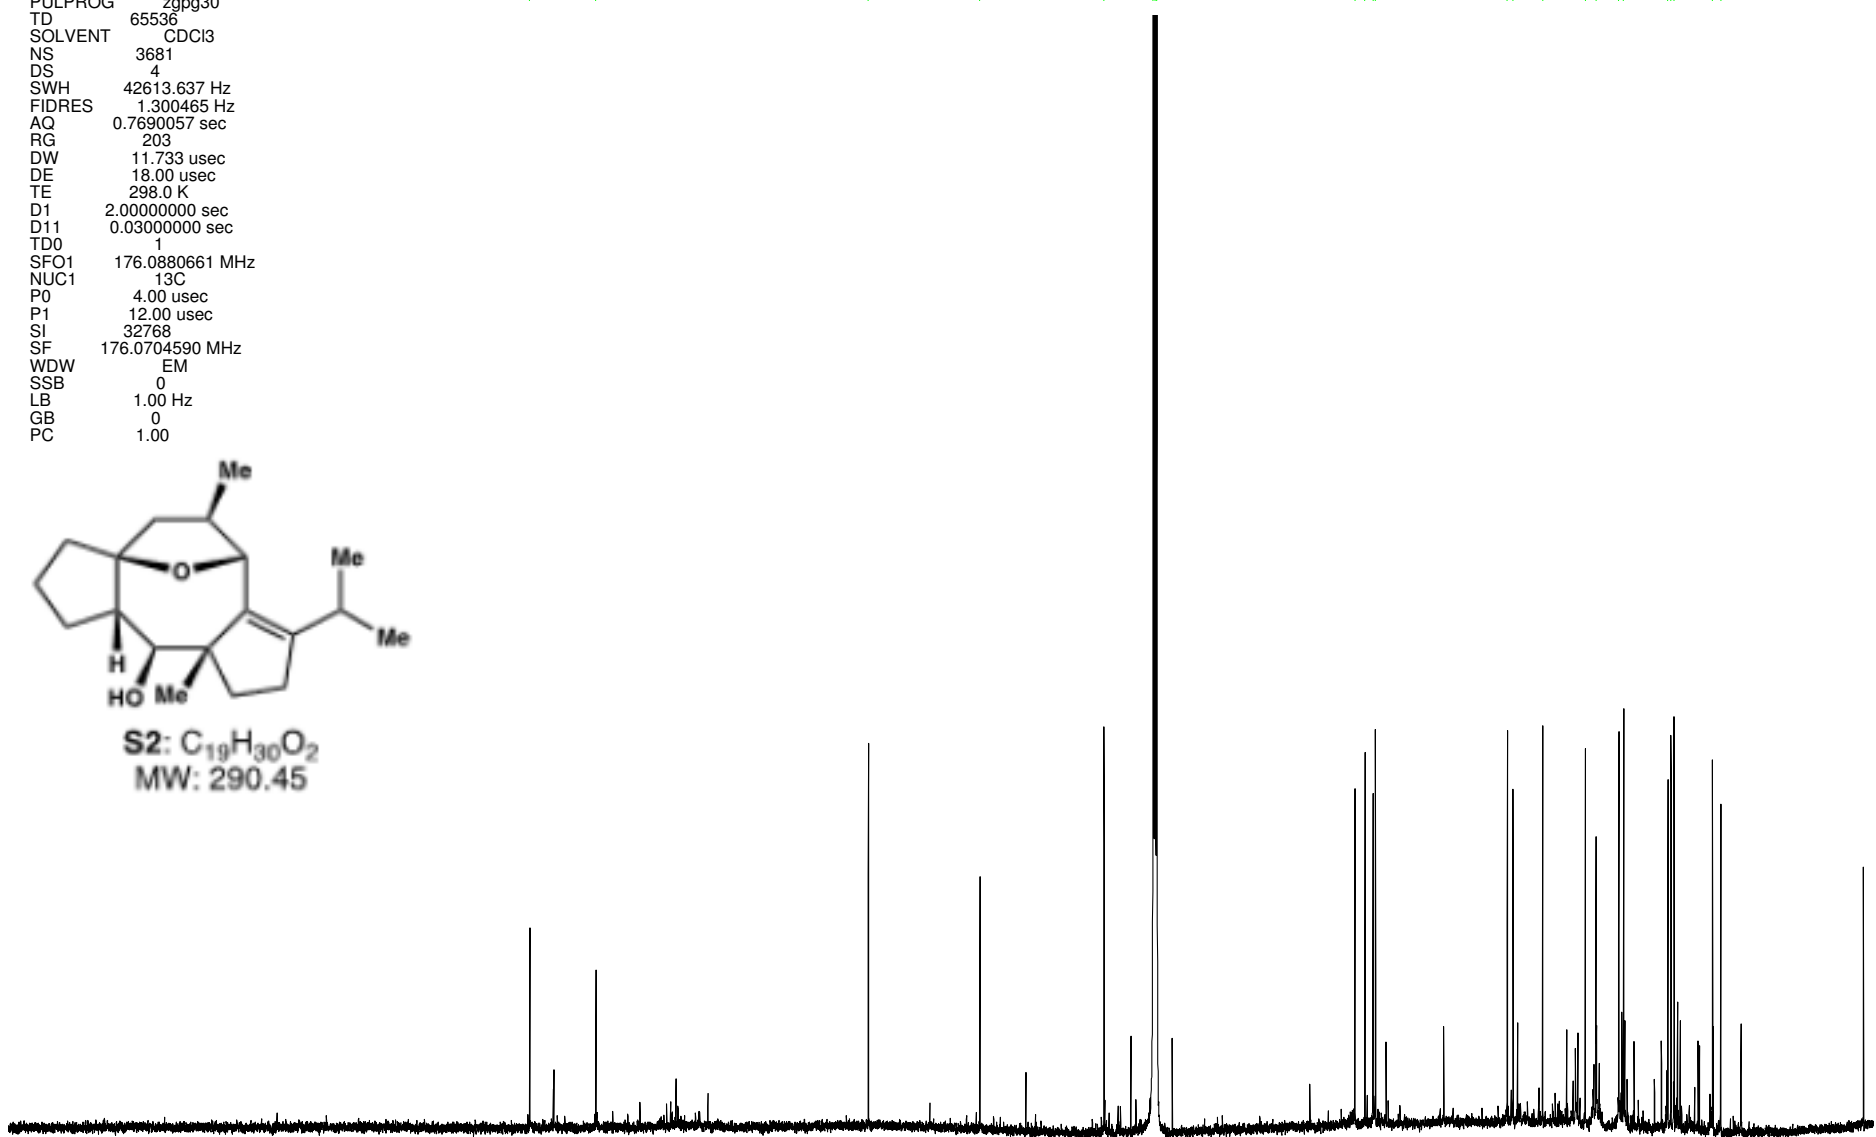

190 180 170 160 150 140 130 120 110 100 90 80 70 60 50 40 30 20 ppm

NAME AES 7275A 1H  
 EXPNO 1  
 PROCNO 1  
 Date\_ 20190118  
 Time 20.22  
 INSTRUM spect  
 PROBHD 5 mm PABBO BB-  
 PULPROG zg30  
 TD 65536  
 SOLVENT CDCl3  
 NS 16  
 DS 2  
 SWH 12335.526 Hz  
 FIDRES 0.188225 Hz  
 AQ 2.6564426 sec  
 RG 181  
 DW 40.533 usec  
 DE 6.50 usec  
 TE 298.2 K  
 D1 1.00000000 sec  
 TD0 1

===== CHANNEL f1 =====  
 NUC1 1H  
 P1 13.00 usec  
 PL1 -1.40 dB  
 PL1W 16.22728539 W  
 SFO1 600.1337060 MHz  
 SI 32768  
 SF 600.1300167 MHz  
 WDW EM  
 SSB 0  
 LB 0.30 Hz  
 GB 0  
 PC 1.00

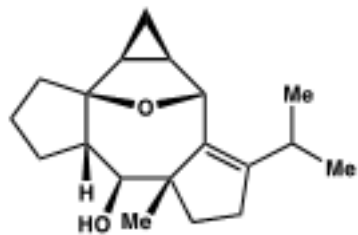

**S3: C<sub>19</sub>H<sub>28</sub>O<sub>2</sub>**  
**MW: 288.43**

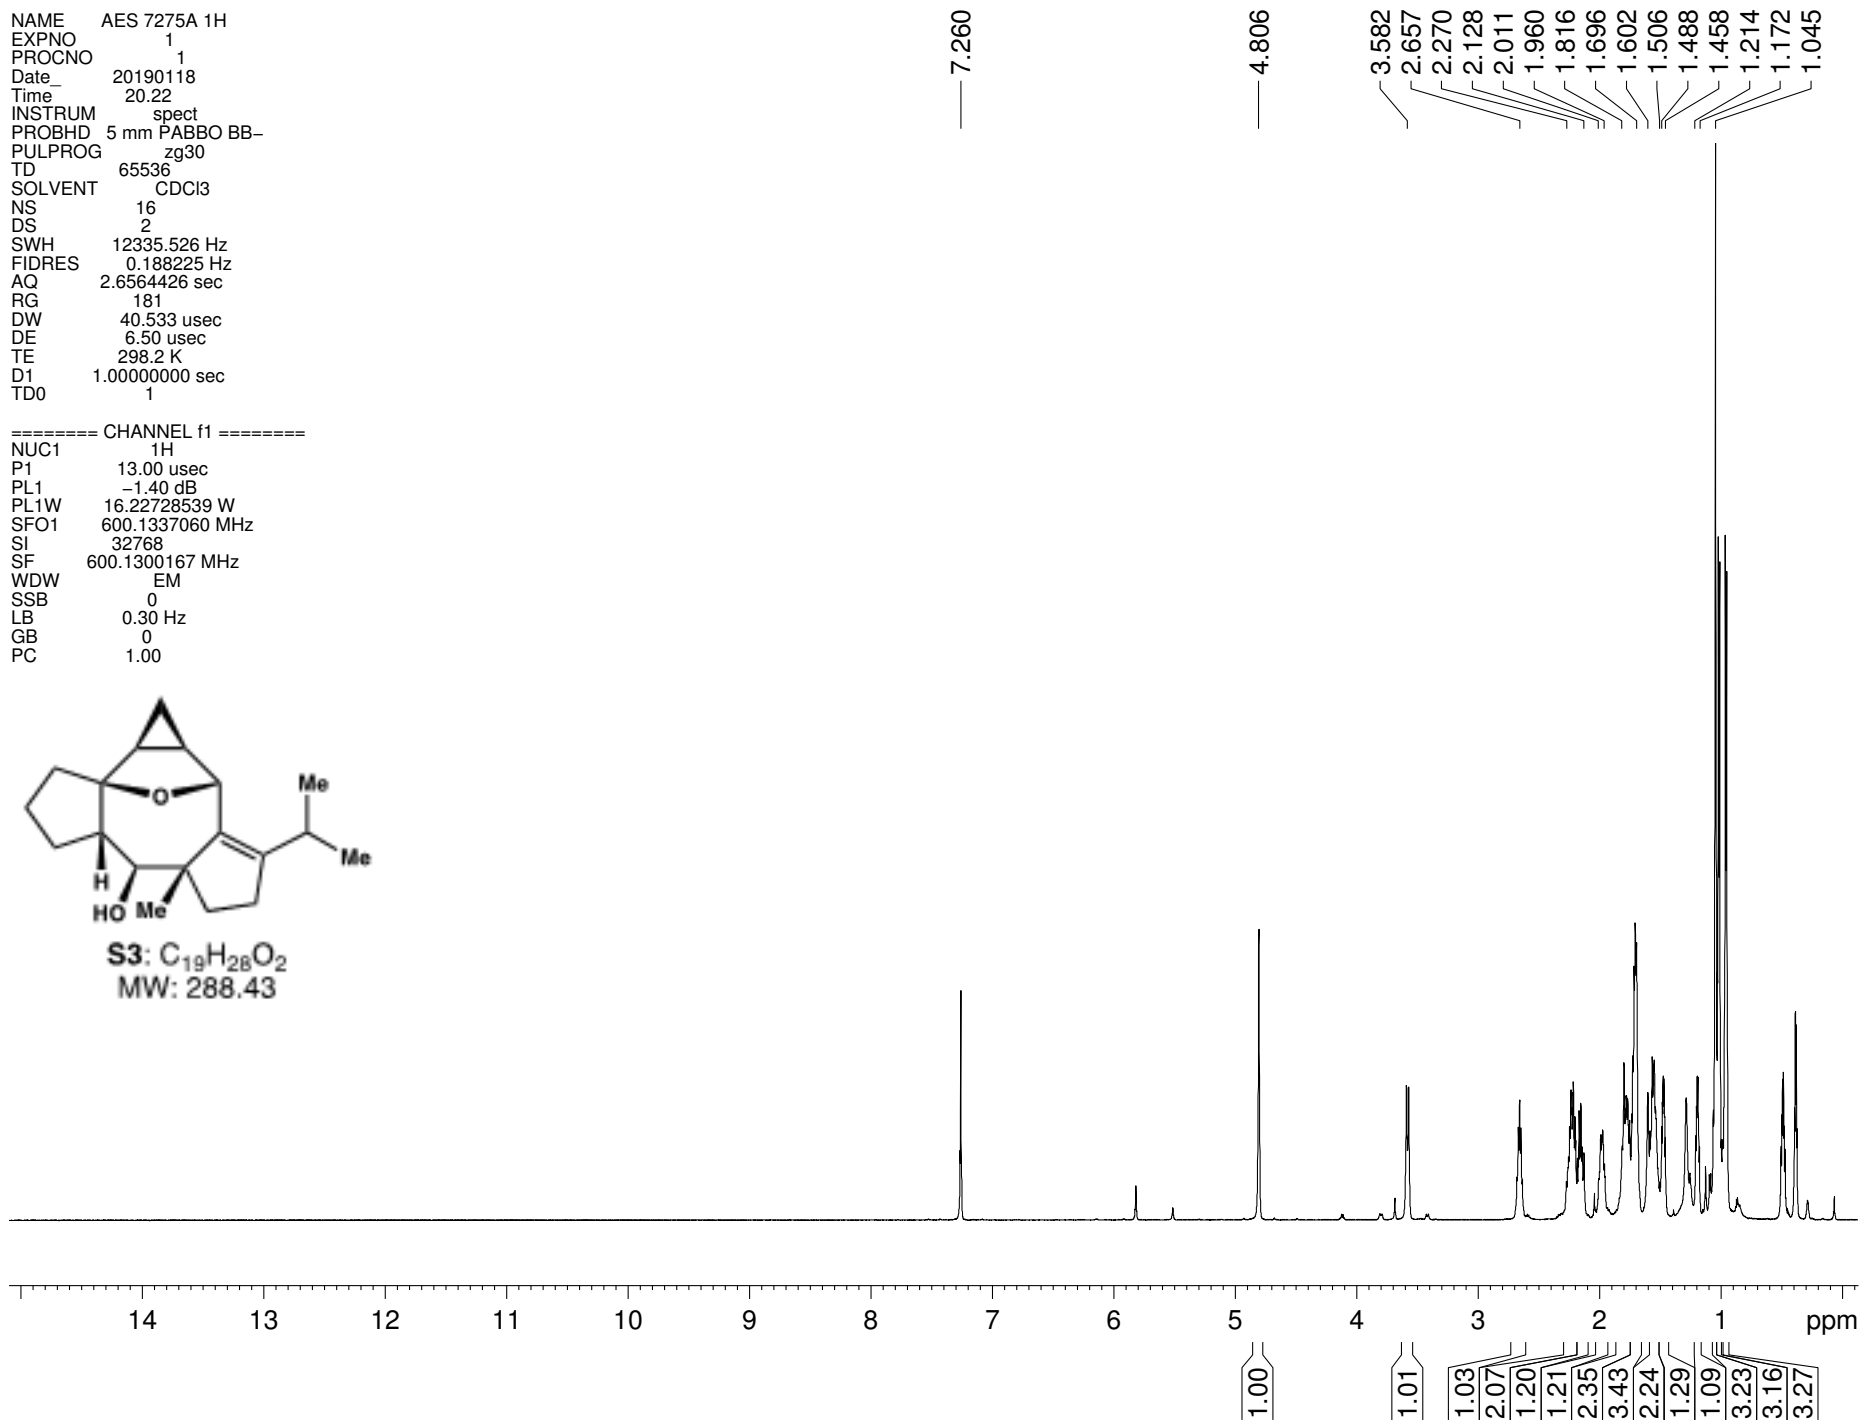

NAME AES 7275A C13  
 EXPNO 1  
 PROCNO 1  
 Date\_ 20190118  
 Time 20.30  
 INSTRUM spect  
 PROBHD 5 mm PABBO BB-  
 PULPROG zgpg30  
 TD 65536  
 SOLVENT CDCl3  
 NS 358  
 DS 4  
 SWH 39062.500 Hz  
 FIDRES 0.596046 Hz  
 AQ 0.8389108 sec  
 RG 203  
 DW 12.800 usec  
 DE 6.50 usec  
 TE 298.3 K  
 D1 2.00000000 sec  
 D11 0.03000000 sec  
 TD0 1

===== CHANNEL f1 =====  
 NUC1 13C  
 P1 9.50 usec  
 PL1 3.00 dB  
 PL1W 59.92485046 W  
 SFO1 150.9178988 MHz

===== CHANNEL f2 =====  
 CPDPRG2 waltz16  
 NUC2 1H  
 PCPD2 80.00 usec  
 PL2 -1.40 dB  
 PL12 14.38 dB  
 PL13 13.70 dB  
 PL2W 16.22728539 W  
 PL12W 0.42879117 W  
 PL13W 0.50147104 W  
 SFO2 600.1324005 MHz  
 SI 32768  
 SF 150.9028090 MHz  
 WDW EM  
 SSB 0  
 LB 1.00 Hz  
 GB 0  
 PC 1.40

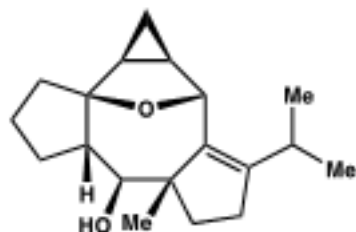

**S3: C<sub>19</sub>H<sub>28</sub>O<sub>2</sub>**  
**MW: 288.43**

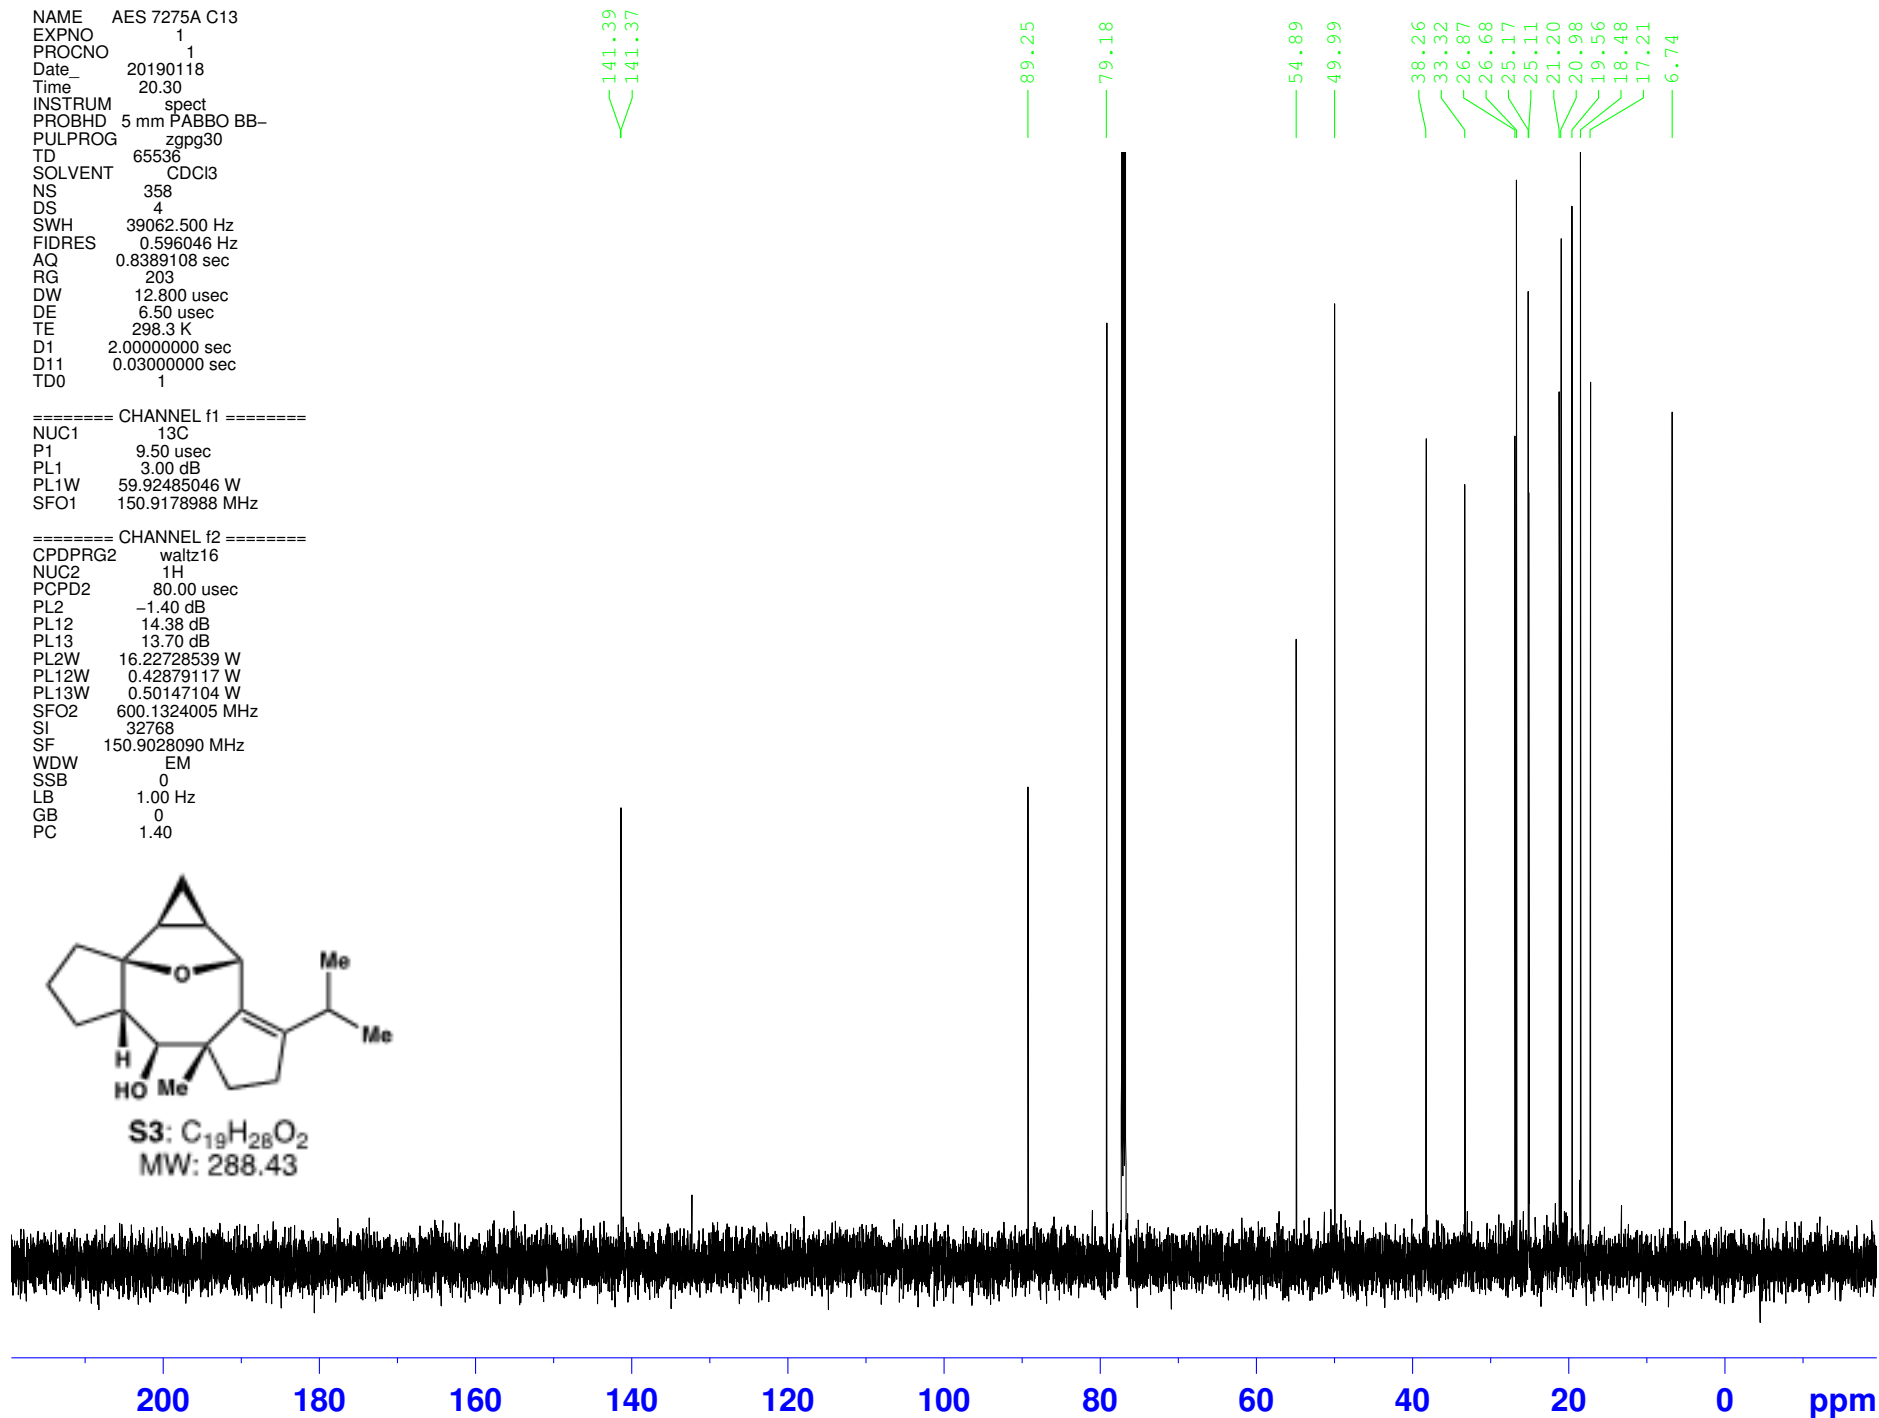

NAME JAL7027A 1H  
 EXPNO 1  
 PROCNO 1  
 Date\_ 20190804  
 Time 21.03  
 INSTRUM spect  
 PROBHD 5 mm PABBO BB-  
 PULPROG zg30  
 TD 65536  
 SOLVENT CDCl3  
 NS 5  
 DS 2  
 SWH 8223.685 Hz  
 FIDRES 0.125483 Hz  
 AQ 3.9846387 sec  
 RG 203  
 DW 60.800 usec  
 DE 6.50 usec  
 TE 297.8 K  
 D1 1.00000000 sec  
 TD0 1

===== CHANNEL f1 =====  
 NUC1 1H  
 P1 10.00 usec  
 PL1 -2.78 dB  
 PL1W 27.10892296 W  
 SFO1 400.1724712 MHz  
 SI 32768  
 SF 400.1700082 MHz  
 WDW EM  
 SSB 0  
 LB 0.30 Hz  
 GB 0  
 PC 1.00

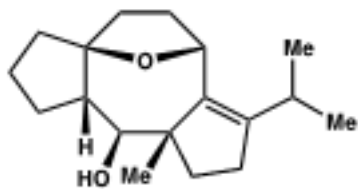

**S4: C<sub>18</sub>H<sub>28</sub>O<sub>2</sub>**  
**MW: 276.42**

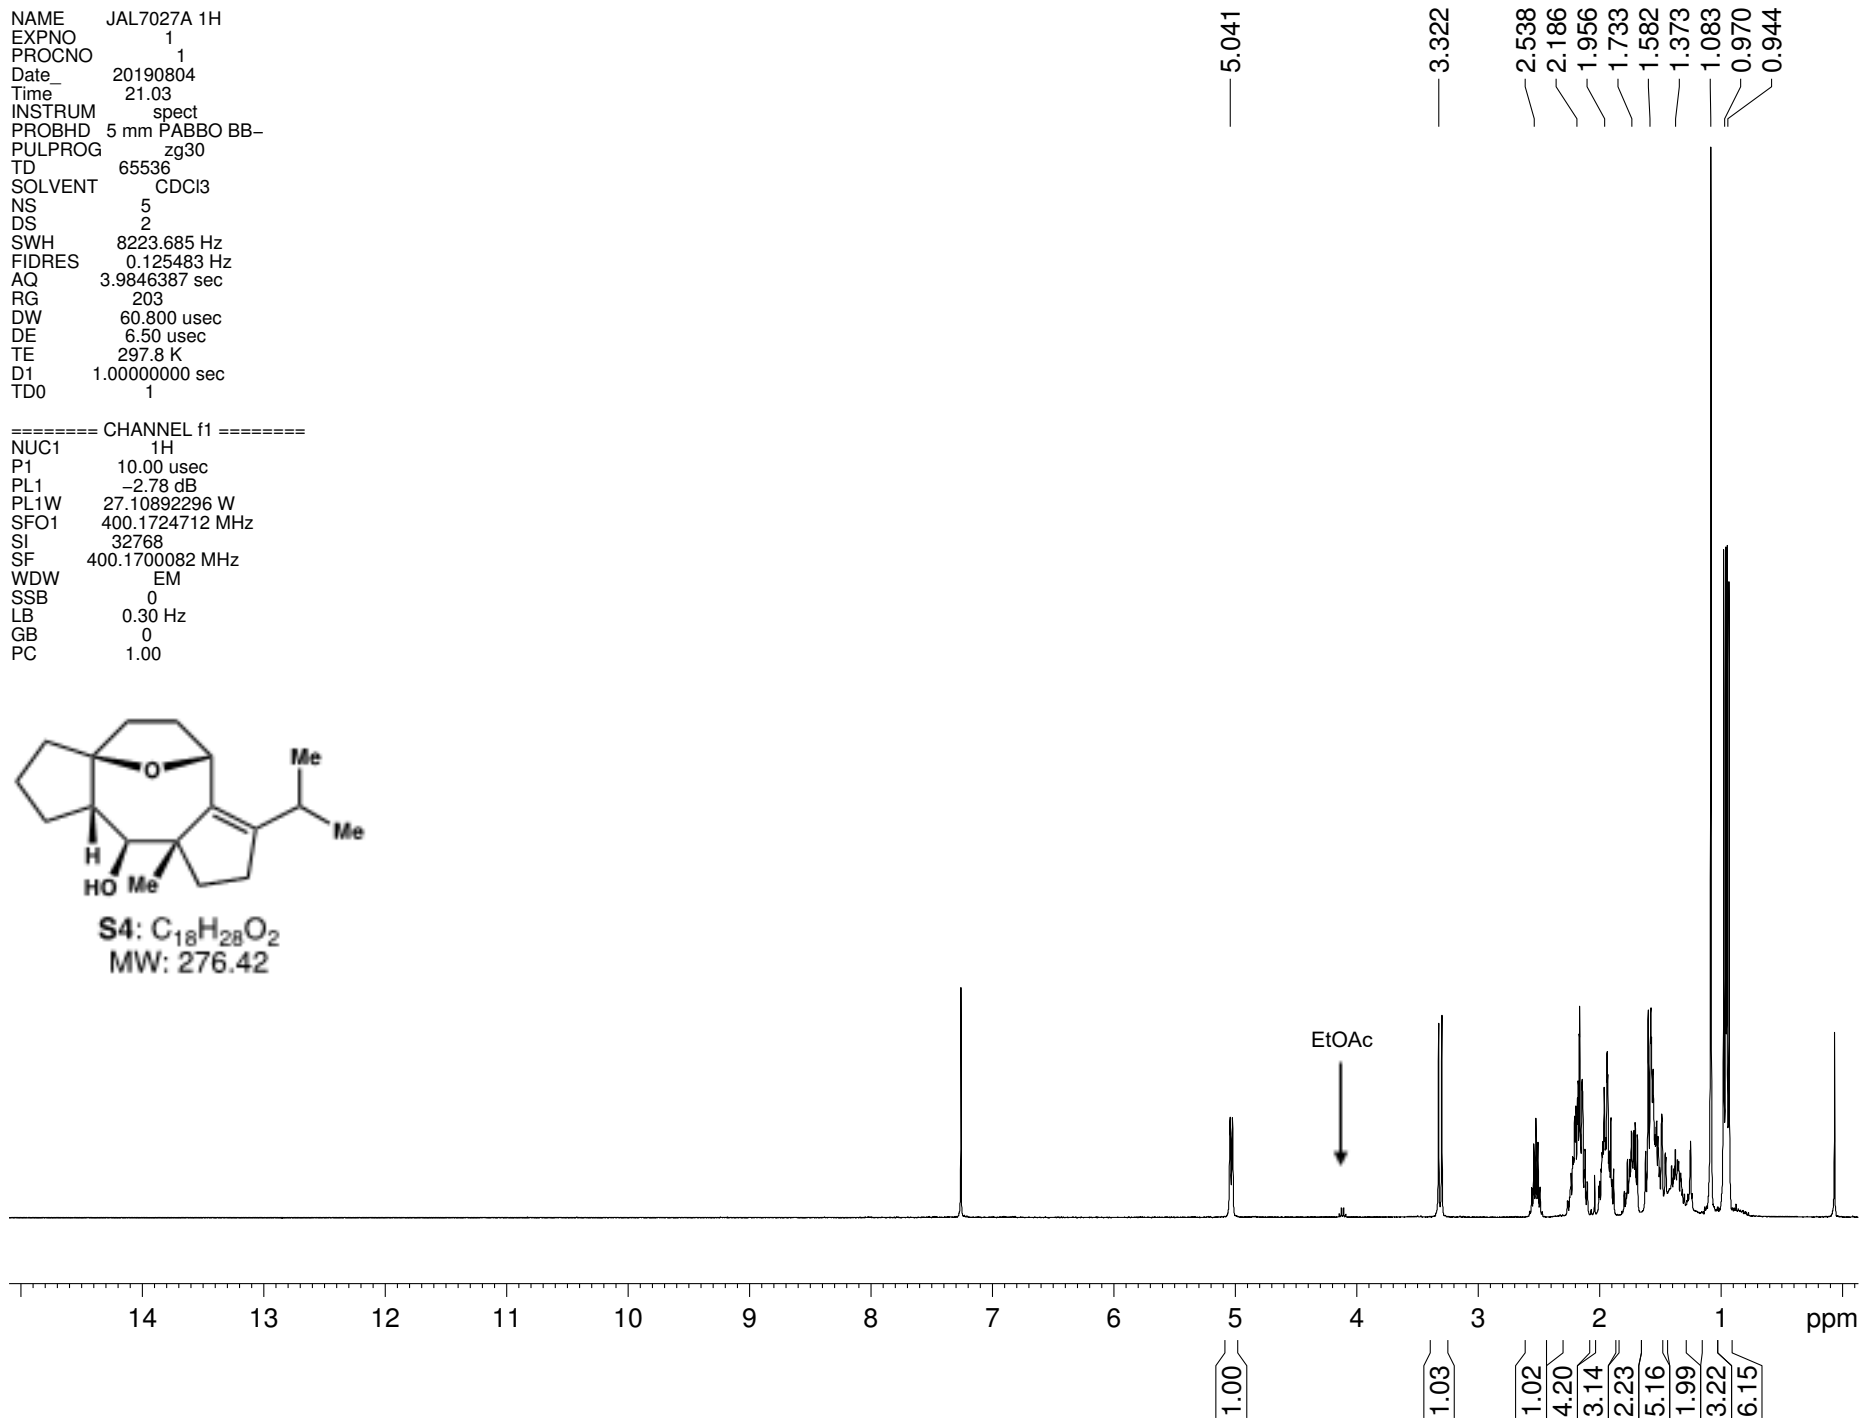

NAME AES 6232 C13  
 EXPNO 1  
 PROCNO 1  
 Date\_ 20180626  
 Time 23.54  
 INSTRUM spect  
 PROBHD 5 mm PABBO BB-  
 PULPROG zgpg30  
 TD 65536  
 SOLVENT CDCI3  
 NS 1421  
 DS 4  
 SWH 42613.637 Hz  
 FIDRES 0.650232 Hz  
 AQ 0.7690057 sec  
 RG 203  
 DW 11.733 usec  
 DE 6.50 usec  
 TE 298.6 K  
 D1 2.00000000 sec  
 D11 0.03000000 sec  
 TD0 1

===== CHANNEL f1 =====  
 NUC1 13C  
 P1 9.50 usec  
 PL1 3.00 dB  
 PL1W 59.92485046 W  
 SFO1 150.9178988 MHz

===== CHANNEL f2 =====  
 CPDPRG2 waltz16  
 NUC2 1H  
 PCPD2 80.00 usec  
 PL2 -1.40 dB  
 PL12 14.38 dB  
 PL13 13.70 dB  
 PL2W 16.22728539 W  
 PL12W 0.42879117 W  
 PL13W 0.50147104 W  
 SFO2 600.1324005 MHz  
 SI 32768  
 SF 150.9028090 MHz  
 WDW EM  
 SSB 0  
 LB 1.00 Hz  
 GB 0  
 PC 1.40

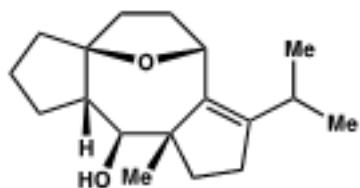

**S4: C<sub>18</sub>H<sub>28</sub>O<sub>2</sub>**  
**MW: 276.42**

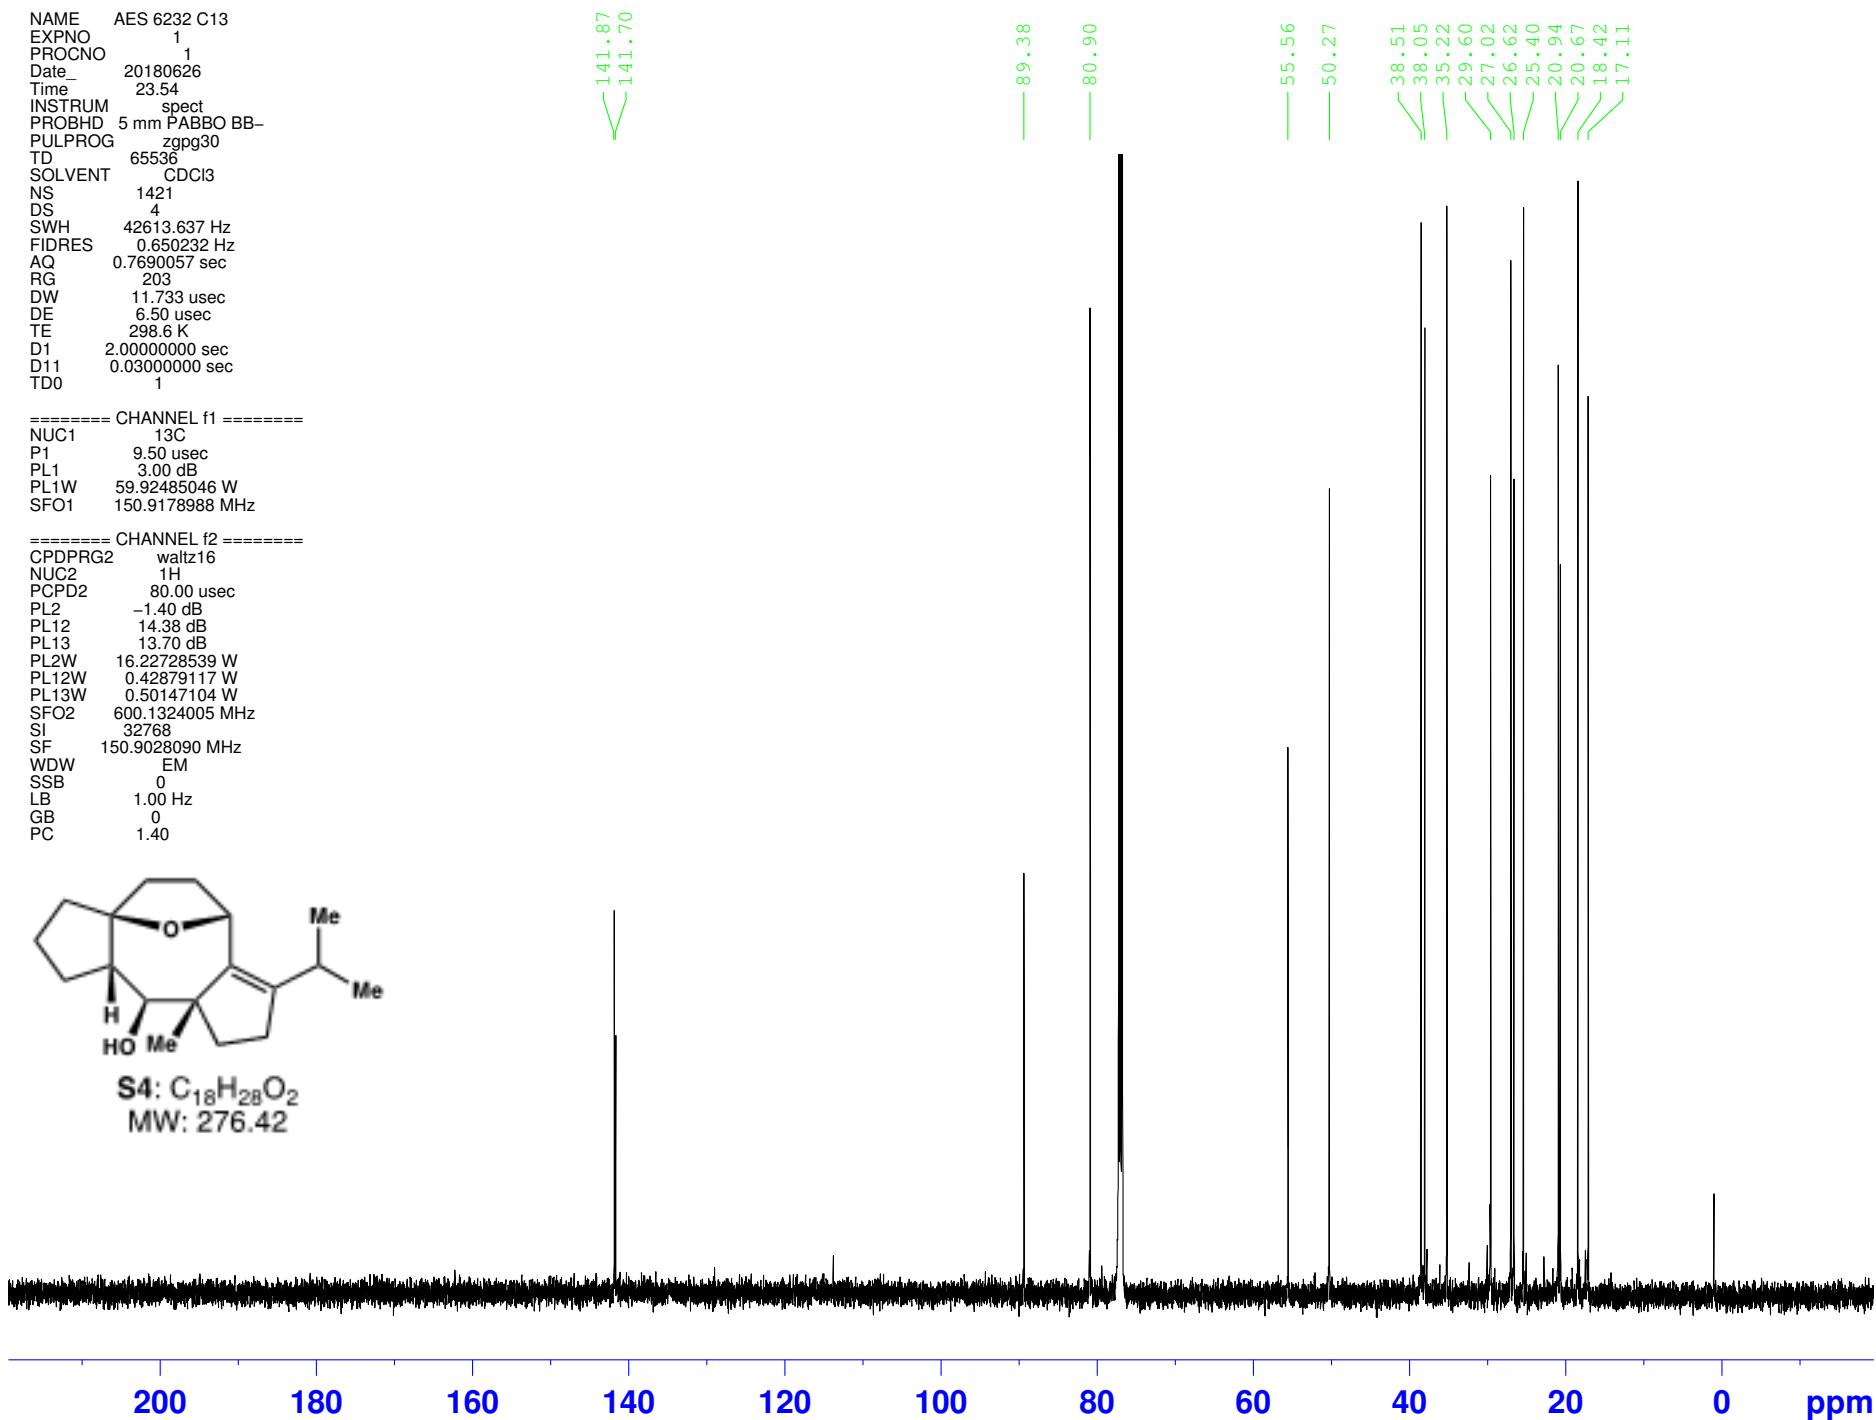



NAME NMB1147 A  
 EXPNO 1  
 PROCNO 1  
 Date\_ 20200123  
 Time 10.54 h  
 INSTRUM spect  
 PROBHD Z108618\_0106 (  
 PULPROG zg30  
 TD 65536  
 SOLVENT CDCl3  
 NS 16  
 DS 2  
 SWH 8012.820 Hz  
 FIDRES 0.244532 Hz  
 AQ 4.0894966 sec  
 RG 203  
 DW 62.400 usec  
 DE 16.92 usec  
 TE 293.8 K  
 D1 1.00000000 sec  
 TD0 1  
 SFO1 400.1724710 MHz  
 NUC1 1H  
 P0 5.00 usec  
 P1 15.00 usec  
 SI 65536  
 SF 400.1700000 MHz  
 WDW no  
 SSB 0  
 LB 0.00 Hz  
 GB 0  
 PC 1.00

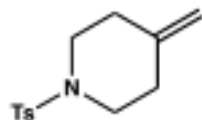

4: C<sub>13</sub>H<sub>17</sub>NO<sub>2</sub>S  
 MW: 251.34

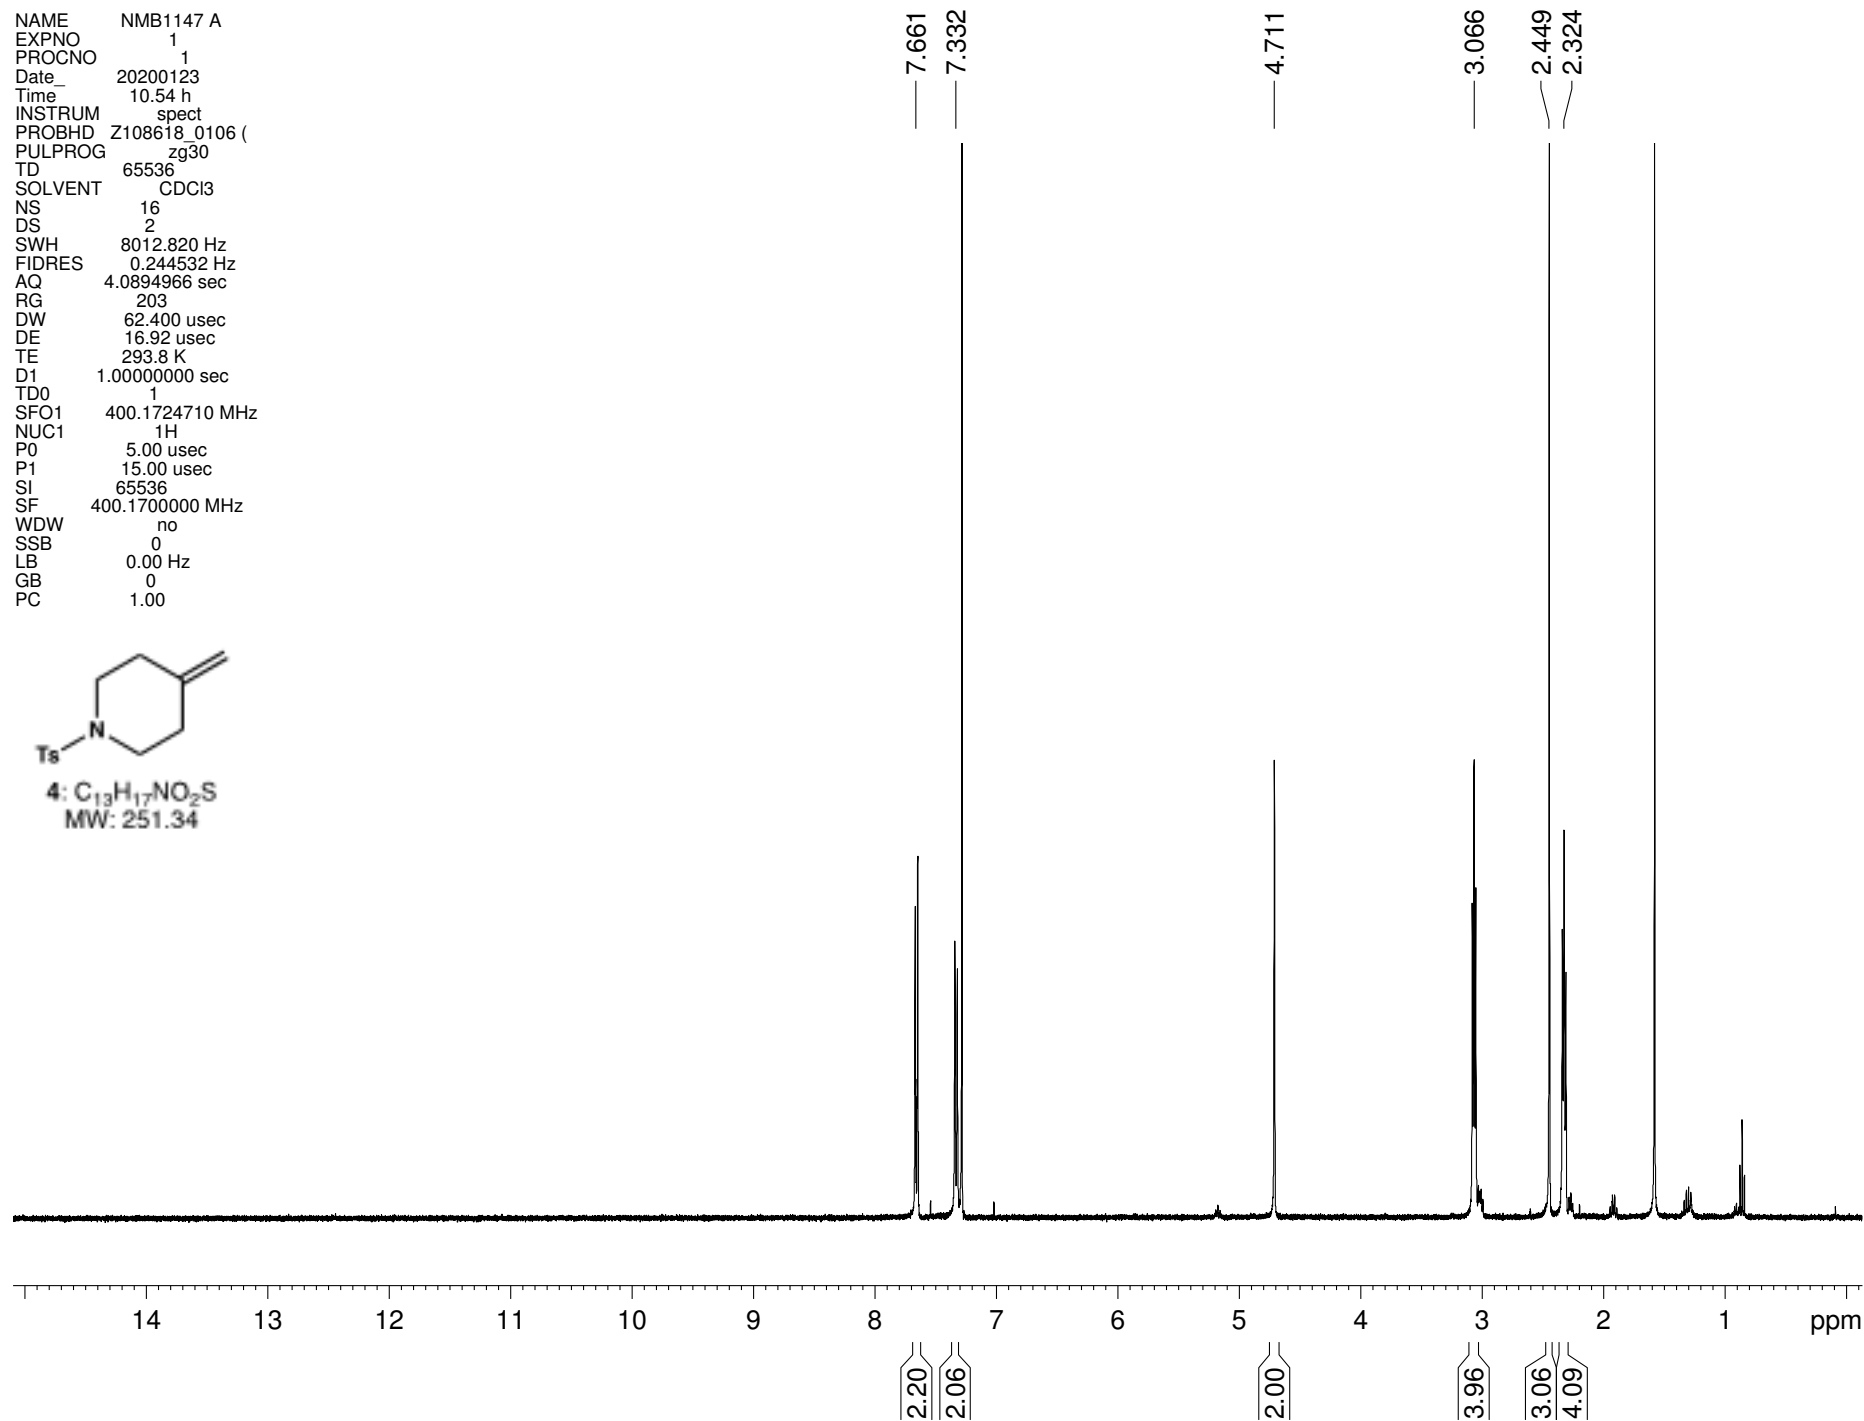

NAME NMB SKNBocPiperidine Olefin  
EXPNO 1  
PROCNO 1  
Date\_ 20200629  
Time 21.18 h  
INSTRUM spect  
PROBHD Z108618\_0106 (  
PULPROG zg30  
TD 65536  
SOLVENT CDCl3  
NS 16  
DS 2  
SWH 8012.820 Hz  
FIDRES 0.244532 Hz  
AQ 4.0894966 sec  
RG 161  
DW 62.400 usec  
DE 16.92 usec  
TE 297.6 K  
D1 1.00000000 sec  
TD0 1  
SFO1 400.1724710 MHz  
NUC1 1H  
P0 5.00 usec  
P1 15.00 usec  
SI 65536  
SF 400.1700000 MHz  
WDW no  
SSB 0  
LB 0.00 Hz  
GB 0  
PC 1.00

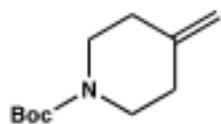

11a: C<sub>11</sub>H<sub>19</sub>NO<sub>2</sub>  
MW: 197.28

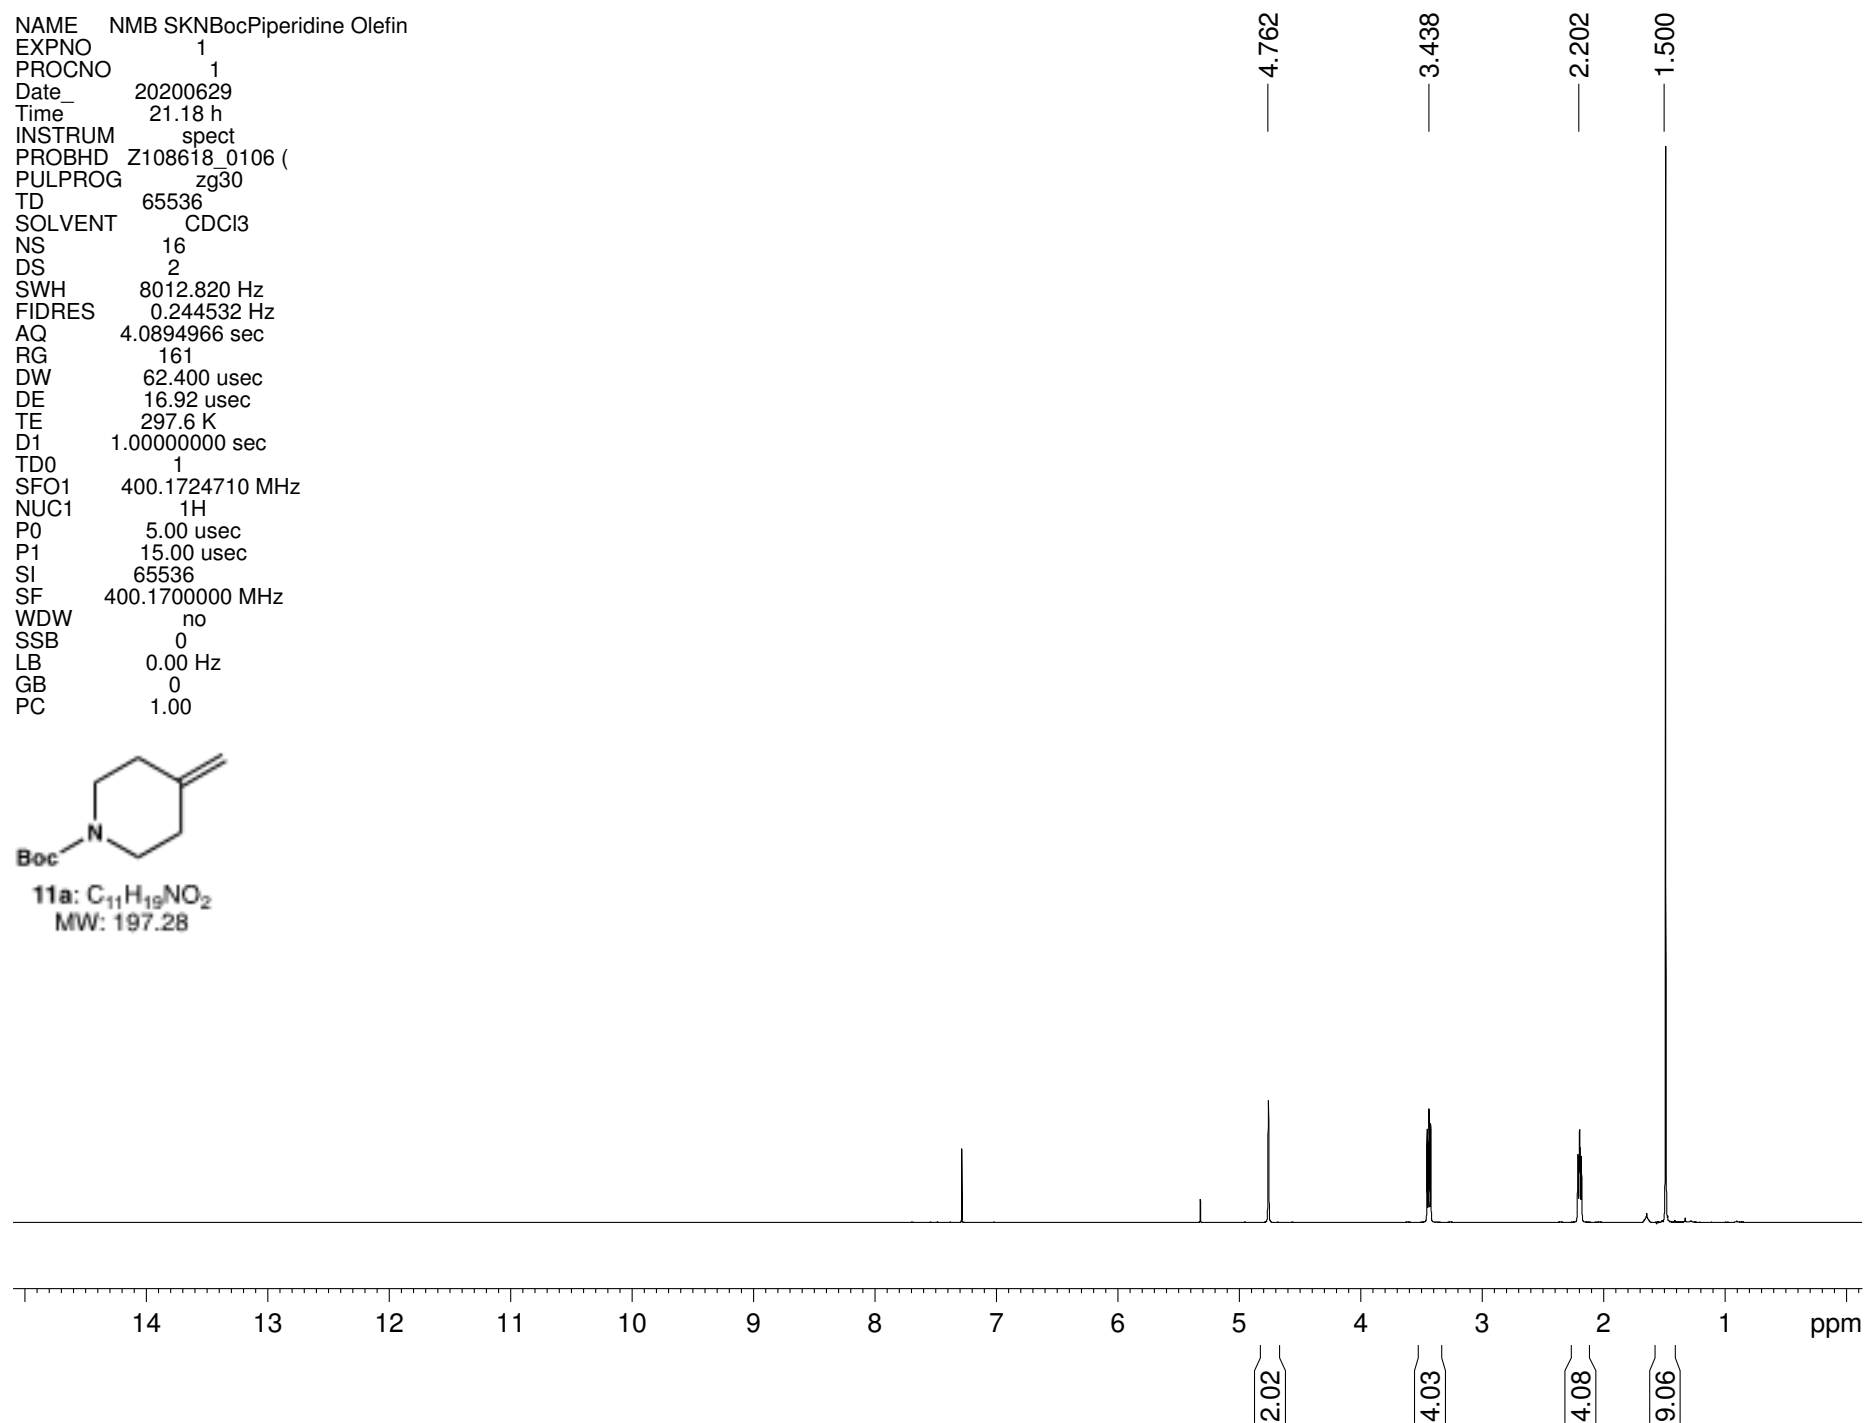

NAME NMB2116 1H  
 EXPNO 1  
 PROCNO 1  
 Date\_ 20201224  
 Time 10.21 h  
 INSTRUM spect  
 PROBHD Z108618\_0106 (  
 PULPROG zg30  
 TD 65536  
 SOLVENT CDCl3  
 NS 16  
 DS 2  
 SWH 8012.820 Hz  
 FIDRES 0.244532 Hz  
 AQ 4.0894966 sec  
 RG 203  
 DW 62.400 usec  
 DE 16.92 usec  
 TE 297.6 K  
 D1 1.00000000 sec  
 TD0 1  
 SFO1 400.1724710 MHz  
 NUC1 1H  
 P0 5.00 usec  
 P1 15.00 usec  
 SI 65536  
 SF 400.1700000 MHz  
 WDW no  
 SSB 0  
 LB 0.00 Hz  
 GB 0  
 PC 1.00

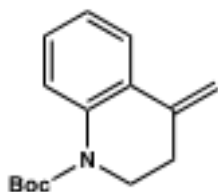

**11c:** C<sub>15</sub>H<sub>19</sub>NO<sub>2</sub>  
 MW: 245.32

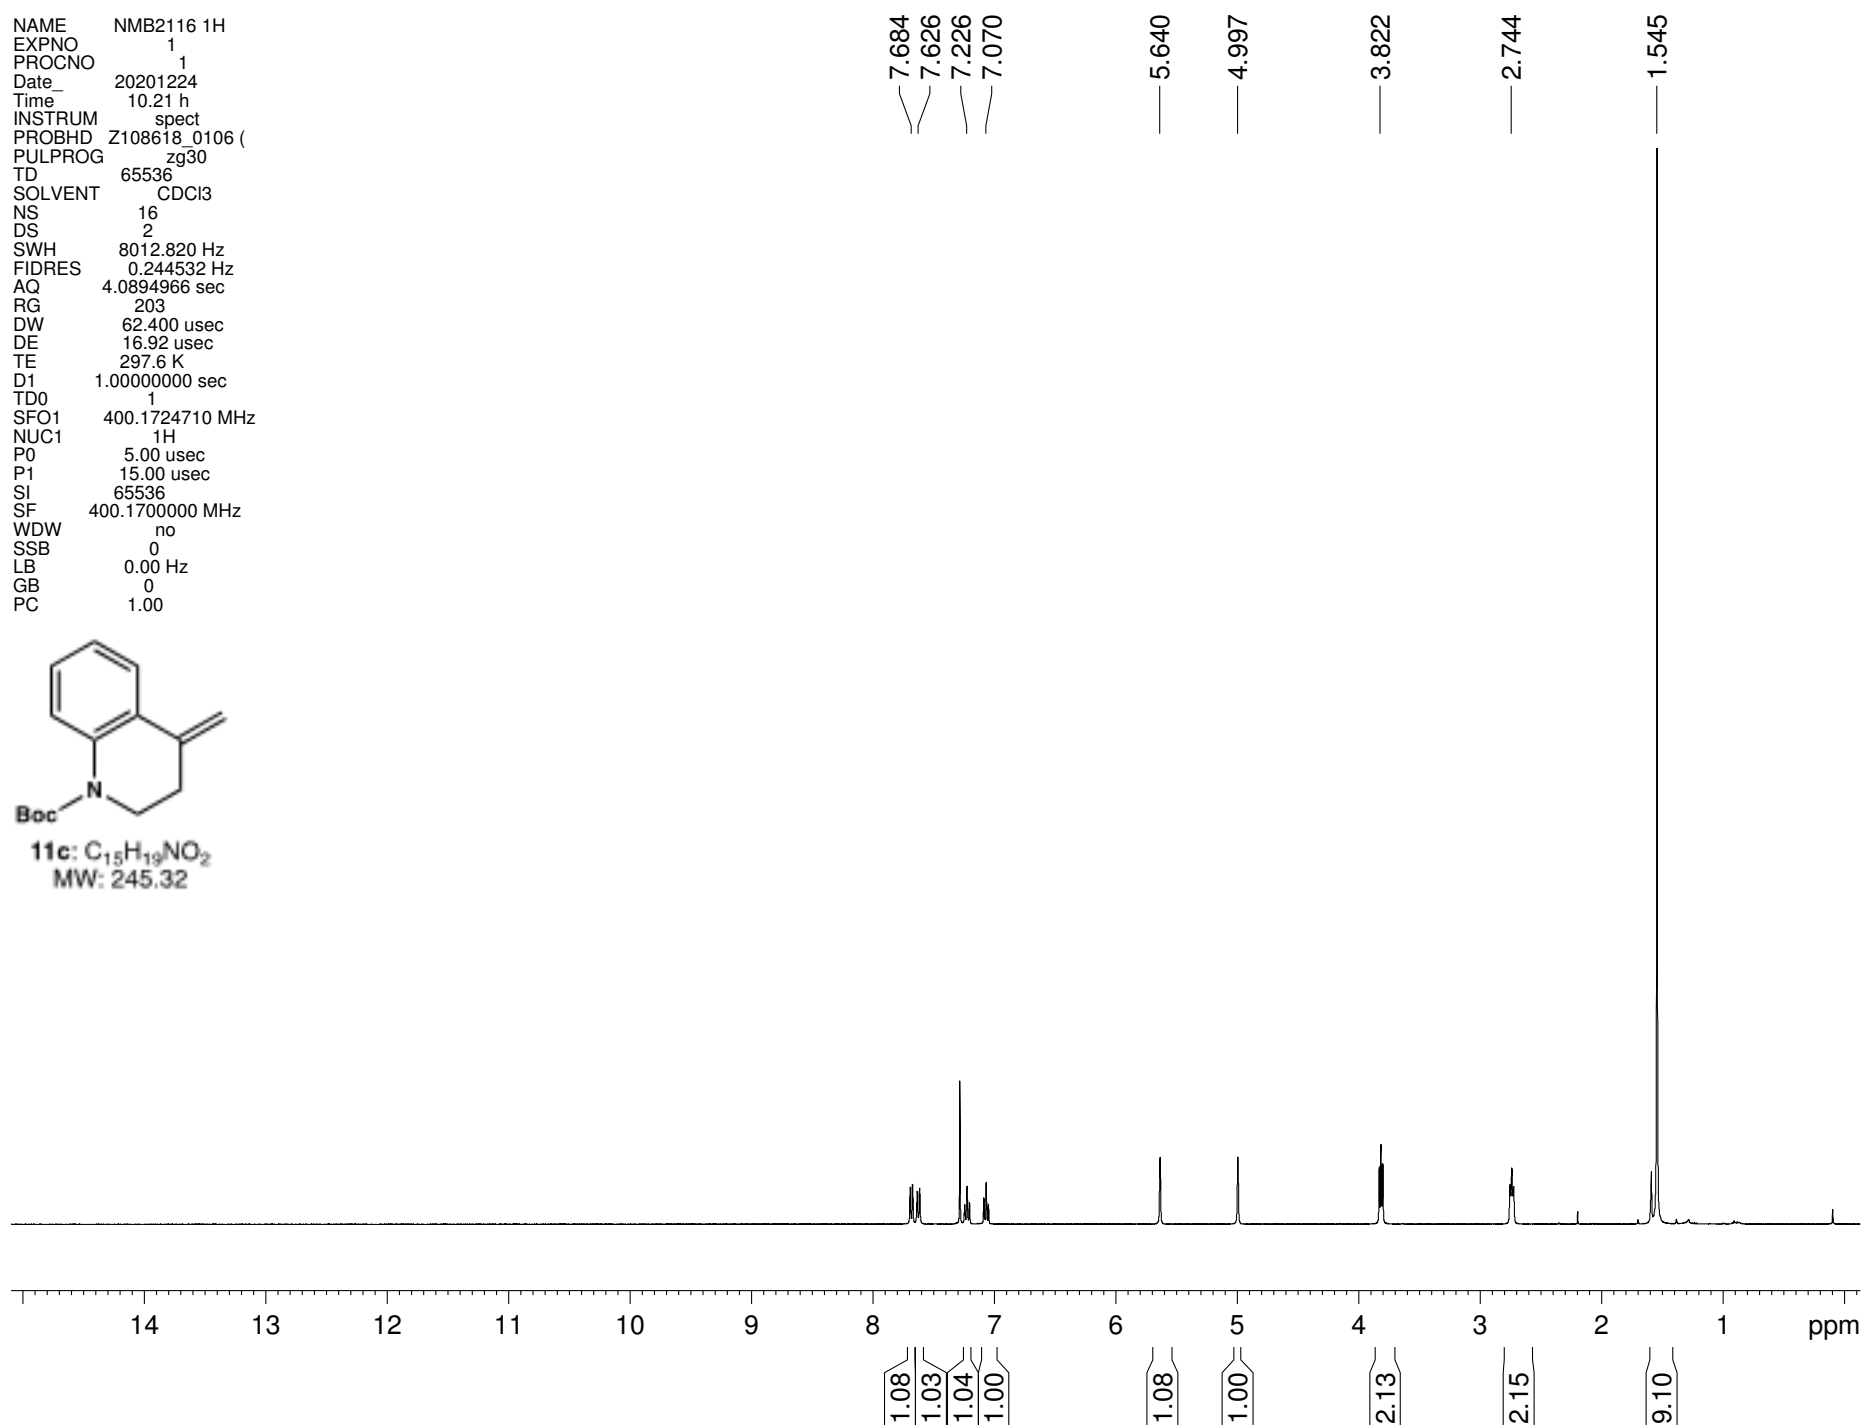

NAME NMB1290 13C  
 EXPNO 6  
 PROCNO 1  
 Date\_ 20200723  
 Time 22.06 h  
 INSTRUM spect  
 PROBHD Z847801\_0093 (  
 PULPROG zgpg30  
 TD 65536  
 SOLVENT CDCl3  
 NS 1024  
 DS 4  
 SWH 36231.883 Hz  
 FIDRES 1.105709 Hz  
 AQ 0.9044468 sec  
 RG 203  
 DW 13.800 usec  
 DE 6.50 usec  
 TE 299.6 K  
 D1 2.00000000 sec  
 D11 0.03000000 sec  
 TD0 1  
 SFO1 150.9178988 MHz  
 NUC1 13C  
 P0 3.33 usec  
 P1 10.00 usec  
 SI 32768  
 SF 150.9028090 MHz  
 WDW EM  
 SSB 0  
 LB 1.00 Hz  
 GB 0  
 PC 1.40

153.58  
 139.00  
 138.32  
 127.81  
 127.32  
 124.81  
 124.14  
 123.90  
 109.26  
 81.12  
 44.21  
 32.67  
 28.49

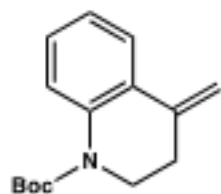

**11c**: C<sub>15</sub>H<sub>19</sub>NO<sub>2</sub>  
 MW: 245.32

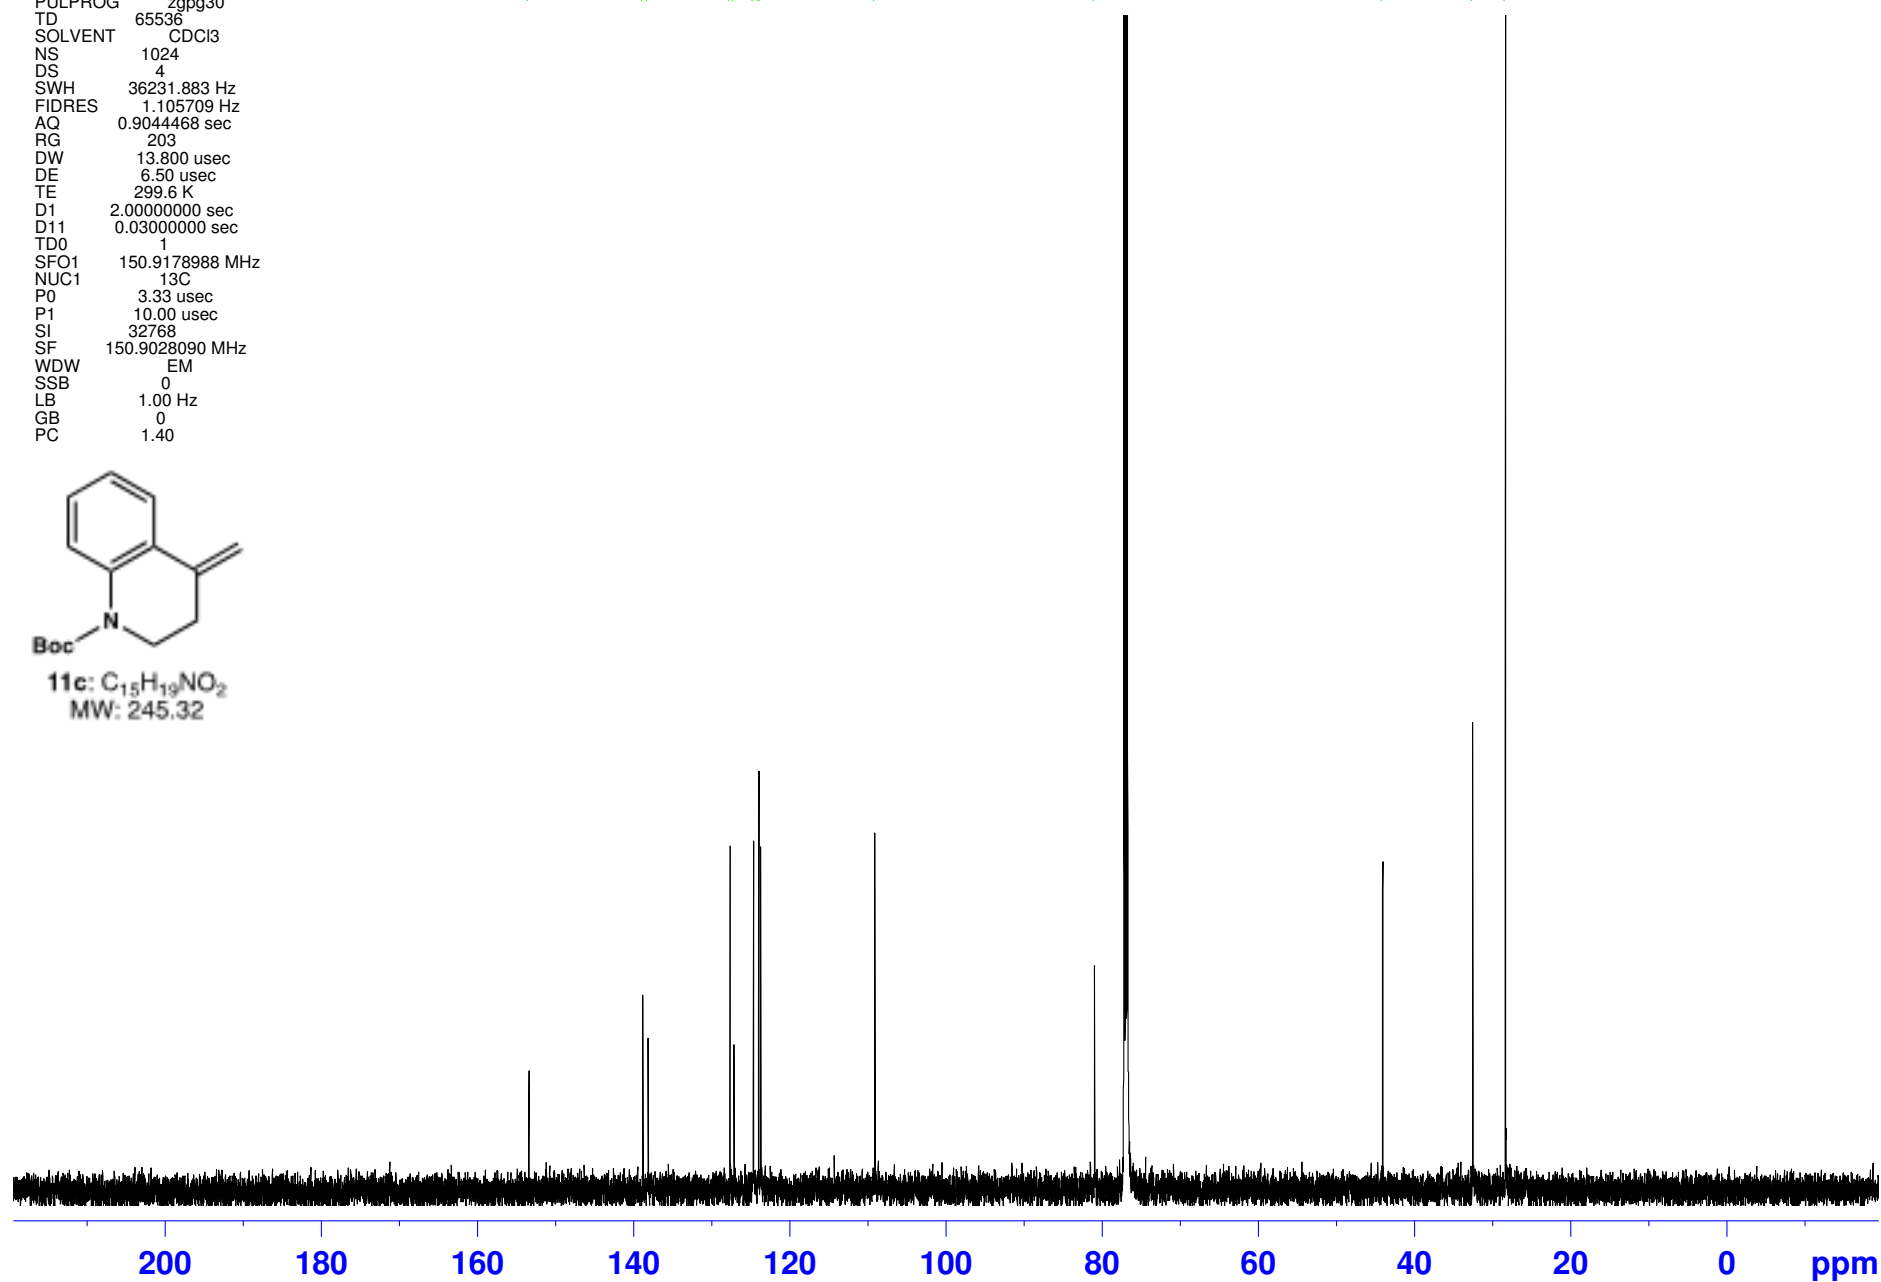

NAME NMB1283  
EXPNO 6  
PROCNO 1  
Date\_ 20200722  
Time 15.03 h  
INSTRUM spect  
PROBHD Z108618\_0106 (  
PULPROG zg30  
TD 65536  
SOLVENT CDCl3  
NS 16  
DS 2  
SWH 8012.820 Hz  
FIDRES 0.244532 Hz  
AQ 4.0894966 sec  
RG 203  
DW 62.400 usec  
DE 16.92 usec  
TE 297.5 K  
D1 1.00000000 sec  
TD0 1  
SFO1 400.1724710 MHz  
NUC1 1H  
P0 5.00 usec  
P1 15.00 usec  
SI 65536  
SF 400.1700000 MHz  
WDW no  
SSB 0  
LB 0.00 Hz  
GB 0  
PC 1.00

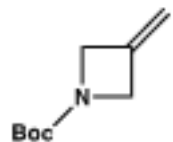

11d:  $C_9H_{15}NO_2$   
MW: 169.22

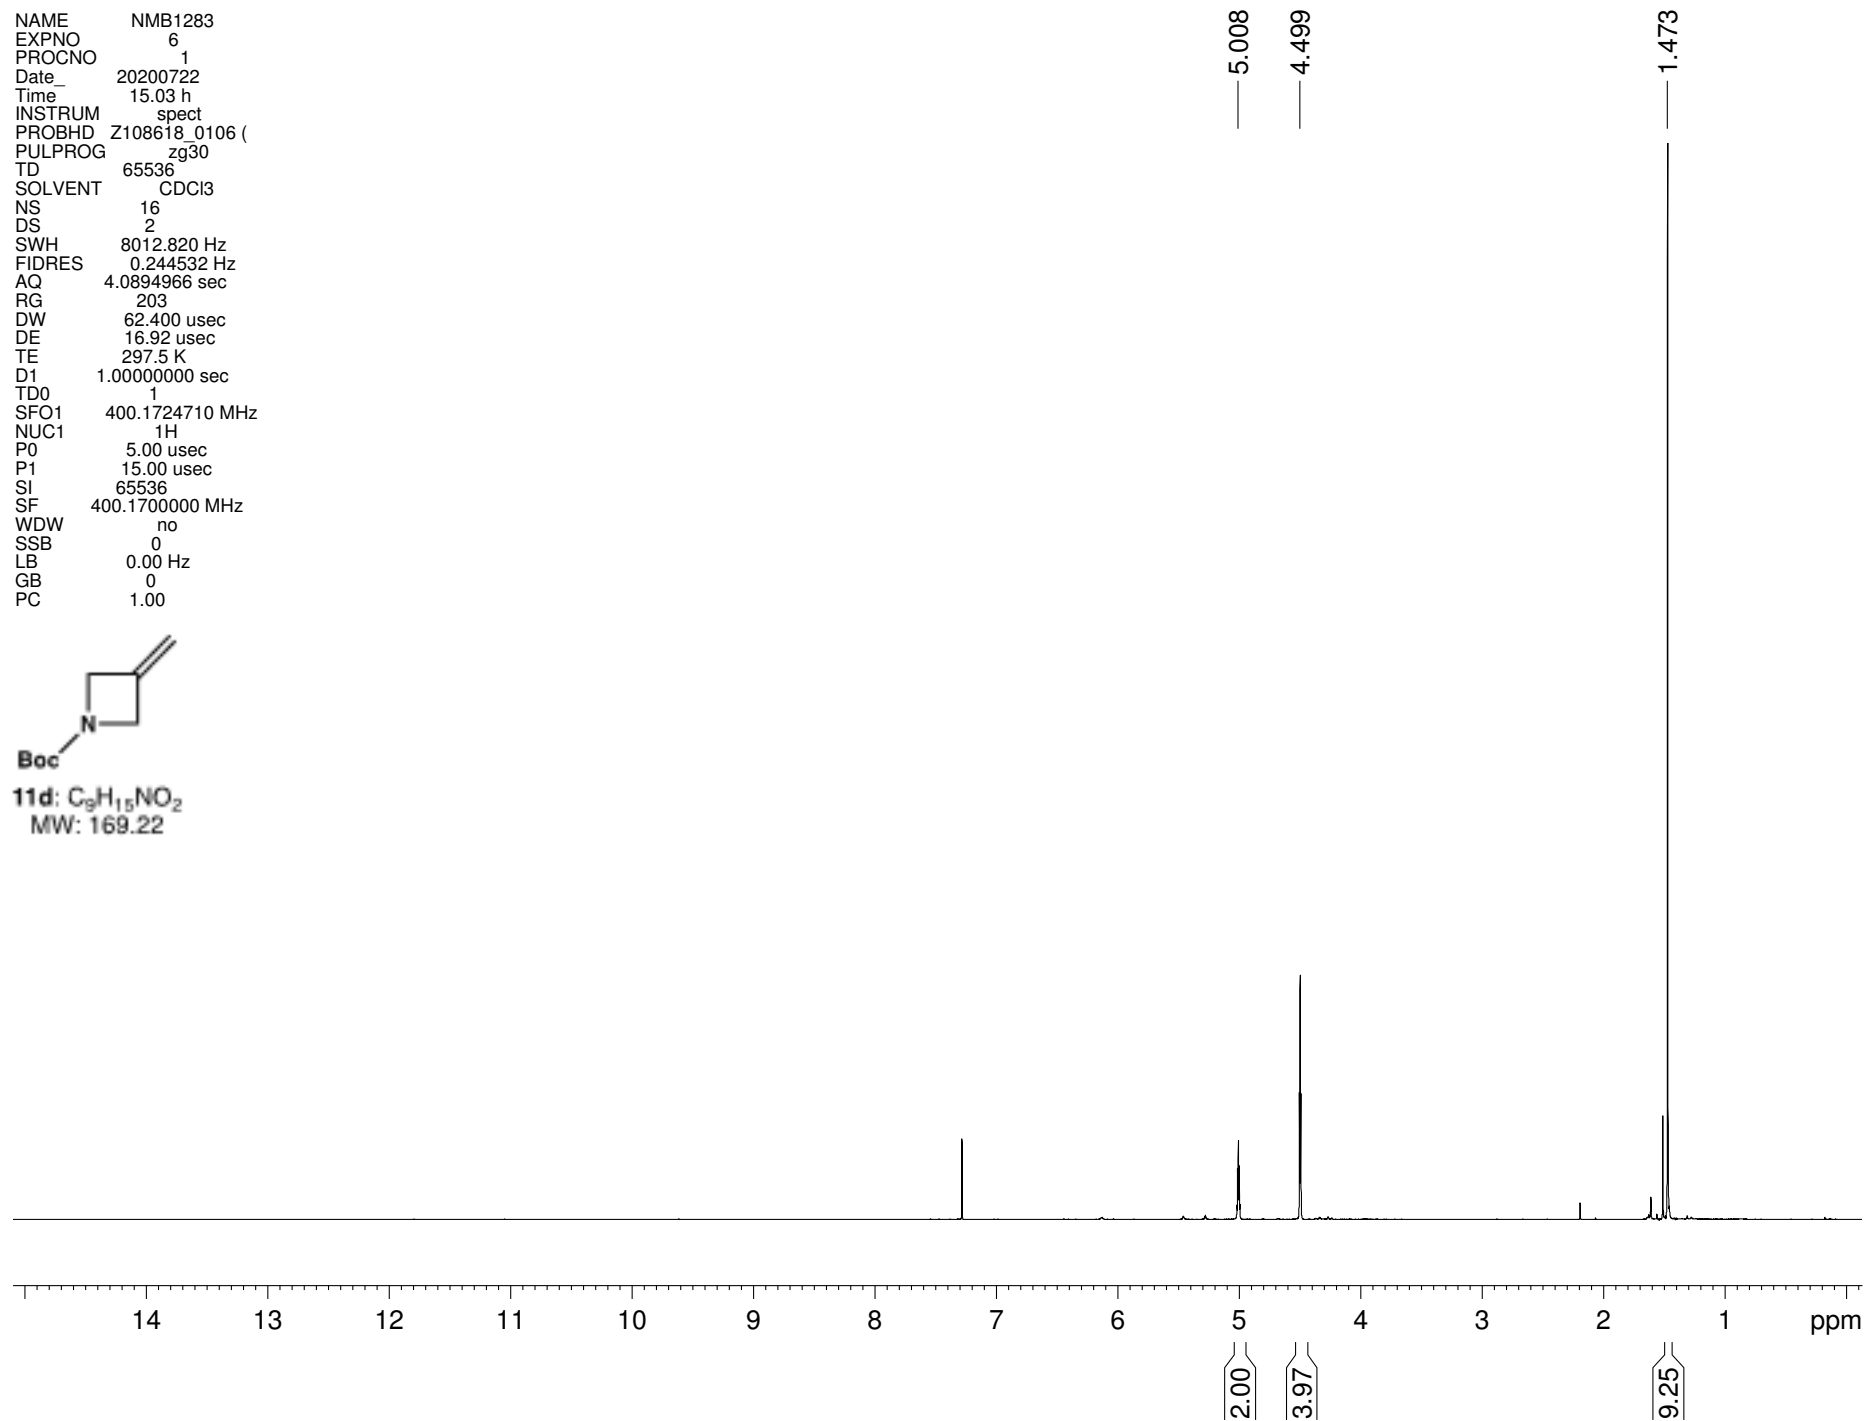

NAME SK1177 B 1H  
EXPNO 1  
PROCNO 1  
Date\_ 20200127  
Time 20.11 h  
INSTRUM spect  
PROBHD Z108618\_0106 (  
PULPROG zg30  
TD 65536  
SOLVENT CDCl3  
NS 16  
DS 2  
SWH 8012.820 Hz  
FIDRES 0.244532 Hz  
AQ 4.0894966 sec  
RG 203  
DW 62.400 usec  
DE 16.92 usec  
TE 294.8 K  
D1 1.00000000 sec  
TD0 1  
SFO1 400.1724710 MHz  
NUC1 1H  
P0 5.00 usec  
P1 15.00 usec  
SI 65536  
SF 400.1700000 MHz  
WDW EM  
SSB 0  
LB 0.30 Hz  
GB 0  
PC 1.00

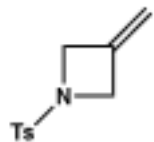

**11e**: C<sub>11</sub>H<sub>13</sub>NO<sub>2</sub>S  
MW: 223.29

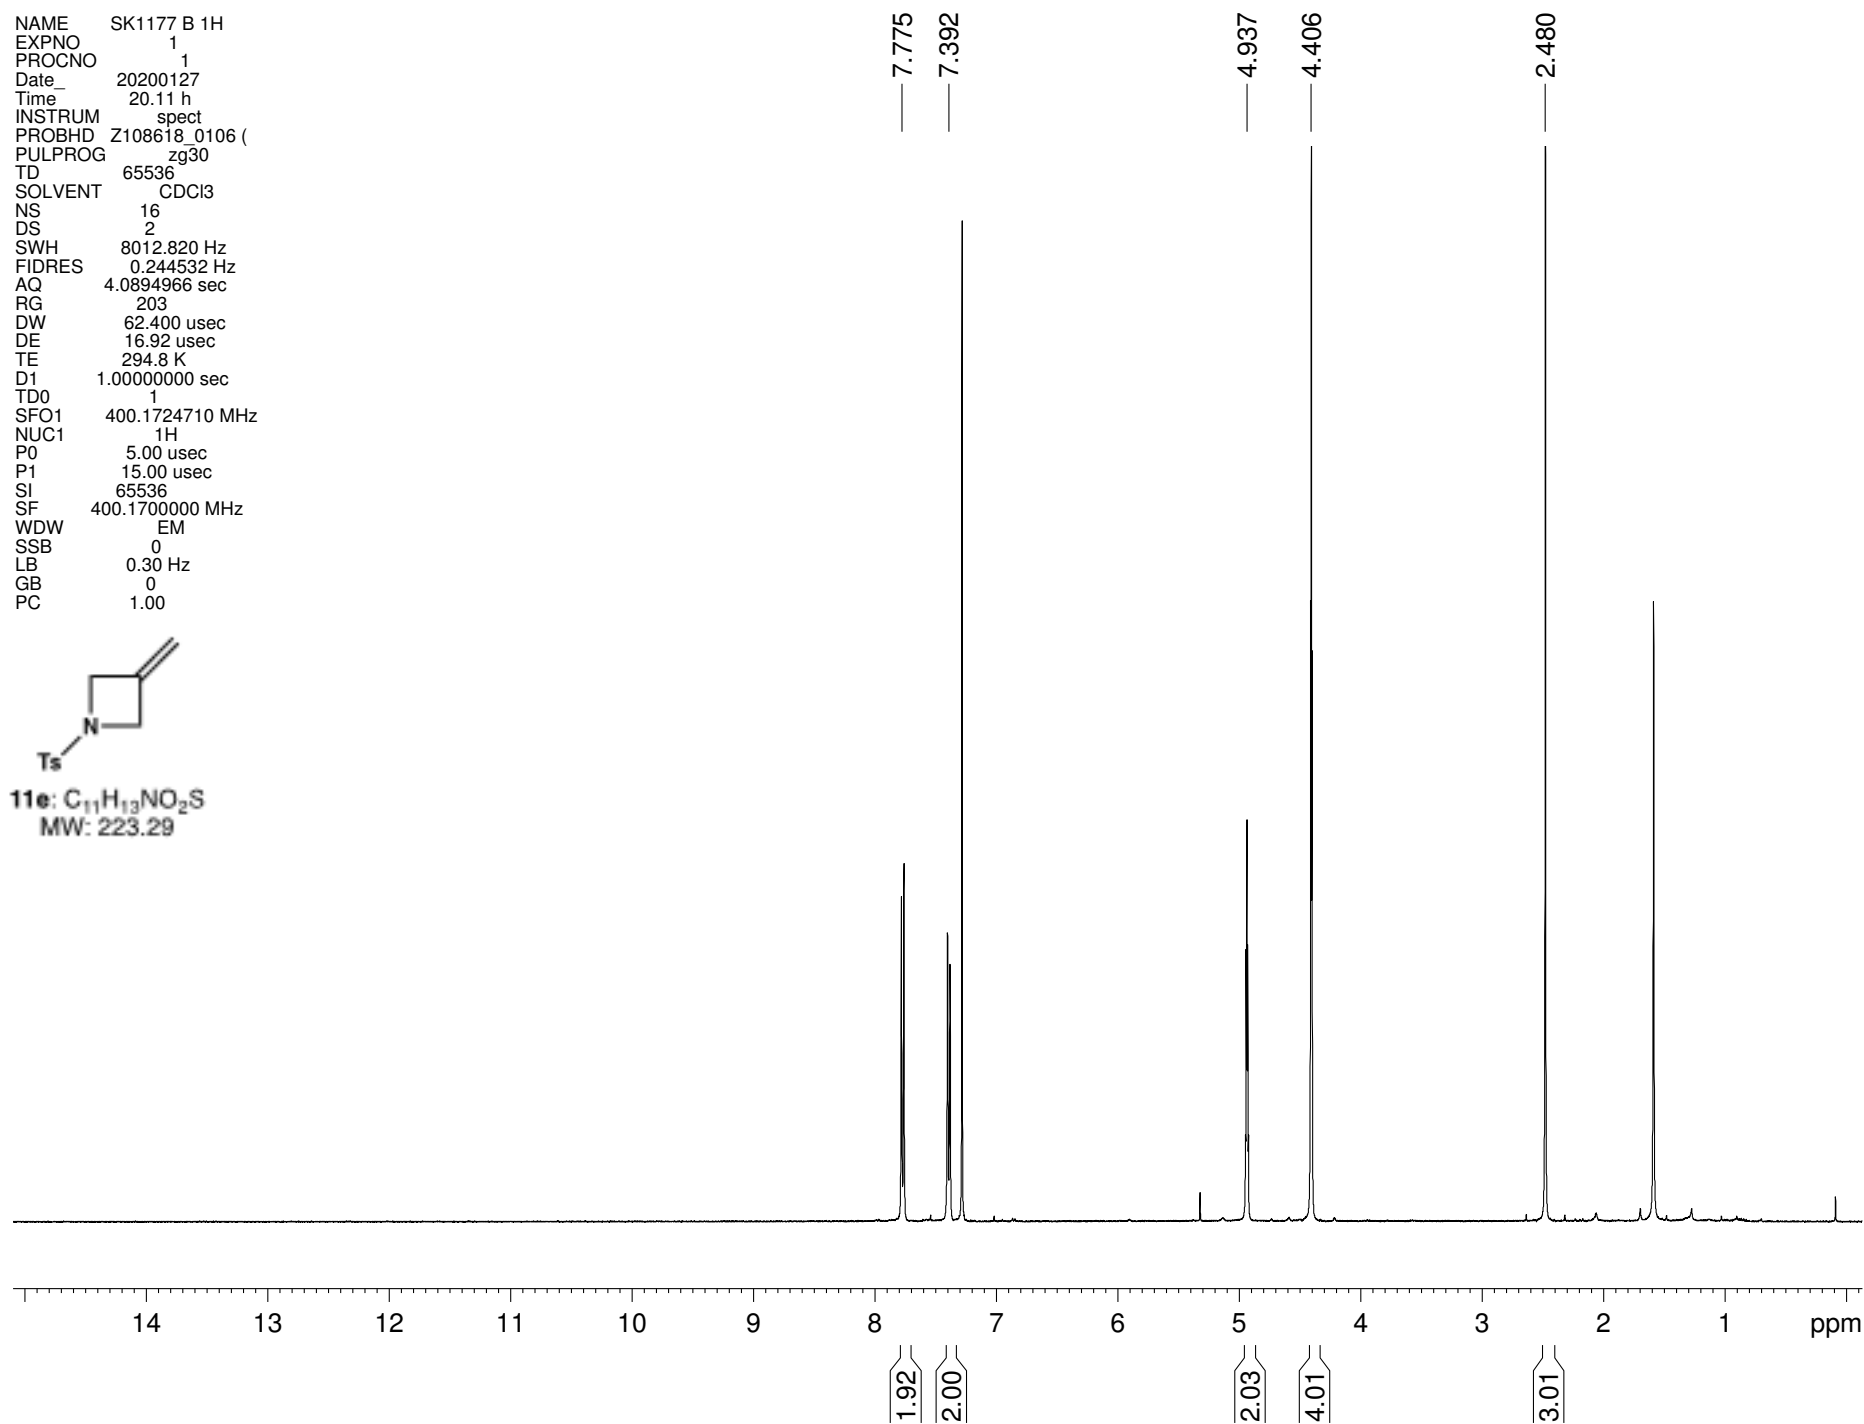

NAME NMB1227 13C  
EXPNO 1  
PROCNO 1  
Date\_ 20210121  
Time 16.29 h  
INSTRUM spect  
PROBHD Z108618\_0106 (  
PULPROG zgpg30  
TD 65536  
SOLVENT CDCl3  
NS 29  
DS 4  
SWH 24038.461 Hz  
FIDRES 0.733596 Hz  
AQ 1.3631988 sec  
RG 203  
DW 20.800 usec  
DE 6.50 usec  
TE 297.9 K  
D1 2.00000000 sec  
D11 0.03000000 sec  
TD0 1  
SFO1 100.6328888 MHz  
NUC1 13C  
P0 3.53 usec  
P1 10.60 usec  
SI 32768  
SF 100.6228280 MHz  
WDW EM  
SSB 0  
LB 1.00 Hz  
GB 0  
PC 1.40

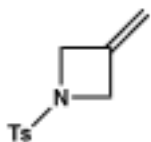

11e: C<sub>11</sub>H<sub>13</sub>NO<sub>2</sub>S  
MW: 223.29

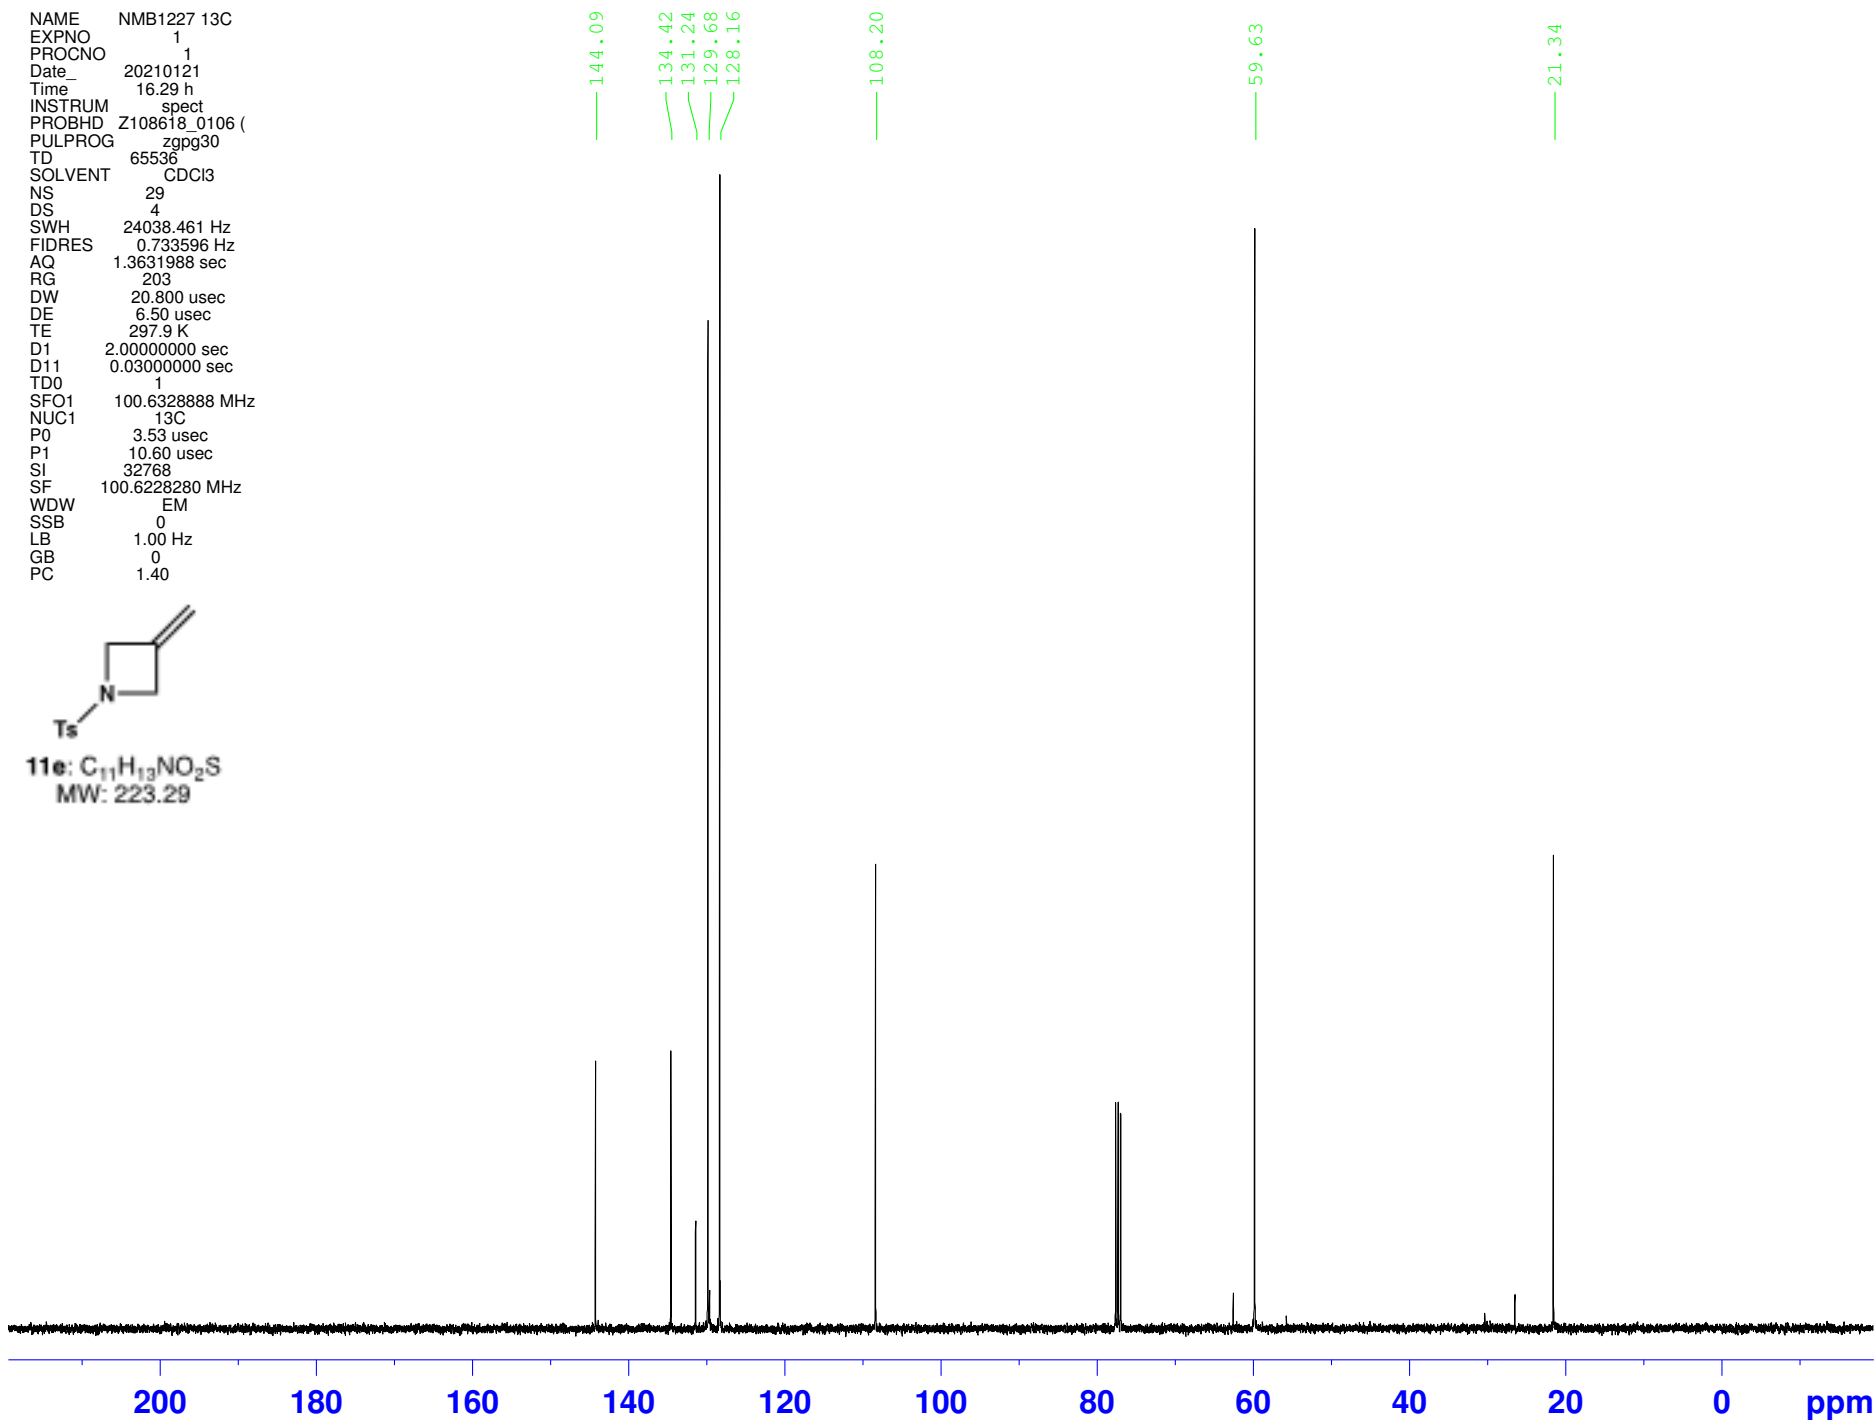

NAME NMB1284  
EXPNO 2  
PROCNO 1  
Date\_ 20200715  
Time 19.46 h  
INSTRUM spect  
PROBHD Z108618\_0106 (  
PULPROG zg30  
TD 65536  
SOLVENT CDCl3  
NS 16  
DS 2  
SWH 8012.820 Hz  
FIDRES 0.244532 Hz  
AQ 4.0894966 sec  
RG 203  
DW 62.400 usec  
DE 16.92 usec  
TE 297.8 K  
D1 1.00000000 sec  
TD0 1  
SFO1 400.1724710 MHz  
NUC1 1H  
P0 5.00 usec  
P1 15.00 usec  
SI 65536  
SF 400.1700000 MHz  
WDW no  
SSB 0  
LB 0.00 Hz  
GB 0  
PC 1.00

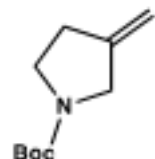

11f: C<sub>10</sub>H<sub>17</sub>NO<sub>2</sub>  
MW: 183.25

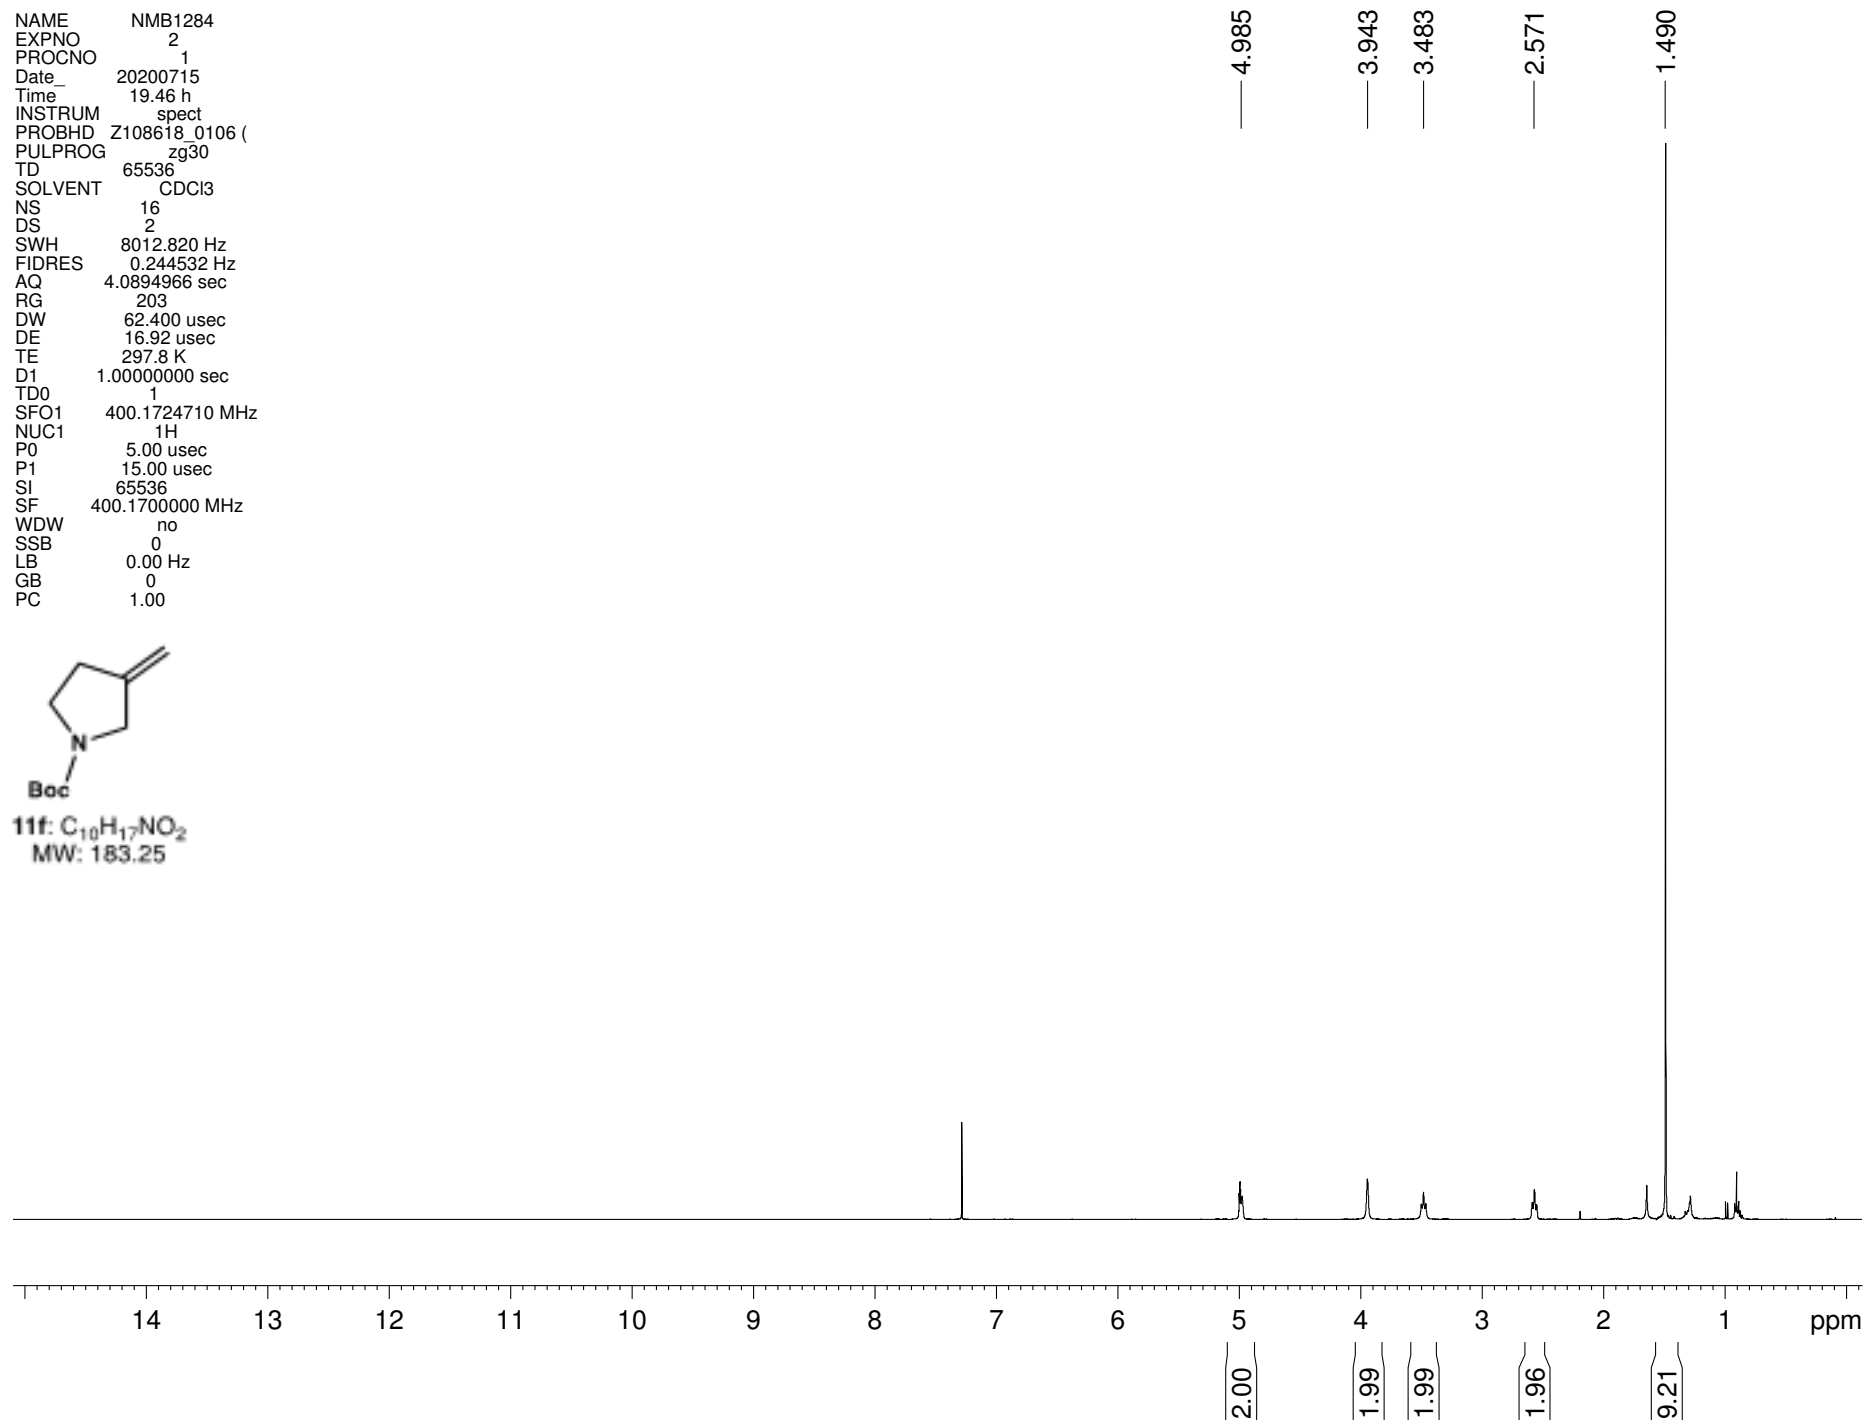



NAME NMB1304  
 EXPNO 6  
 PROCNO 1  
 Date\_ 20200824  
 Time 13.23 h  
 INSTRUM spect  
 PROBHD Z847801\_0093 (  
 PULPROG zg30  
 TD 65536  
 SOLVENT CDCl3  
 NS 16  
 DS 2  
 SWH 12019.230 Hz  
 FIDRES 0.366798 Hz  
 AQ 2.7263477 sec  
 RG 203  
 DW 41.600 usec  
 DE 10.42 usec  
 TE 299.0 K  
 D1 1.00000000 sec  
 TD0 1  
 SFO1 600.1337058 MHz  
 NUC1 1H  
 P0 5.00 usec  
 P1 15.00 usec  
 SI 65536  
 SF 600.1300000 MHz  
 WDW no  
 SSB 0  
 LB 0.00 Hz  
 GB 0  
 PC 1.00

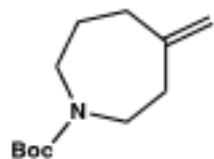

**11g**: C<sub>12</sub>H<sub>21</sub>NO<sub>2</sub>  
 MW: 211.31

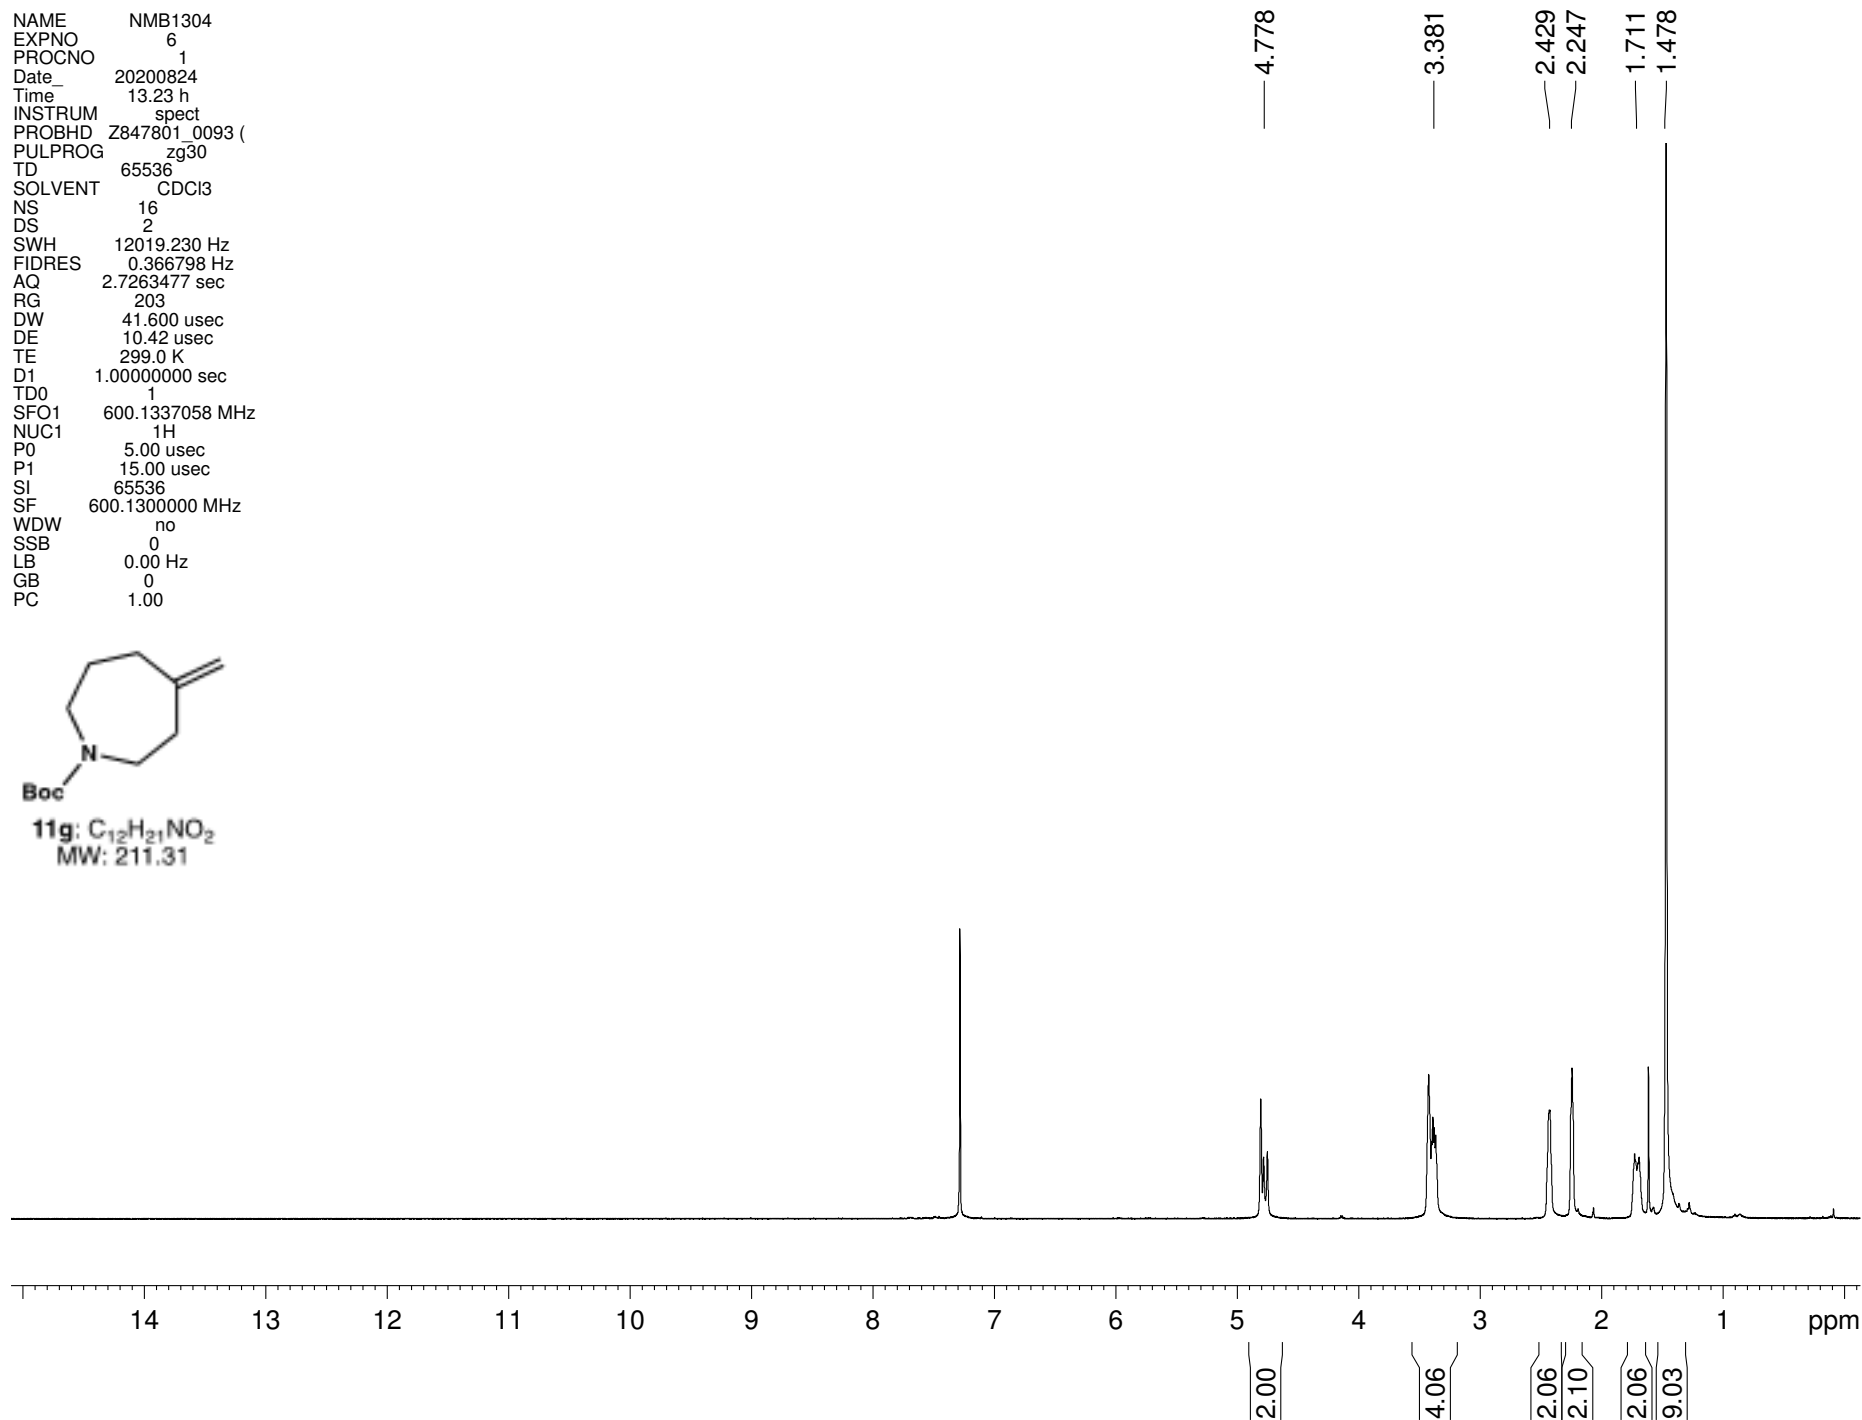

NAME NMB1234 1H  
EXPNO 1  
PROCNO 1  
Date\_ 20201222  
Time 16.50 h  
INSTRUM spect  
PROBHD Z108618\_0106 (  
PULPROG zg30  
TD 65536  
SOLVENT CDCl3  
NS 16  
DS 2  
SWH 8012.820 Hz  
FIDRES 0.244532 Hz  
AQ 4.0894966 sec  
RG 203  
DW 62.400 usec  
DE 16.92 usec  
TE 297.6 K  
D1 1.00000000 sec  
TD0 1  
SFO1 400.1724710 MHz  
NUC1 1H  
P0 5.00 usec  
P1 15.00 usec  
SI 65536  
SF 400.1700000 MHz  
WDW no  
SSB 0  
LB 0.00 Hz  
GB 0  
PC 1.00

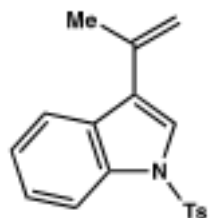

11o: C<sub>18</sub>H<sub>17</sub>NO<sub>2</sub>S  
MW: 311.40

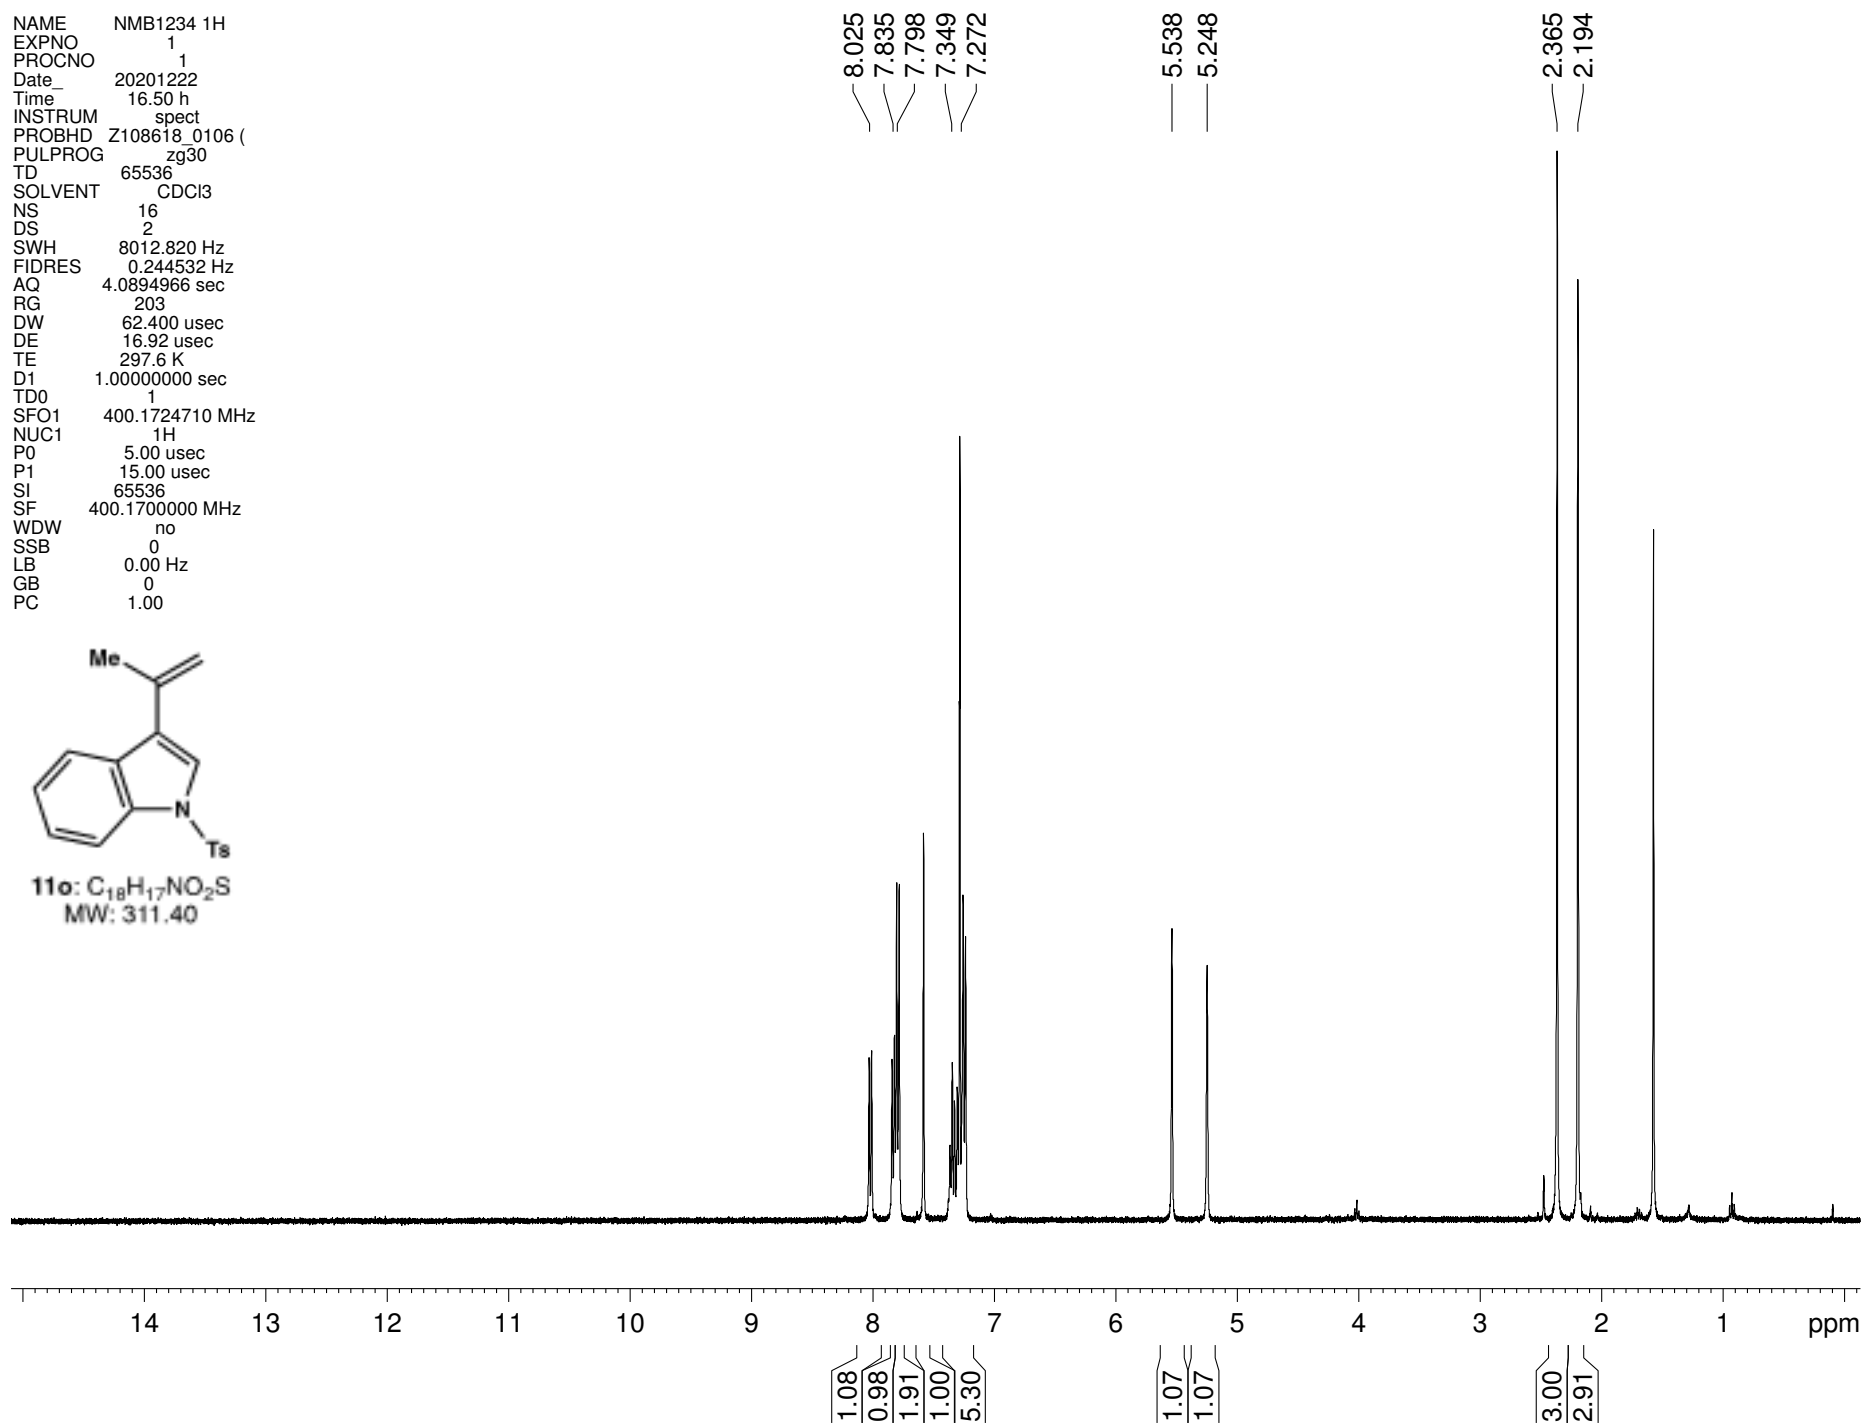

NAME NMB1234 13C  
EXPNO 1  
PROCNO 1  
Date\_ 20201225  
Time\_ 17.14 h  
INSTRUM spect  
PROBHD Z108618\_0106 (  
PULPROG zgpg30  
TD 65536  
SOLVENT CDCl3  
NS 107  
DS 4  
SWH 24038.461 Hz  
FIDRES 0.733596 Hz  
AQ 1.3631988 sec  
RG 203  
DW 20.800 usec  
DE 6.50 usec  
TE 297.6 K  
D1 2.00000000 sec  
D11 0.03000000 sec  
TD0 1  
SFO1 100.6328888 MHz  
NUC1 13C  
P0 3.53 usec  
P1 10.60 usec  
SI 32768  
SF 100.6228280 MHz  
WDW EM  
SSB 0  
LB 1.00 Hz  
GB 0  
PC 1.40

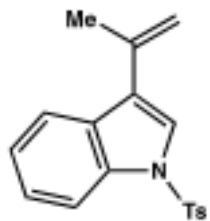

11o: C<sub>18</sub>H<sub>17</sub>NO<sub>2</sub>S  
MW: 311.40

145.08  
136.26  
135.67  
135.24  
129.98  
128.98  
126.91  
124.77  
124.04  
123.69  
123.59  
121.45  
113.82  
113.80

23.14  
21.59

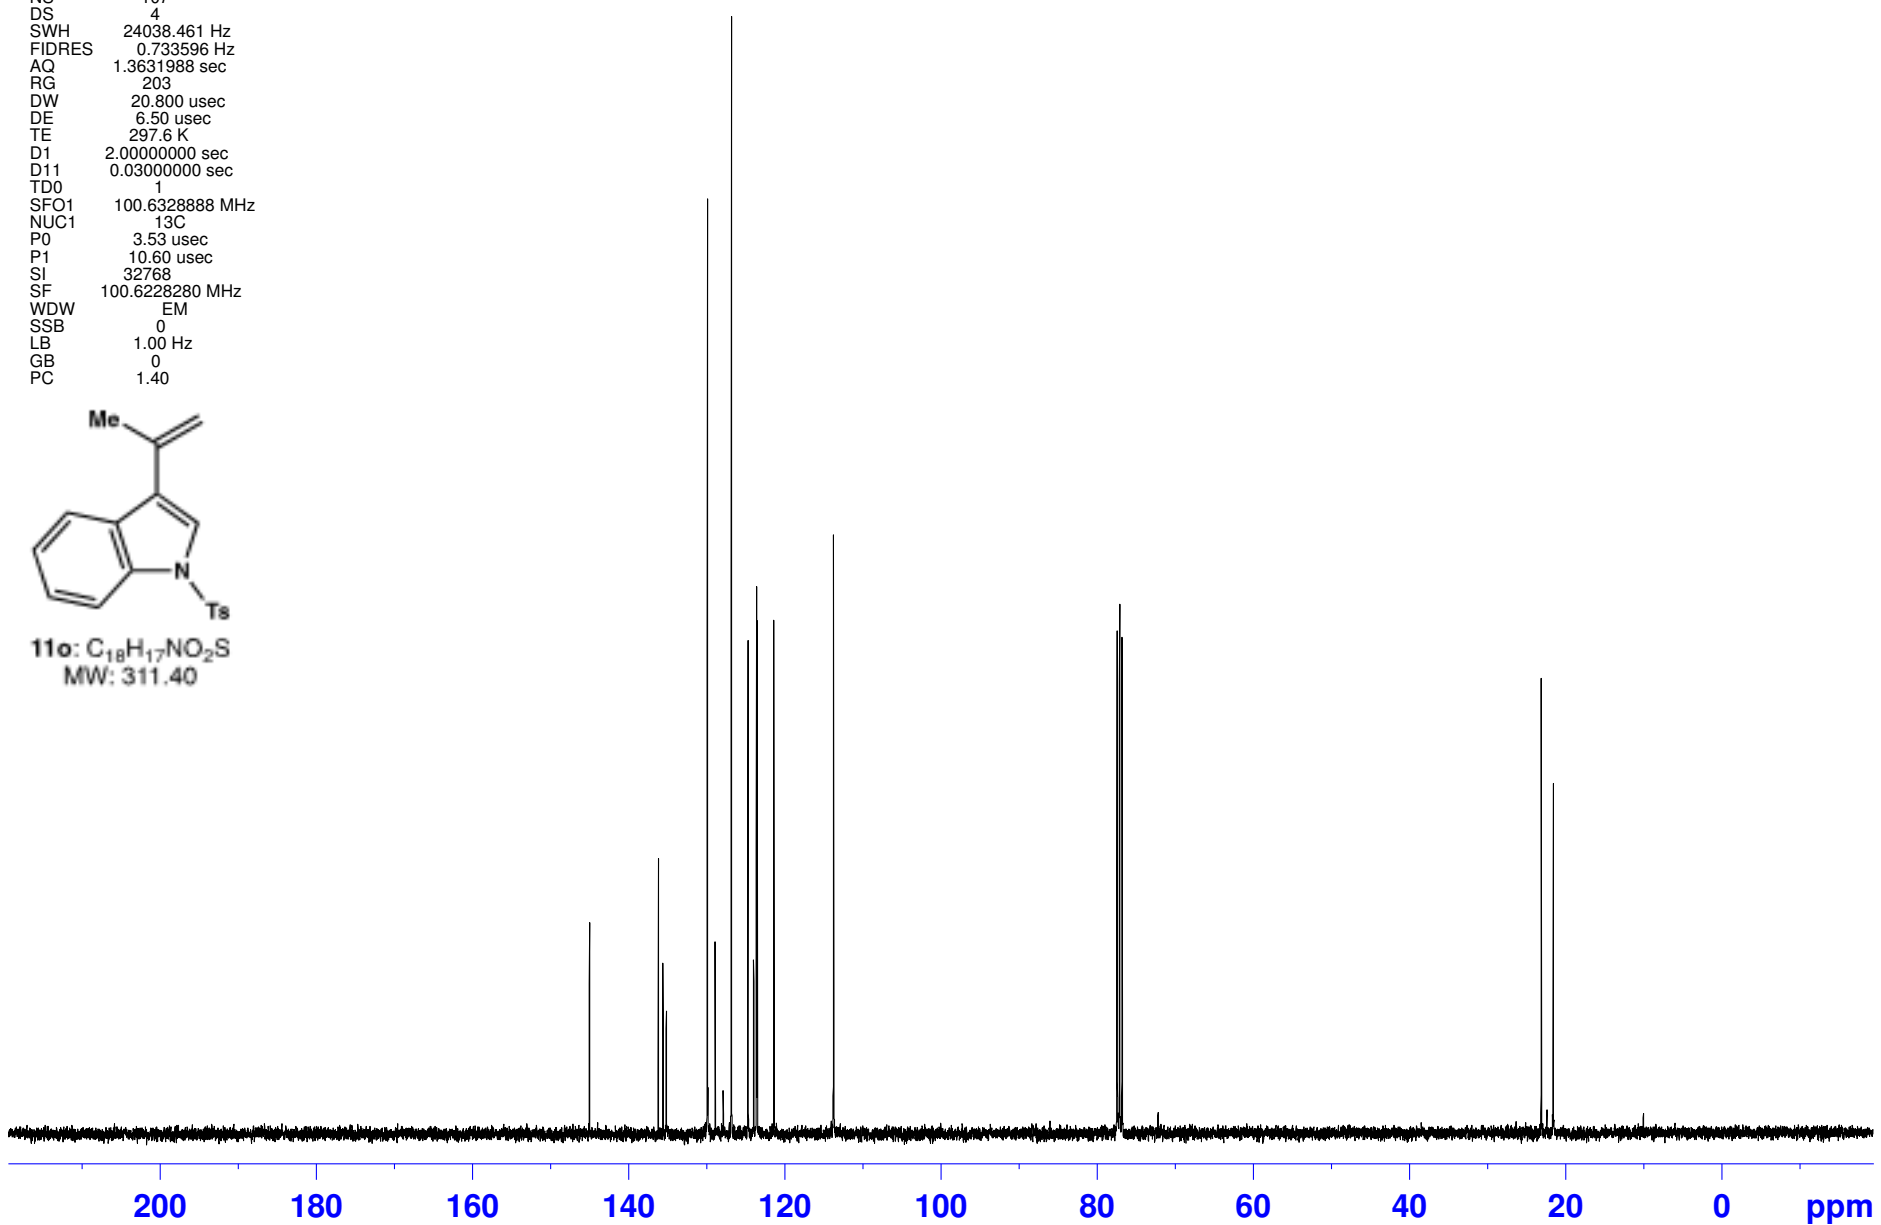

NAME NMB1221  
EXPNO 3  
PROCNO 1  
Date\_ 20200323  
Time 16.03 h  
INSTRUM spect  
PROBHD Z108618\_0106 (  
PULPROG zg30  
TD 65536  
SOLVENT CDCl3  
NS 16  
DS 2  
SWH 8012.820 Hz  
FIDRES 0.244532 Hz  
AQ 4.0894966 sec  
RG 203  
DW 62.400 usec  
DE 16.92 usec  
TE 295.4 K  
D1 1.00000000 sec  
TD0 1  
SFO1 400.1724710 MHz  
NUC1 1H  
P0 5.00 usec  
P1 15.00 usec  
SI 65536  
SF 400.1700000 MHz  
WDW no  
SSB 0  
LB 0.00 Hz  
GB 0  
PC 1.00

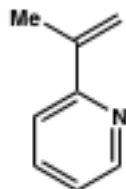

**11p:** C<sub>8</sub>H<sub>9</sub>N  
MW: 119.17

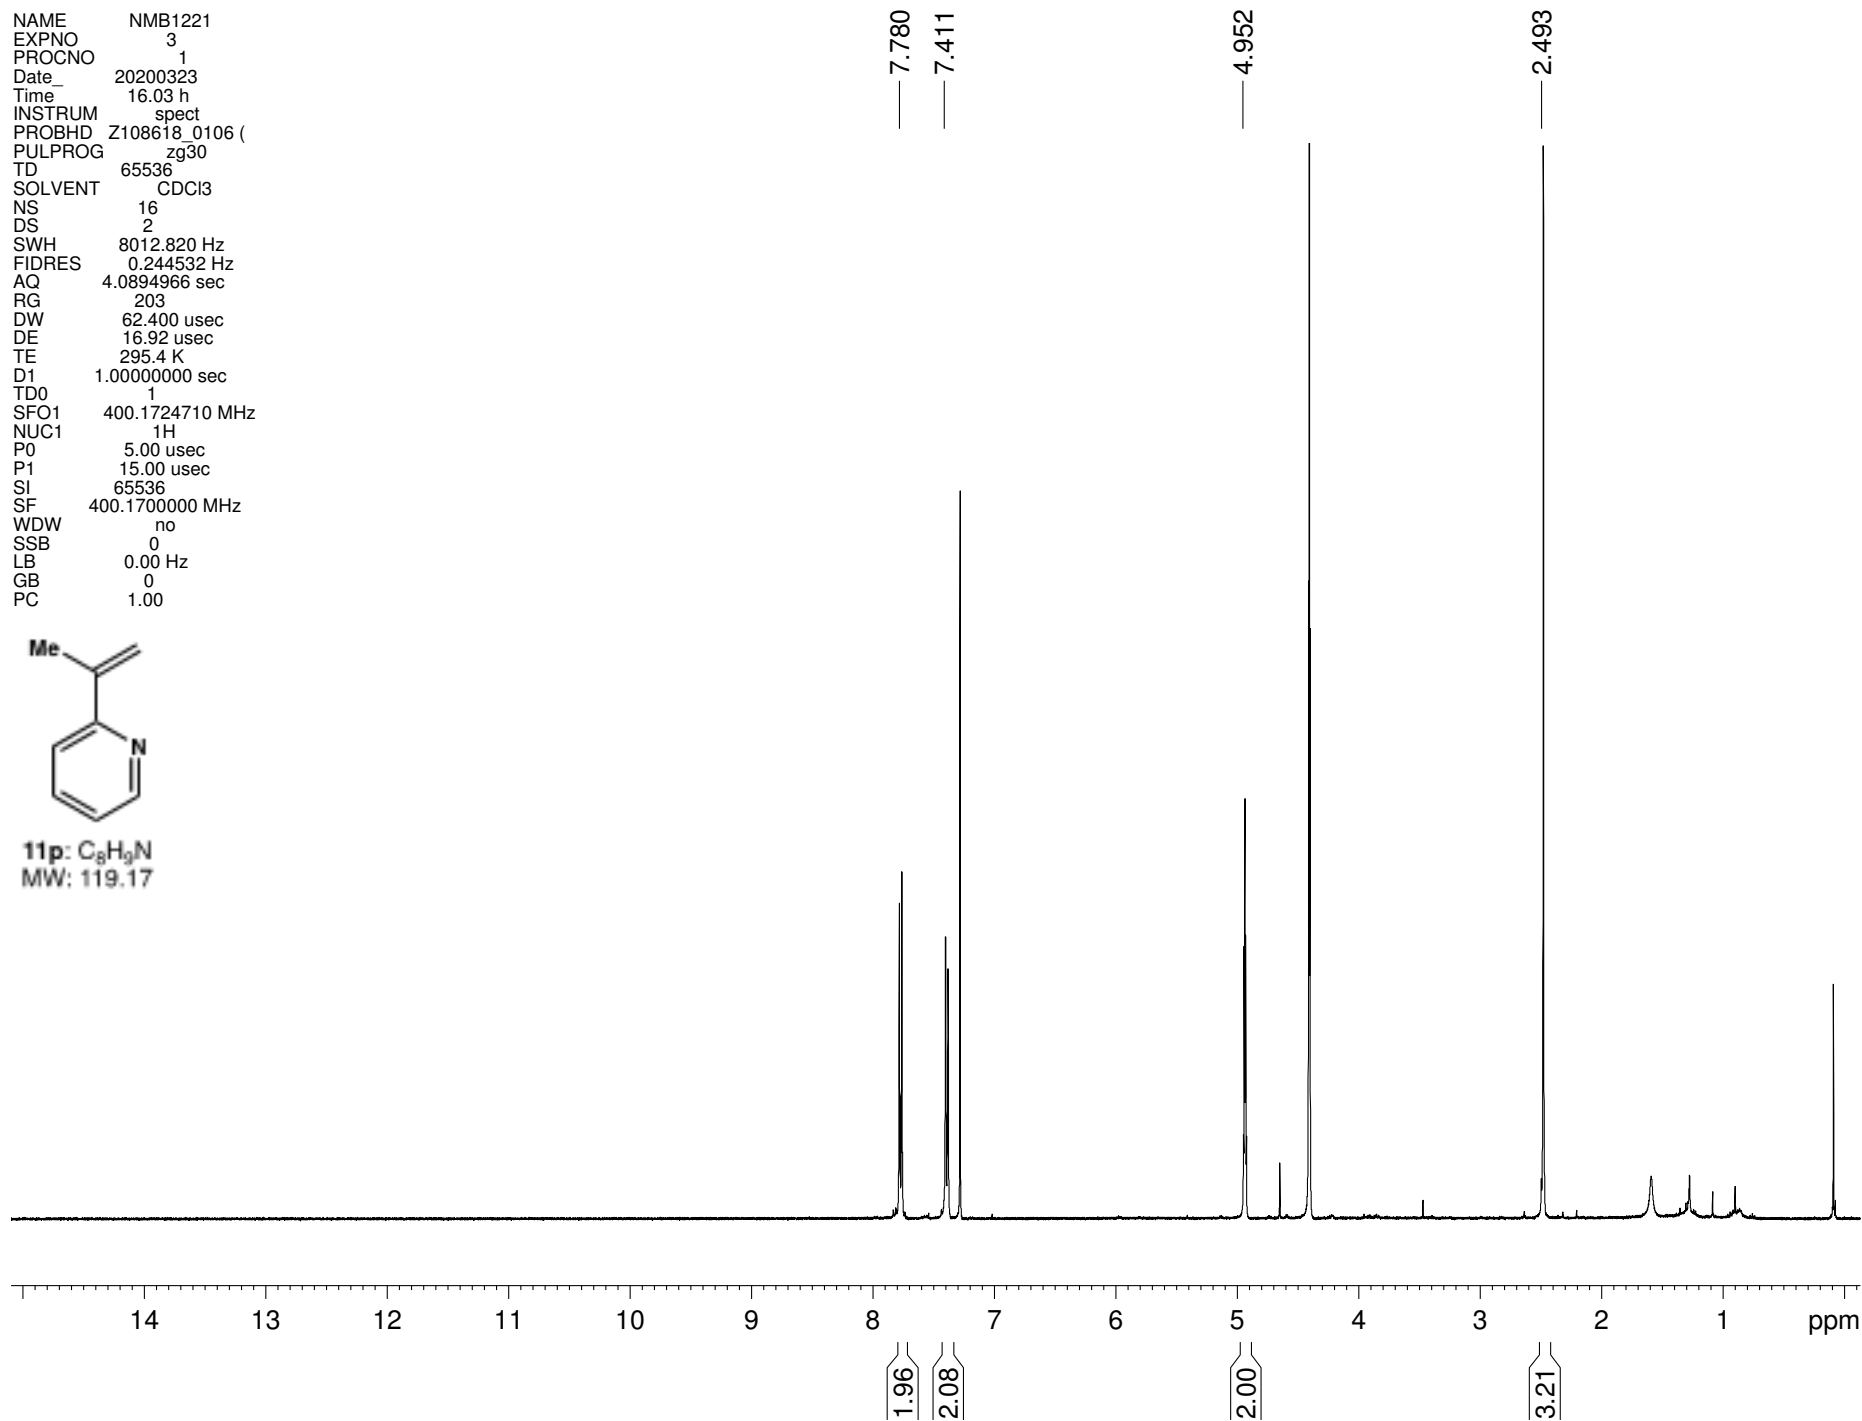

NAME NMB2115 B  
EXPNO 1  
PROCNO 1  
Date\_ 20201214  
Time 17.04 h  
INSTRUM spect  
PROBHD Z108618\_0106 (  
PULPROG zg30  
TD 65536  
SOLVENT CDCl3  
NS 16  
DS 2  
SWH 8012.820 Hz  
FIDRES 0.244532 Hz  
AQ 4.0894966 sec  
RG 203  
DW 62.400 usec  
DE 16.92 usec  
TE 297.6 K  
D1 1.00000000 sec  
TD0 1  
SFO1 400.1724710 MHz  
NUC1 1H  
P0 5.00 usec  
P1 15.00 usec  
SI 65536  
SF 400.1700000 MHz  
WDW no  
SSB 0  
LB 0.00 Hz  
GB 0  
PC 1.00

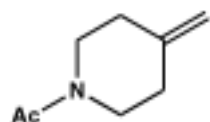

**11b**: C<sub>8</sub>H<sub>13</sub>NO  
MW: 139.20

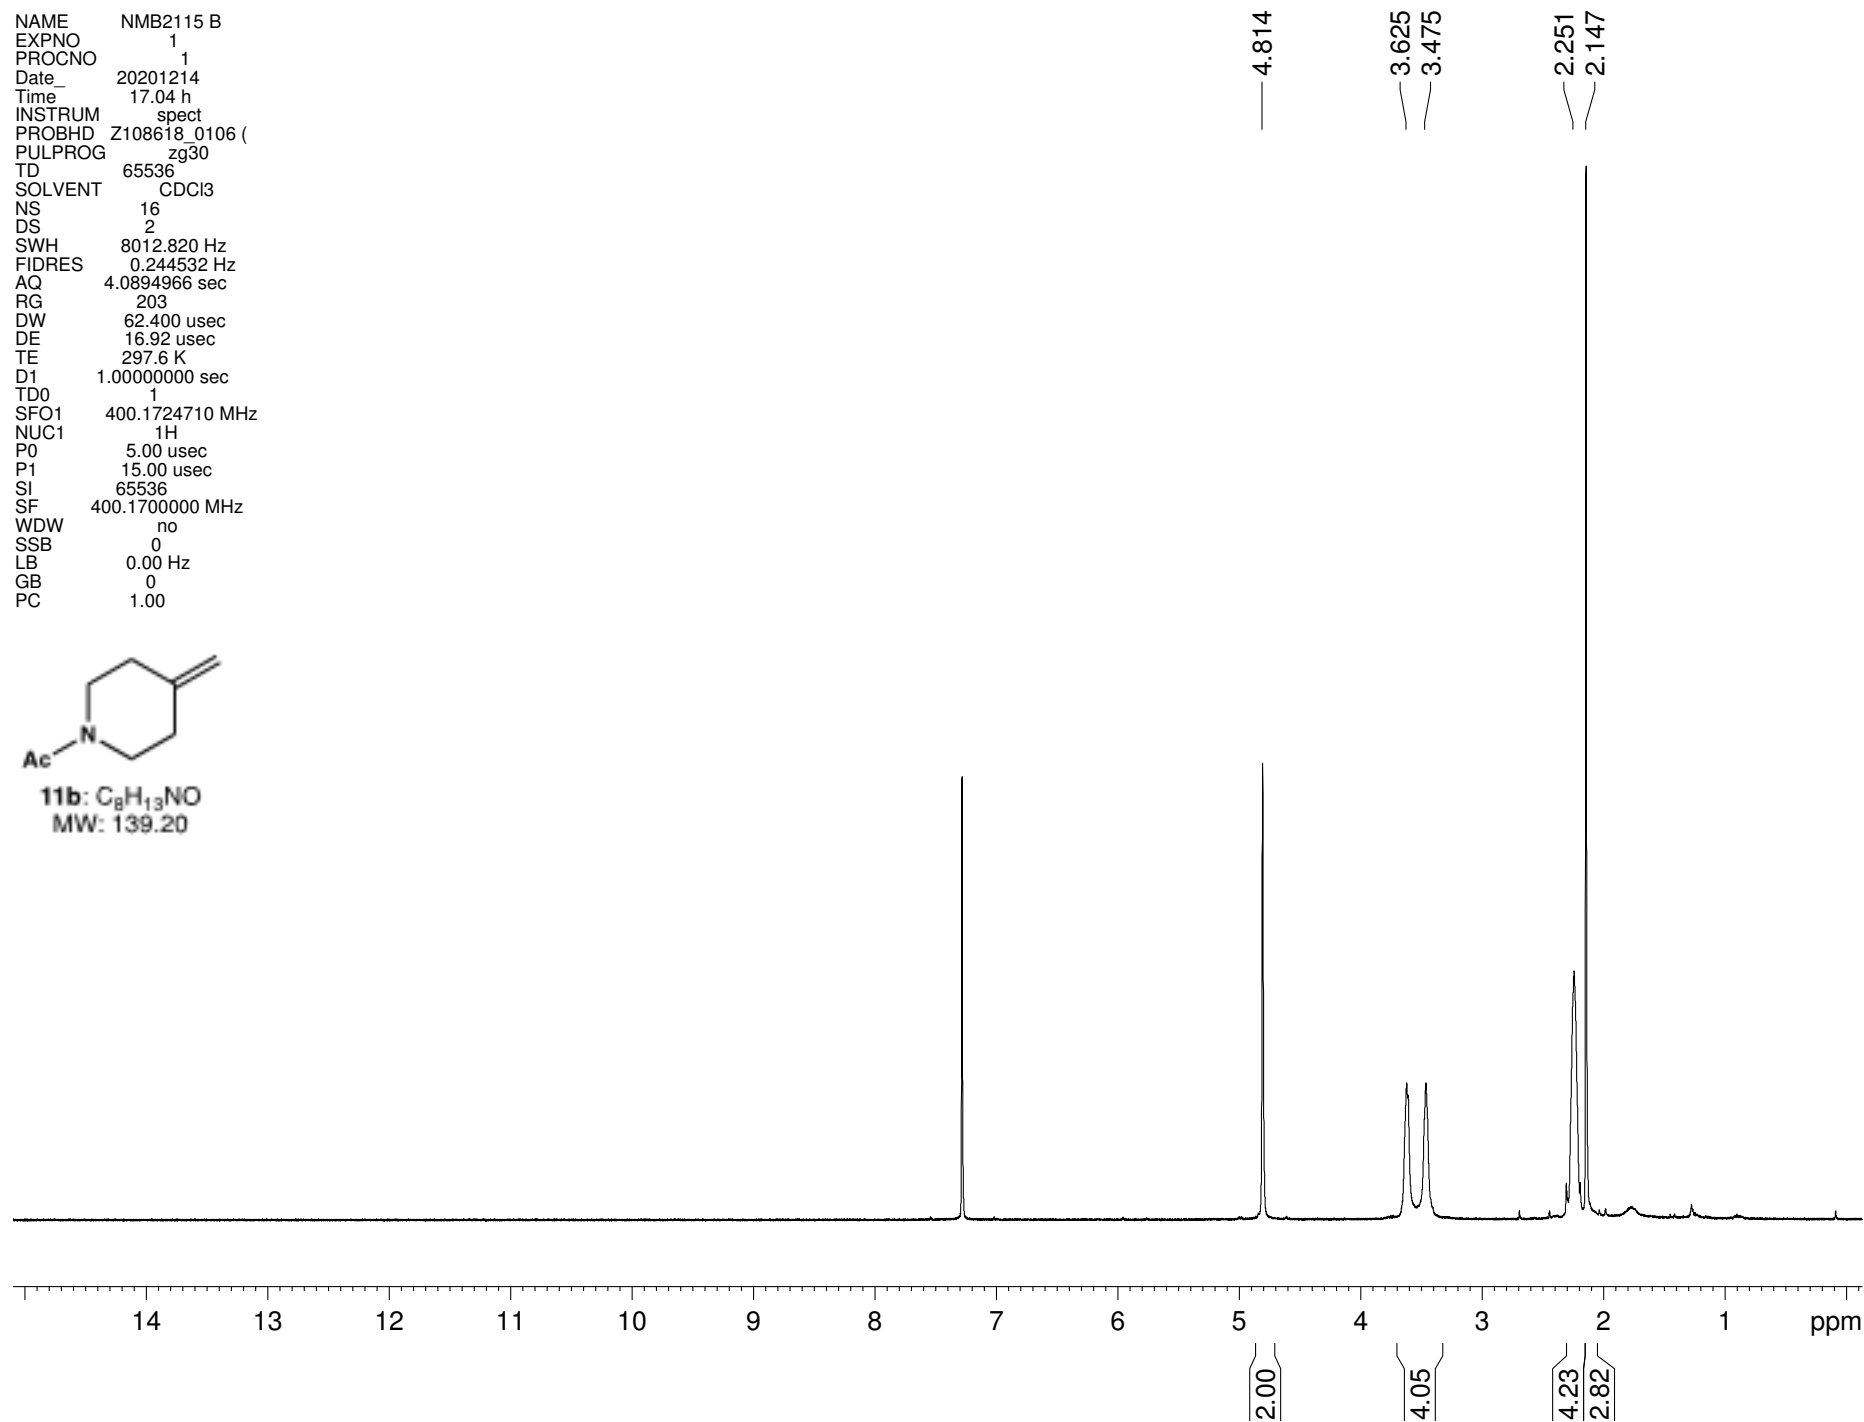

NAME JAL10027A 1H  
 EXPNO 1  
 PROCNO 1  
 Date\_ 20201214  
 Time 17.22 h  
 INSTRUM spect  
 PROBHD Z108618\_0106 (  
 PULPROG zg30  
 TD 65536  
 SOLVENT CDCl3  
 NS 16  
 DS 2  
 SWH 8012.820 Hz  
 FIDRES 0.244532 Hz  
 AQ 4.0894966 sec  
 RG 203  
 DW 62.400 usec  
 DE 16.92 usec  
 TE 297.9 K  
 D1 1.00000000 sec  
 TD0 1  
 SFO1 400.1724710 MHz  
 NUC1 1H  
 P0 5.00 usec  
 P1 15.00 usec  
 SI 65536  
 SF 400.1700000 MHz  
 WDW EM  
 SSB 0  
 LB 0.30 Hz  
 GB 0  
 PC 1.00

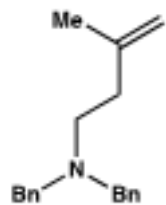

**11n: C<sub>19</sub>H<sub>23</sub>N**  
**MW: 265.40**

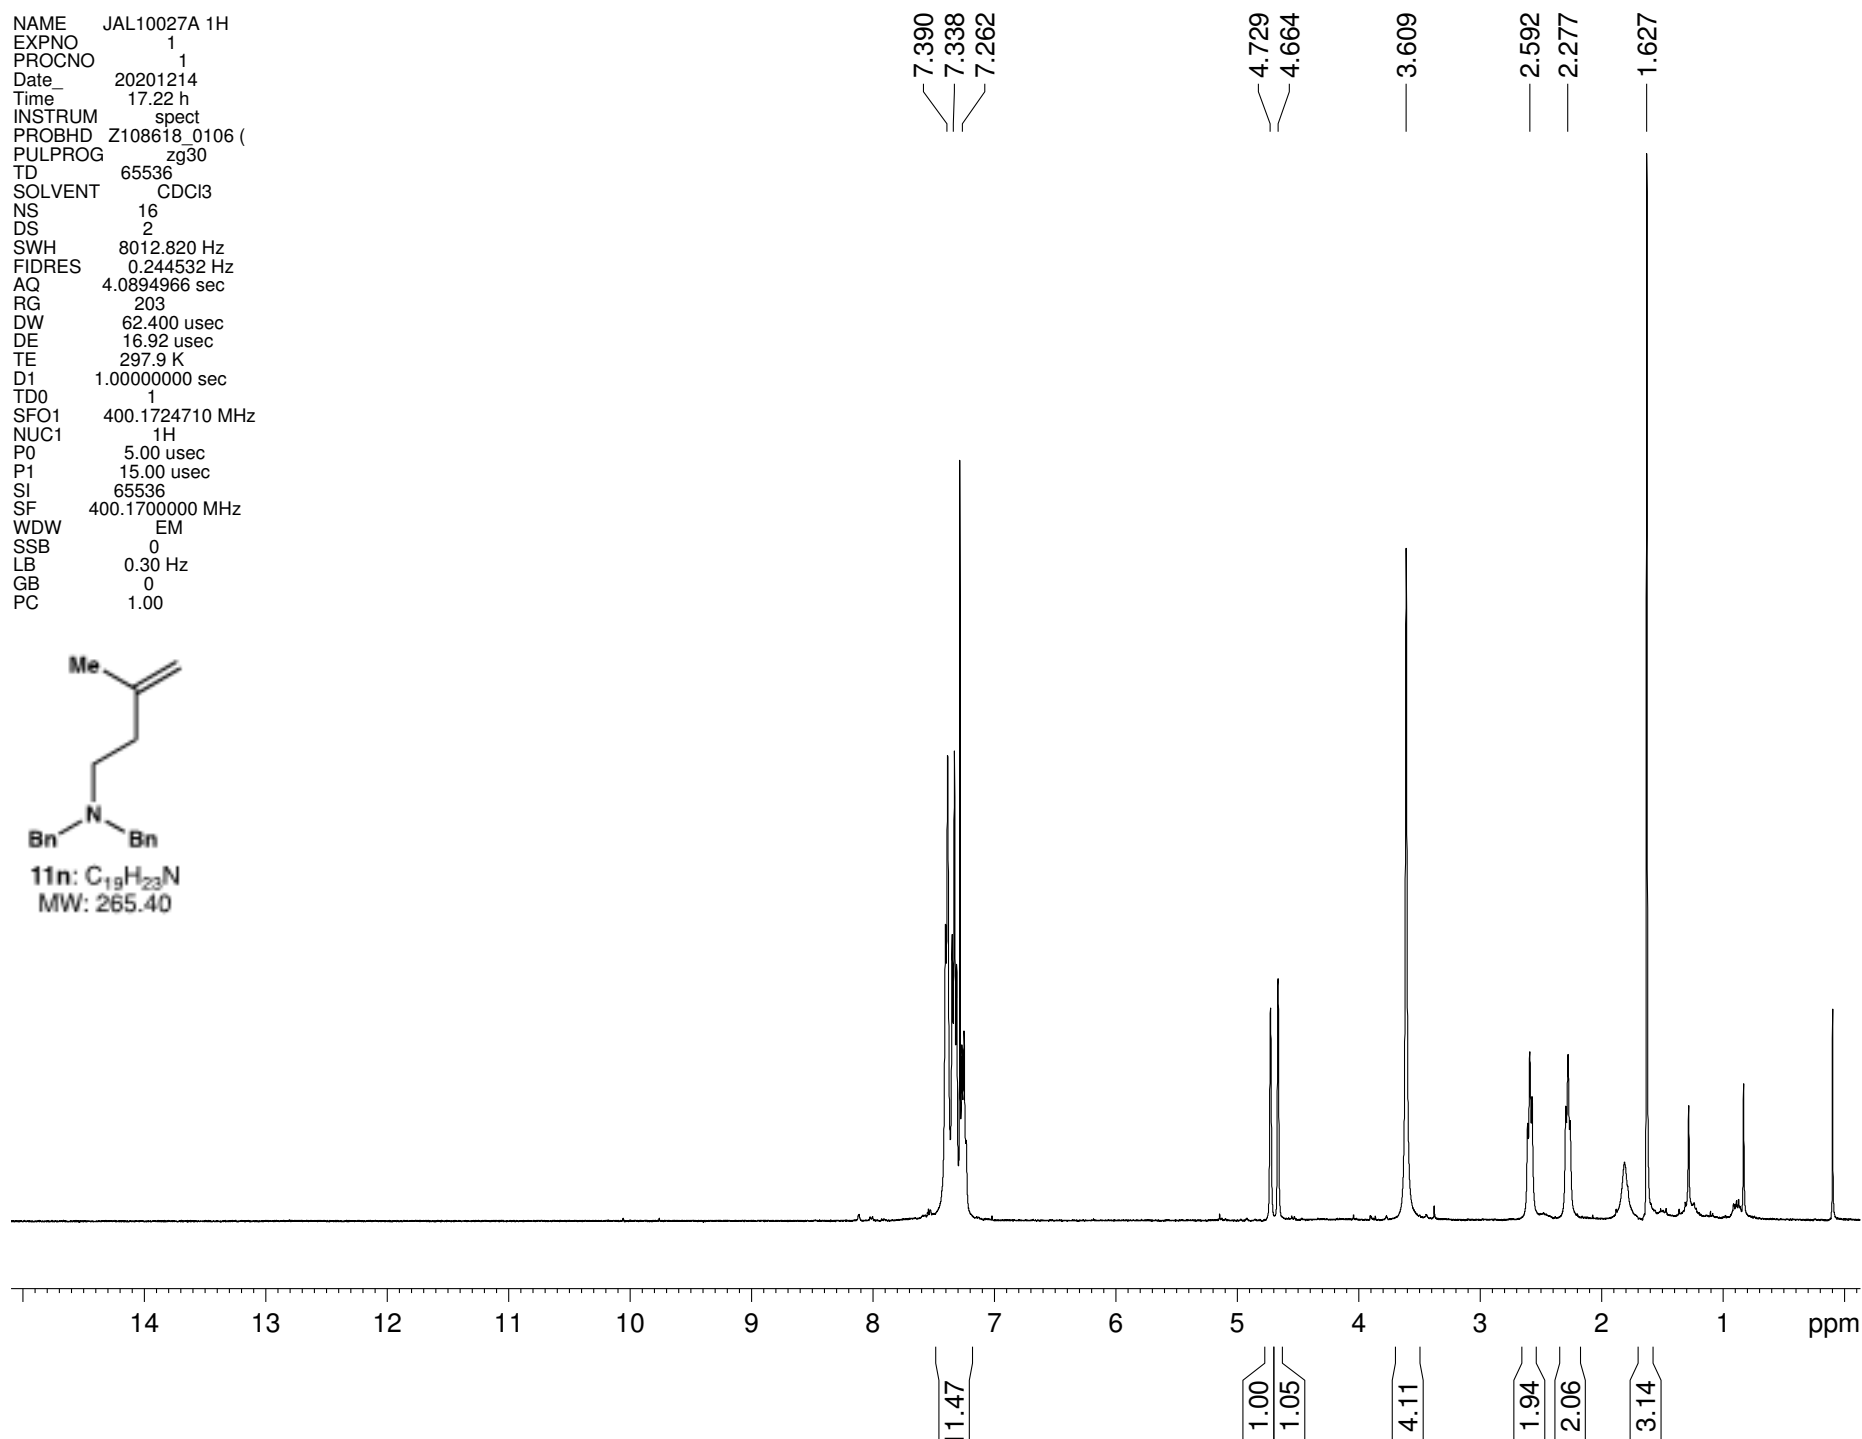

NAME JAL10011A 13C  
EXPNO 1  
PROCNO 1  
Date\_ 20201219  
Time 11.25 h  
INSTRUM spect  
PROBHD Z108618\_0106 (  
PULPROG zgpg30  
TD 65536  
SOLVENT CDCl3  
NS 10  
DS 4  
SWH 24038.461 Hz  
FIDRES 0.733596 Hz  
AQ 1.3631988 sec  
RG 203  
DW 20.800 usec  
DE 6.50 usec  
TE 297.9 K  
D1 2.00000000 sec  
D11 0.03000000 sec  
TD0 1  
SFO1 100.6328888 MHz  
NUC1 13C  
P0 3.53 usec  
P1 10.60 usec  
SI 32768  
SF 100.6228280 MHz  
WDW EM  
SSB 0  
LB 1.00 Hz  
GB 0  
PC 1.40

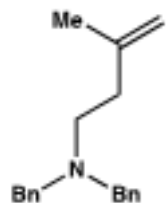

11n: C<sub>19</sub>H<sub>23</sub>N  
MW: 265.40

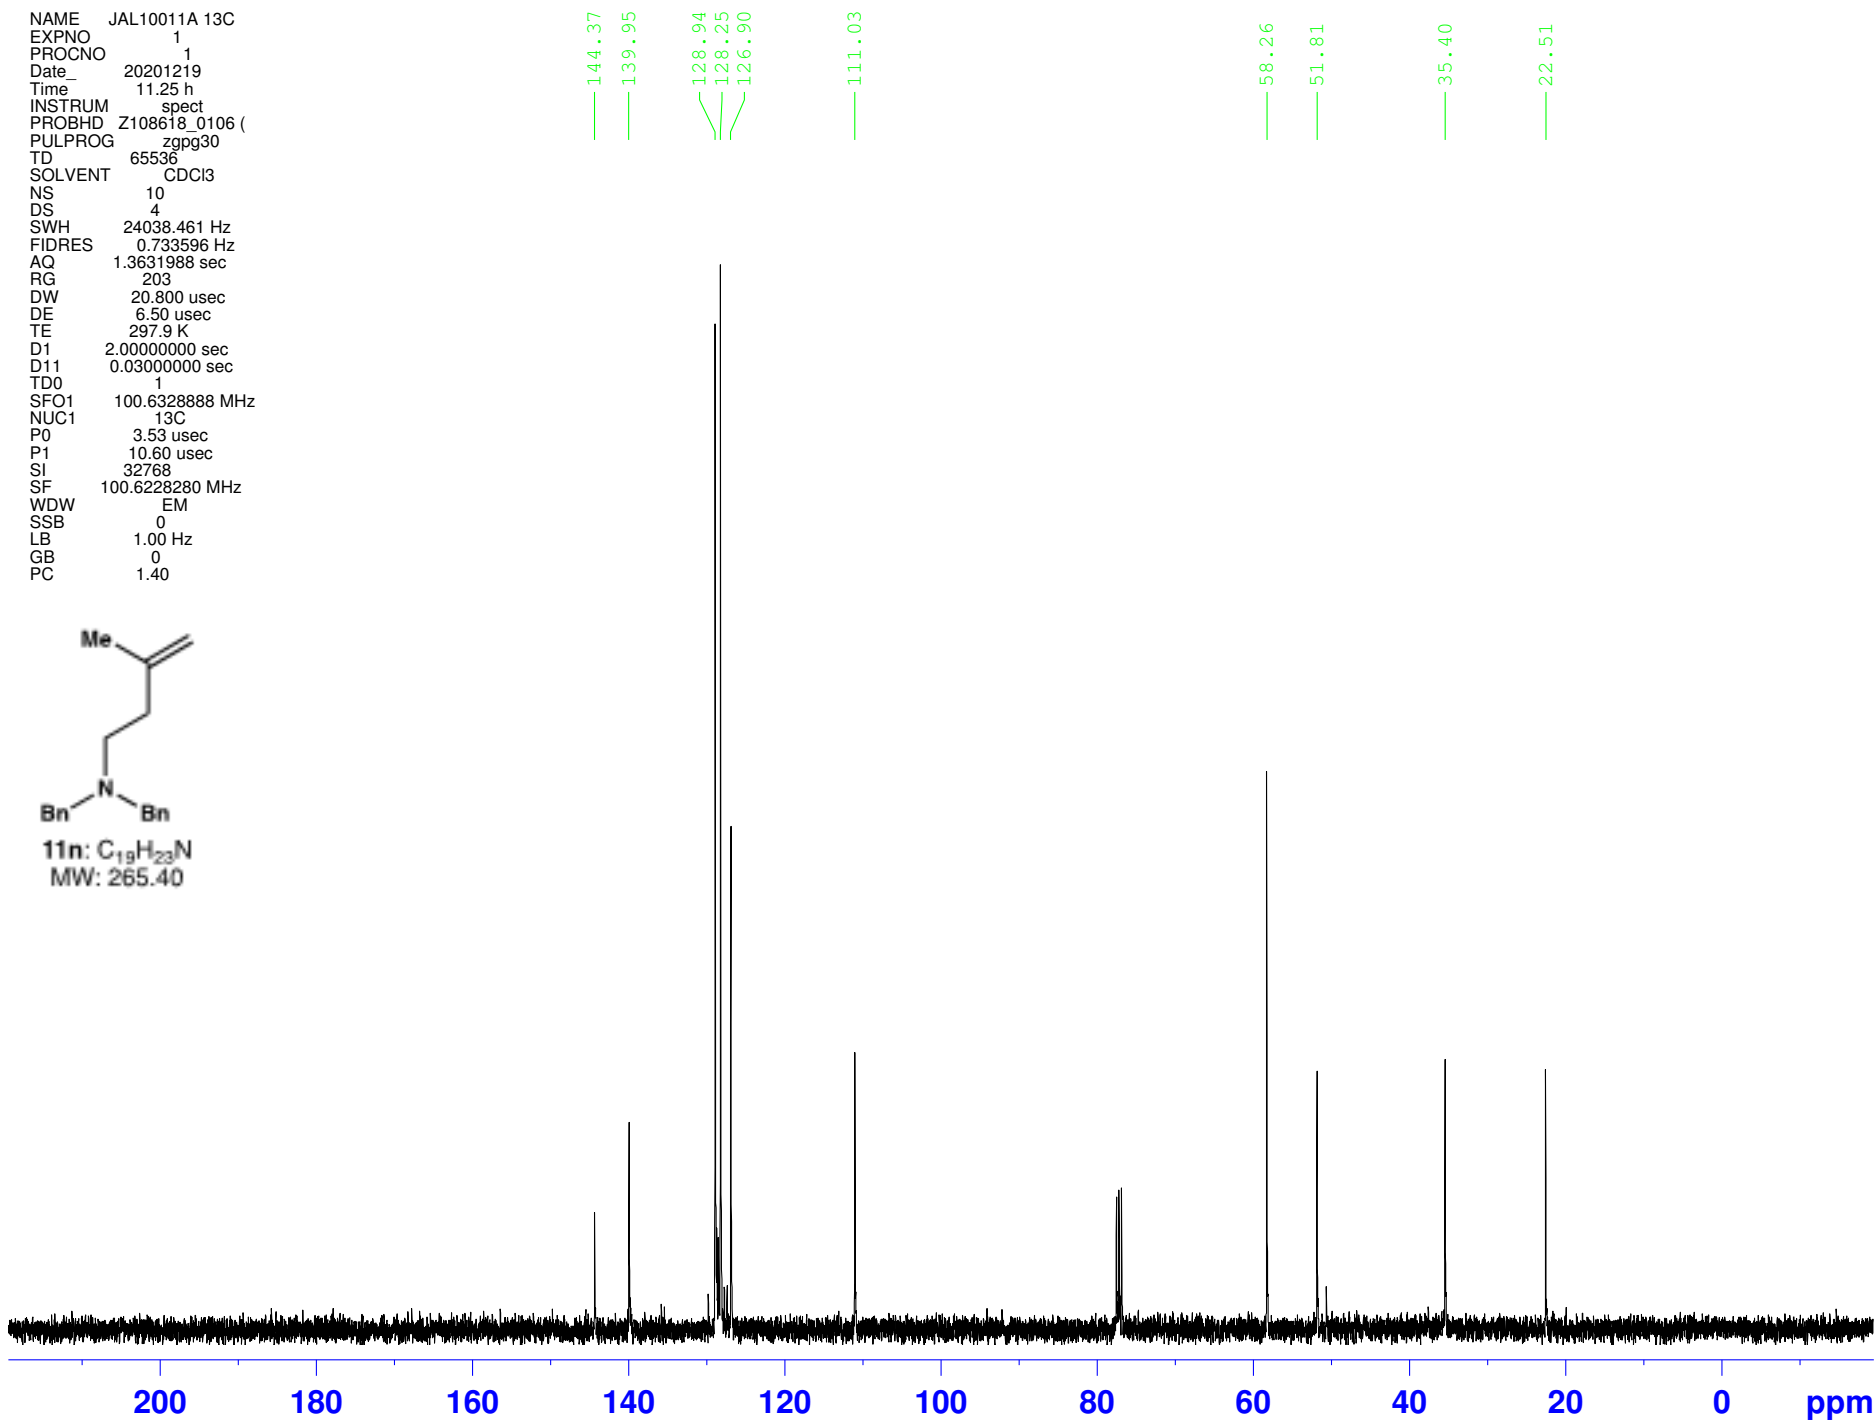

NAME JAL7295Ai 1H  
EXPNO 1  
PROCNO 1  
Date\_ 20191217  
Time 20.32 h  
INSTRUM spect  
PROBHD Z108618\_0106 (  
PULPROG zg30  
TD 65536  
SOLVENT CDCl3  
NS 16  
DS 2  
SWH 8012.820 Hz  
FIDRES 0.244532 Hz  
AQ 4.0894966 sec  
RG 32  
DW 62.400 usec  
DE 16.92 usec  
TE 295.3 K  
D1 1.00000000 sec  
TD0 1  
SFO1 400.1724710 MHz  
NUC1 1H  
P0 5.00 usec  
P1 15.00 usec  
SI 65536  
SF 400.1700000 MHz  
WDW EM  
SSB 0  
LB 0.30 Hz  
GB 0  
PC 1.00

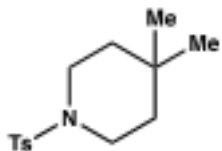

5: C<sub>14</sub>H<sub>21</sub>NO<sub>2</sub>S  
MW: 267.39

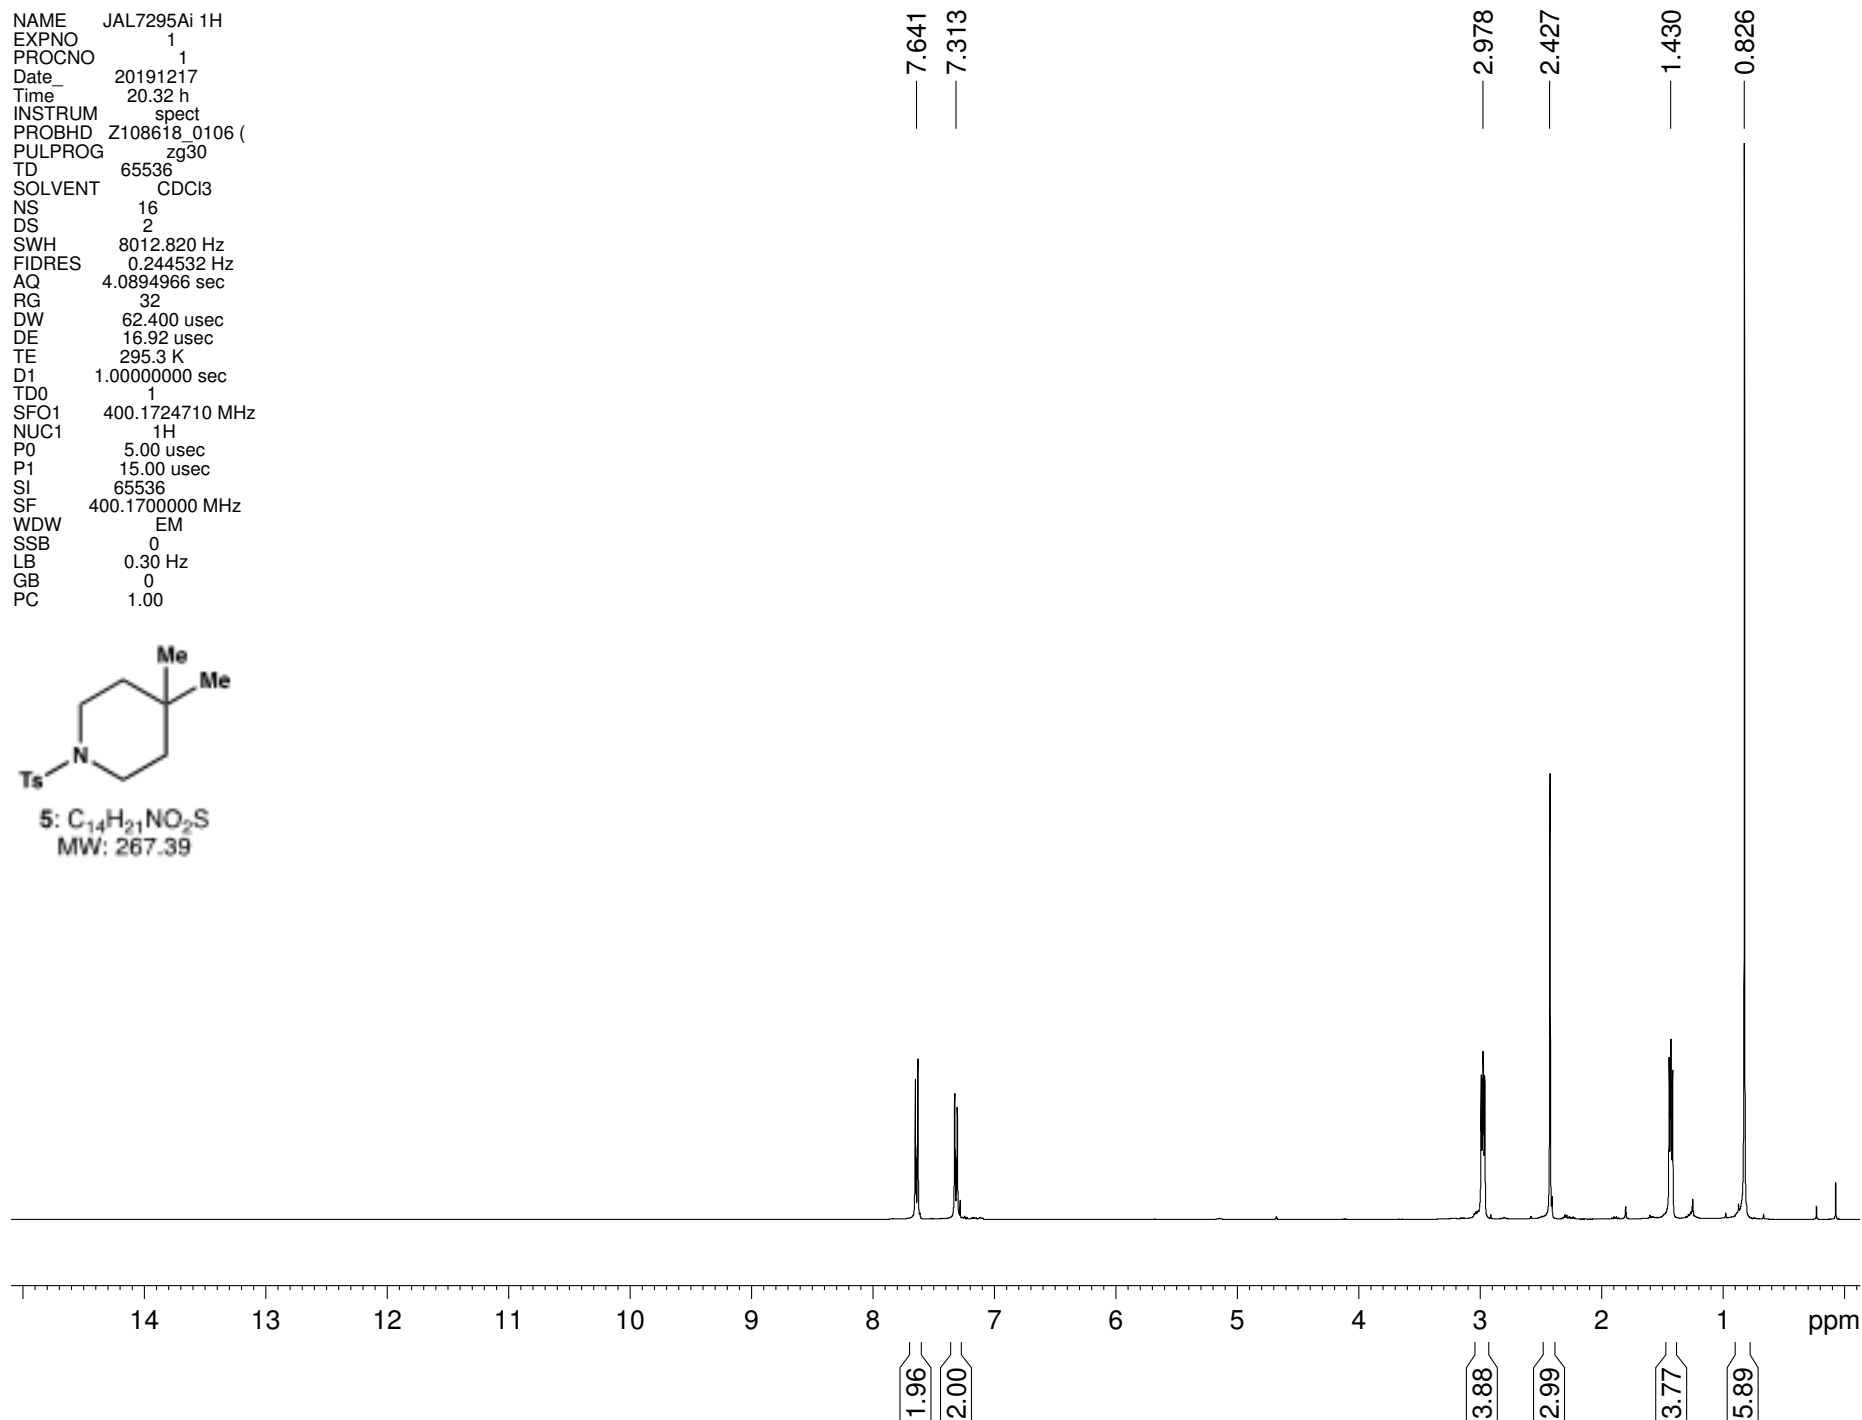



NAME JAL7299A 13C  
EXPNO 1  
PROCNO 1  
Date\_ 20191218  
Time 23.02 h  
INSTRUM spect  
PROBHD Z108618\_0106 (  
PULPROG zgpg30  
TD 65536  
SOLVENT CDCl3  
NS 6  
DS 4  
SWH 24038.461 Hz  
FIDRES 0.733596 Hz  
AQ 1.3631988 sec  
RG 203  
DW 20.800 usec  
DE 6.50 usec  
TE 294.6 K  
D1 2.00000000 sec  
D11 0.03000000 sec  
TD0 1  
SFO1 100.6328888 MHz  
NUC1 13C  
P0 3.53 usec  
P1 10.60 usec  
SI 32768  
SF 100.6228280 MHz  
WDW EM  
SSB 0  
LB 1.00 Hz  
GB 0  
PC 1.40

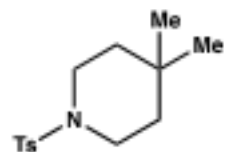

5: C<sub>14</sub>H<sub>21</sub>NO<sub>2</sub>S  
MW: 267.39

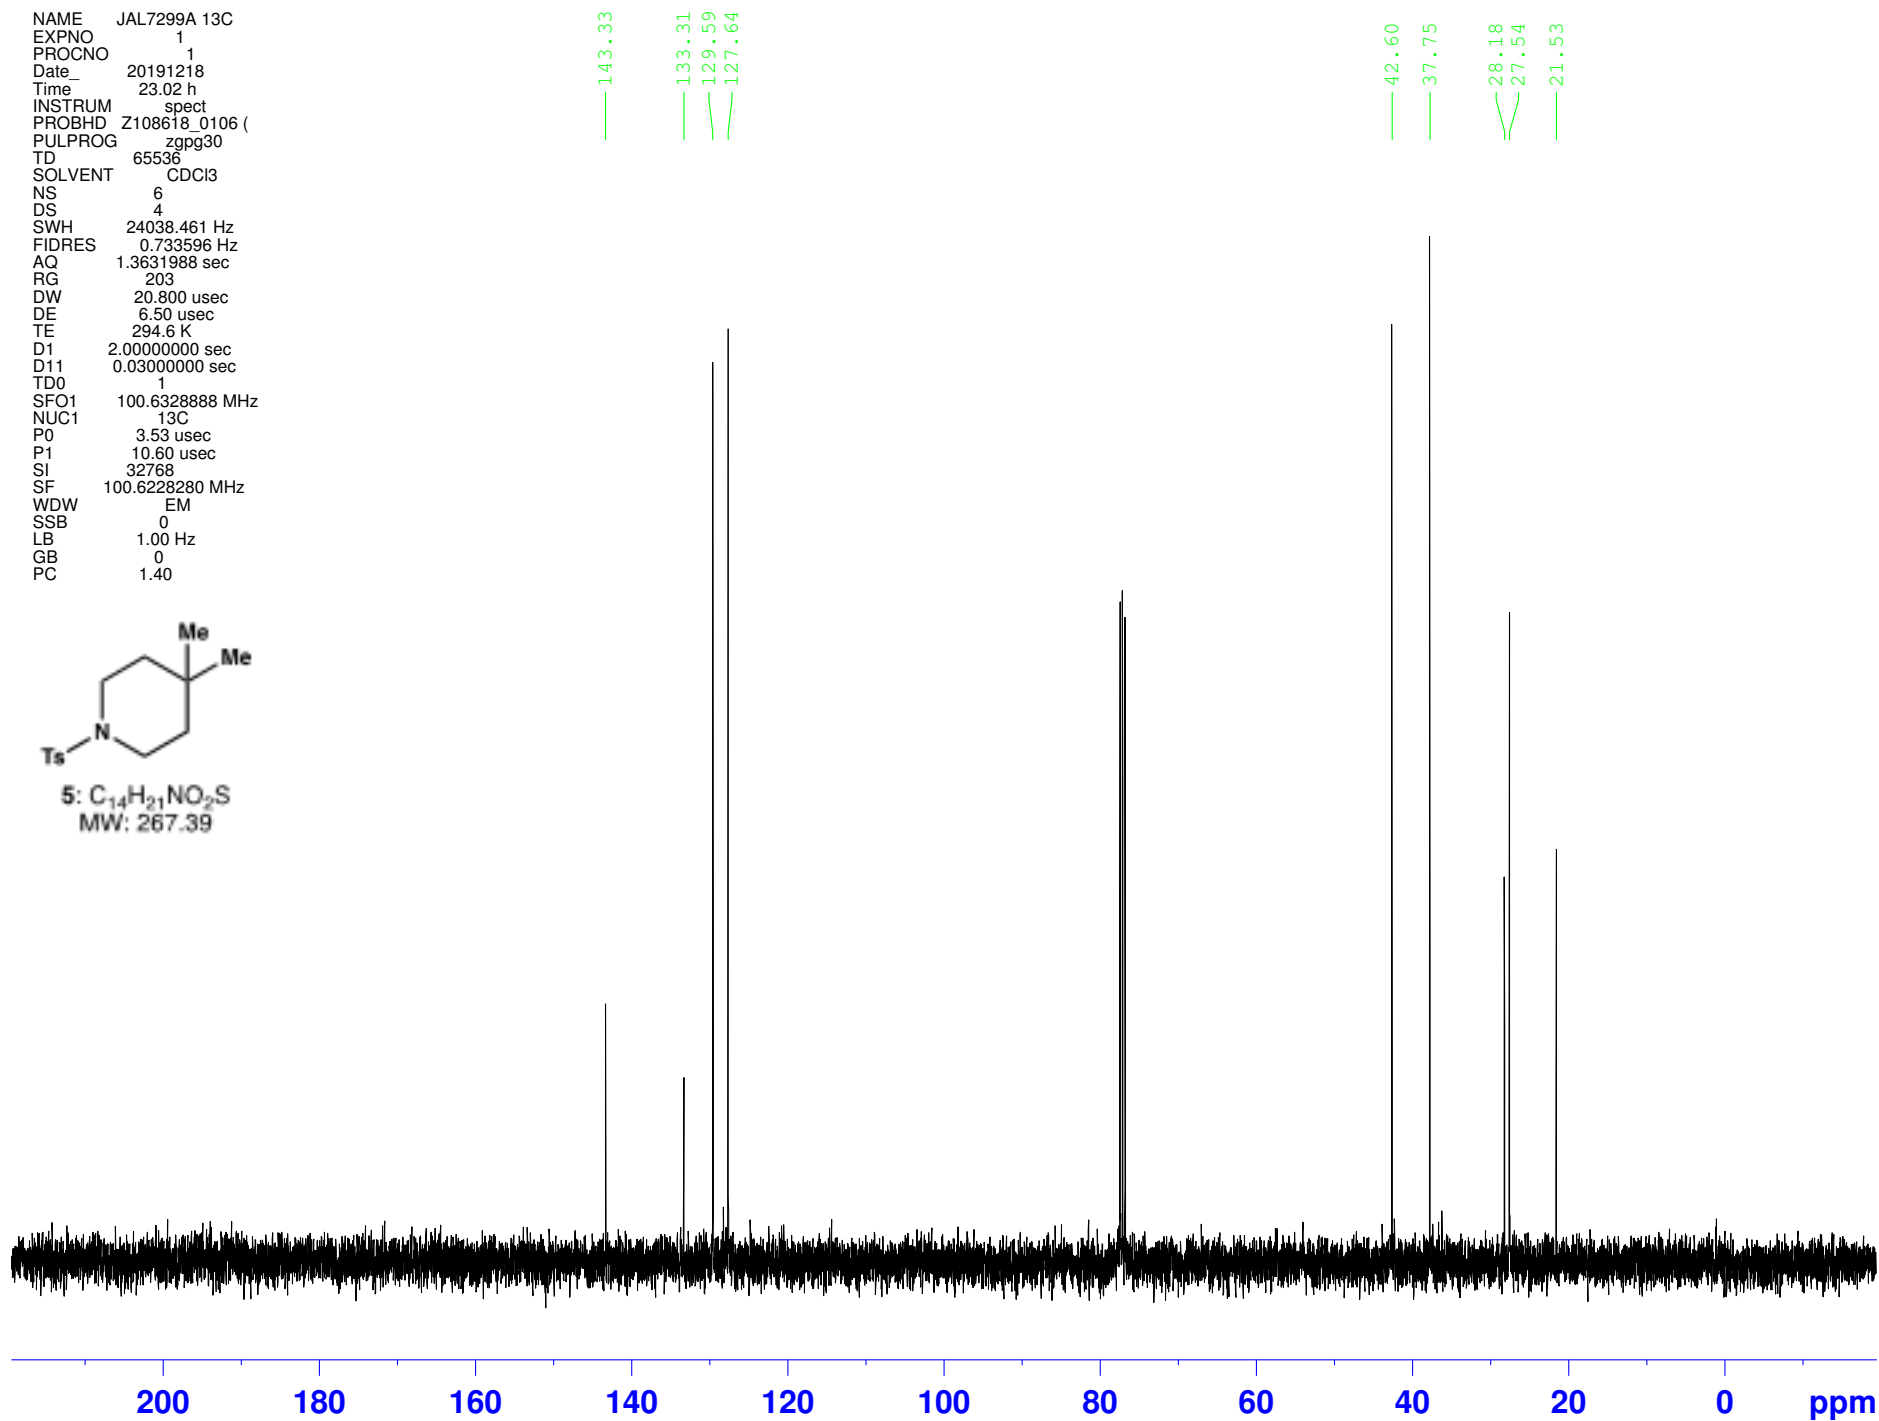

NAME JAL9405A' 1H  
 EXPNO 1  
 PROCNO 1  
 Date\_ 20201021  
 Time 9.58 h  
 INSTRUM spect  
 PROBHD Z108618\_0106 (  
 PULPROG zg30  
 TD 65536  
 SOLVENT CDCl3  
 NS 16  
 DS 2  
 SWH 8012.820 Hz  
 FIDRES 0.244532 Hz  
 AQ 4.0894966 sec  
 RG 144  
 DW 62.400 usec  
 DE 16.92 usec  
 TE 297.3 K  
 D1 1.00000000 sec  
 TD0 1  
 SFO1 400.1724710 MHz  
 NUC1 1H  
 P0 5.00 usec  
 P1 15.00 usec  
 SI 65536  
 SF 400.1700000 MHz  
 WDW EM  
 SSB 0  
 LB 0.30 Hz  
 GB 0  
 PC 1.00

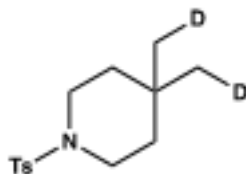

5-d<sub>2</sub>: C<sub>14</sub>H<sub>19</sub>D<sub>2</sub>NO<sub>2</sub>S  
 MW: 269.40

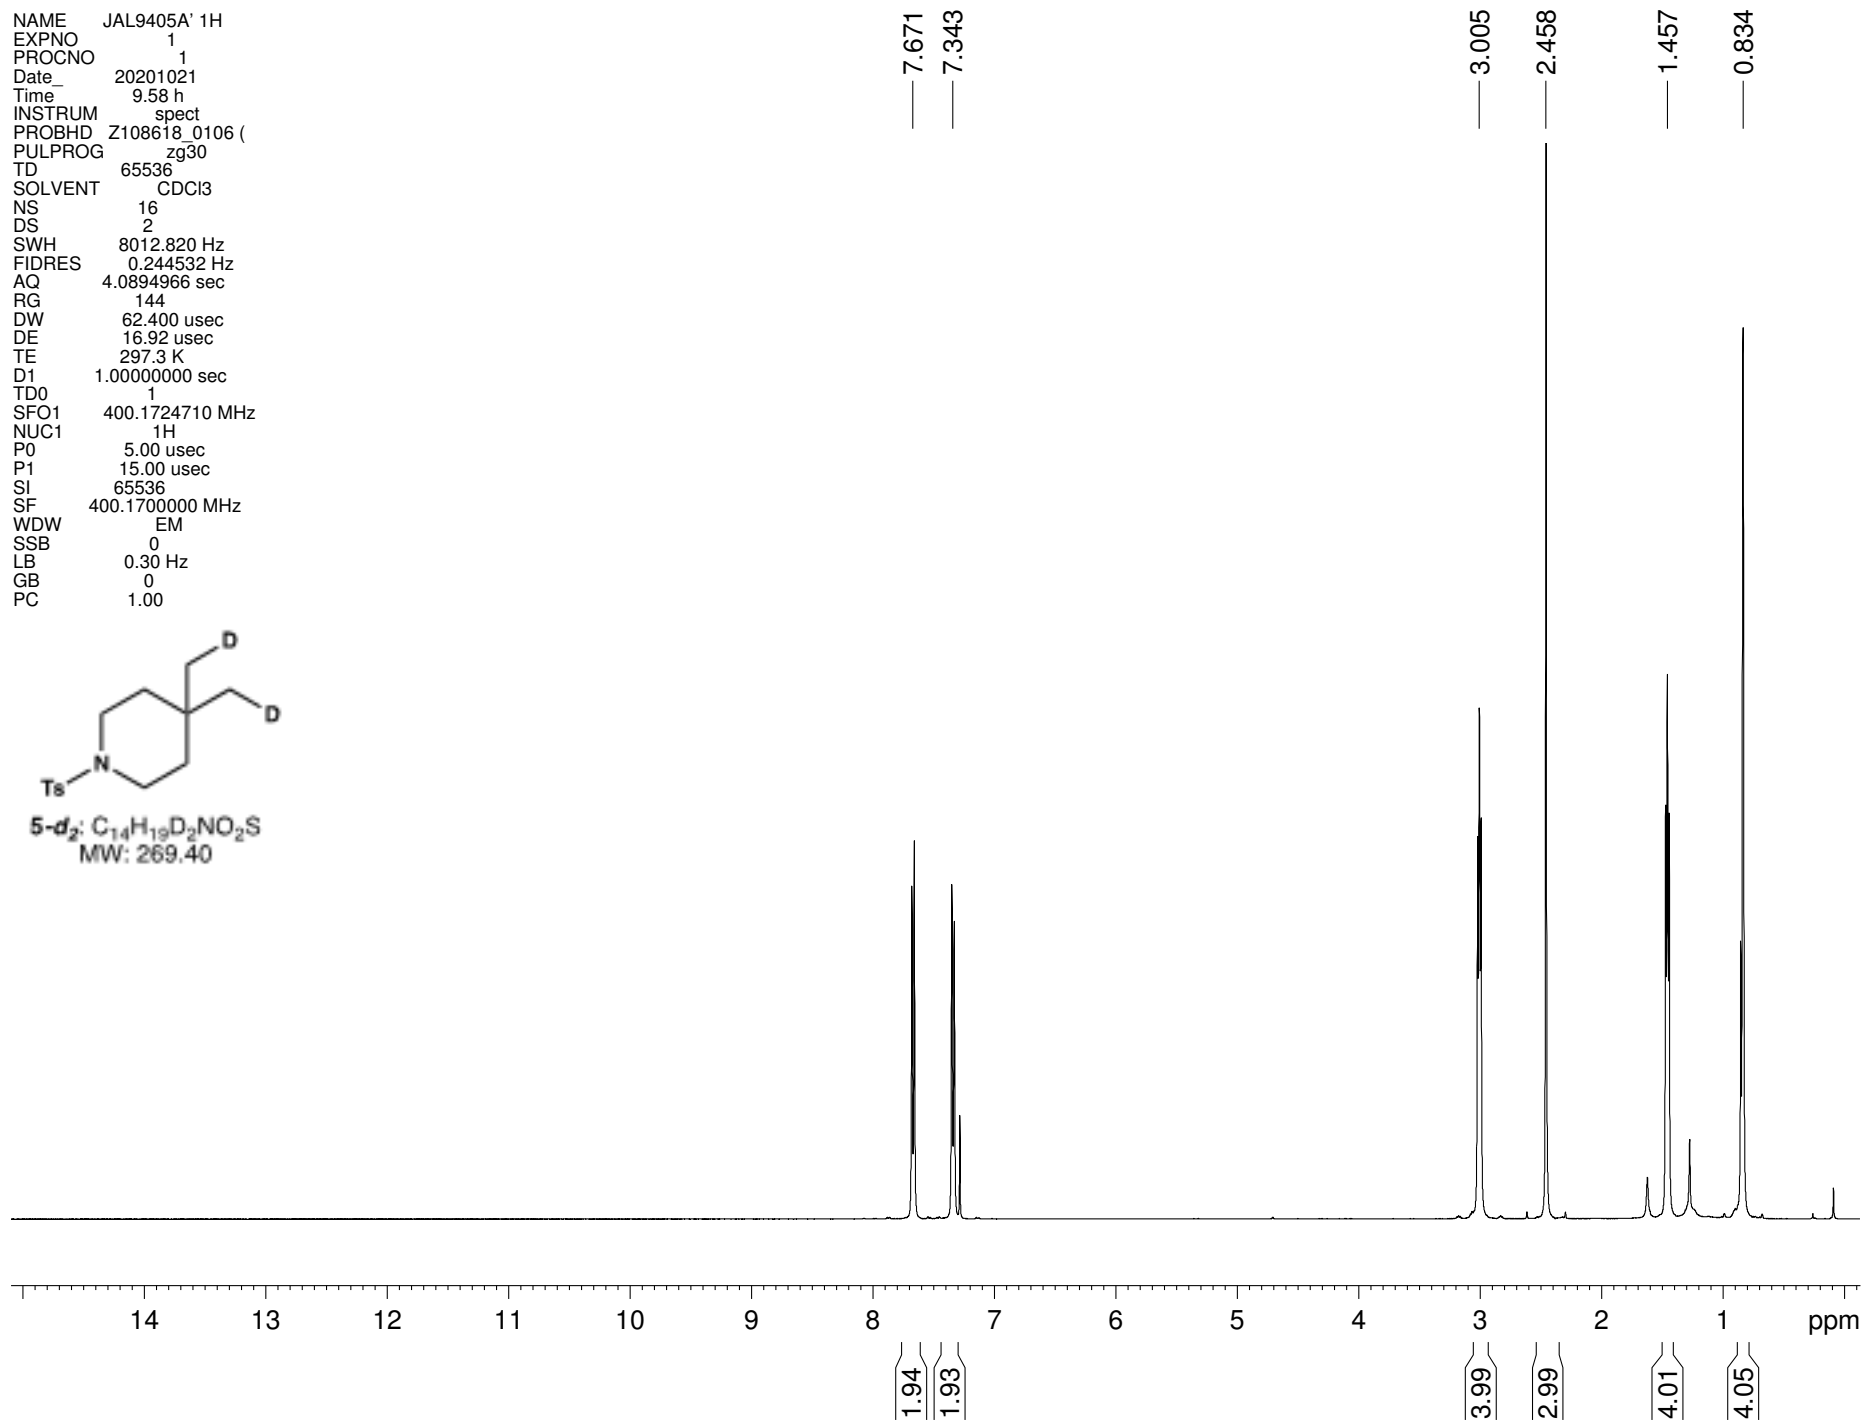

NAME NMB2158 1H  
 EXPNO 3  
 PROCNO 1  
 Date\_ 20210118  
 Time 22.53 h  
 INSTRUM spect  
 PROBHD Z108618\_0106 (  
 PULPROG zg30  
 TD 65536  
 SOLVENT CDCl3  
 NS 16  
 DS 2  
 SWH 8012.820 Hz  
 FIDRES 0.244532 Hz  
 AQ 4.0894966 sec  
 RG 203  
 DW 62.400 usec  
 DE 16.92 usec  
 TE 297.8 K  
 D1 1.00000000 sec  
 TD0 1  
 SFO1 400.1724710 MHz  
 NUC1 1H  
 P0 5.00 usec  
 P1 15.00 usec  
 SI 65536  
 SF 400.1700122 MHz  
 WDW no  
 SSB 0  
 LB 0.00 Hz  
 GB 0  
 PC 1.00

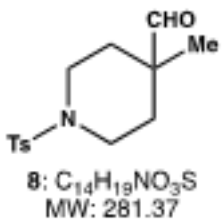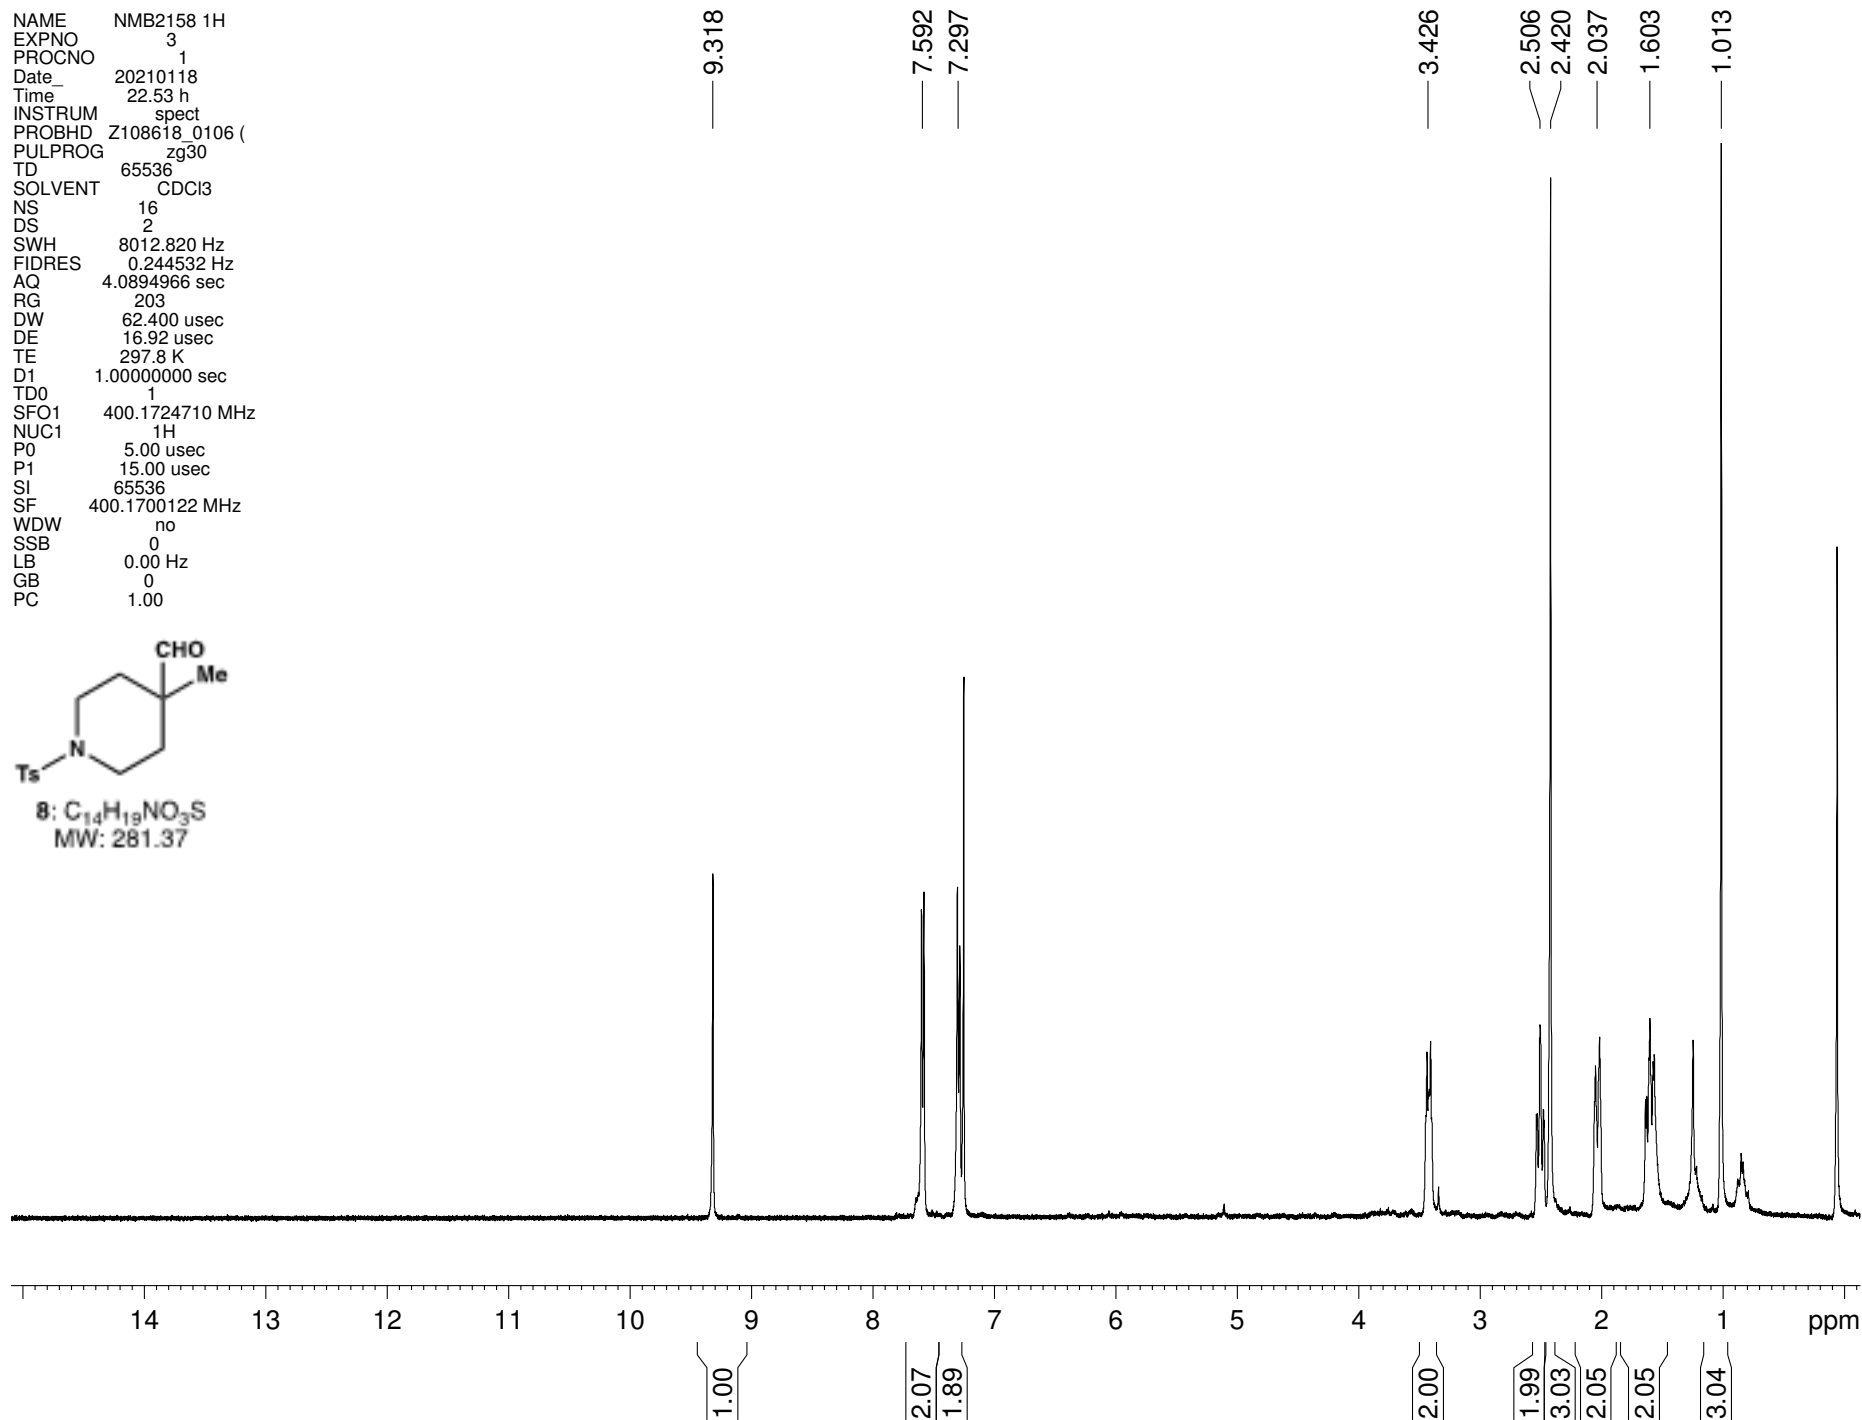

NAME DPC4039B 13C  
 EXPNO 1  
 PROCNO 1  
 Date\_ 20200125  
 Time 12.00 h  
 INSTRUM spect  
 PROBHD Z108618\_0106 (  
 PULPROG zgpg30  
 TD 65536  
 SOLVENT CDCl3  
 NS 151  
 DS 4  
 SWH 24038.461 Hz  
 FIDRES 0.733596 Hz  
 AQ 1.3631988 sec  
 RG 203  
 DW 20.800 usec  
 DE 6.50 usec  
 TE 295.1 K  
 D1 2.0000000 sec  
 D11 0.0300000 sec  
 TD0 1  
 SFO1 100.6328888 MHz  
 NUC1 13C  
 PO 3.53 usec  
 P1 10.60 usec  
 SI 32768  
 SF 100.6228280 MHz  
 WDW EM  
 SSB 0  
 LB 1.00 Hz  
 GB 0  
 PC 1.40

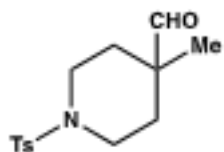

**8**: C<sub>14</sub>H<sub>19</sub>NO<sub>3</sub>S  
 MW: 281.37

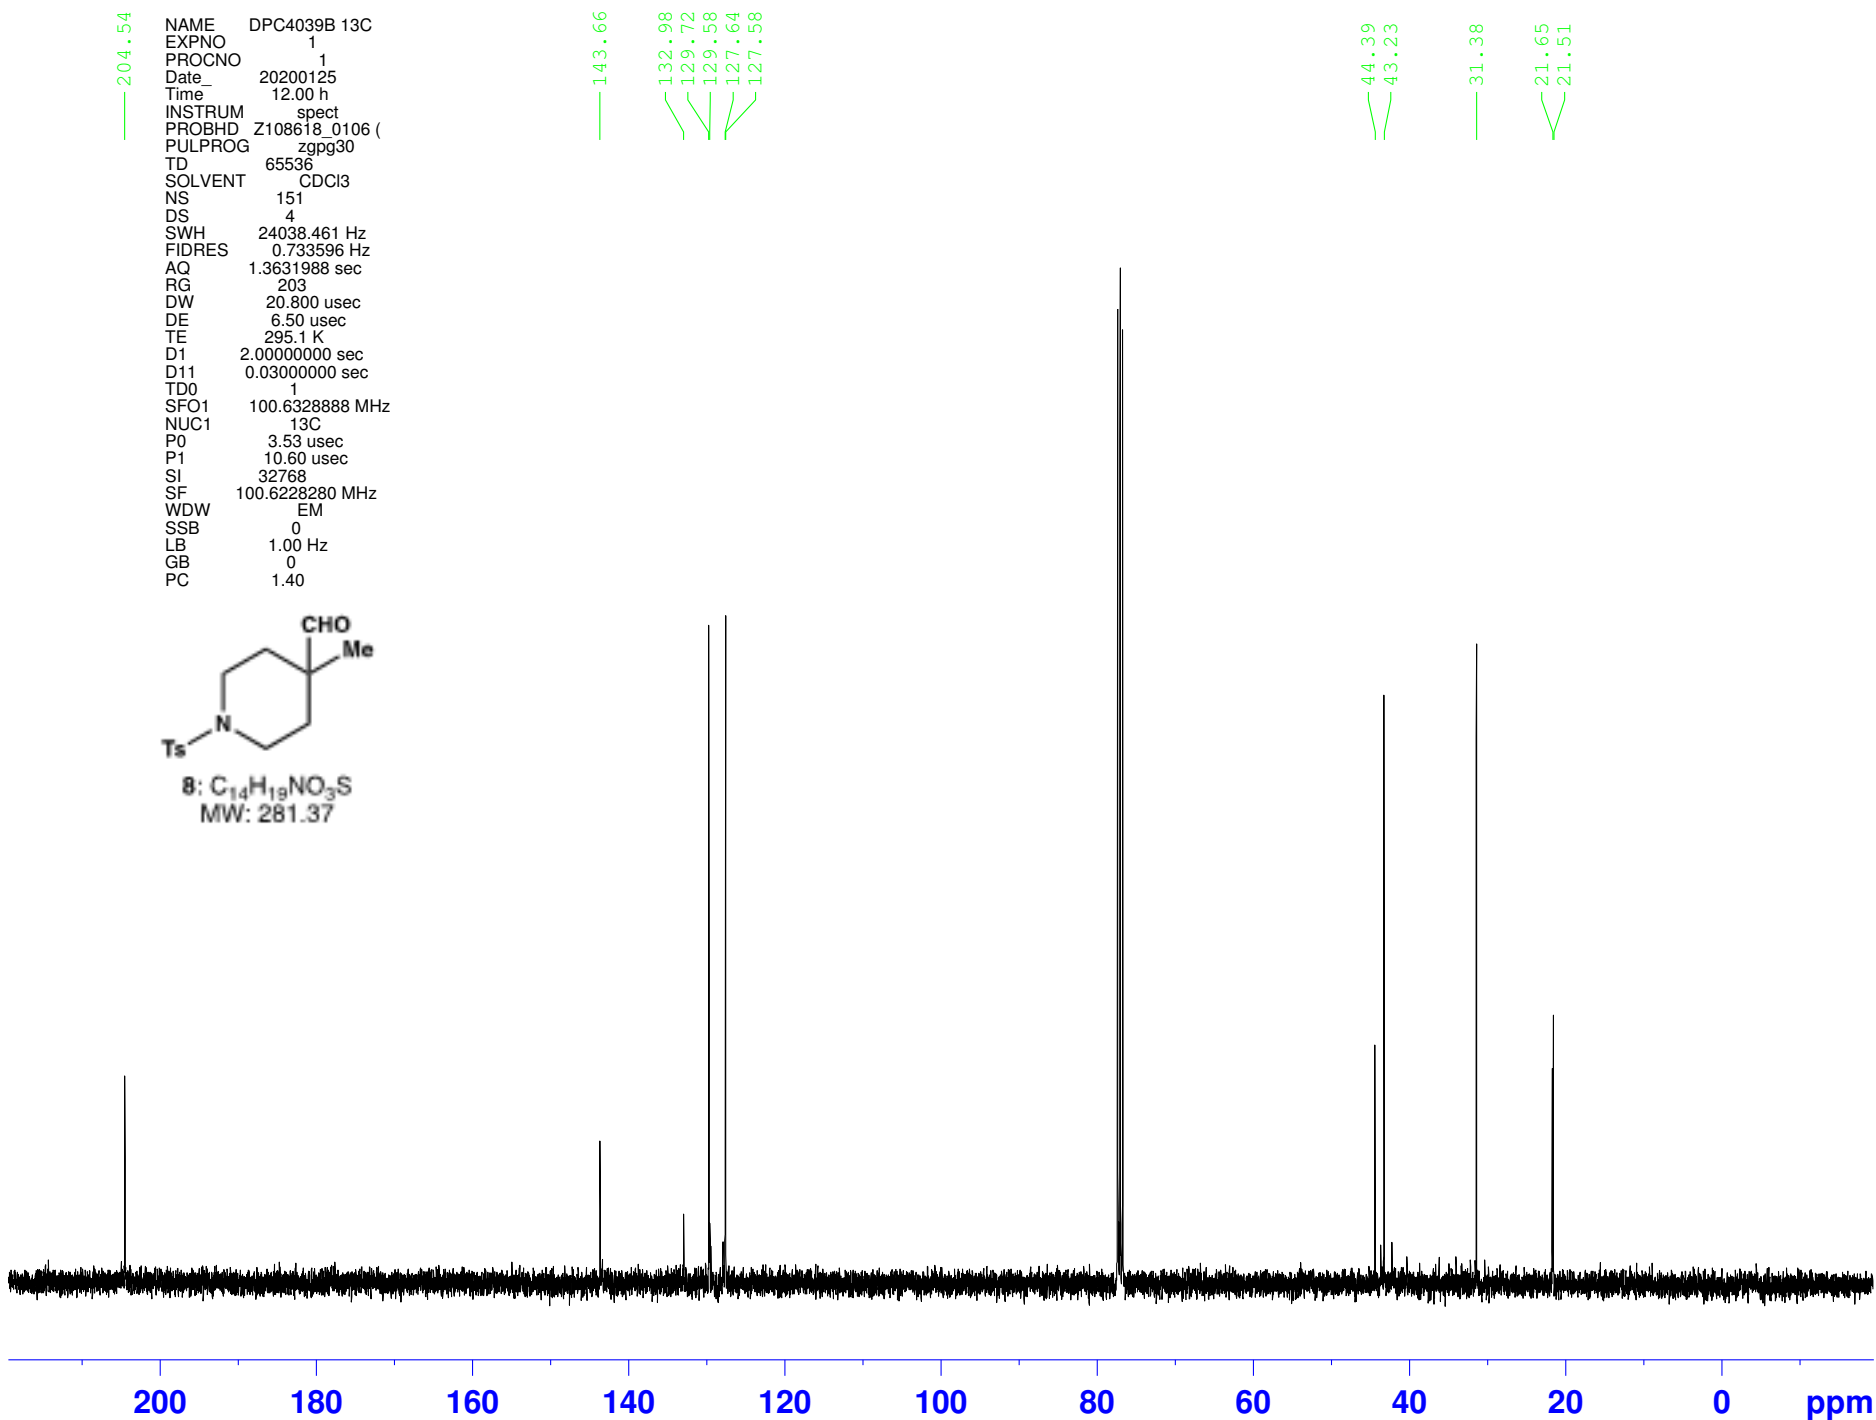

NAME NMB2166 A  
 EXPNO 1  
 PROCNO 1  
 Date\_ 20210201  
 Time 22.15 h  
 INSTRUM spect  
 PROBHD Z108618\_0106 (  
 PULPROG zg30  
 TD 65536  
 SOLVENT CDCl3  
 NS 16  
 DS 2  
 SWH 8012.820 Hz  
 FIDRES 0.244532 Hz  
 AQ 4.0894966 sec  
 RG 203  
 DW 62.400 usec  
 DE 16.92 usec  
 TE 297.8 K  
 D1 1.00000000 sec  
 TD0 1  
 SFO1 400.1724710 MHz  
 NUC1 1H  
 P0 5.00 usec  
 P1 15.00 usec  
 SI 65536  
 SF 400.1700000 MHz  
 WDW no  
 SSB 0  
 LB 0.00 Hz  
 GB 0  
 PC 1.00

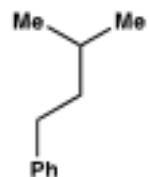

**10a: C<sub>11</sub>H<sub>16</sub>**  
 MW: 148.25

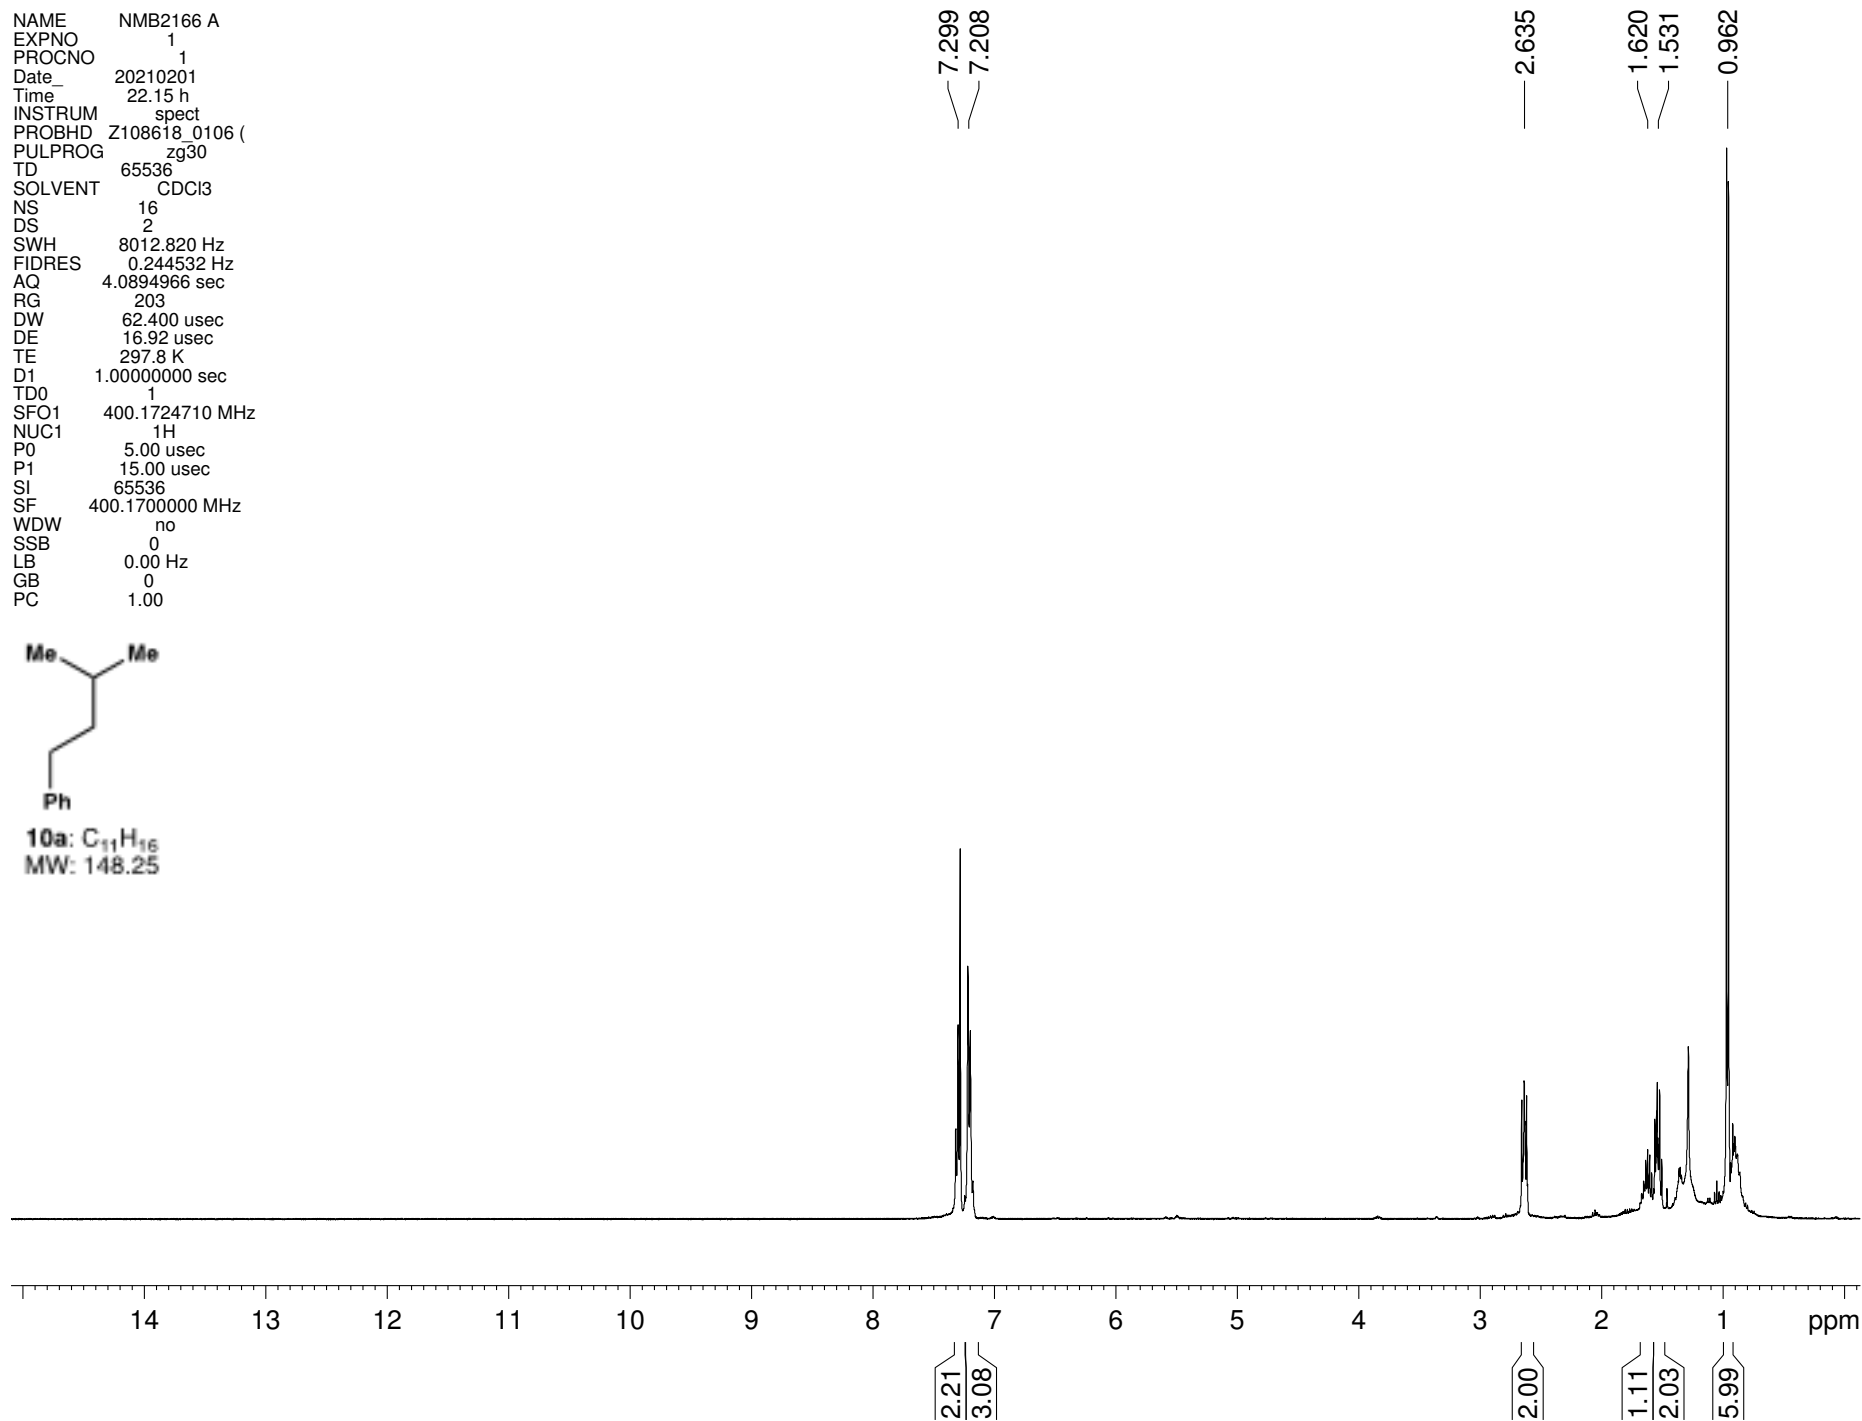

NAME JAL10175 crude 1H  
 EXPNO 2  
 PROCNO 1  
 Date\_ 20210223  
 Time 11.29 h  
 INSTRUM spect  
 PROBHD Z108618\_0106 (  
 PULPROG zg30  
 TD 65536  
 SOLVENT CDCl3  
 NS 16  
 DS 2  
 SWH 8012.820 Hz  
 FIDRES 0.244532 Hz  
 AQ 4.0894966 sec  
 RG 128  
 DW 62.400 usec  
 DE 16.92 usec  
 TE 297.5 K  
 D1 1.00000000 sec  
 TD0 1  
 SFO1 400.1724710 MHz  
 NUC1 1H  
 P0 5.00 usec  
 P1 15.00 usec  
 SI 65536  
 SF 400.1700102 MHz  
 WDW EM  
 SSB 0  
 LB 0.30 Hz  
 GB 0  
 PC 1.00

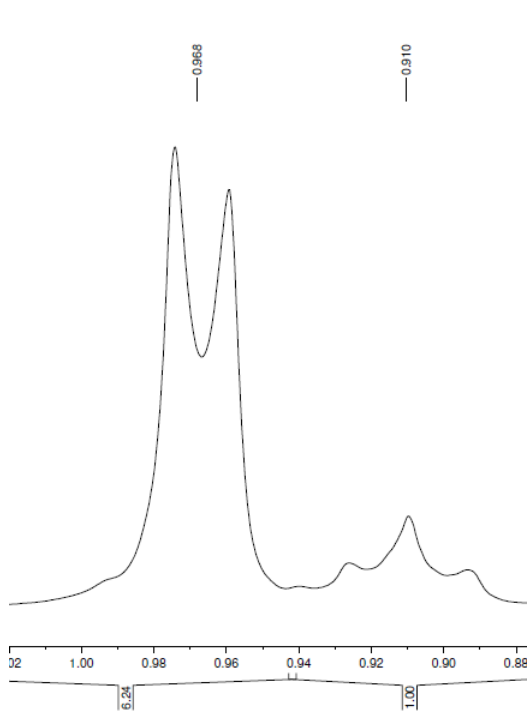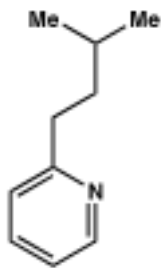

**10b**: C<sub>10</sub>H<sub>15</sub>N  
 MW: 149.24

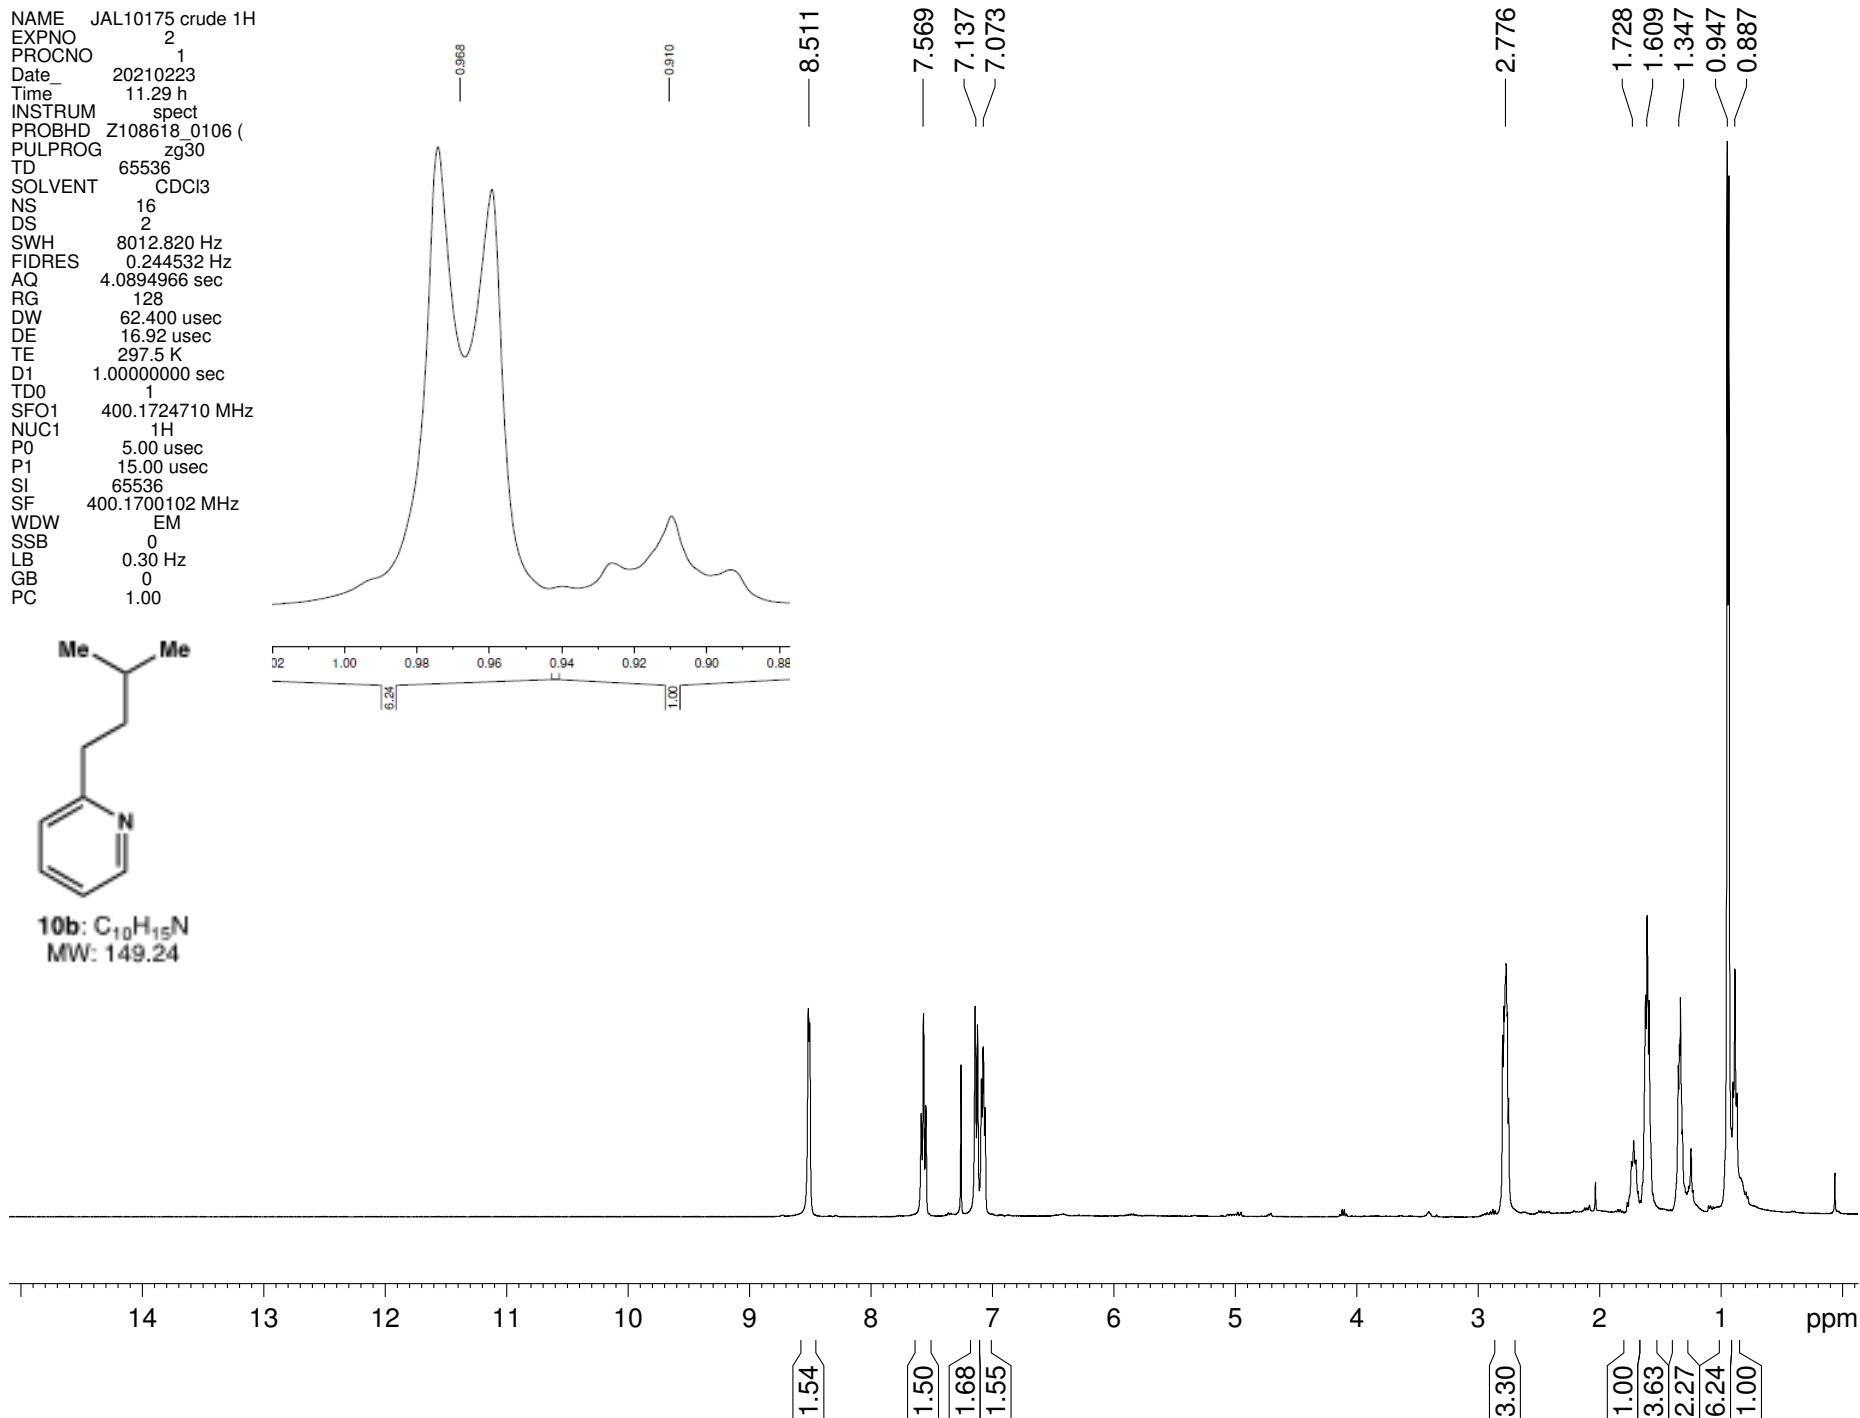

NAME JAL9452A 1H  
 EXPNO 1  
 PROCNO 1  
 Date\_ 20201106  
 Time 14.37 h  
 INSTRUM spect  
 PROBHD Z108618\_0106 (  
 PULPROG zg30  
 TD 65536  
 SOLVENT CDCl3  
 NS 16  
 DS 2  
 SWH 8012.820 Hz  
 FIDRES 0.244532 Hz  
 AQ 4.0894966 sec  
 RG 203  
 DW 62.400 usec  
 DE 16.92 usec  
 TE 297.5 K  
 D1 1.00000000 sec  
 TD0 1  
 SFO1 400.1724710 MHz  
 NUC1 1H  
 P0 5.00 usec  
 P1 15.00 usec  
 SI 65536  
 SF 400.1700000 MHz  
 WDW EM  
 SSB 0  
 LB 0.30 Hz  
 GB 0  
 PC 1.00

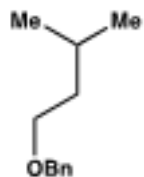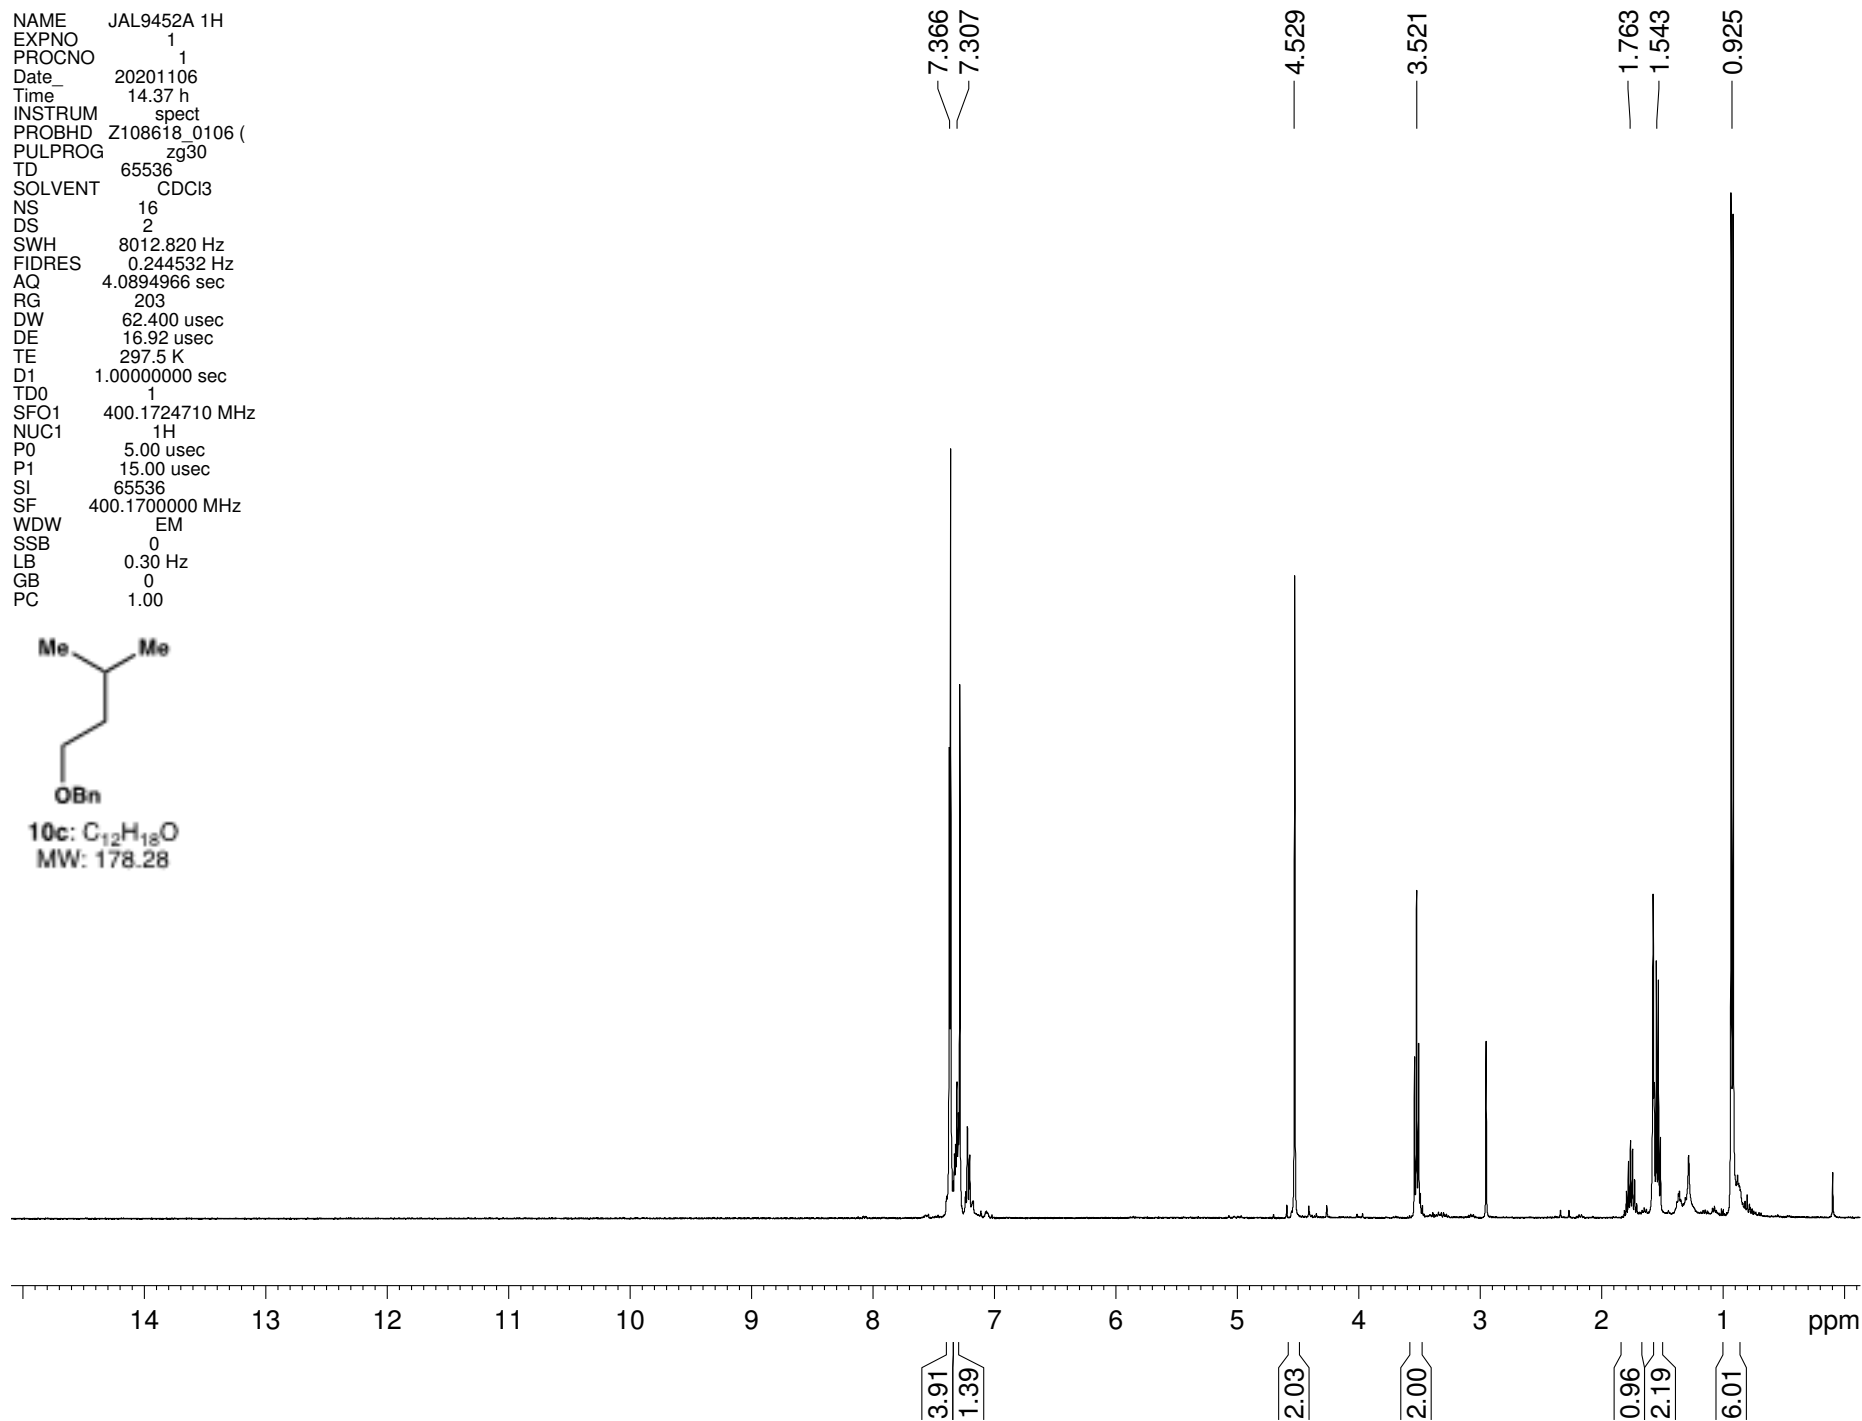

NAME JAL10170A 1H  
EXPNO 1  
PROCNO 1  
Date\_ 20210220  
Time 15.19 h  
INSTRUM spect  
PROBHD Z108618\_0106 (  
PULPROG zg30  
TD 65536  
SOLVENT CDCl3  
NS 16  
DS 2  
SWH 8012.820 Hz  
FIDRES 0.244532 Hz  
AQ 4.0894966 sec  
RG 203  
DW 62.400 usec  
DE 16.92 usec  
TE 297.6 K  
D1 1.00000000 sec  
TD0 1  
SFO1 400.1724710 MHz  
NUC1 1H  
P0 5.00 usec  
P1 15.00 usec  
SI 65536  
SF 400.1700000 MHz  
WDW EM  
SSB 0  
LB 0.30 Hz  
GB 0  
PC 1.00

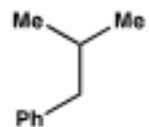

10d: C<sub>10</sub>H<sub>14</sub>  
MW: 134.22

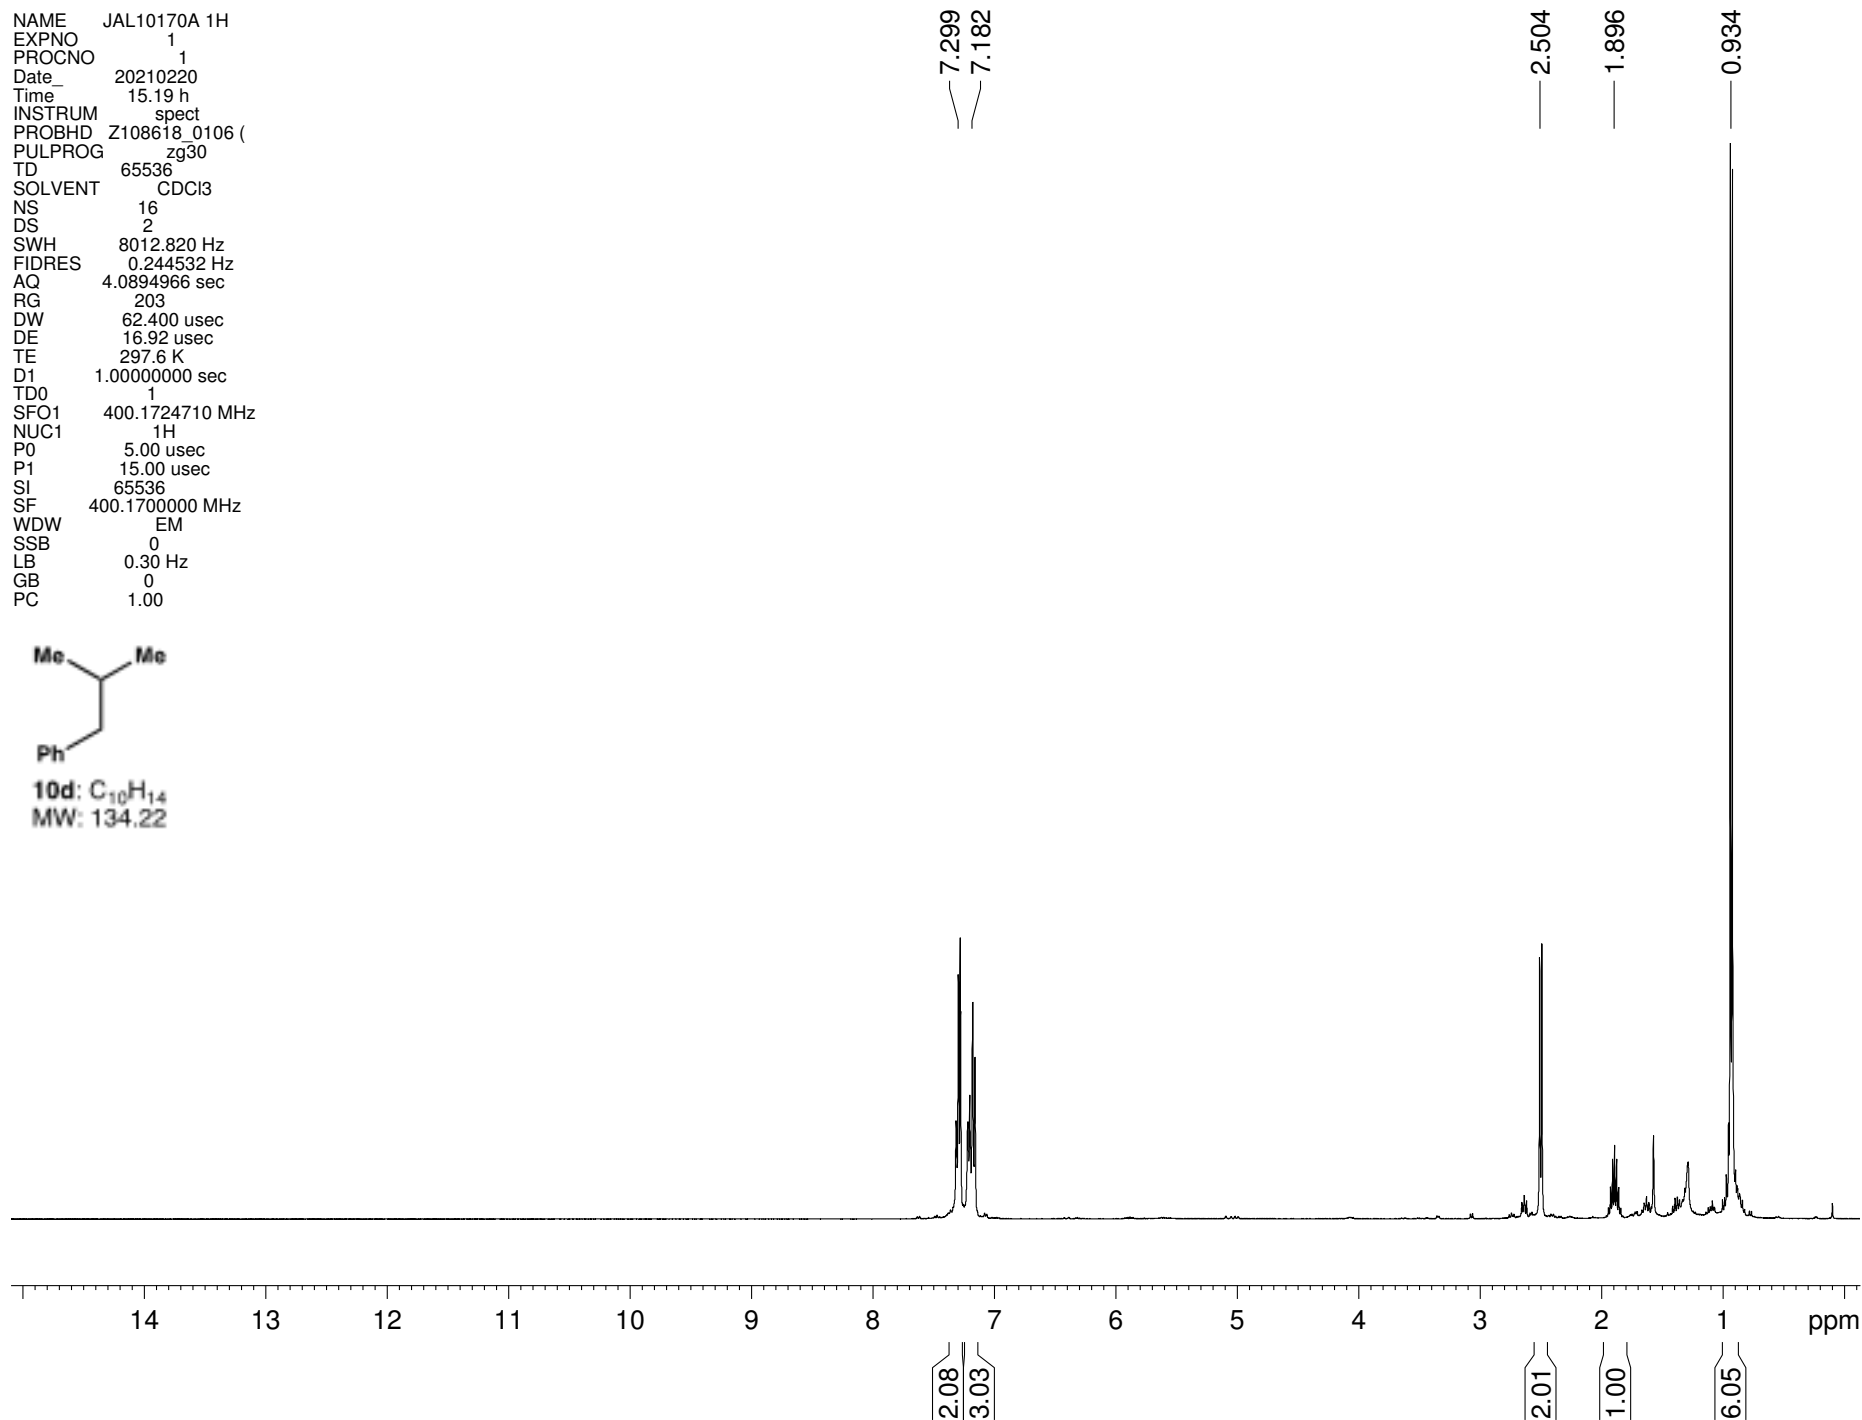



NAME JAL10136A-A 1H  
 EXPNO 1  
 PROCNO 1  
 Date\_ 20210202  
 Time 17.25 h  
 INSTRUM spect  
 PROBHD Z108618\_0106 (  
 PULPROG zg30  
 TD 65536  
 SOLVENT CDCl3  
 NS 8  
 DS 2  
 SWH 8012.820 Hz  
 FIDRES 0.244532 Hz  
 AQ 4.0894966 sec  
 RG 203  
 DW 62.400 usec  
 DE 16.92 usec  
 TE 297.7 K  
 D1 1.00000000 sec  
 TD0 1  
 SFO1 400.1724710 MHz  
 NUC1 1H  
 P0 5.00 usec  
 P1 15.00 usec  
 SI 65536  
 SF 400.1700000 MHz  
 WDW EM  
 SSB 0  
 LB 0.30 Hz  
 GB 0  
 PC 1.00

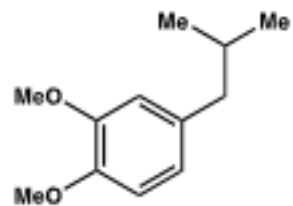

**10e**: C<sub>12</sub>H<sub>18</sub>O<sub>2</sub>  
 MW: 194.27

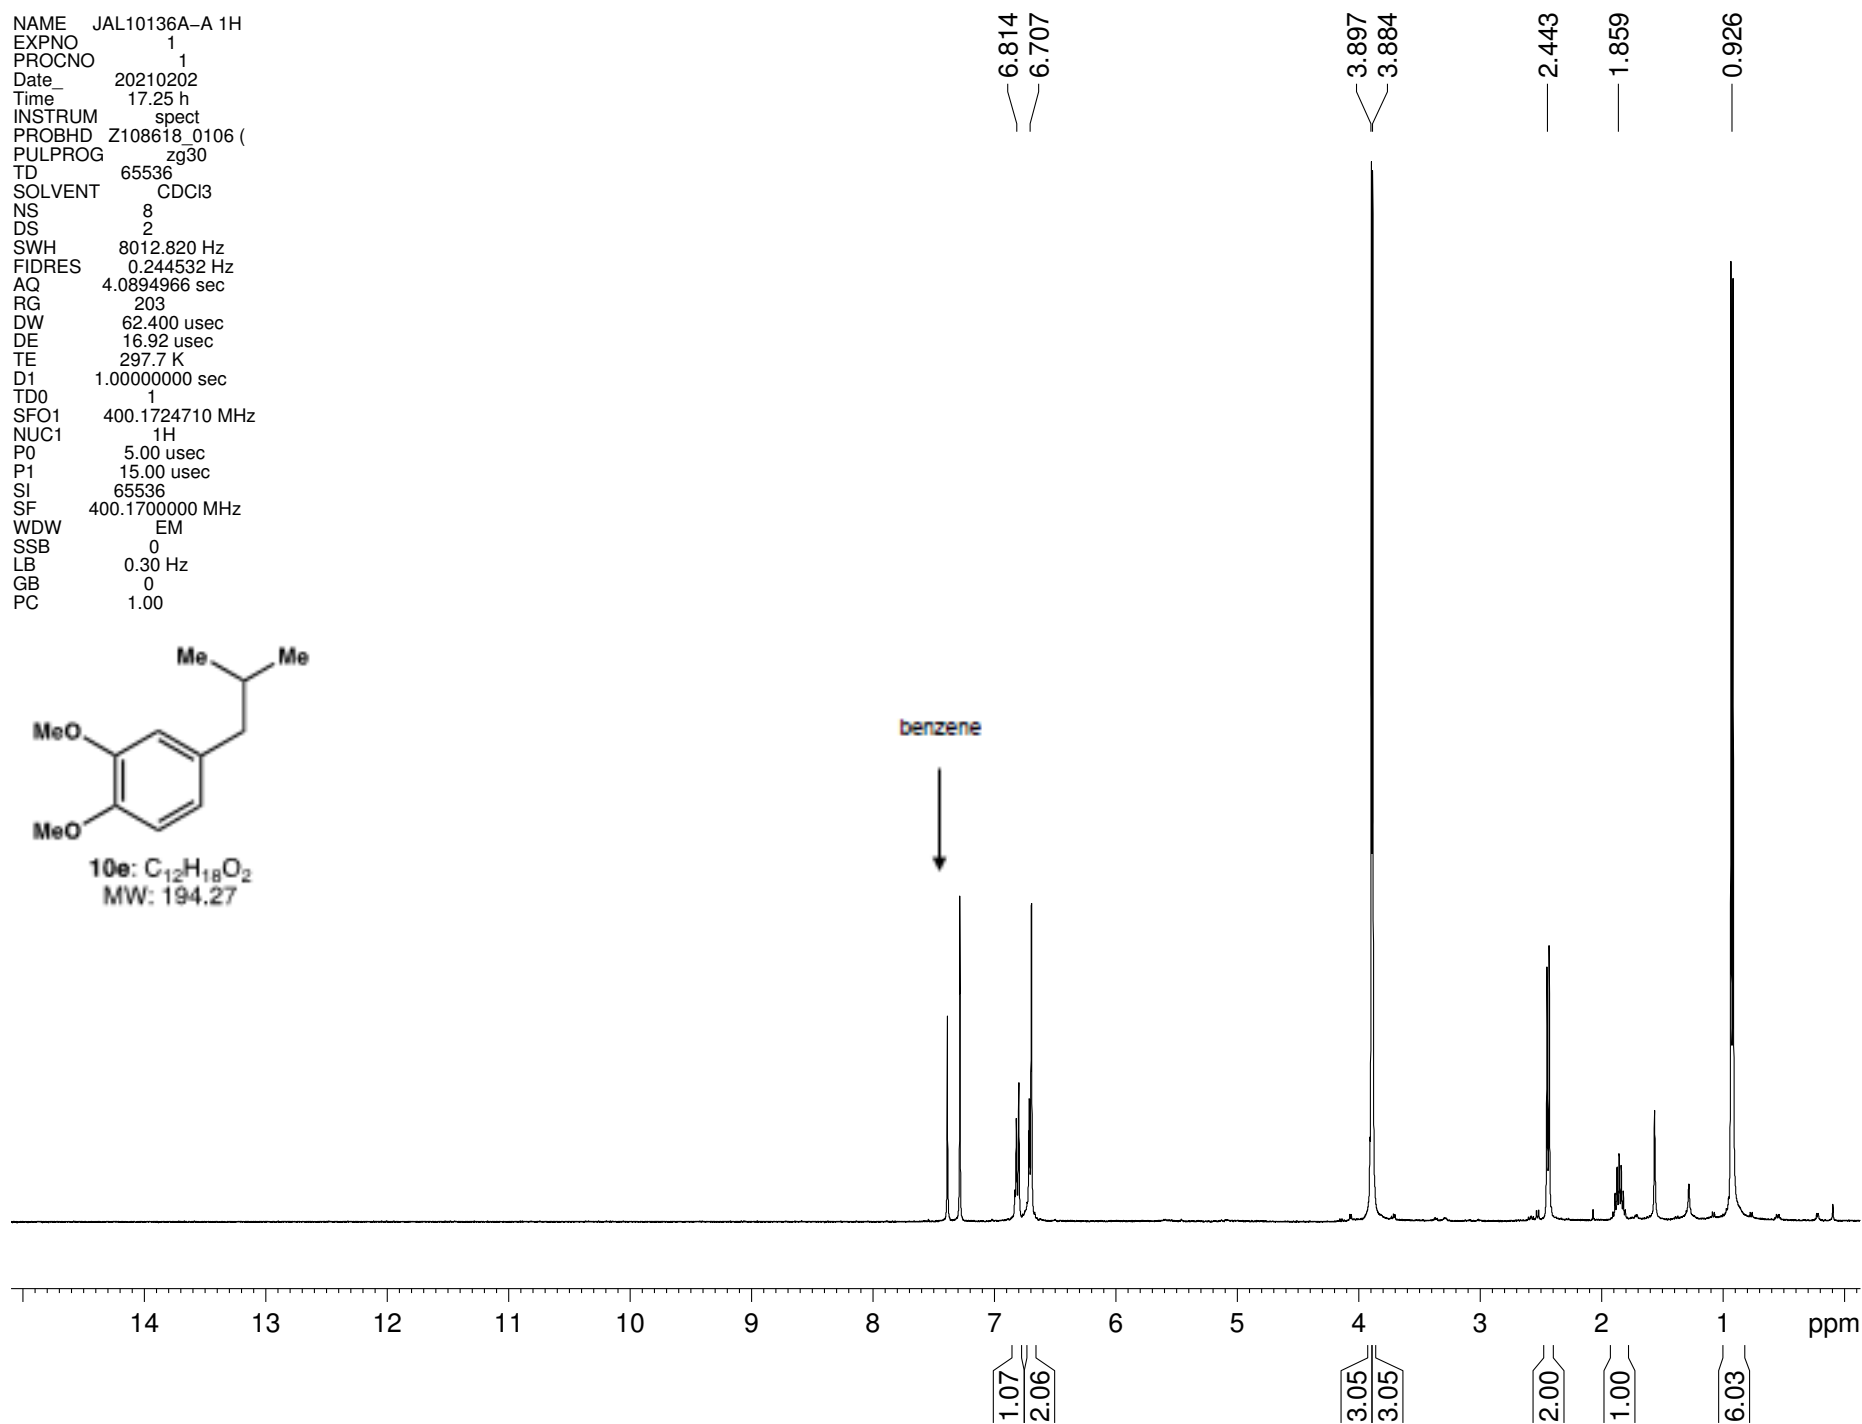

NAME NMB1281  
EXPNO 3  
PROCNO 1  
Date\_ 20200712  
Time 22.49 h  
INSTRUM spect  
PROBHD Z108618\_0106 (  
PULPROG zg30  
TD 65536  
SOLVENT CDCl3  
NS 16  
DS 2  
SWH 8012.820 Hz  
FIDRES 0.244532 Hz  
AQ 4.0894966 sec  
RG 203  
DW 62.400 usec  
DE 16.92 usec  
TE 297.7 K  
D1 1.00000000 sec  
TD0 1  
SFO1 400.1724710 MHz  
NUC1 1H  
P0 5.00 usec  
P1 15.00 usec  
SI 65536  
SF 400.1700000 MHz  
WDW no  
SSB 0  
LB 0.00 Hz  
GB 0  
PC 1.00

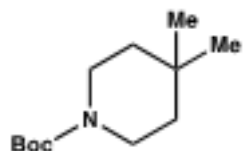

12a: C<sub>12</sub>H<sub>23</sub>NO<sub>2</sub>  
MW: 213.32

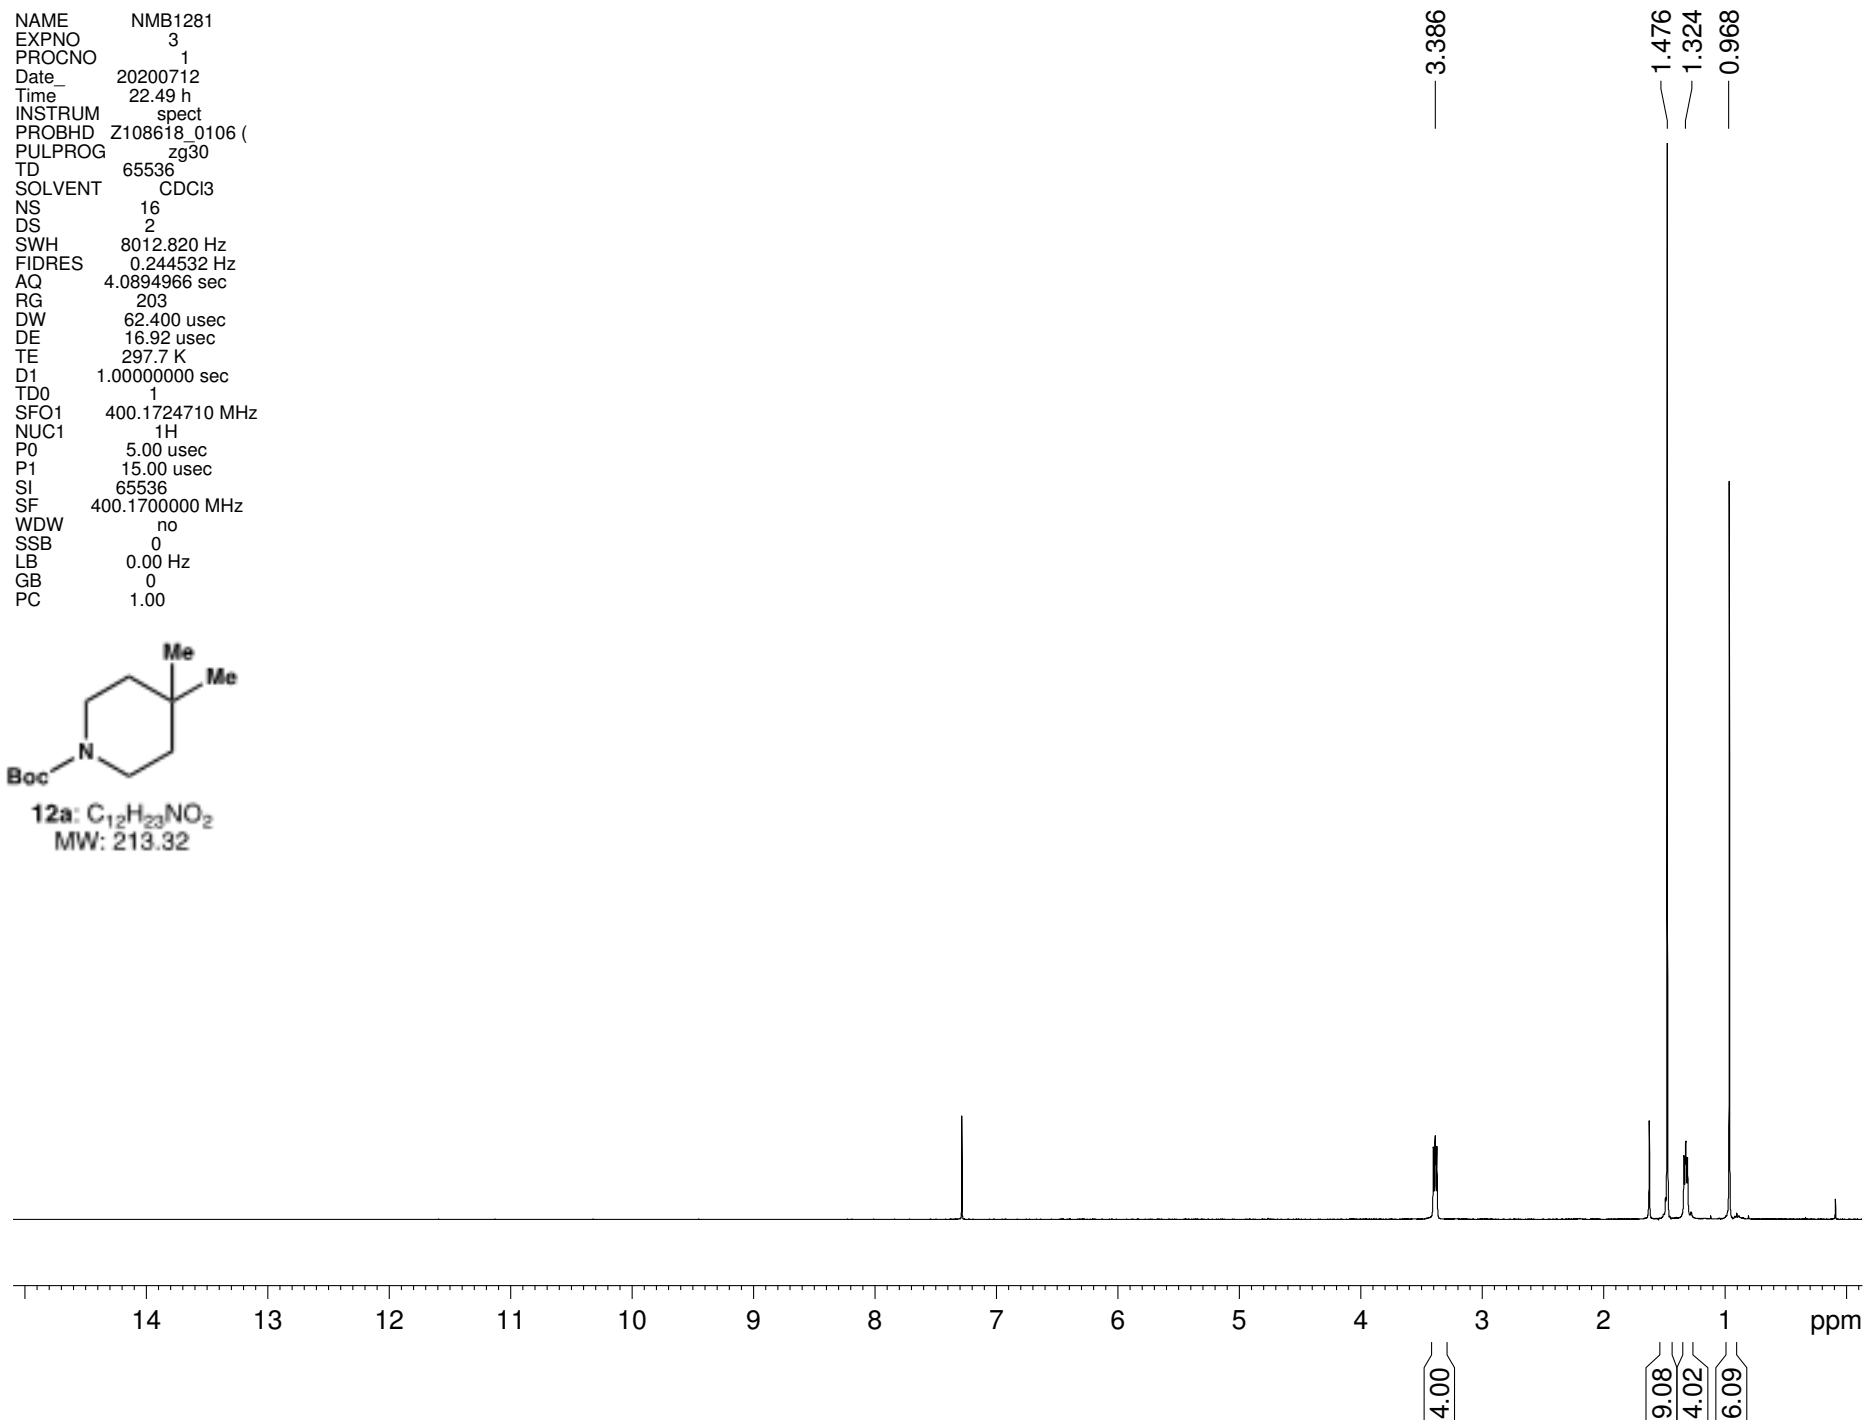

NAME NMB1281  
EXPNO 8  
PROCNO 1  
Date\_ 20200713  
Time 9.51 h  
INSTRUM spect  
PROBHD Z108618\_0106 (  
PULPROG zgpg30  
TD 65536  
SOLVENT CDCl3  
NS 200  
DS 4  
SWH 24038.461 Hz  
FIDRES 0.733596 Hz  
AQ 1.3631988 sec  
RG 203  
DW 20.800 usec  
DE 6.50 usec  
TE 298.3 K  
D1 2.00000000 sec  
D11 0.03000000 sec  
TD0 1  
SFO1 100.6328888 MHz  
NUC1 13C  
P0 3.53 usec  
P1 10.60 usec  
SI 32768  
SF 100.6228280 MHz  
WDW EM  
SSB 0  
LB 1.00 Hz  
GB 0  
PC 1.40

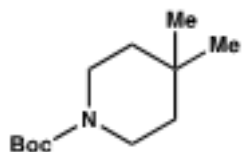

12a: C<sub>12</sub>H<sub>23</sub>NO<sub>2</sub>  
MW: 213.32

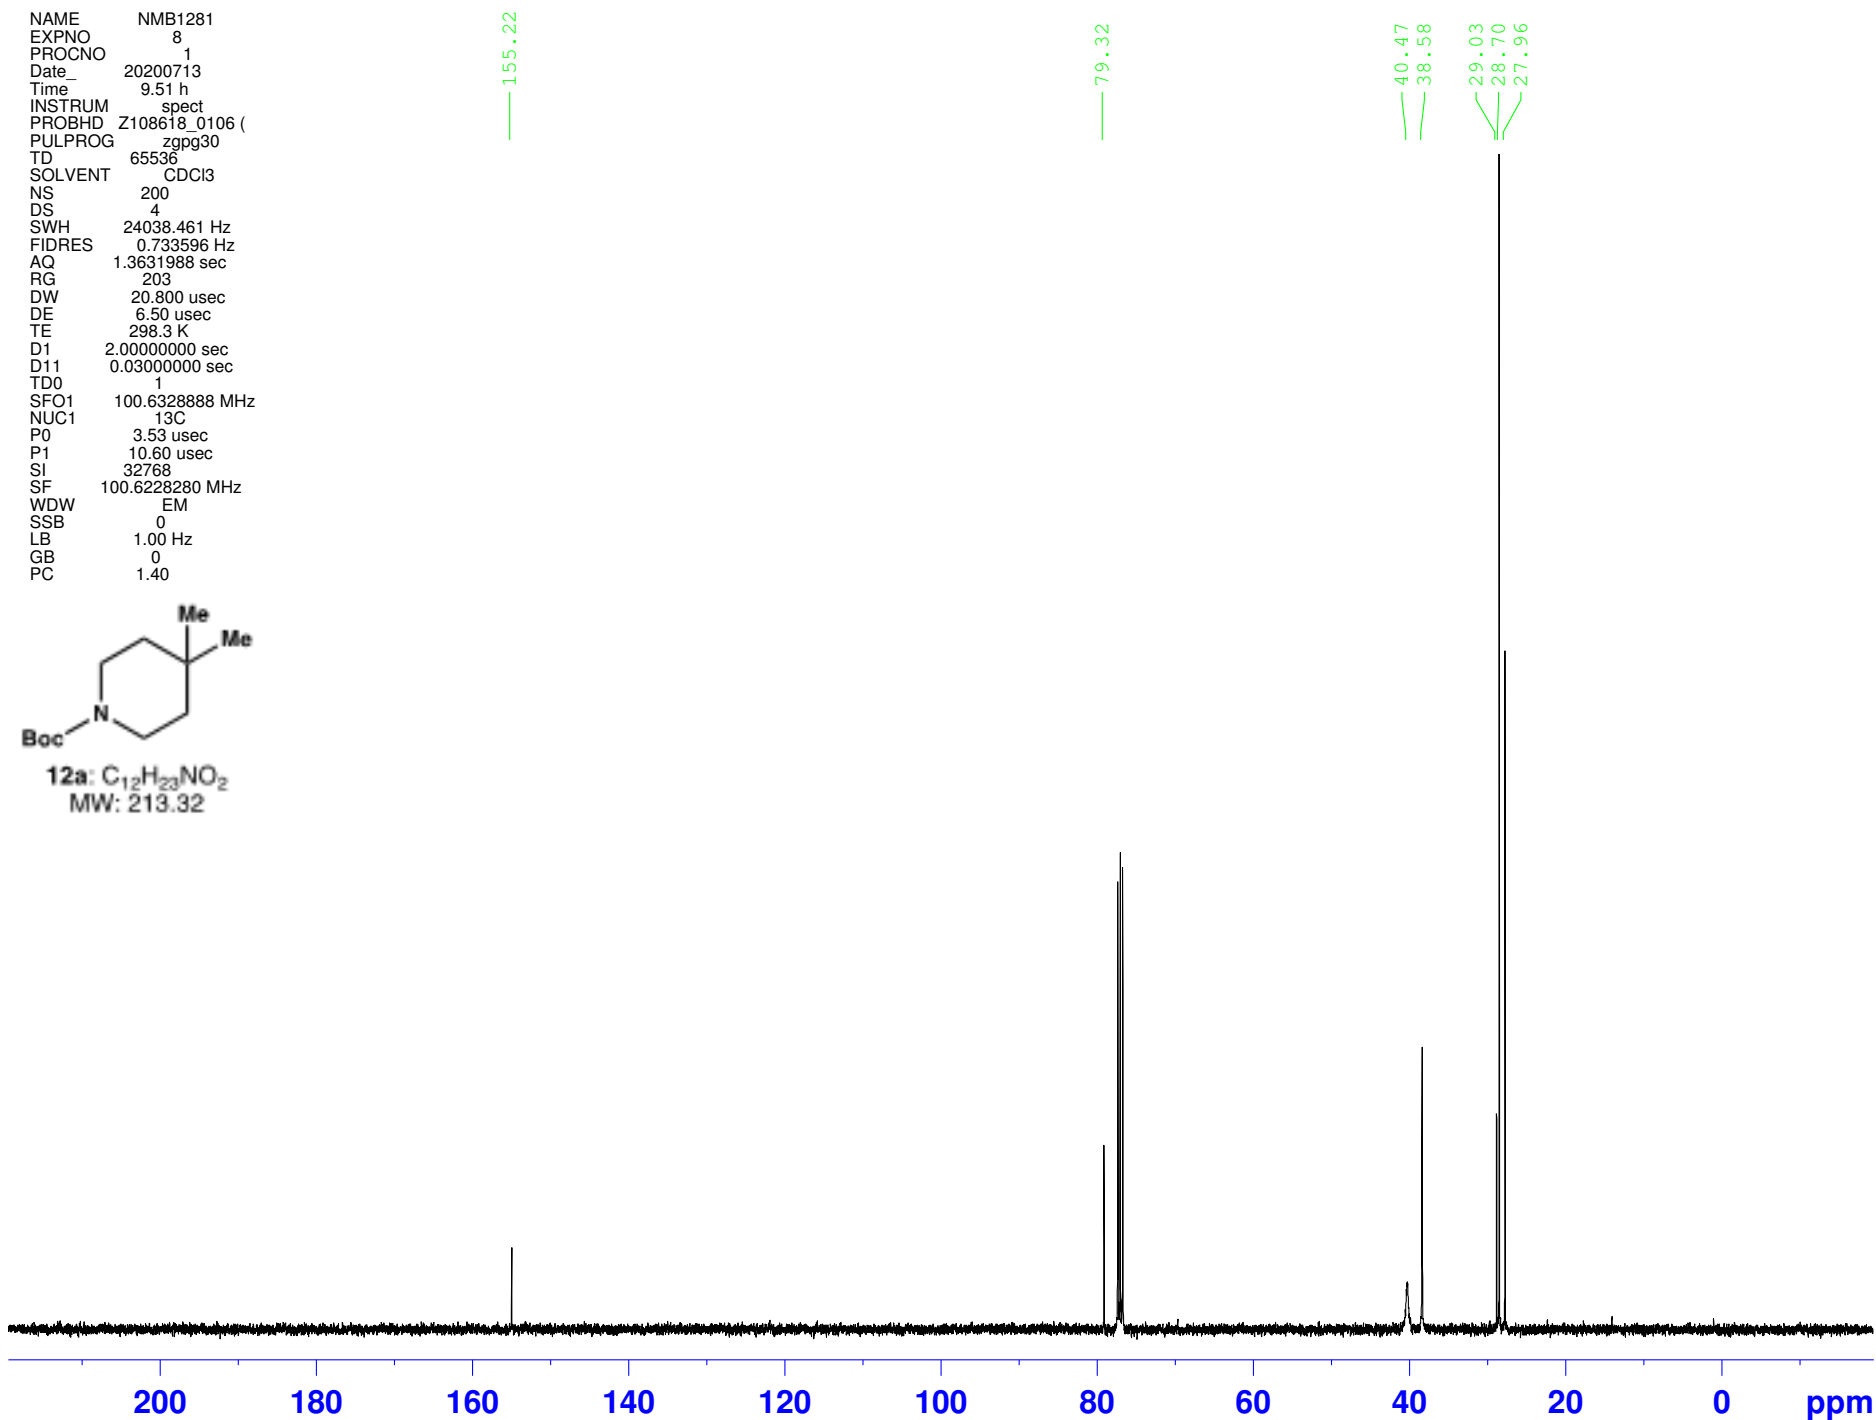

NAME NMB2132 1H  
EXPNO 1  
PROCNO 1  
Date\_ 20201230  
Time 14.09 h  
INSTRUM spect  
PROBHD Z108618\_0106 (  
PULPROG zg30  
TD 65536  
SOLVENT CDCl3  
NS 16  
DS 2  
SWH 8012.820 Hz  
FIDRES 0.244532 Hz  
AQ 4.0894966 sec  
RG 203  
DW 62.400 usec  
DE 16.92 usec  
TE 298.1 K  
D1 1.00000000 sec  
TD0 1  
SFO1 400.1724710 MHz  
NUC1 1H  
P0 5.00 usec  
P1 15.00 usec  
SI 65536  
SF 400.1700000 MHz  
WDW no  
SSB 0  
LB 0.00 Hz  
GB 0  
PC 1.00

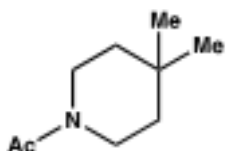

**12b**: C<sub>9</sub>H<sub>17</sub>NO  
MW: 155.24

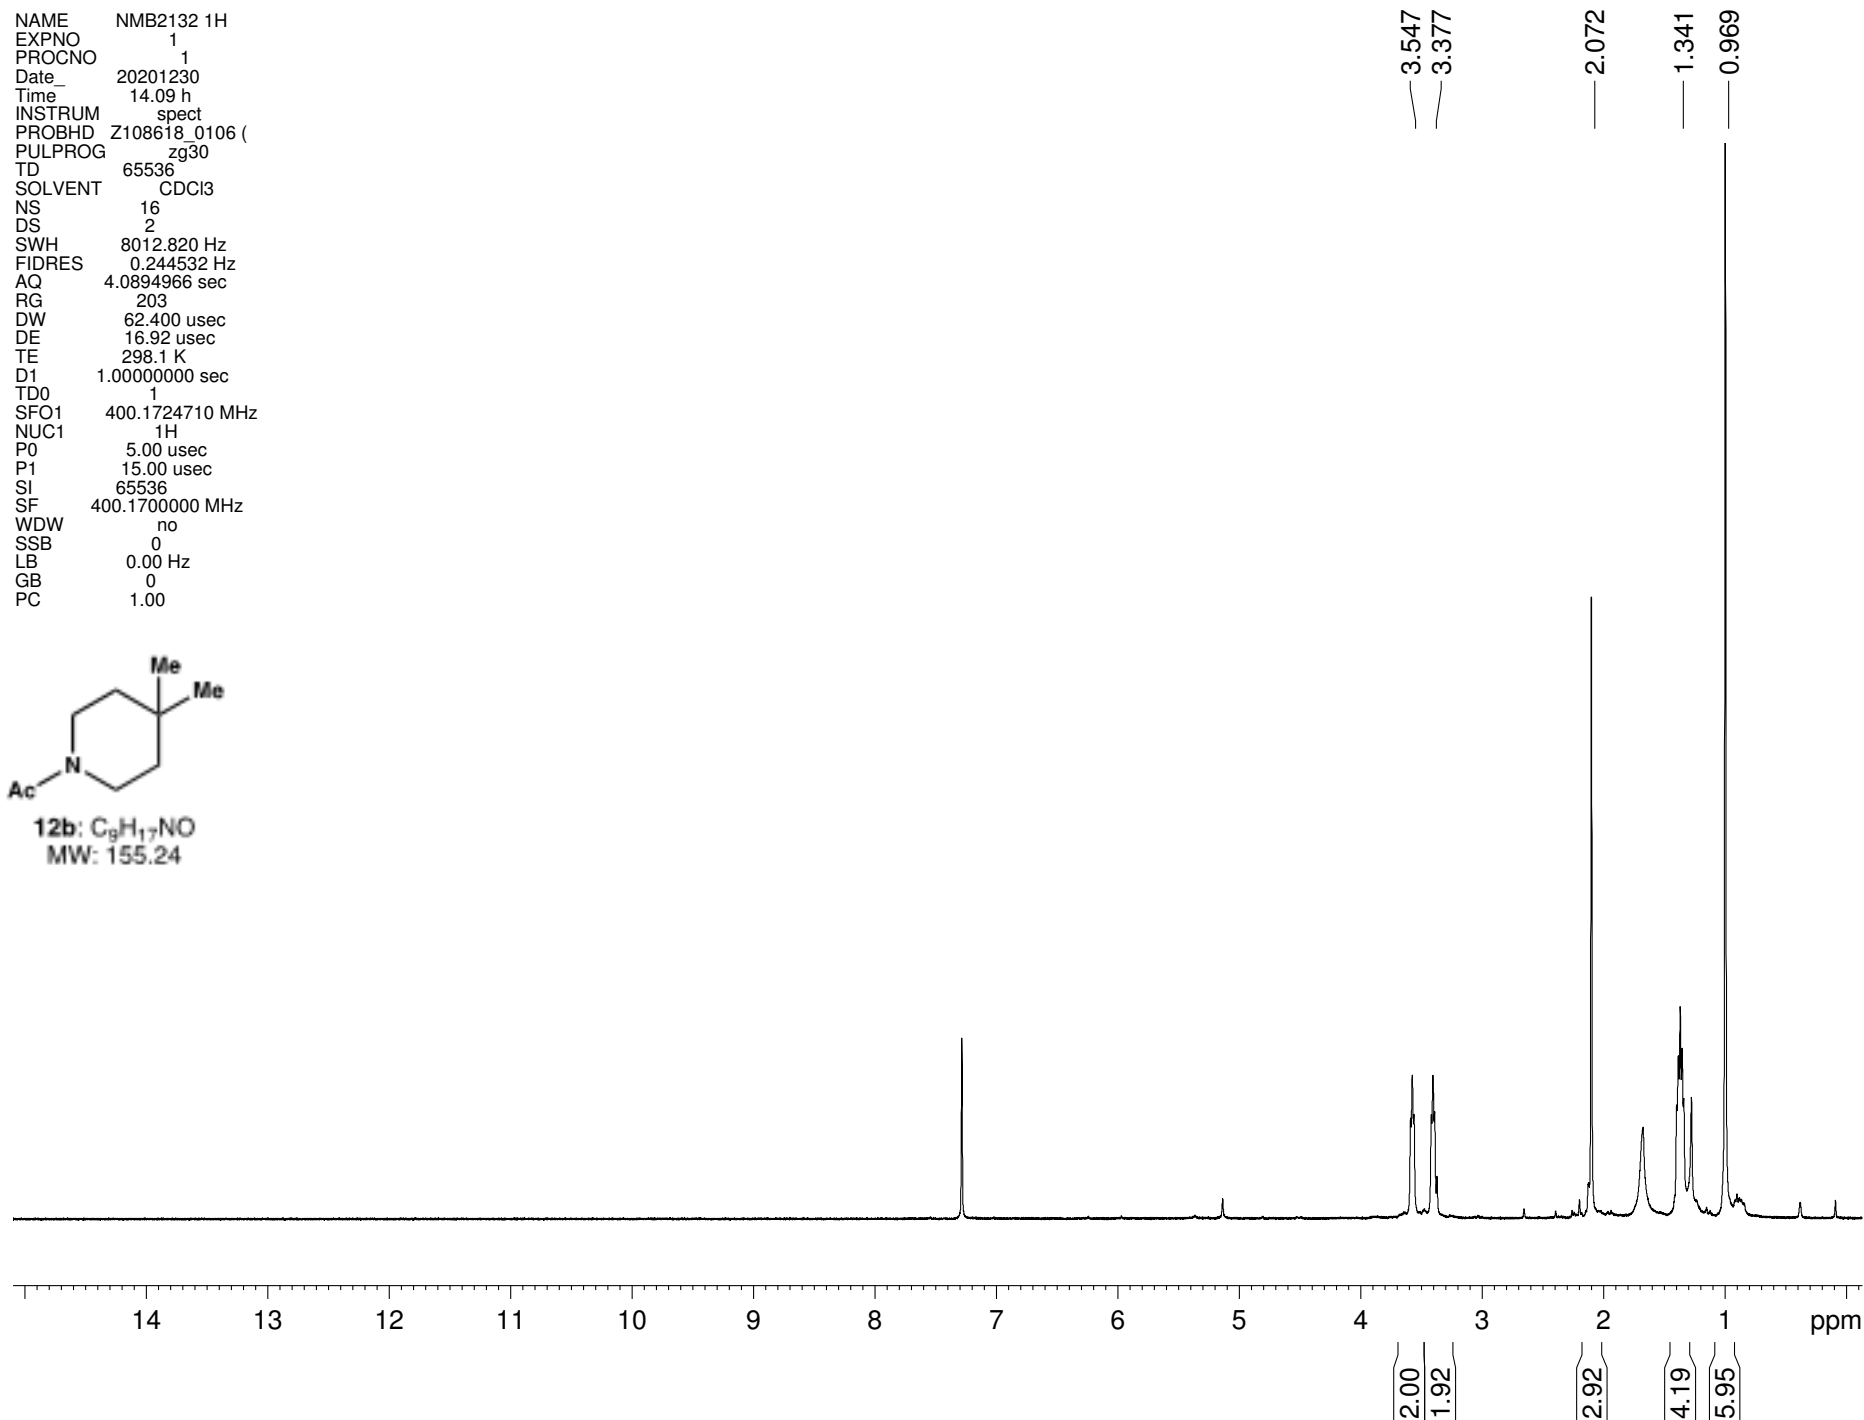

NAME NMB2028 13C  
EXPNO 11  
PROCNO 1  
Date\_ 20200907  
Time 13.59 h  
INSTRUM spect  
PROBHD Z847801\_0093 (  
PULPROG zgpg30  
TD 65536  
SOLVENT CDCl3  
NS 450  
DS 4  
SWH 36231.883 Hz  
FIDRES 1.105709 Hz  
AQ 0.9044468 sec  
RG 203  
DW 13.800 usec  
DE 6.50 usec  
TE 300.0 K  
D1 2.00000000 sec  
D11 0.03000000 sec  
TD0 1  
SFO1 150.9178988 MHz  
NUC1 13C  
P0 3.33 usec  
P1 10.00 usec  
SI 32768  
SF 150.9028090 MHz  
WDW EM  
SSB 0  
LB 1.00 Hz  
GB 0  
PC 1.40

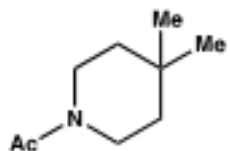

12b: C<sub>9</sub>H<sub>17</sub>NO  
MW: 155.24

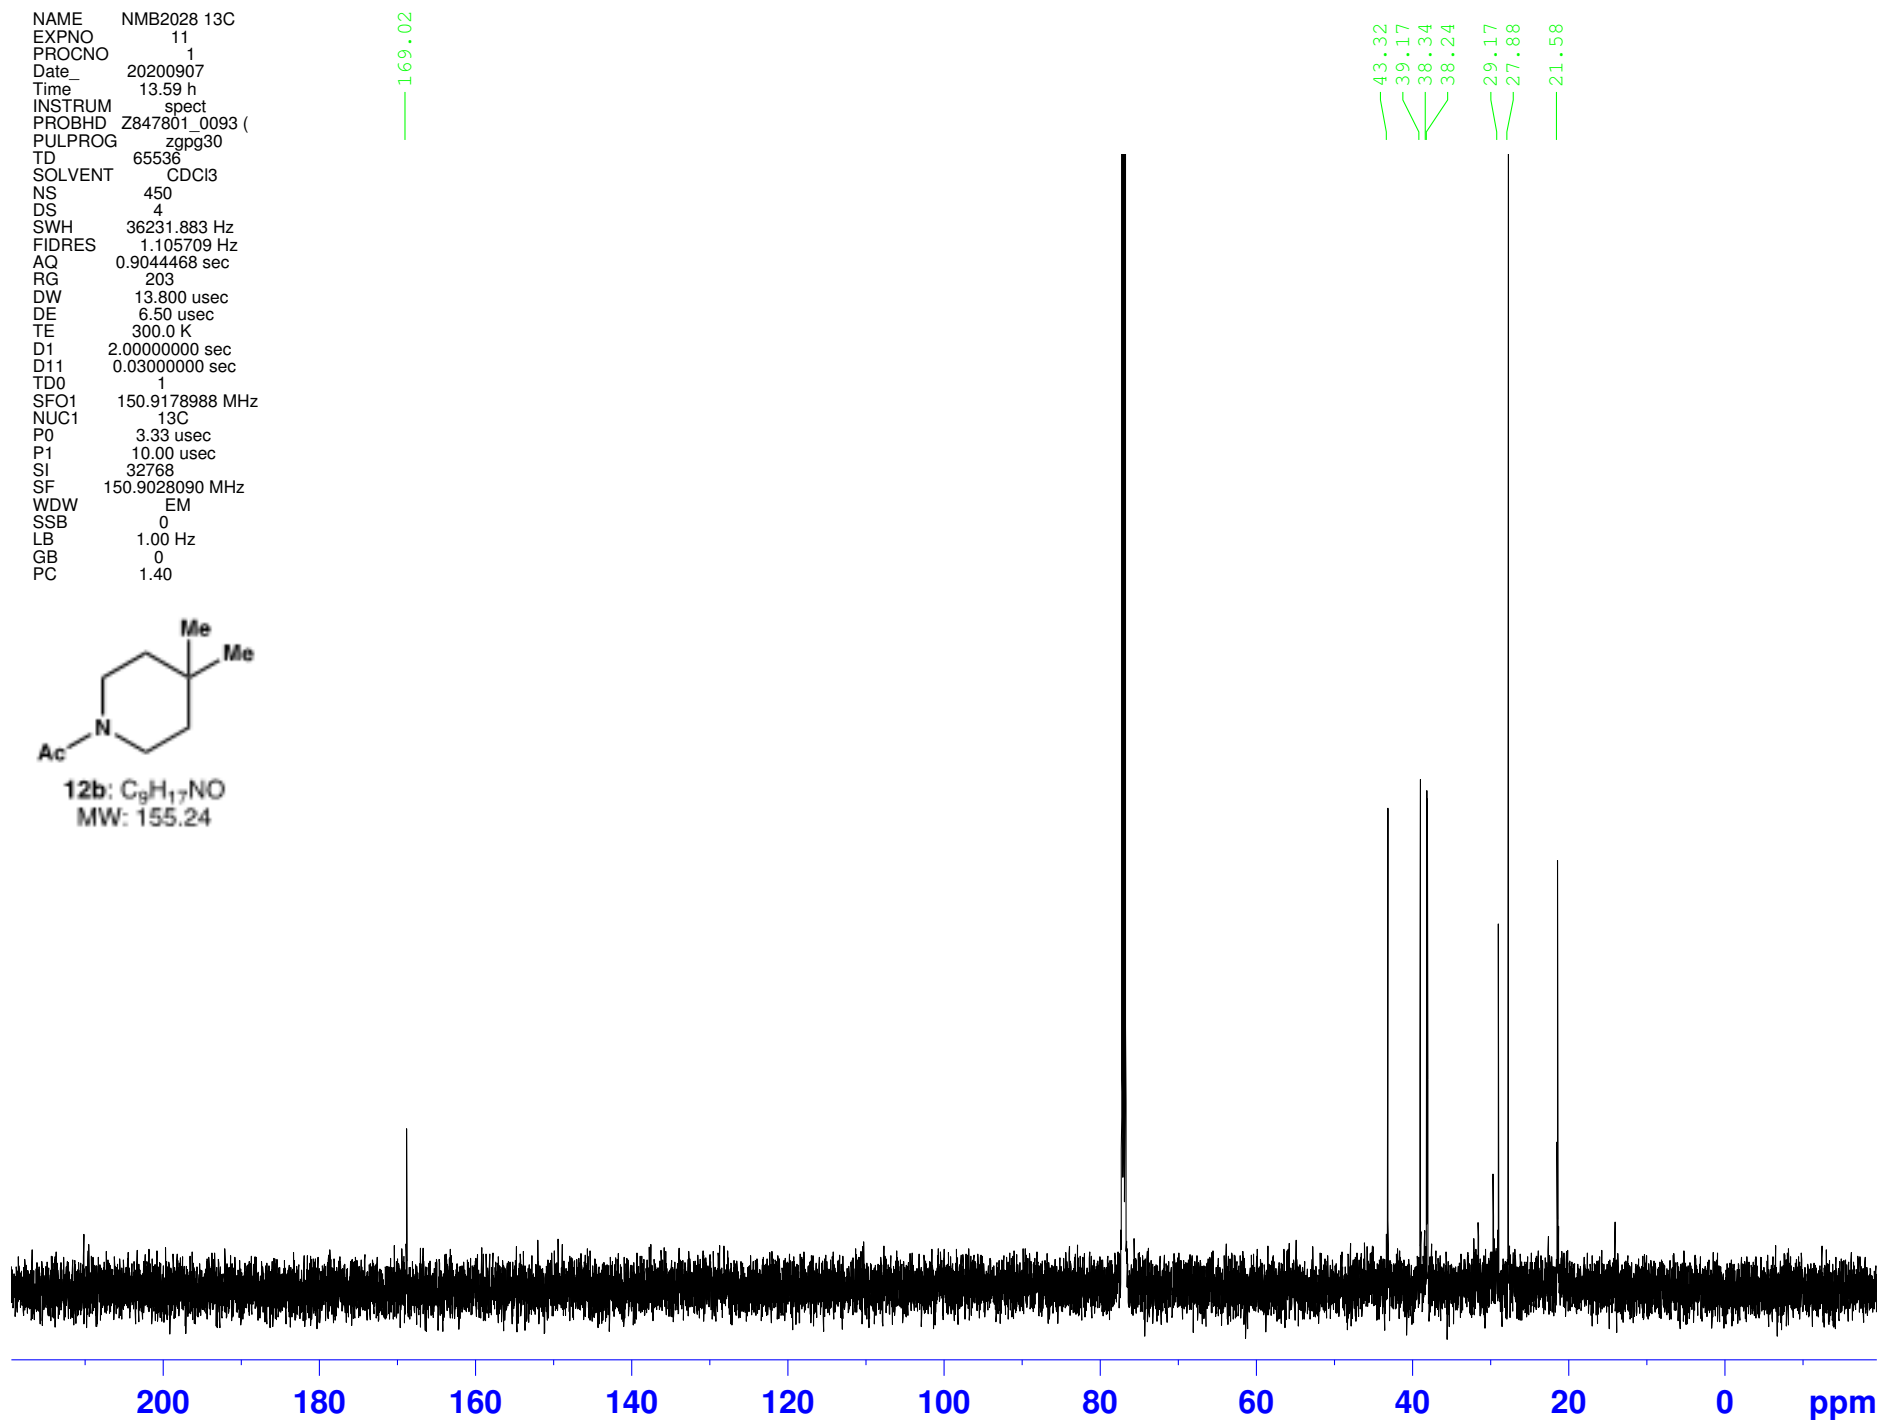

NAME NMB2145 1H  
EXPNO 1  
PROCNO 1  
Date\_ 20210107  
Time 22.04 h  
INSTRUM spect  
PROBHD Z108618\_0106 (  
PULPROG zg30  
TD 65536  
SOLVENT CDCl3  
NS 16  
DS 2  
SWH 8012.820 Hz  
FIDRES 0.244532 Hz  
AQ 4.0894966 sec  
RG 203  
DW 62.400 usec  
DE 16.92 usec  
TE 297.5 K  
D1 1.00000000 sec  
TD0 1  
SFO1 400.1724710 MHz  
NUC1 1H  
P0 5.00 usec  
P1 15.00 usec  
SI 65536  
SF 400.1700099 MHz  
WDW no  
SSB 0  
LB 0.00 Hz  
GB 0  
PC 1.00

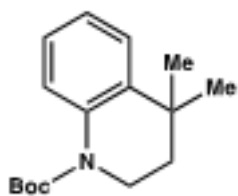

12c: C<sub>18</sub>H<sub>23</sub>NO<sub>2</sub>  
MW: 261.37

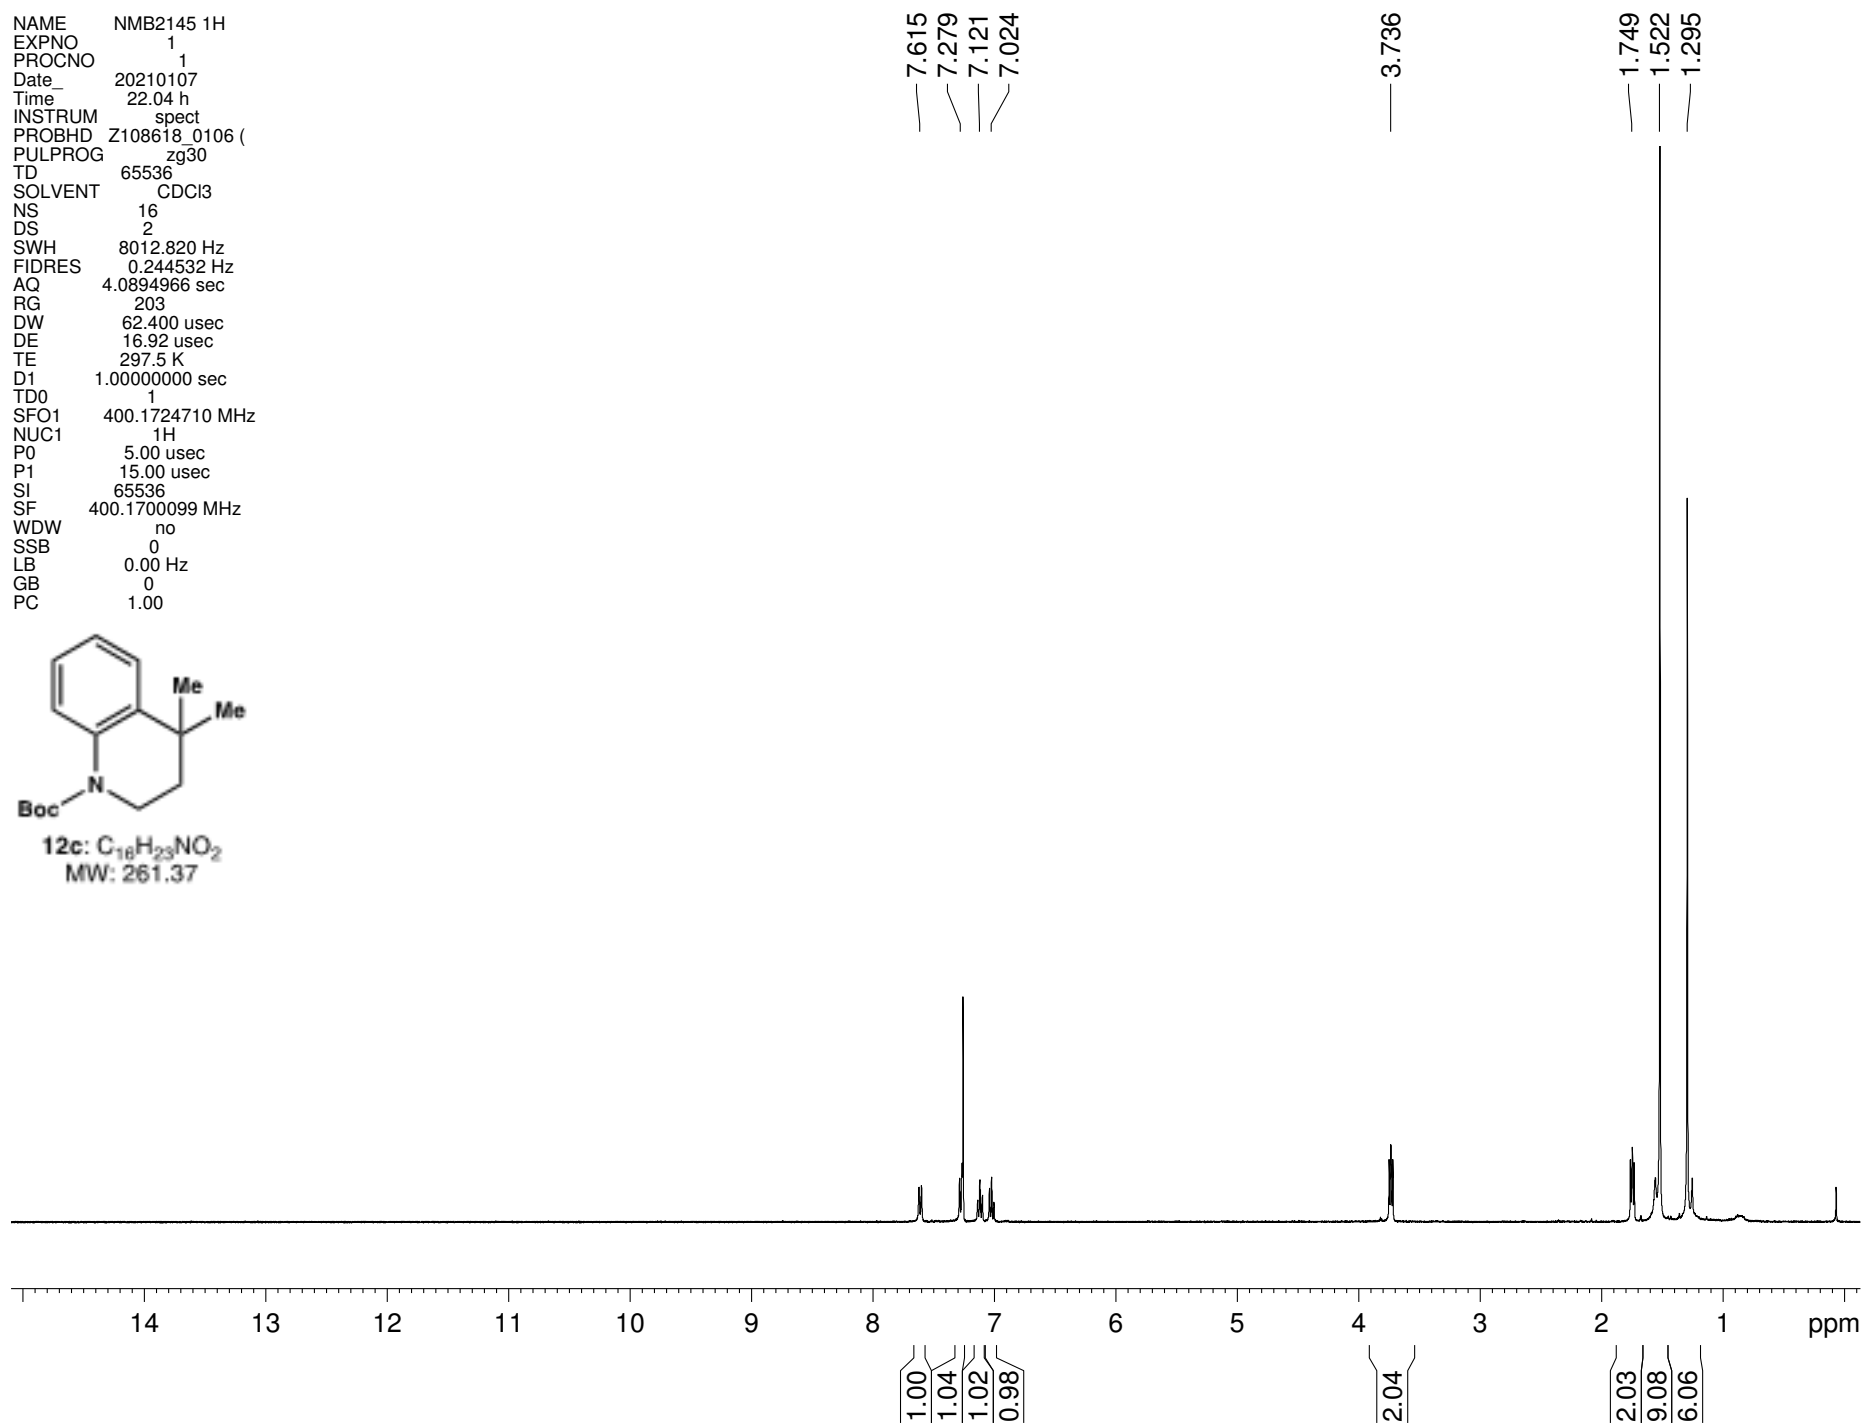

NAME NMB2145 13C  
EXPNO 1  
PROCNO 1  
Date\_ 20210107  
Time\_ 22.38 h  
INSTRUM spect  
PROBHD Z814601\_0054 (  
PULPROG zgpg30  
TD 65536  
SOLVENT CDCl3  
NS 400  
DS 4  
SWH 36231.883 Hz  
FIDRES 1.105709 Hz  
AQ 0.9044468 sec  
RG 203  
DW 13.800 usec  
DE 6.50 usec  
TE 298.3 K  
D1 2.00000000 sec  
D11 0.03000000 sec  
TD0 1  
SFO1 150.9178988 MHz  
NUC1 13C  
P0 3.33 usec  
P1 10.00 usec  
SI 32768  
SF 150.9028090 MHz  
WDW EM  
SSB 0  
LB 1.00 Hz  
GB 0  
PC 1.40

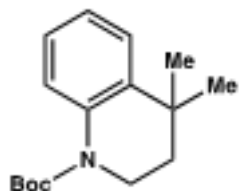

12c: C<sub>18</sub>H<sub>23</sub>NO<sub>2</sub>  
MW: 261.37

153.99  
138.05  
137.31  
125.91  
125.67  
124.47  
123.55  
80.81  
41.86  
38.71  
33.27  
30.35  
28.54

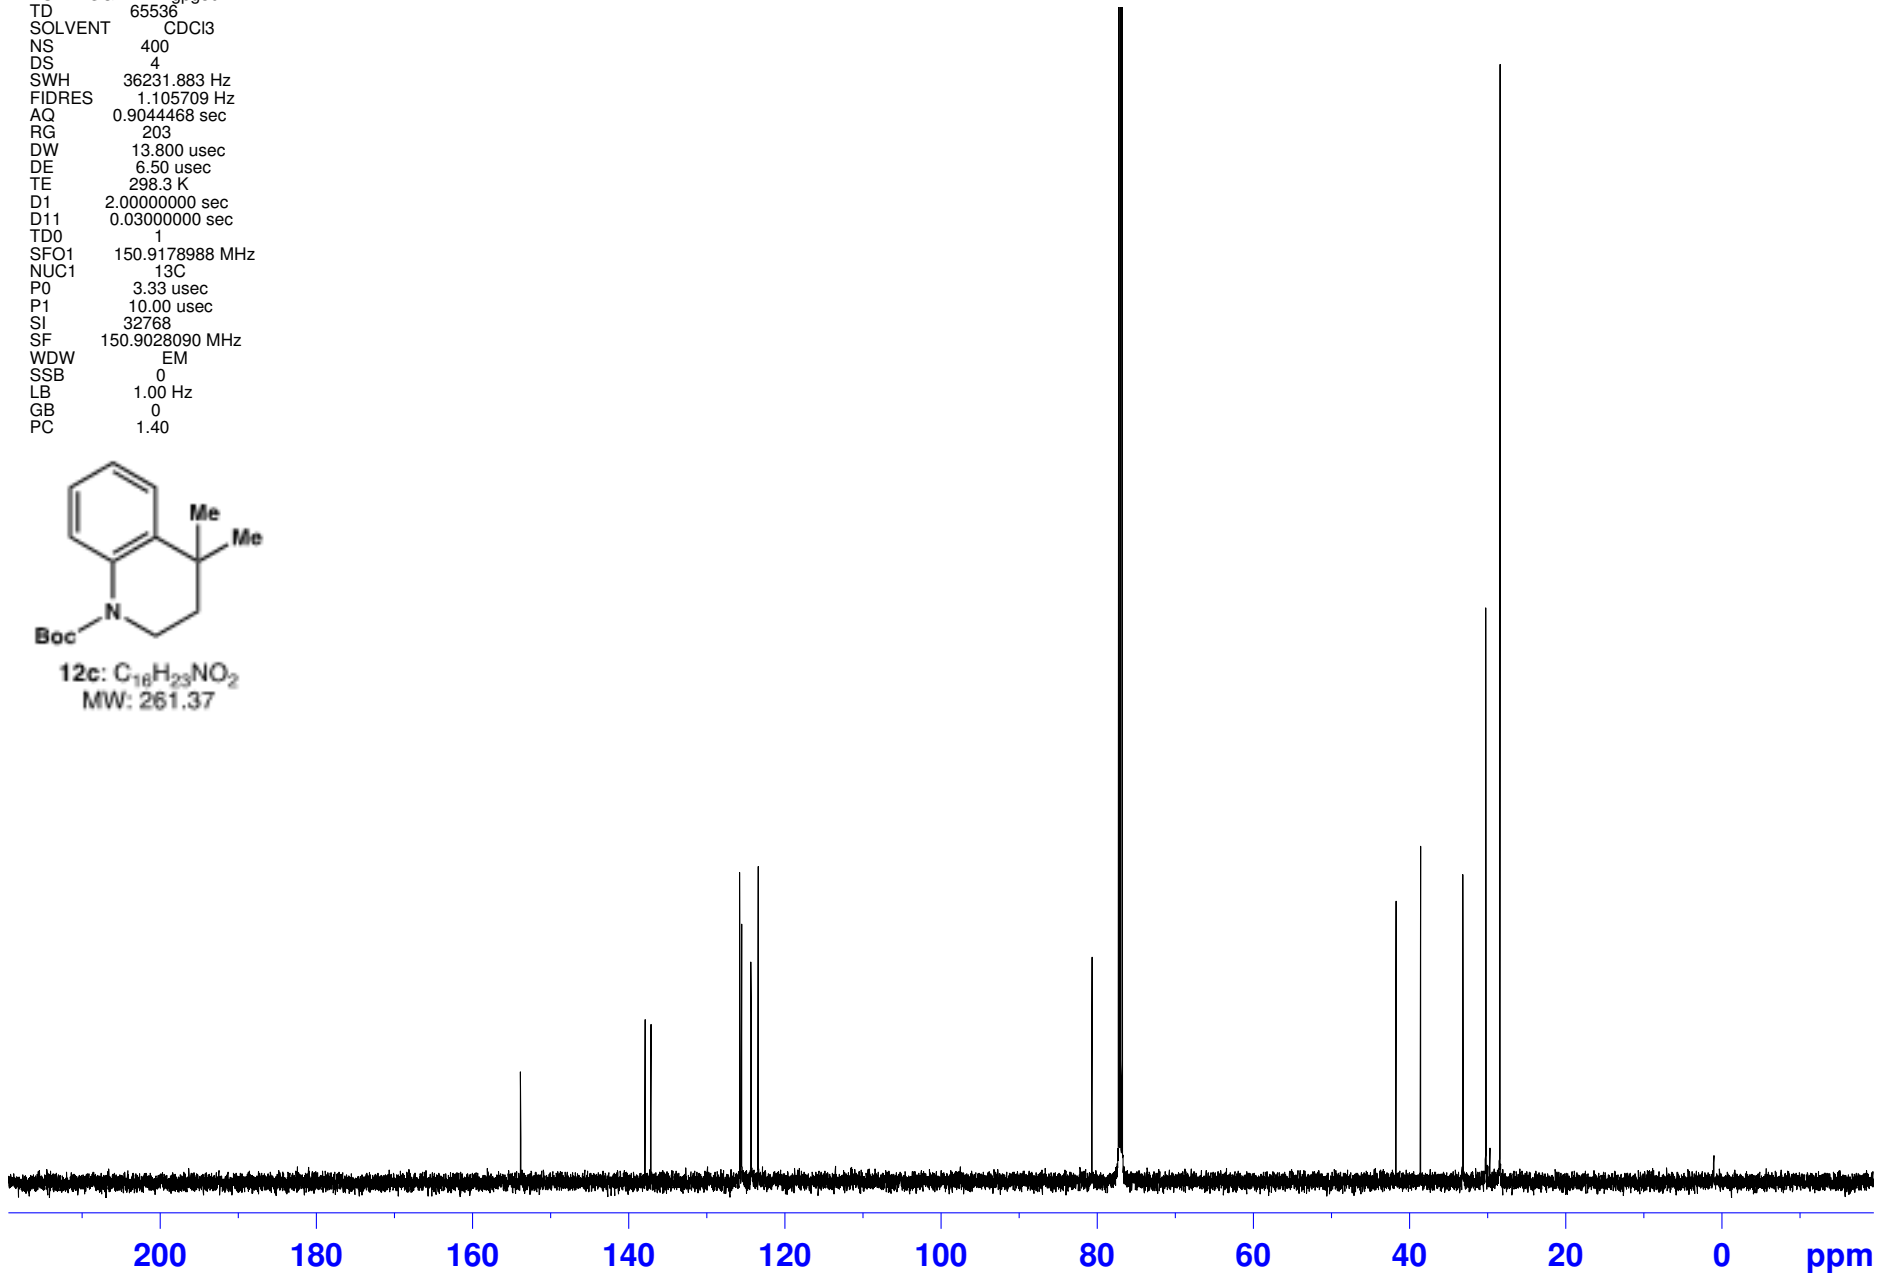

NAME NMB1286 13C  
EXPNO 6  
PROCNO 1  
Date\_ 20200721  
Time 22.43 h  
INSTRUM spect  
PROBHD Z847801\_0093 (  
PULPROG zgpg30  
TD 65536  
SOLVENT CDCl3  
NS 1024  
DS 4  
SWH 36231.883 Hz  
FIDRES 1.105709 Hz  
AQ 0.9044468 sec  
RG 203  
DW 13.800 usec  
DE 6.50 usec  
TE 299.1 K  
D1 2.00000000 sec  
D11 0.03000000 sec  
TD0 1  
SFO1 150.9178988 MHz  
NUC1 13C  
P0 3.33 usec  
P1 10.00 usec  
SI 32768  
SF 150.9028090 MHz  
WDW EM  
SSB 0  
LB 1.00 Hz  
GB 0  
PC 1.40

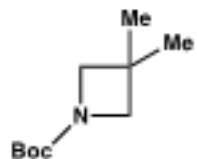

12d: C<sub>10</sub>H<sub>19</sub>NO<sub>2</sub>  
MW: 185.27

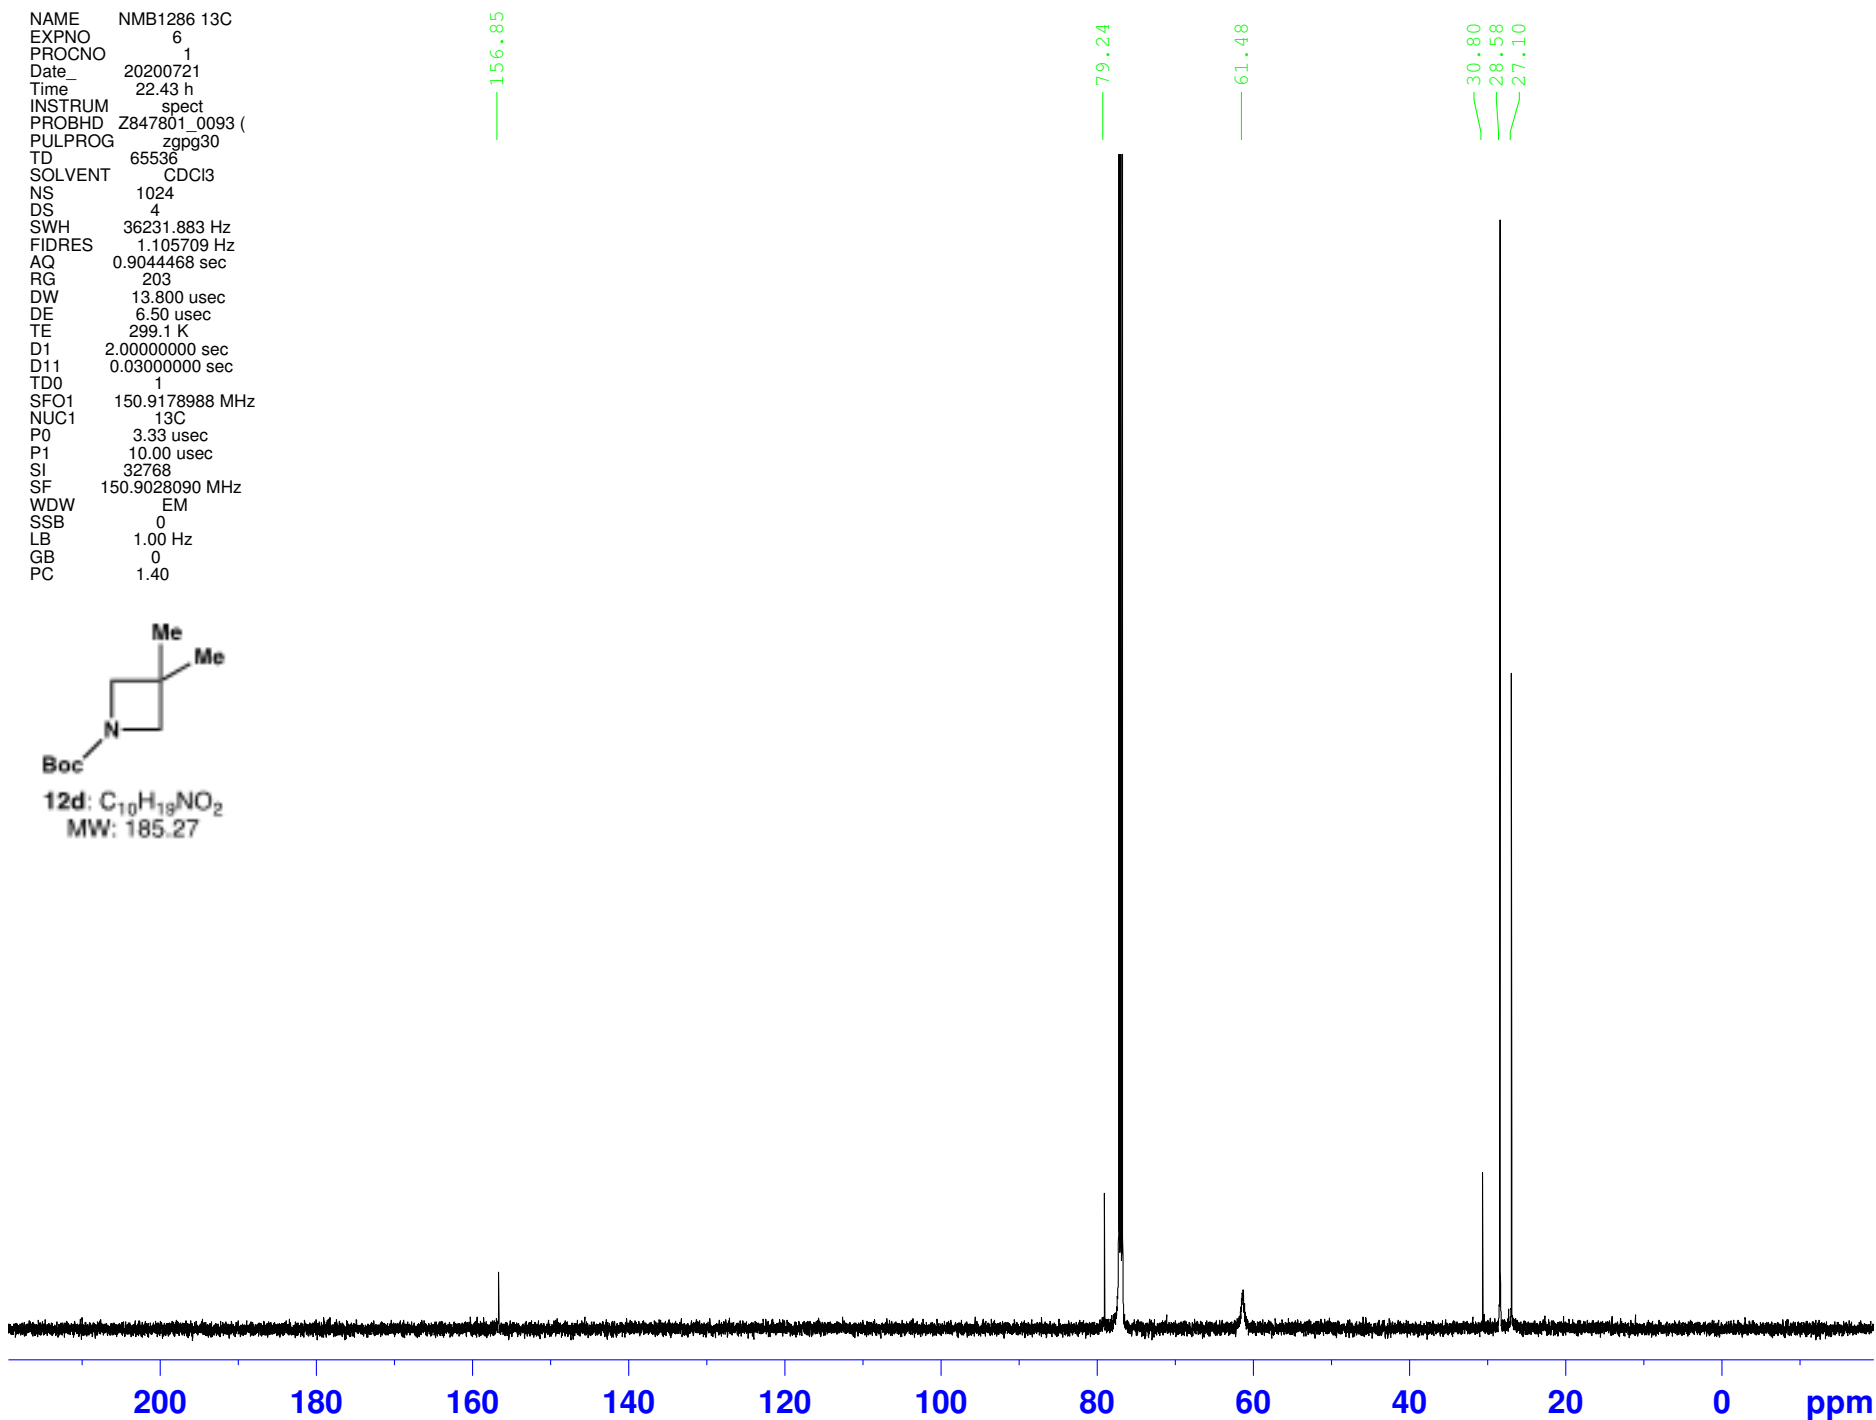



NAME NMB1286  
EXPNO 7  
PROCNO 1  
Date\_ 20200717  
Time 19.22 h  
INSTRUM spect  
PROBHD Z108618\_0106 (  
PULPROG zg30  
TD 65536  
SOLVENT CDCl3  
NS 16  
DS 2  
SWH 8012.820 Hz  
FIDRES 0.244532 Hz  
AQ 4.0894966 sec  
RG 161  
DW 62.400 usec  
DE 16.92 usec  
TE 297.9 K  
D1 1.00000000 sec  
TD0 1  
SFO1 400.1724710 MHz  
NUC1 1H  
P0 5.00 usec  
P1 15.00 usec  
SI 65536  
SF 400.1700000 MHz  
WDW no  
SSB 0  
LB 0.00 Hz  
GB 0  
PC 1.00

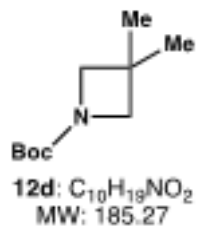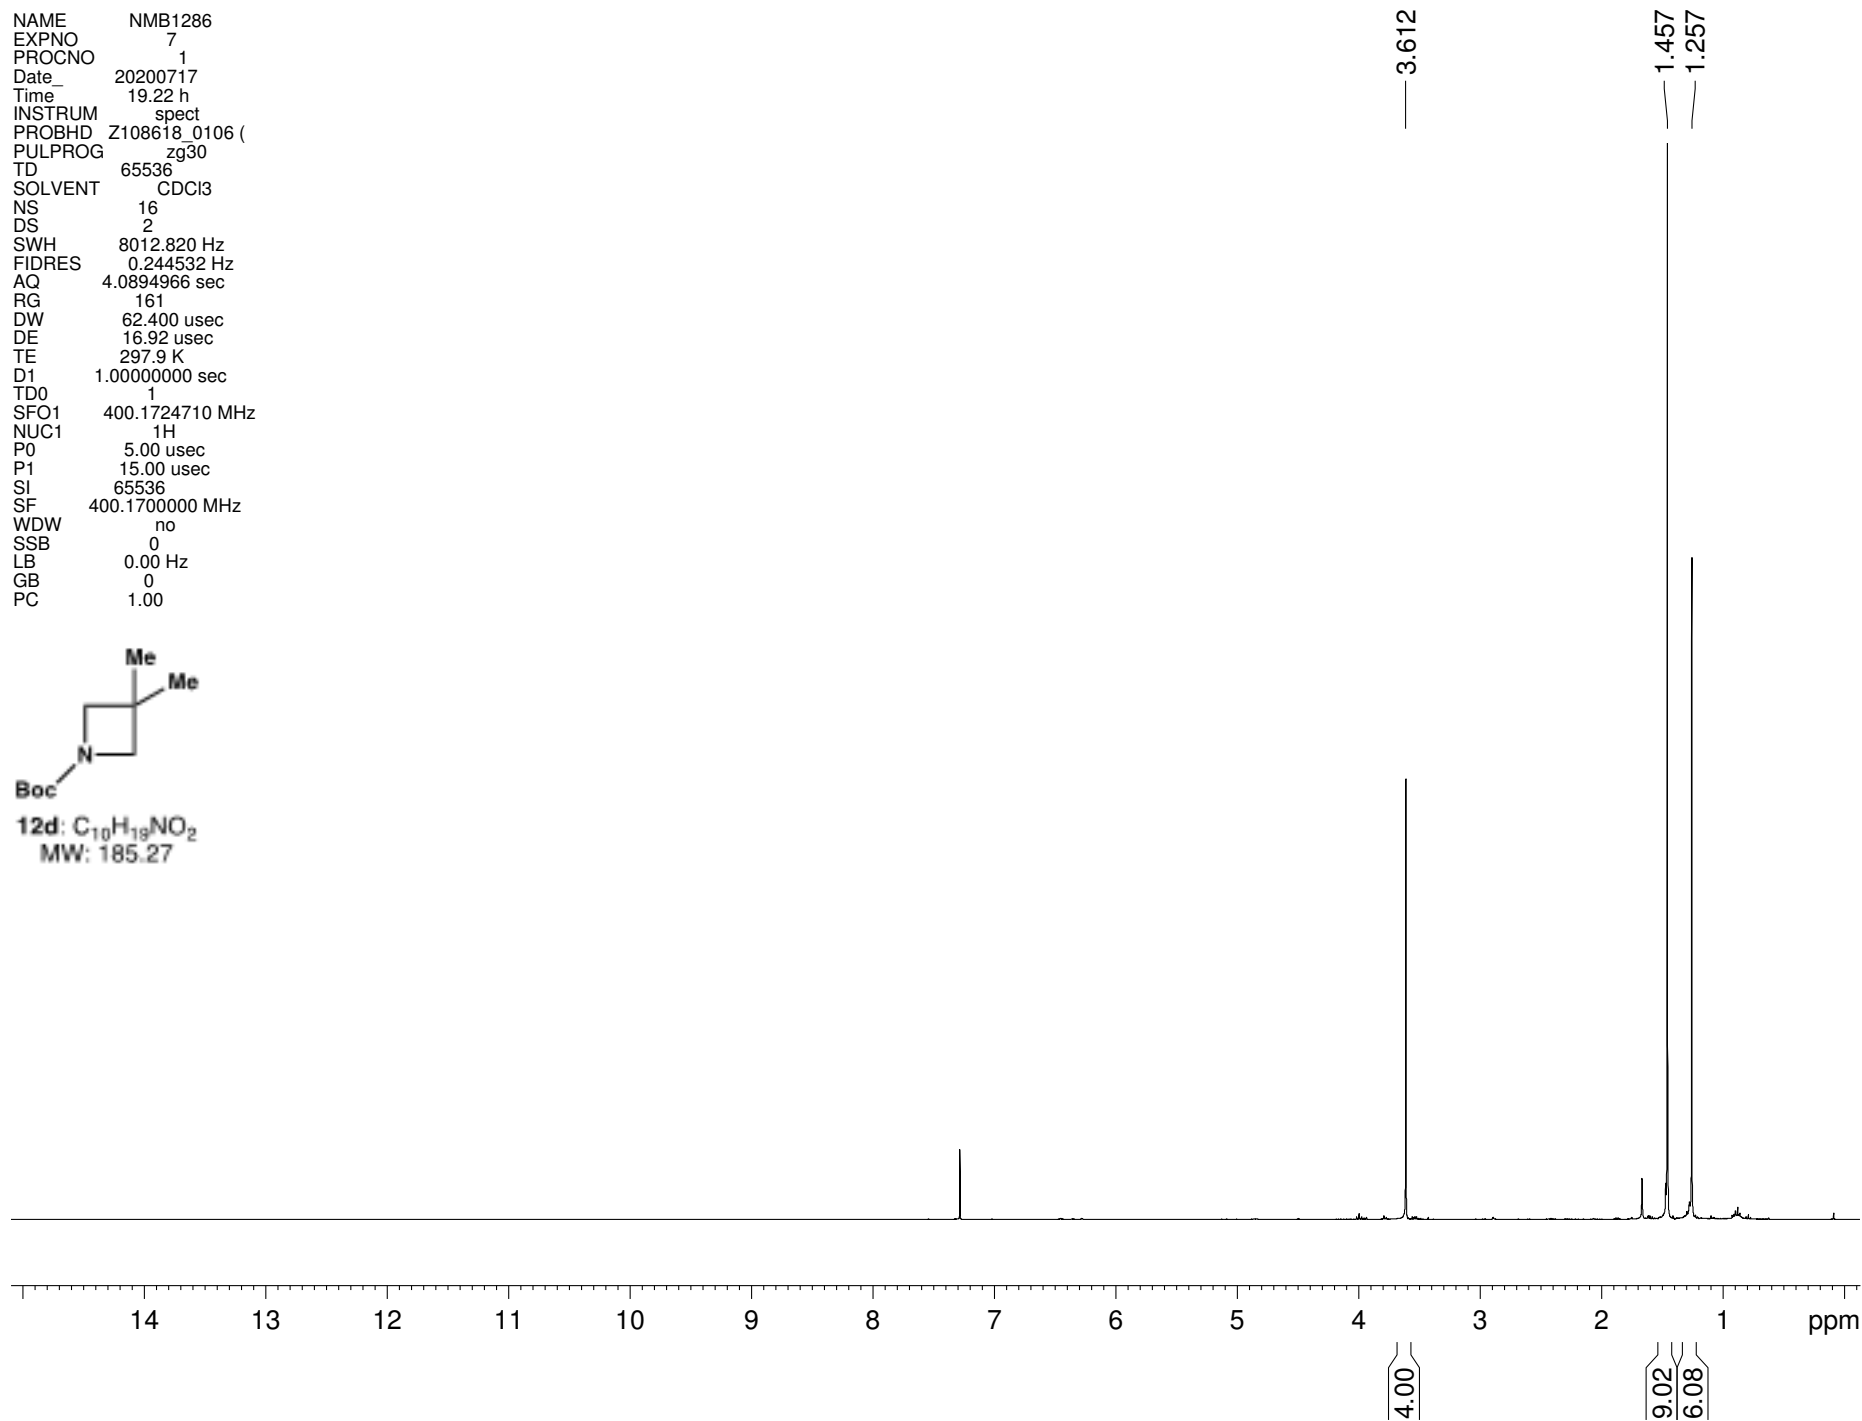

NAME NMB1177AA solvent free  
EXPNO 1  
PROCNO 1  
Date\_ 20200301  
Time 22.16 h  
INSTRUM spect  
PROBHD Z108618\_0106 (  
PULPROG zg30  
TD 65536  
SOLVENT CDCl3  
NS 16  
DS 2  
SWH 8012.820 Hz  
FIDRES 0.244532 Hz  
AQ 4.0894966 sec  
RG 203  
DW 62.400 usec  
DE 16.92 usec  
TE 294.3 K  
D1 1.00000000 sec  
TD0 1  
SFO1 400.1724710 MHz  
NUC1 1H  
P0 5.00 usec  
P1 15.00 usec  
SI 65536  
SF 400.1700113 MHz  
WDW no  
SSB 0  
LB 0.00 Hz  
GB 0  
PC 1.00

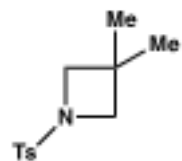

12e: C<sub>12</sub>H<sub>17</sub>NO<sub>2</sub>S  
MW: 239.33

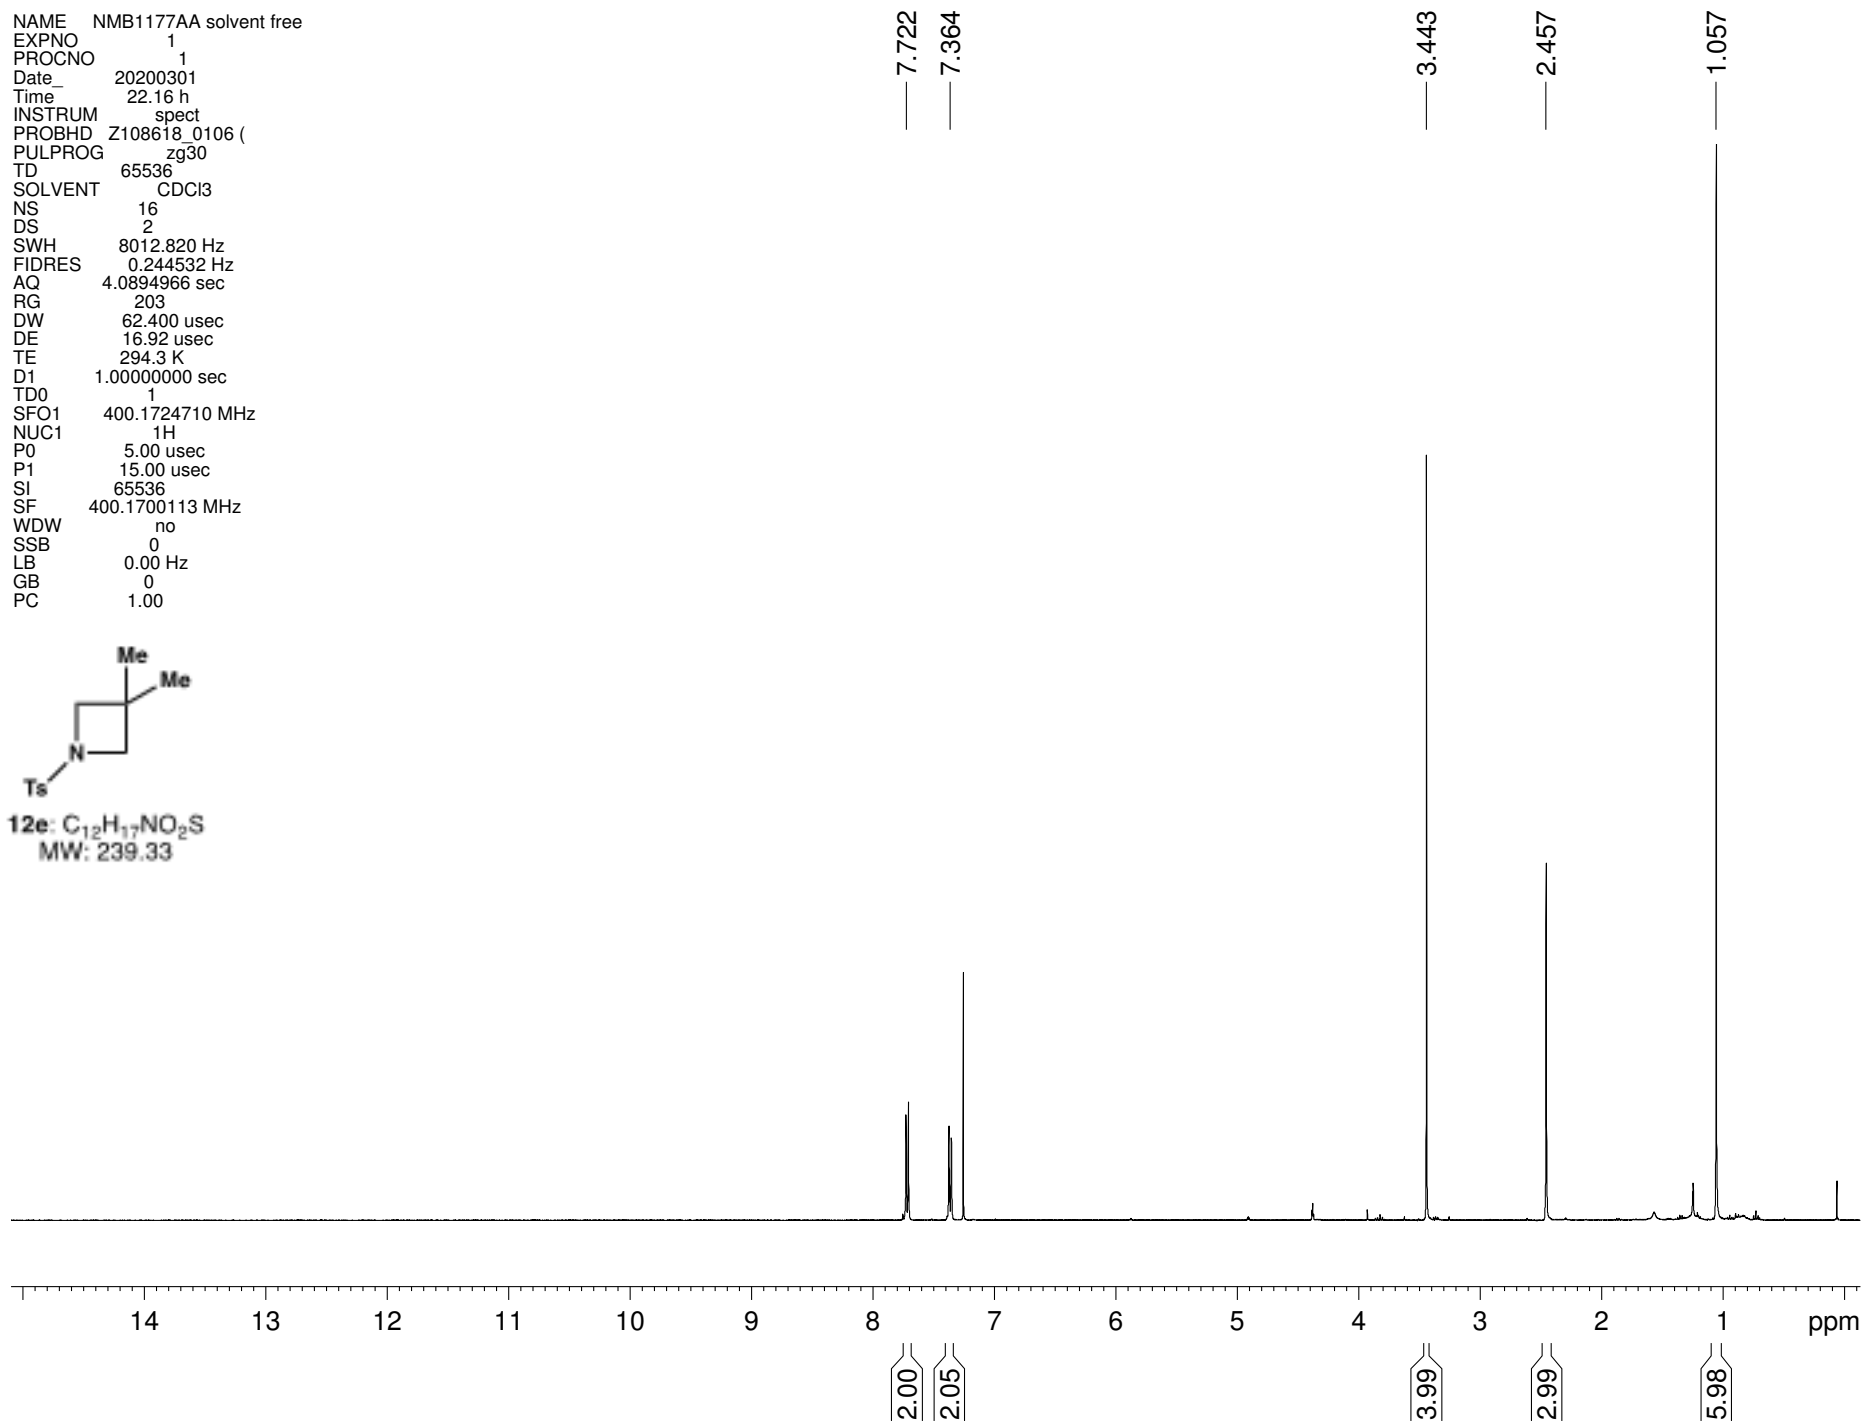

NAME NMB1177AA 13C  
EXPNO 1  
PROCNO 1  
Date\_ 20200225  
Time 11.22 h  
INSTRUM spect  
PROBHD Z847801\_0093 (  
PULPROG zgpg30  
TD 65536  
SOLVENT CDCl3  
NS 133  
DS 4  
SWH 36231.883 Hz  
FIDRES 1.105709 Hz  
AQ 0.9044468 sec  
RG 203  
DW 13.800 usec  
DE 6.50 usec  
TE 299.2 K  
D1 2.00000000 sec  
D11 0.03000000 sec  
TD0 1  
SFO1 150.9178988 MHz  
NUC1 13C  
P0 3.33 usec  
P1 10.00 usec  
SI 32768  
SF 150.9028090 MHz  
WDW EM  
SSB 0  
LB 1.00 Hz  
GB 0  
PC 1.40

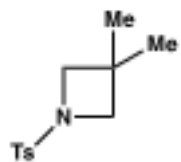

12e: C<sub>12</sub>H<sub>17</sub>NO<sub>2</sub>S  
MW: 239.33

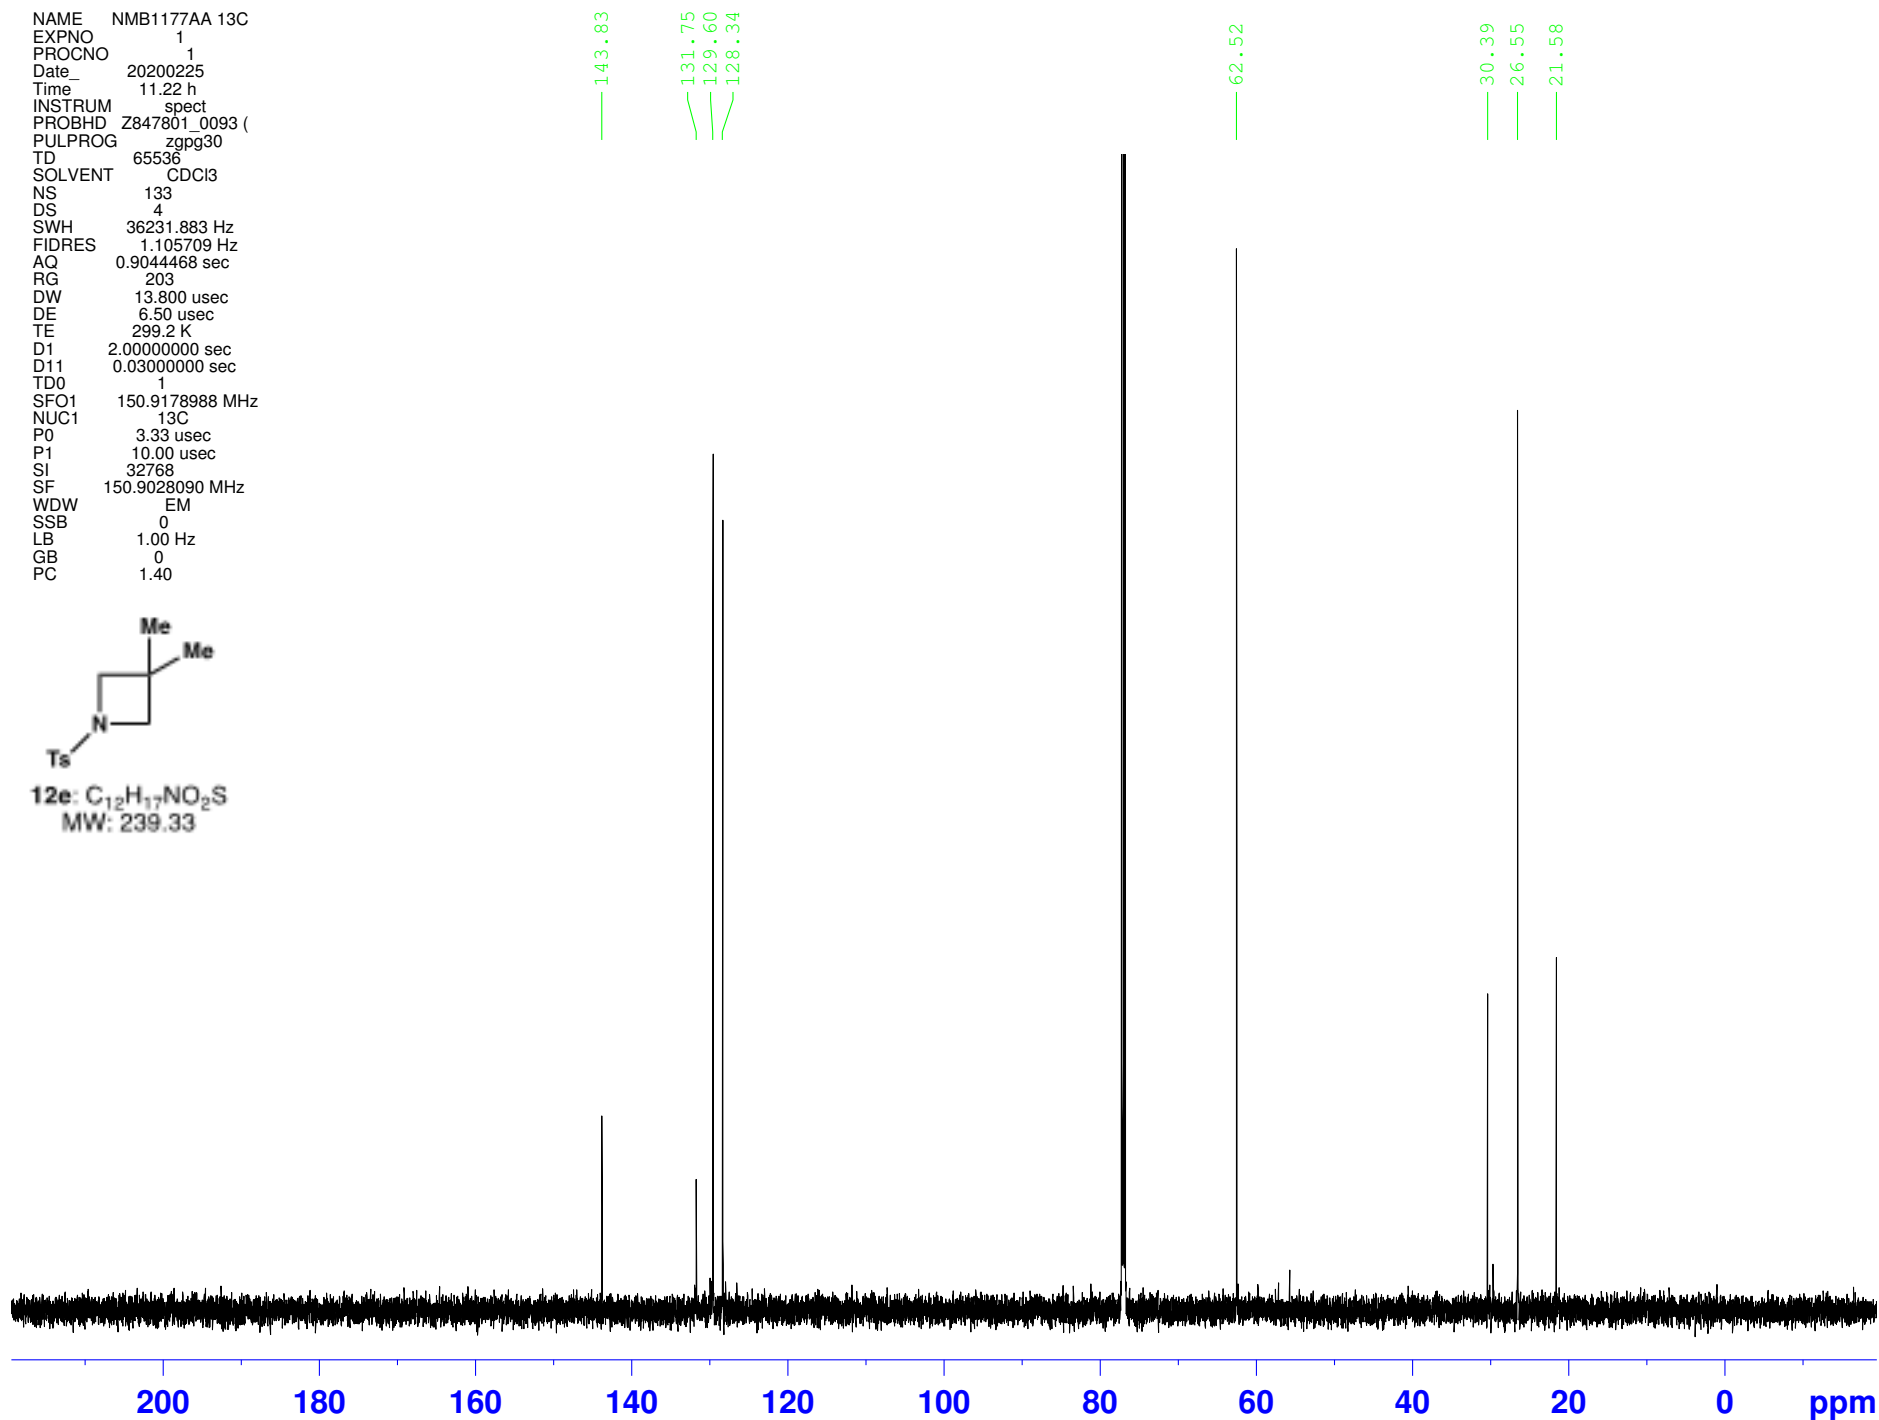

NAME NMB1293 A 1H  
 EXPNO 1  
 PROCNO 1  
 Date\_ 20210123  
 Time 9.32 h  
 INSTRUM spect  
 PROBHD Z108618\_0106 (  
 PULPROG zg30  
 TD 65536  
 SOLVENT CDCl3  
 NS 16  
 DS 2  
 SWH 8012.820 Hz  
 FIDRES 0.244532 Hz  
 AQ 4.0894966 sec  
 RG 203  
 DW 62.400 usec  
 DE 16.92 usec  
 TE 297.8 K  
 D1 1.00000000 sec  
 TD0 1  
 SFO1 400.1724710 MHz  
 NUC1 1H  
 P0 5.00 usec  
 P1 15.00 usec  
 SI 65536  
 SF 400.1700000 MHz  
 WDW no  
 SSB 0  
 LB 0.00 Hz  
 GB 0  
 PC 1.00

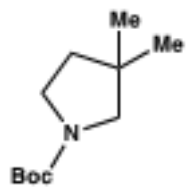

**12f**: C<sub>11</sub>H<sub>21</sub>NO<sub>2</sub>  
 MW: 199.29

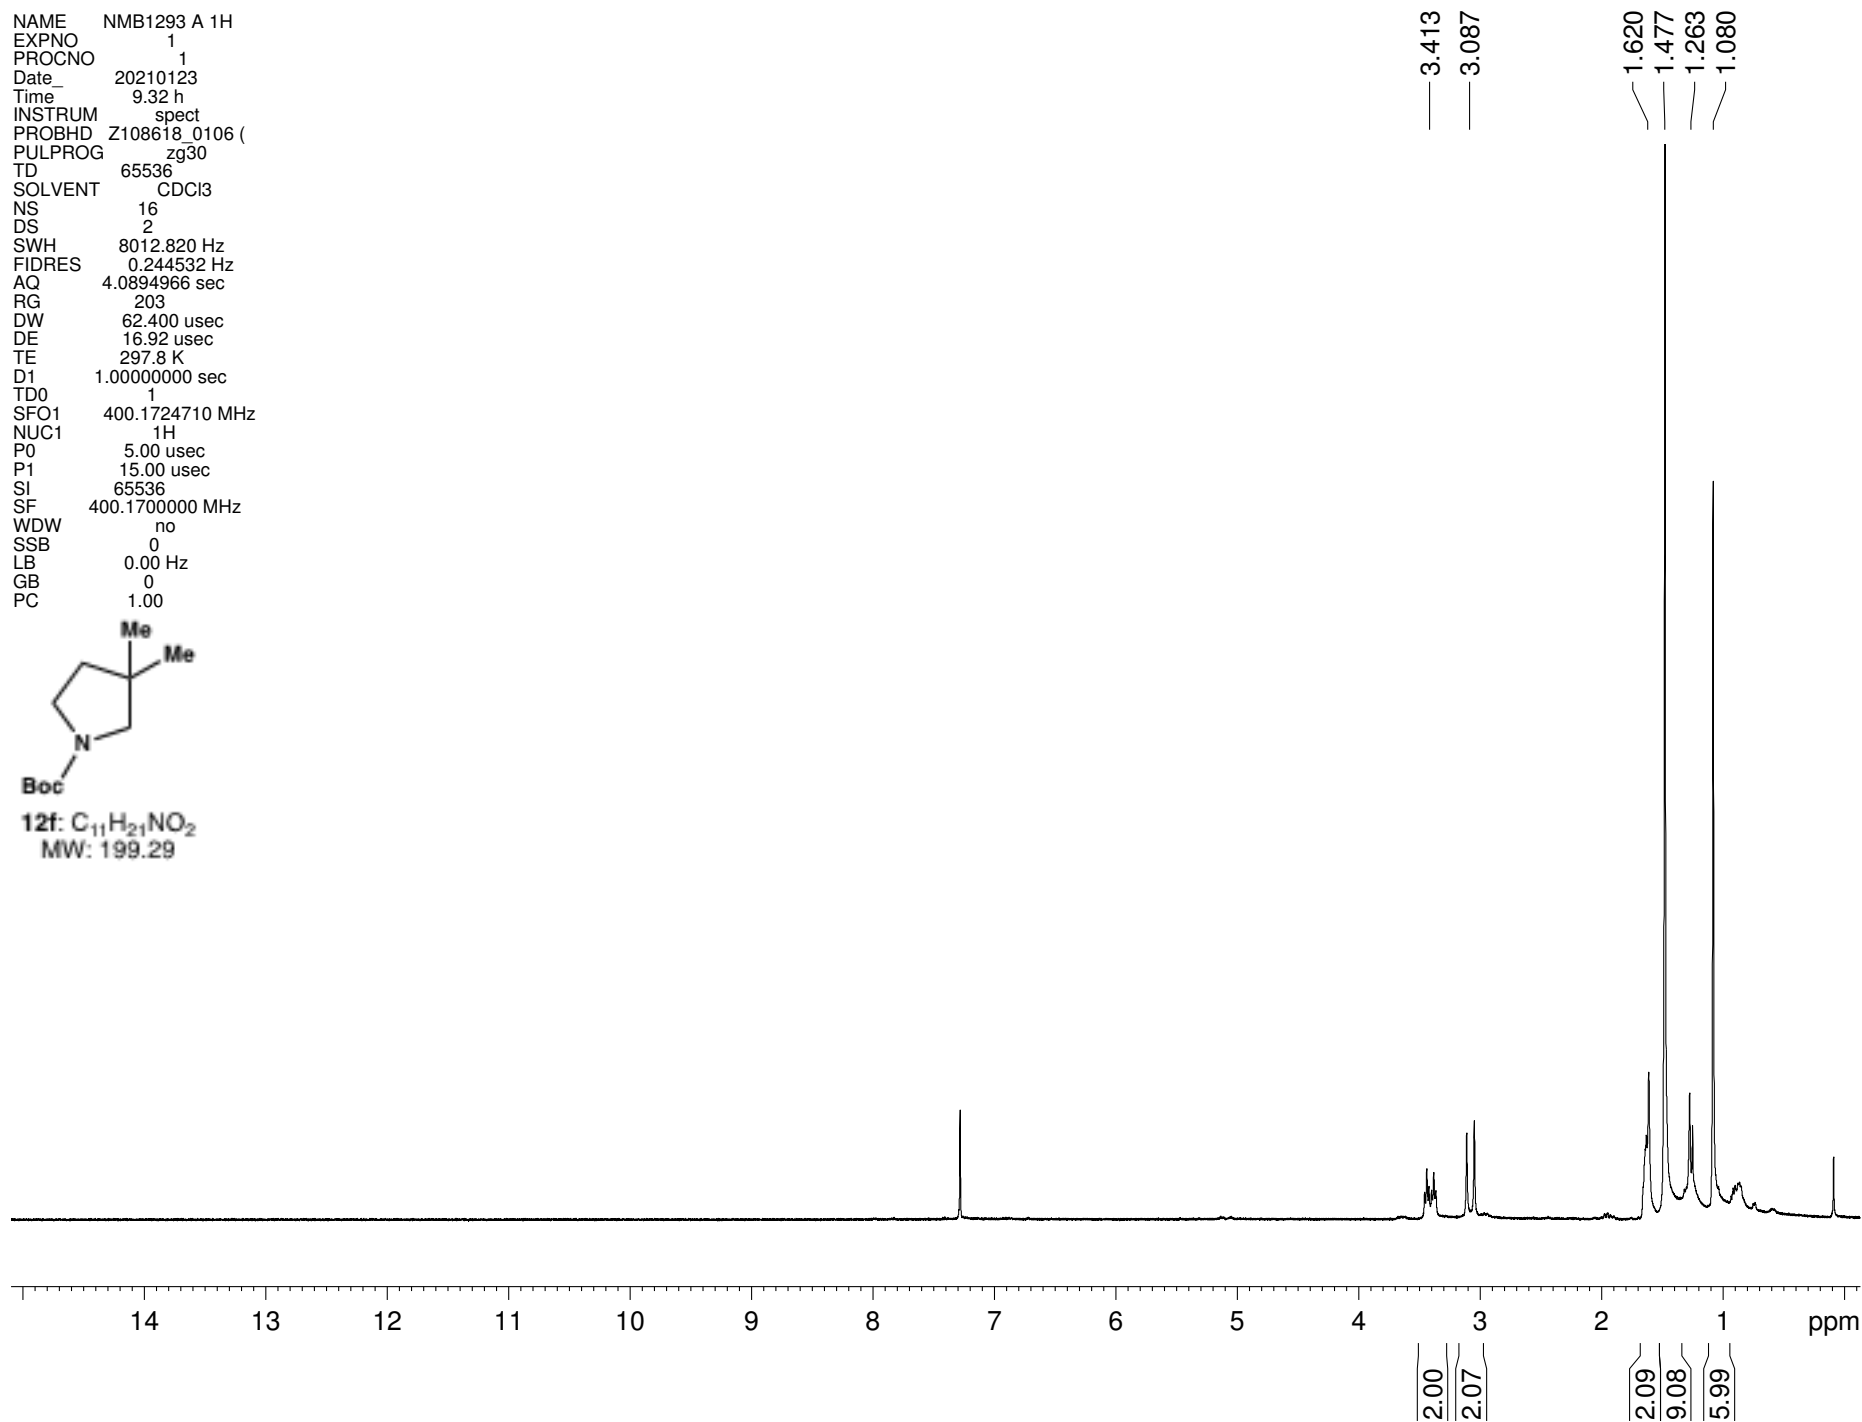

NAME NMB1293 lotsa scans  
EXPNO 1  
PROCNO 1  
Date\_ 20210224  
Time 8.08 h  
INSTRUM spect  
PROBHD Z814601\_0054 (  
PULPROG zgpg30  
TD 65536  
SOLVENT CDCl3  
NS 12419  
DS 4  
SWH 36231.883 Hz  
FIDRES 1.105709 Hz  
AQ 0.9044468 sec  
RG 203  
DW 13.800 usec  
DE 6.50 usec  
TE 298.5 K  
D1 2.00000000 sec  
D11 0.03000000 sec  
TD0 1  
SFO1 150.9178988 MHz  
NUC1 13C  
P0 3.33 usec  
P1 10.00 usec  
SI 32768  
SF 150.9028090 MHz  
WDW EM  
SSB 0  
LB 1.00 Hz  
GB 0  
PC 1.40

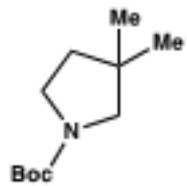

12f: C<sub>11</sub>H<sub>21</sub>NO<sub>2</sub>  
MW: 199.29

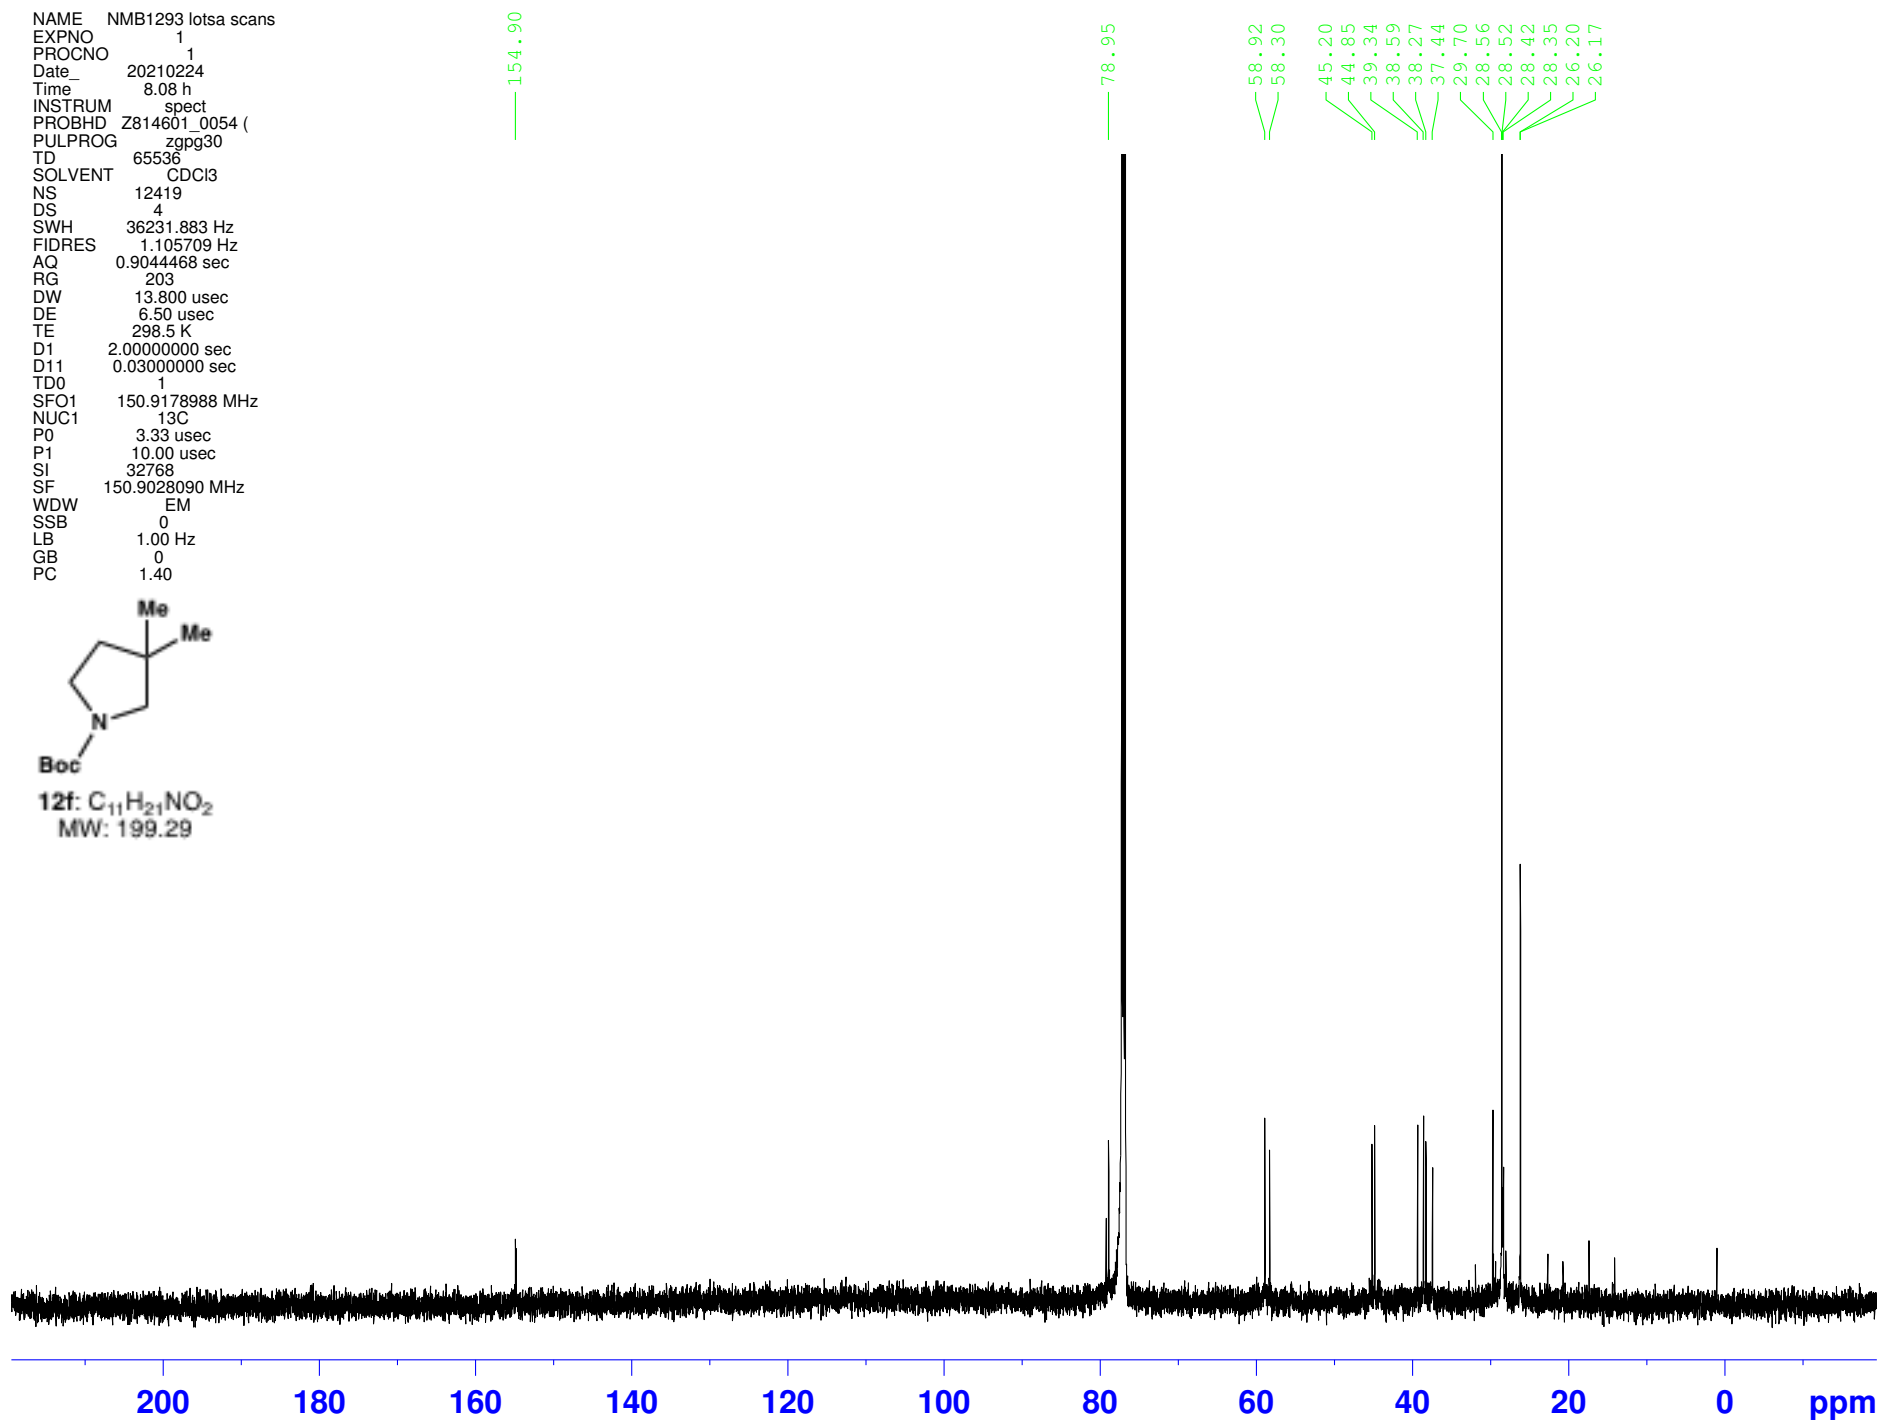

NAME NMB2020  
 EXPNO 8  
 PROCNO 1  
 Date\_ 20200904  
 Time 15.52 h  
 INSTRUM spect  
 PROBHD Z847801\_0093 (  
 PULPROG zg30  
 TD 65536  
 SOLVENT CDCl3  
 NS 16  
 DS 2  
 SWH 12019.230 Hz  
 FIDRES 0.366798 Hz  
 AQ 2.7263477 sec  
 RG 203  
 DW 41.600 usec  
 DE 10.42 usec  
 TE 298.6 K  
 D1 1.00000000 sec  
 TD0 1  
 SFO1 600.1337058 MHz  
 NUC1 1H  
 P0 5.00 usec  
 P1 15.00 usec  
 SI 65536  
 SF 600.1300143 MHz  
 WDW no  
 SSB 0  
 LB 0.00 Hz  
 GB 0  
 PC 1.00

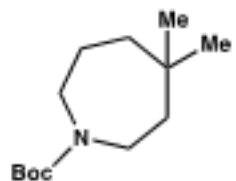

**12g: C<sub>13</sub>H<sub>25</sub>NO<sub>2</sub>**  
**MW: 227.35**

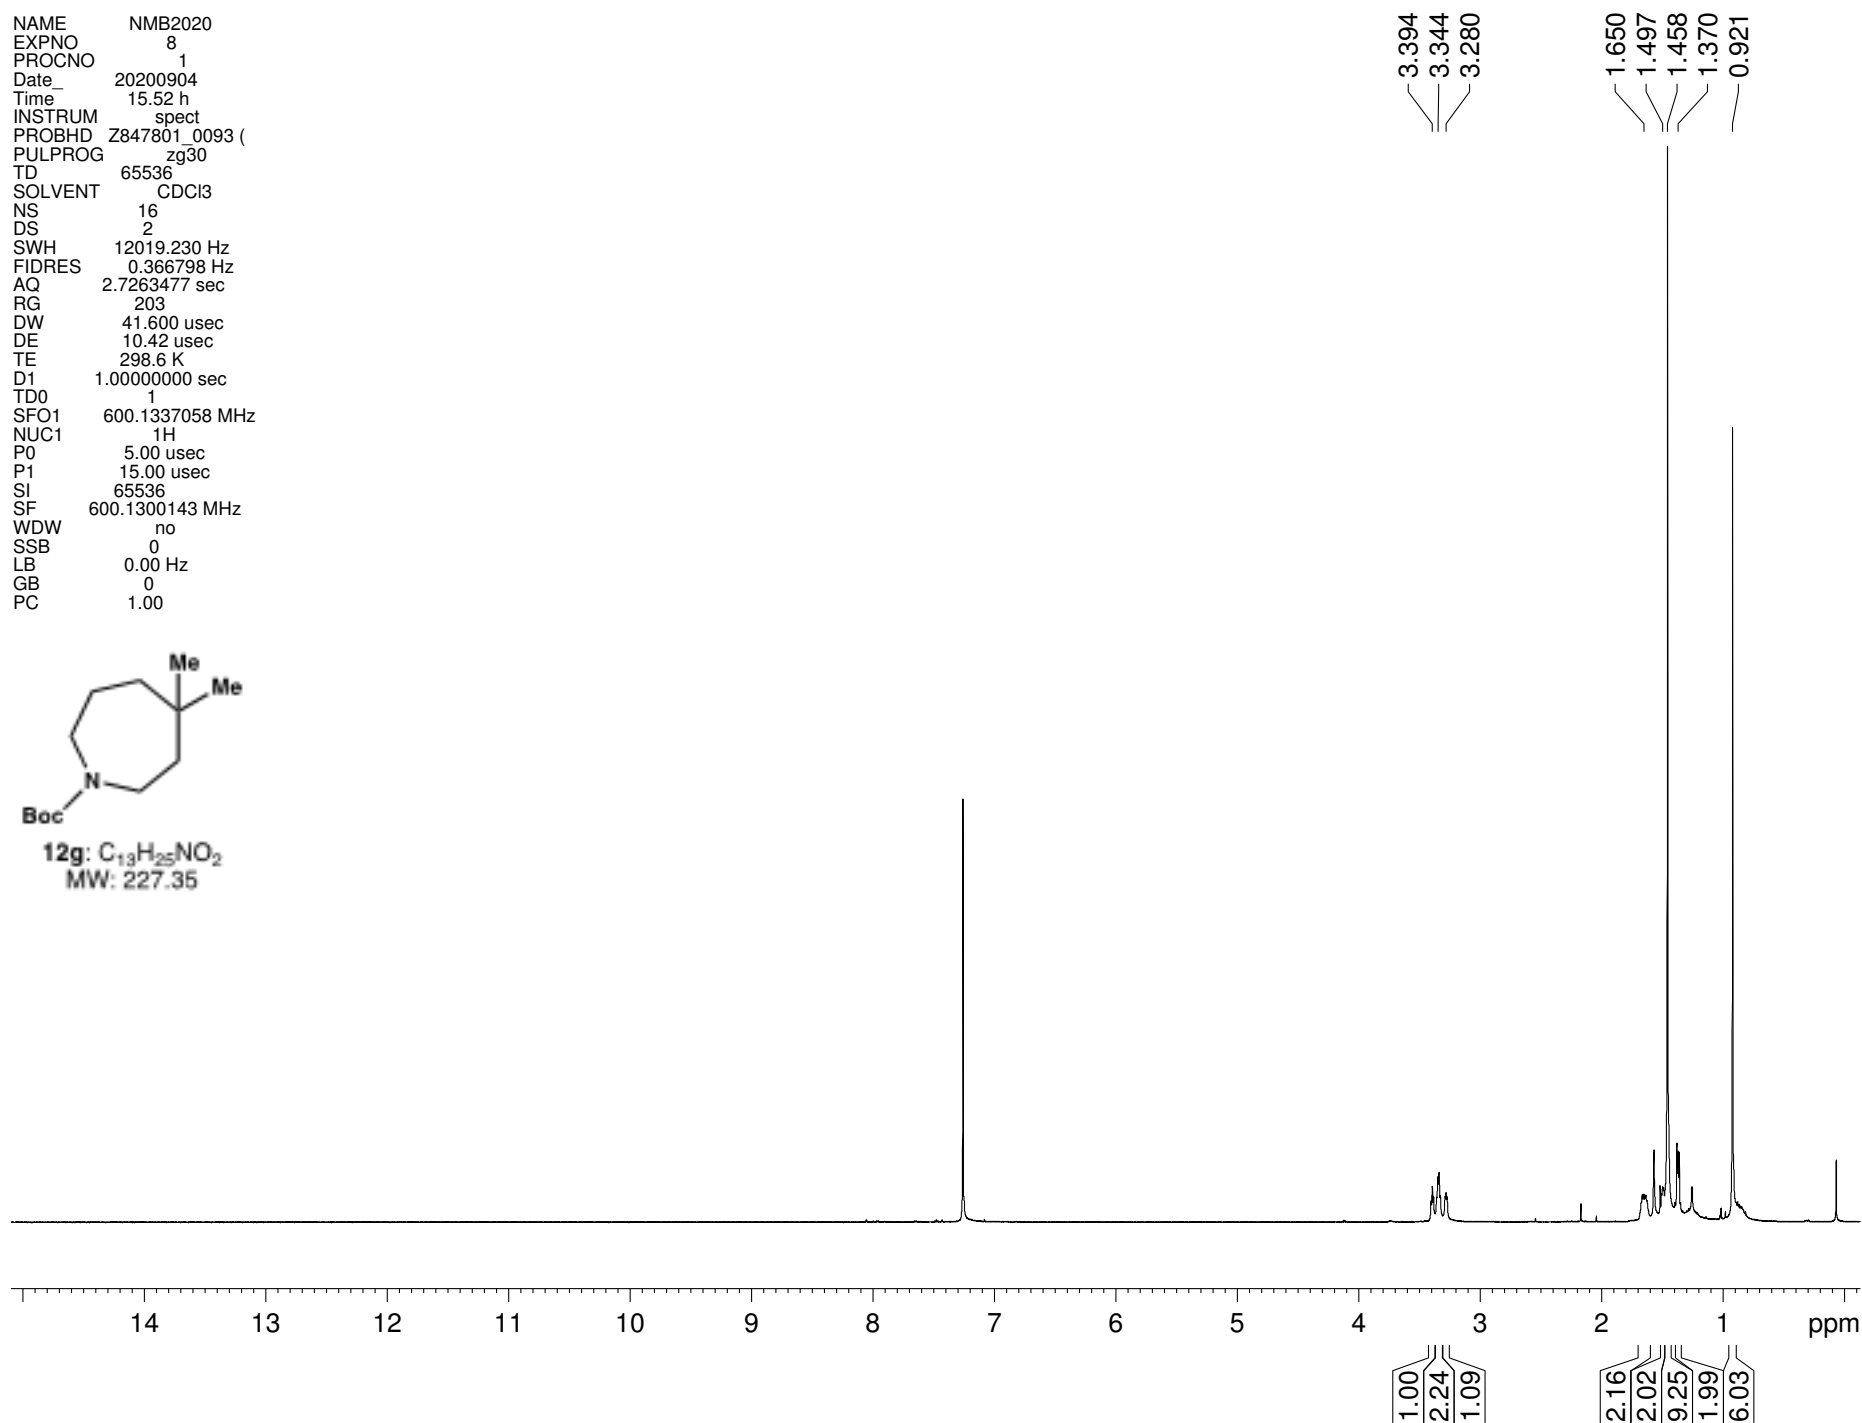

NAME NMB2020 13C  
EXPNO 6  
PROCNO 1  
Date\_ 20200826  
Time 21.59 h  
INSTRUM spect  
PROBHD Z108618\_0106 (  
PULPROG zgpg30  
TD 65536  
SOLVENT CDCl3  
NS 40  
DS 4  
SWH 24038.461 Hz  
FIDRES 0.733596 Hz  
AQ 1.3631988 sec  
RG 203  
DW 20.800 usec  
DE 6.50 usec  
TE 298.0 K  
D1 2.00000000 sec  
D11 0.03000000 sec  
TD0 1  
SFO1 100.6328888 MHz  
NUC1 13C  
P0 3.53 usec  
P1 10.60 usec  
SI 32768  
SF 100.6228280 MHz  
WDW EM  
SSB 0  
LB 1.00 Hz  
GB 0  
PC 1.40

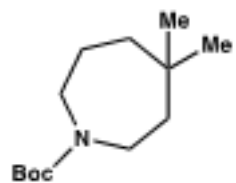

12g: C<sub>13</sub>H<sub>25</sub>NO<sub>2</sub>  
MW: 227.35

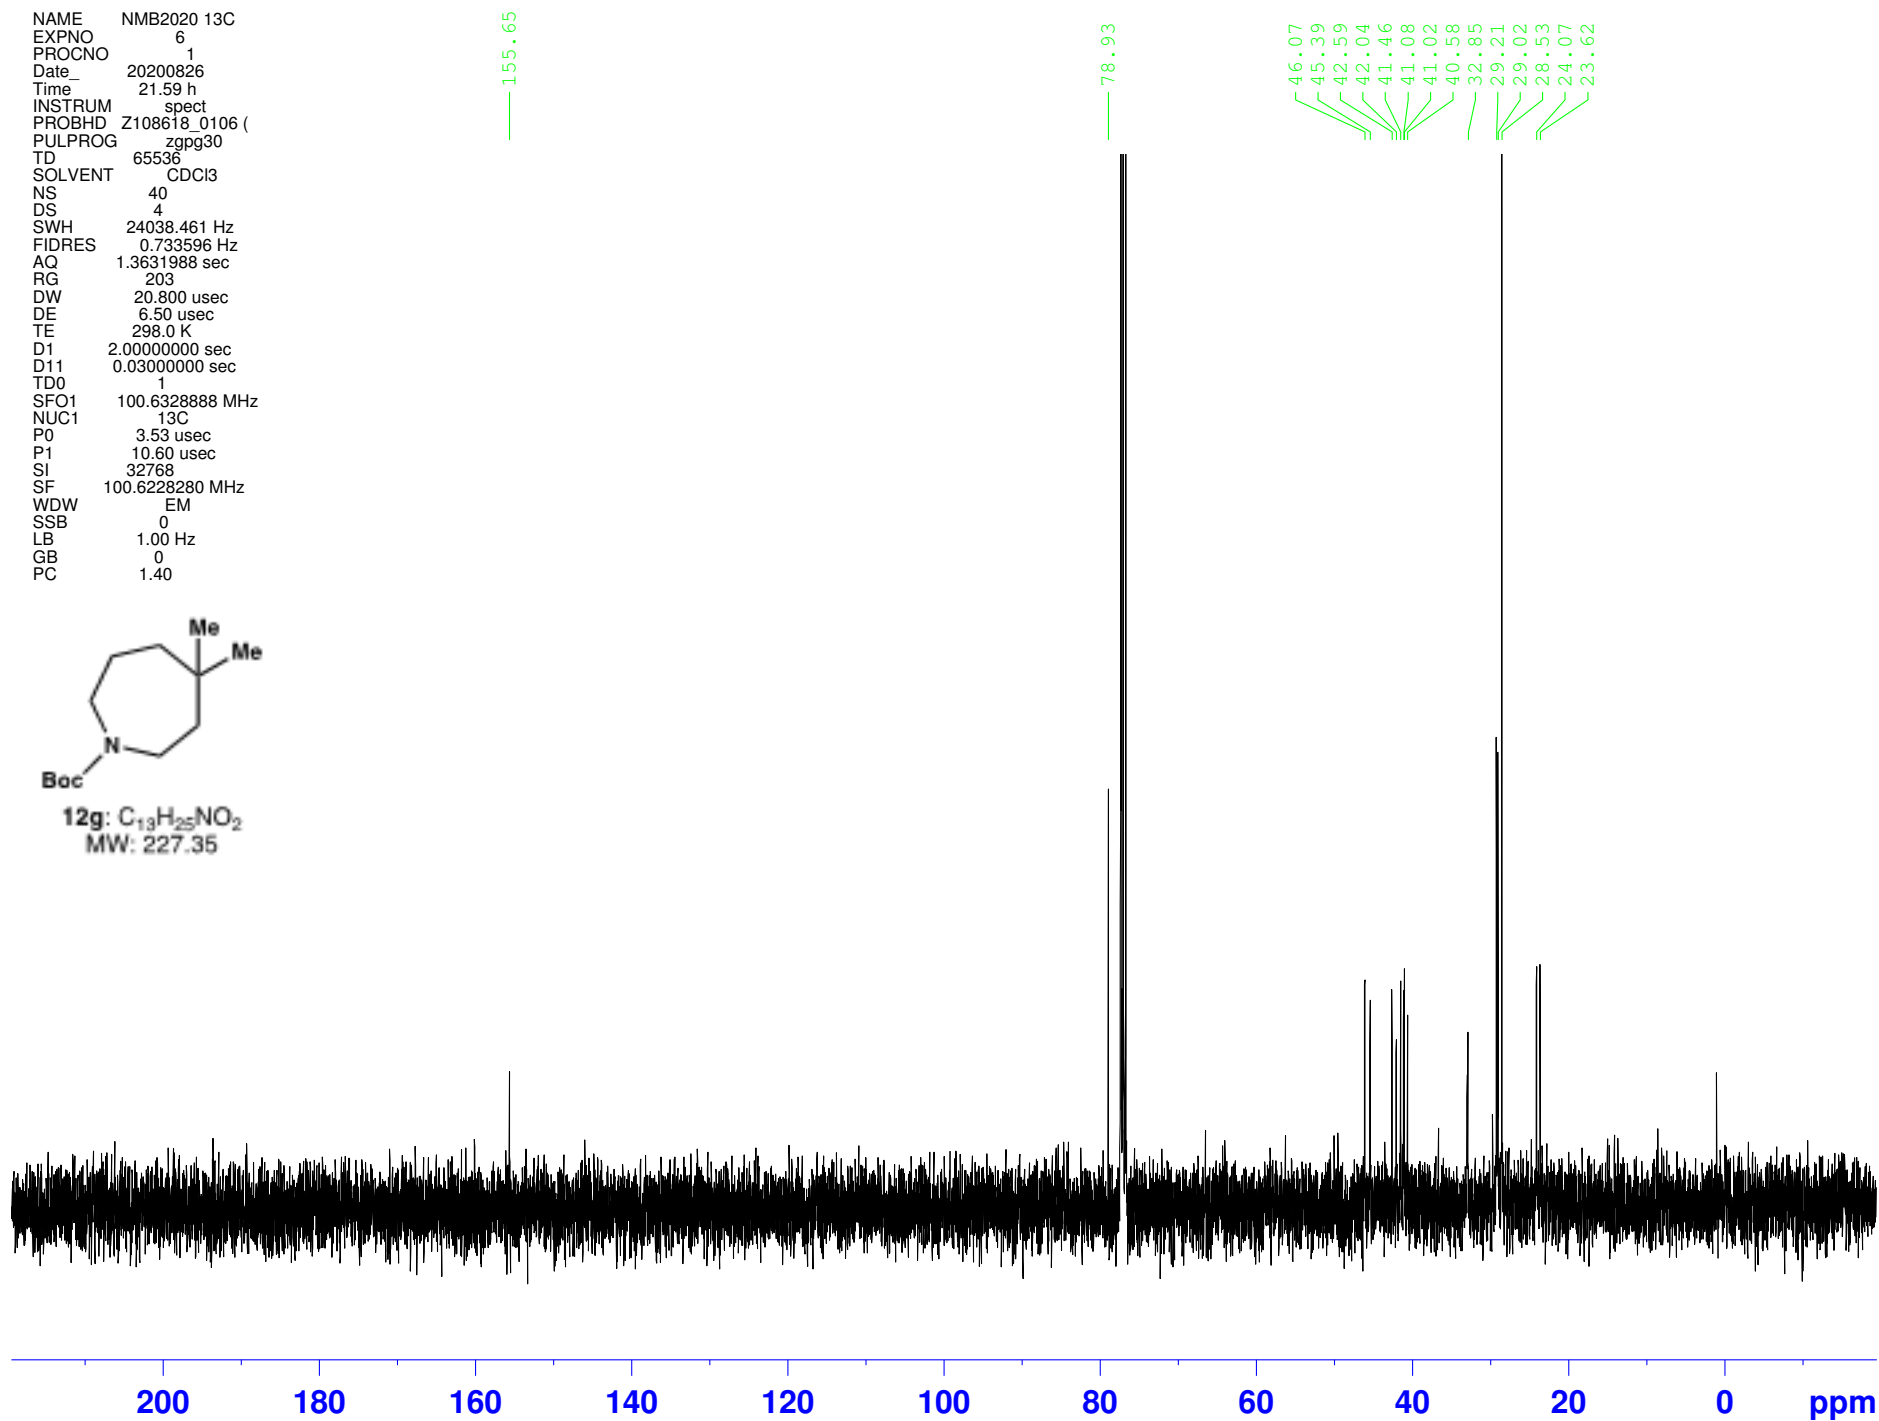

NAME NMB2151 1H  
 EXPNO 1  
 PROCNO 1  
 Date\_ 20210112  
 Time 17.23 h  
 INSTRUM spect  
 PROBHD Z108618\_0106 (  
 PULPROG zg30  
 TD 65536  
 SOLVENT CDCl3  
 NS 16  
 DS 2  
 SWH 8012.820 Hz  
 FIDRES 0.244532 Hz  
 AQ 4.0894966 sec  
 RG 203  
 DW 62.400 usec  
 DE 16.92 usec  
 TE 298.1 K  
 D1 1.00000000 sec  
 TD0 1  
 SFO1 400.1724710 MHz  
 NUC1 1H  
 P0 5.00 usec  
 P1 15.00 usec  
 SI 65536  
 SF 400.1700109 MHz  
 WDW no  
 SSB 0  
 LB 0.00 Hz  
 GB 0  
 PC 1.00

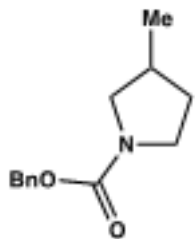

12h: C<sub>13</sub>H<sub>17</sub>NO<sub>2</sub>  
 MW: 219.28

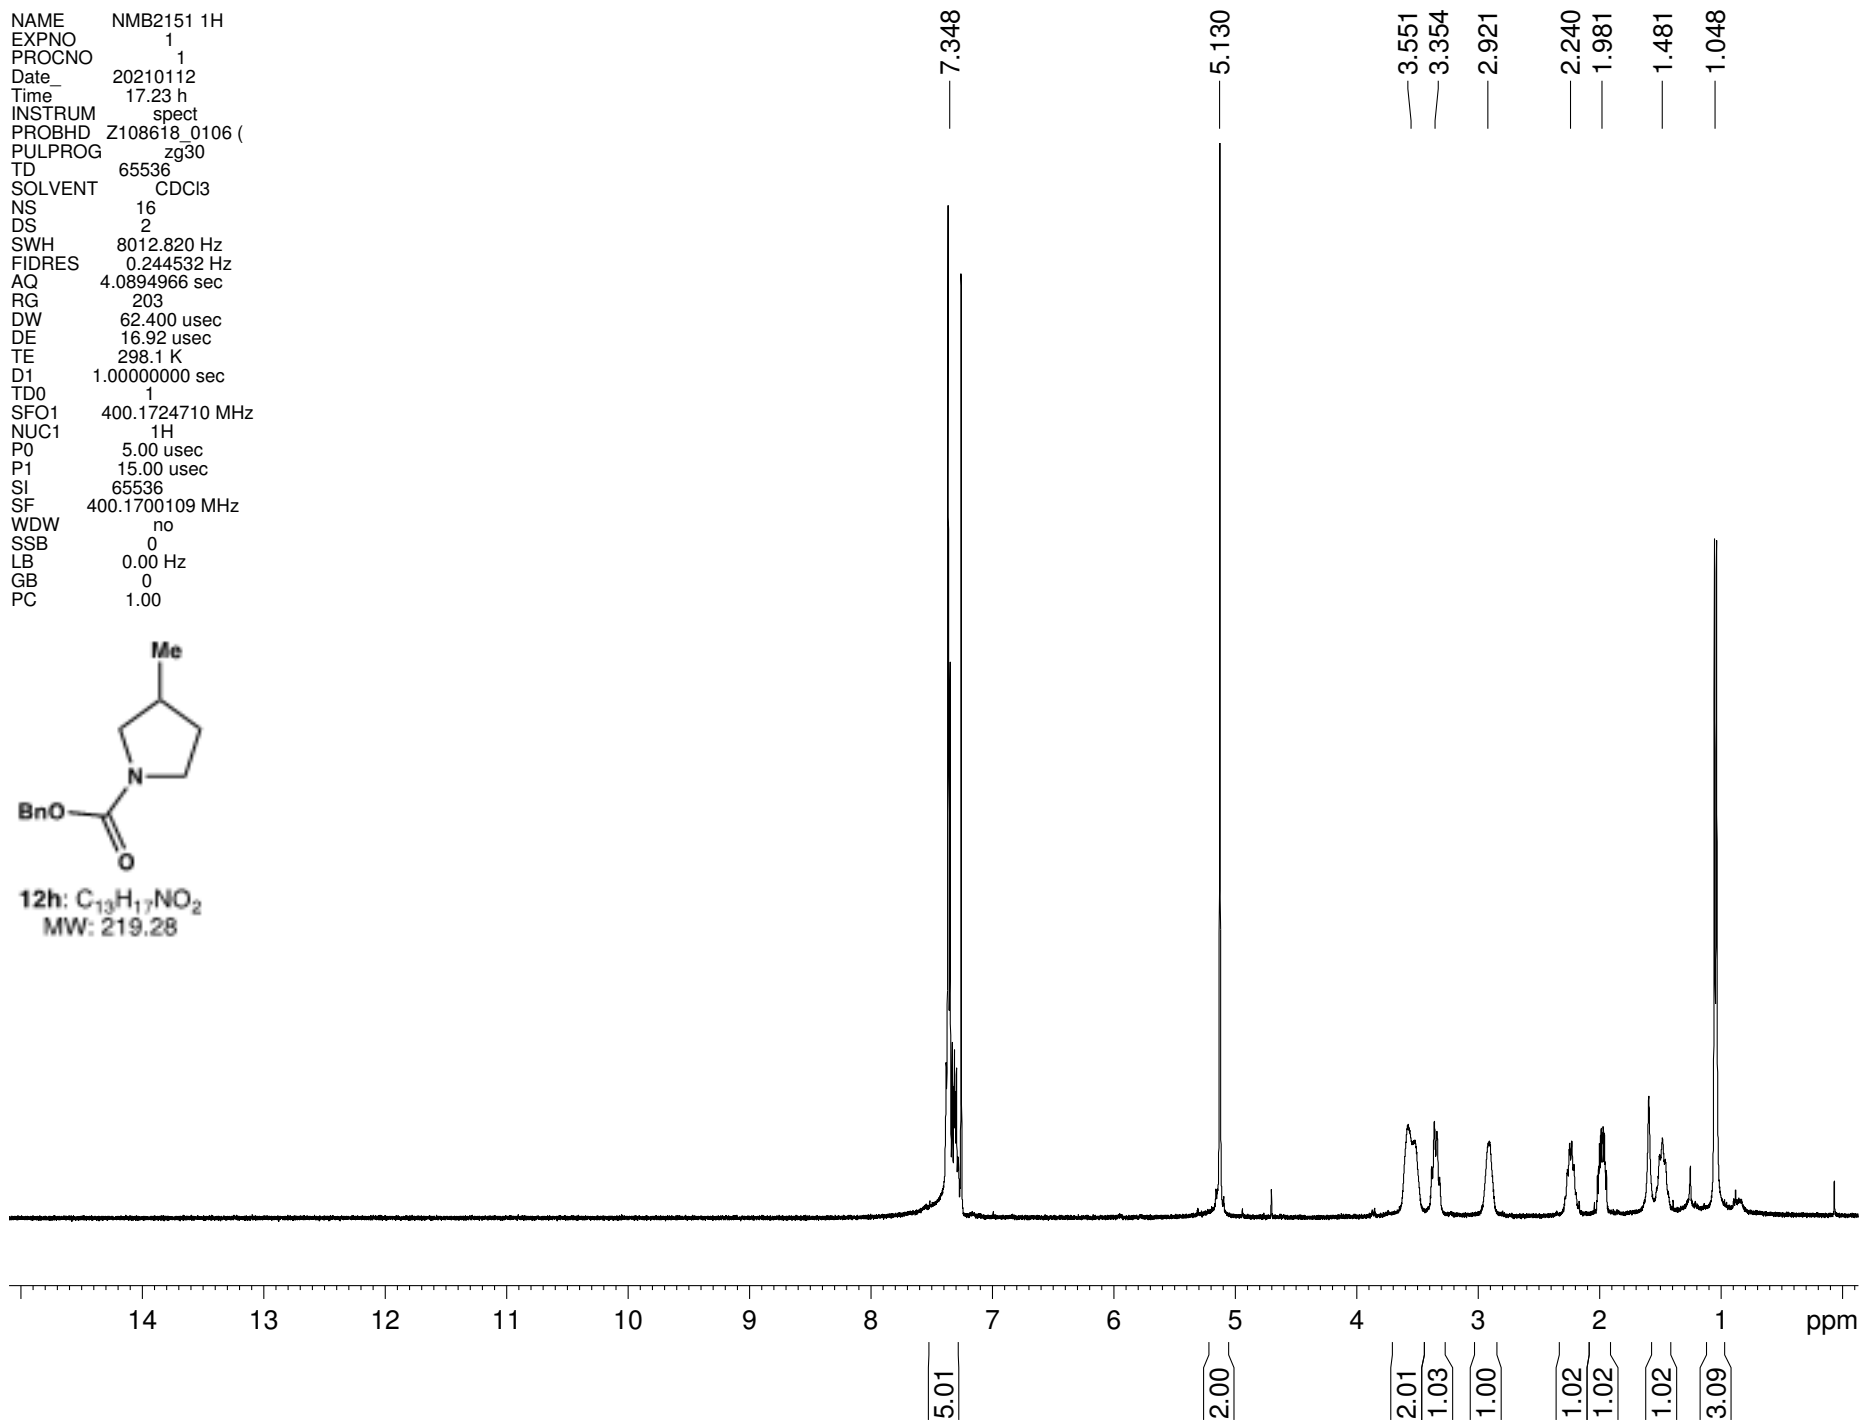



NAME JAL10062B-Ai 1H  
 EXPNO 2  
 PROCNO 1  
 Date\_ 20210217  
 Time 15.51 h  
 INSTRUM spect  
 PROBHD Z108618\_0106 (  
 PULPROG zg30  
 TD 65536  
 SOLVENT CDCl3  
 NS 16  
 DS 2  
 SWH 8012.820 Hz  
 FIDRES 0.244532 Hz  
 AQ 4.0894966 sec  
 RG 203  
 DW 62.400 usec  
 DE 16.92 usec  
 TE 297.6 K  
 D1 1.00000000 sec  
 TD0 1  
 SFO1 400.1724710 MHz  
 NUC1 1H  
 P0 5.00 usec  
 P1 15.00 usec  
 SI 65536  
 SF 400.1700112 MHz  
 WDW EM  
 SSB 0  
 LB 0.30 Hz  
 GB 0  
 PC 1.00

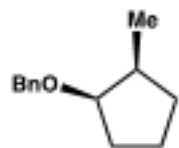

12i: C<sub>13</sub>H<sub>18</sub>O  
 MW: 190.29

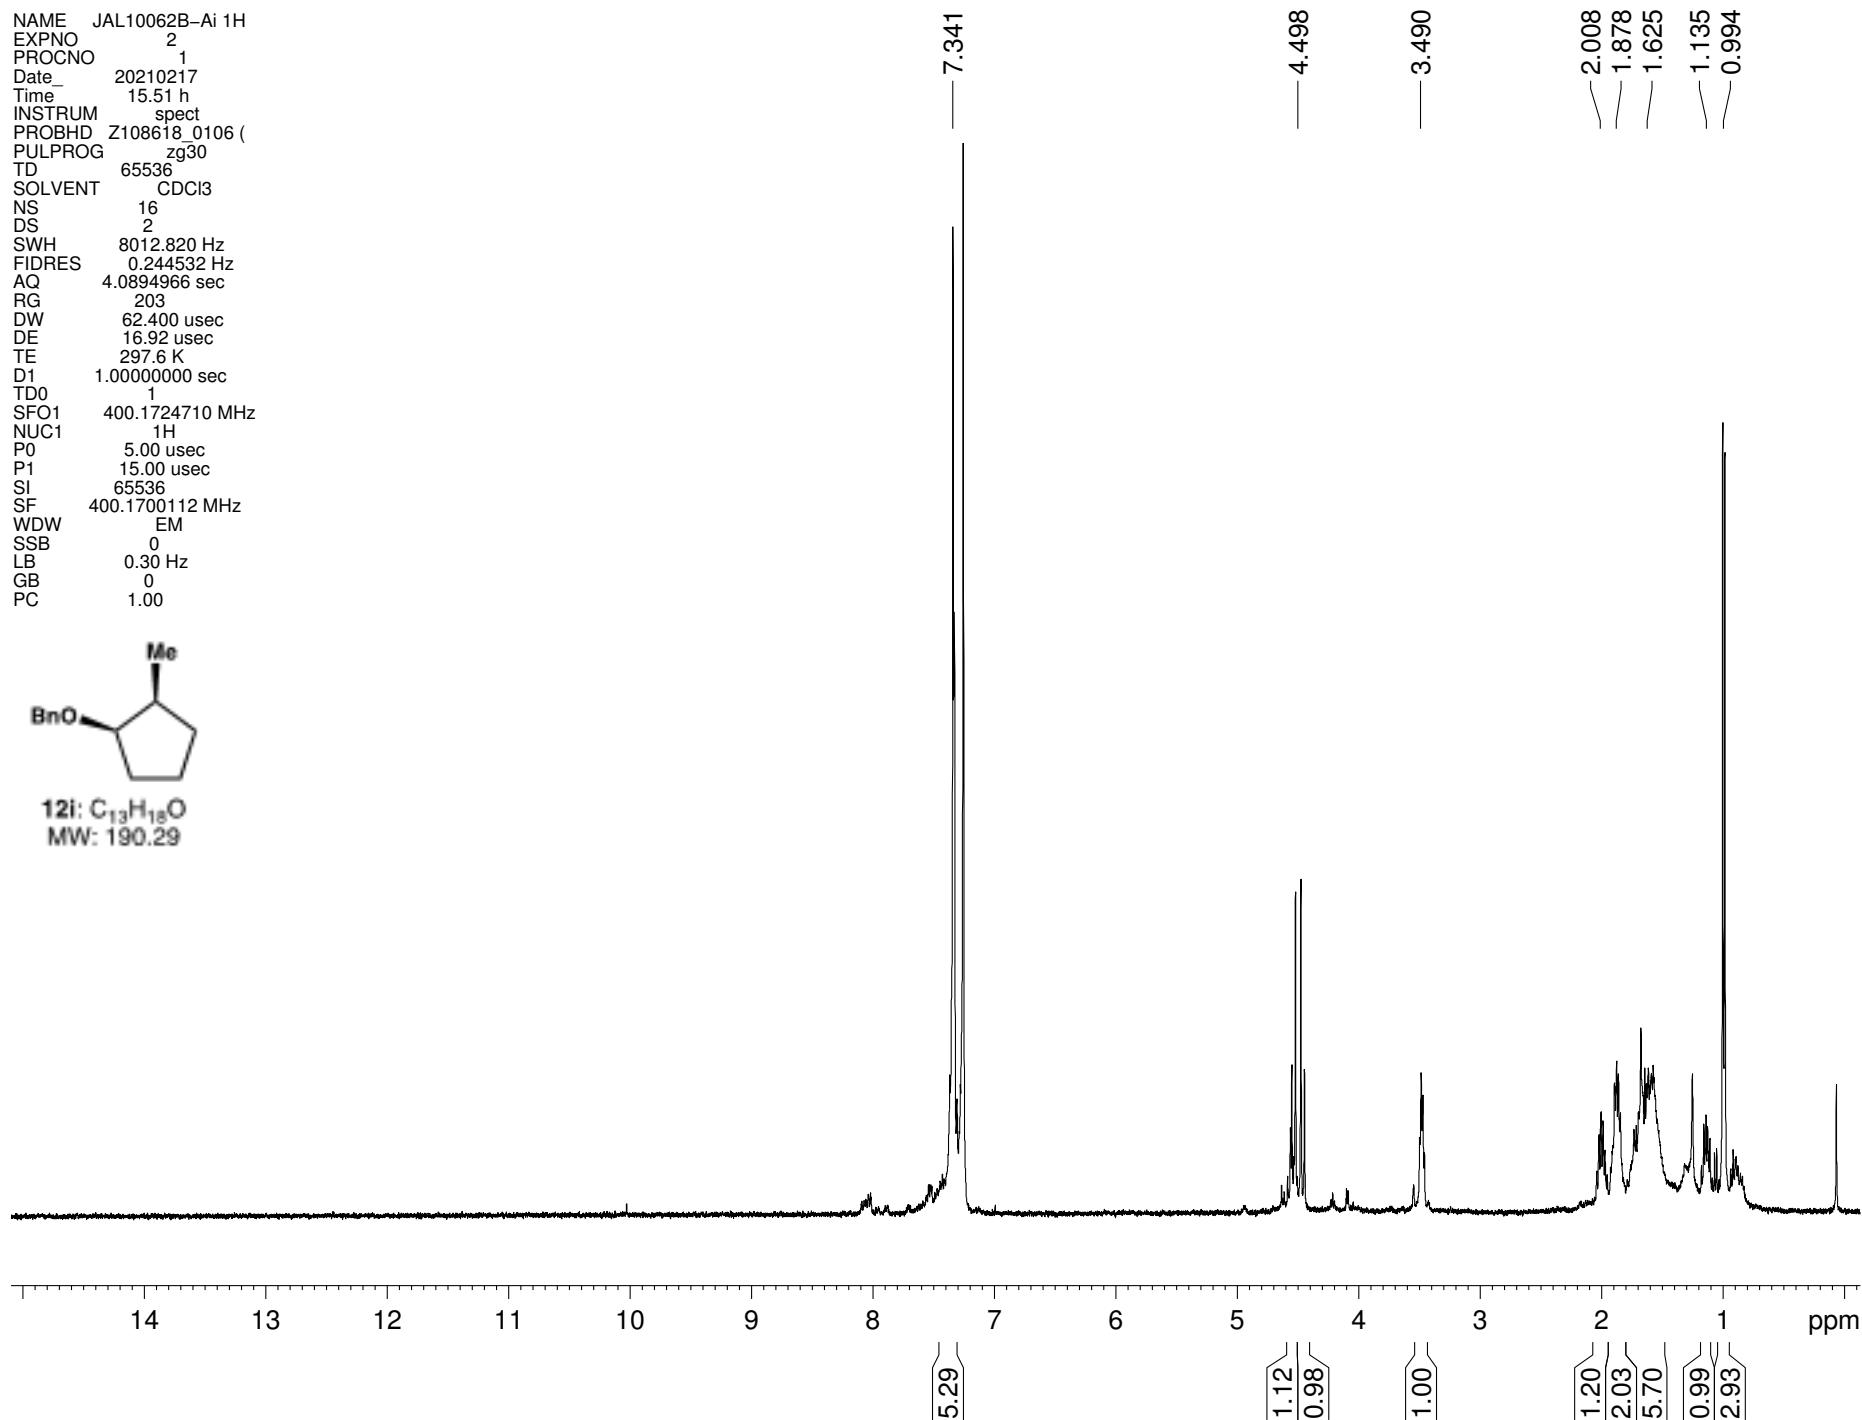

NAME JAL10158B-3 1H B600  
EXPNO 1  
PROCNO 1  
Date\_ 20210215  
Time 19.41 h  
INSTRUM spect  
PROBHD Z108618\_0106 (  
PULPROG zg30  
TD 65536  
SOLVENT CDCl3  
NS 16  
DS 2  
SWH 8012.820 Hz  
FIDRES 0.244532 Hz  
AQ 4.0894966 sec  
RG 203  
DW 62.400 usec  
DE 16.92 usec  
TE 298.0 K  
D1 1.00000000 sec  
TD0 1  
SFO1 400.1724710 MHz  
NUC1 1H  
P0 5.00 usec  
P1 15.00 usec  
SI 65536  
SF 400.1700000 MHz  
WDW EM  
SSB 0  
LB 0.30 Hz  
GB 0  
PC 1.00

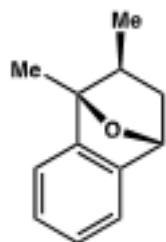

12j: C<sub>12</sub>H<sub>14</sub>O  
MW: 174.24

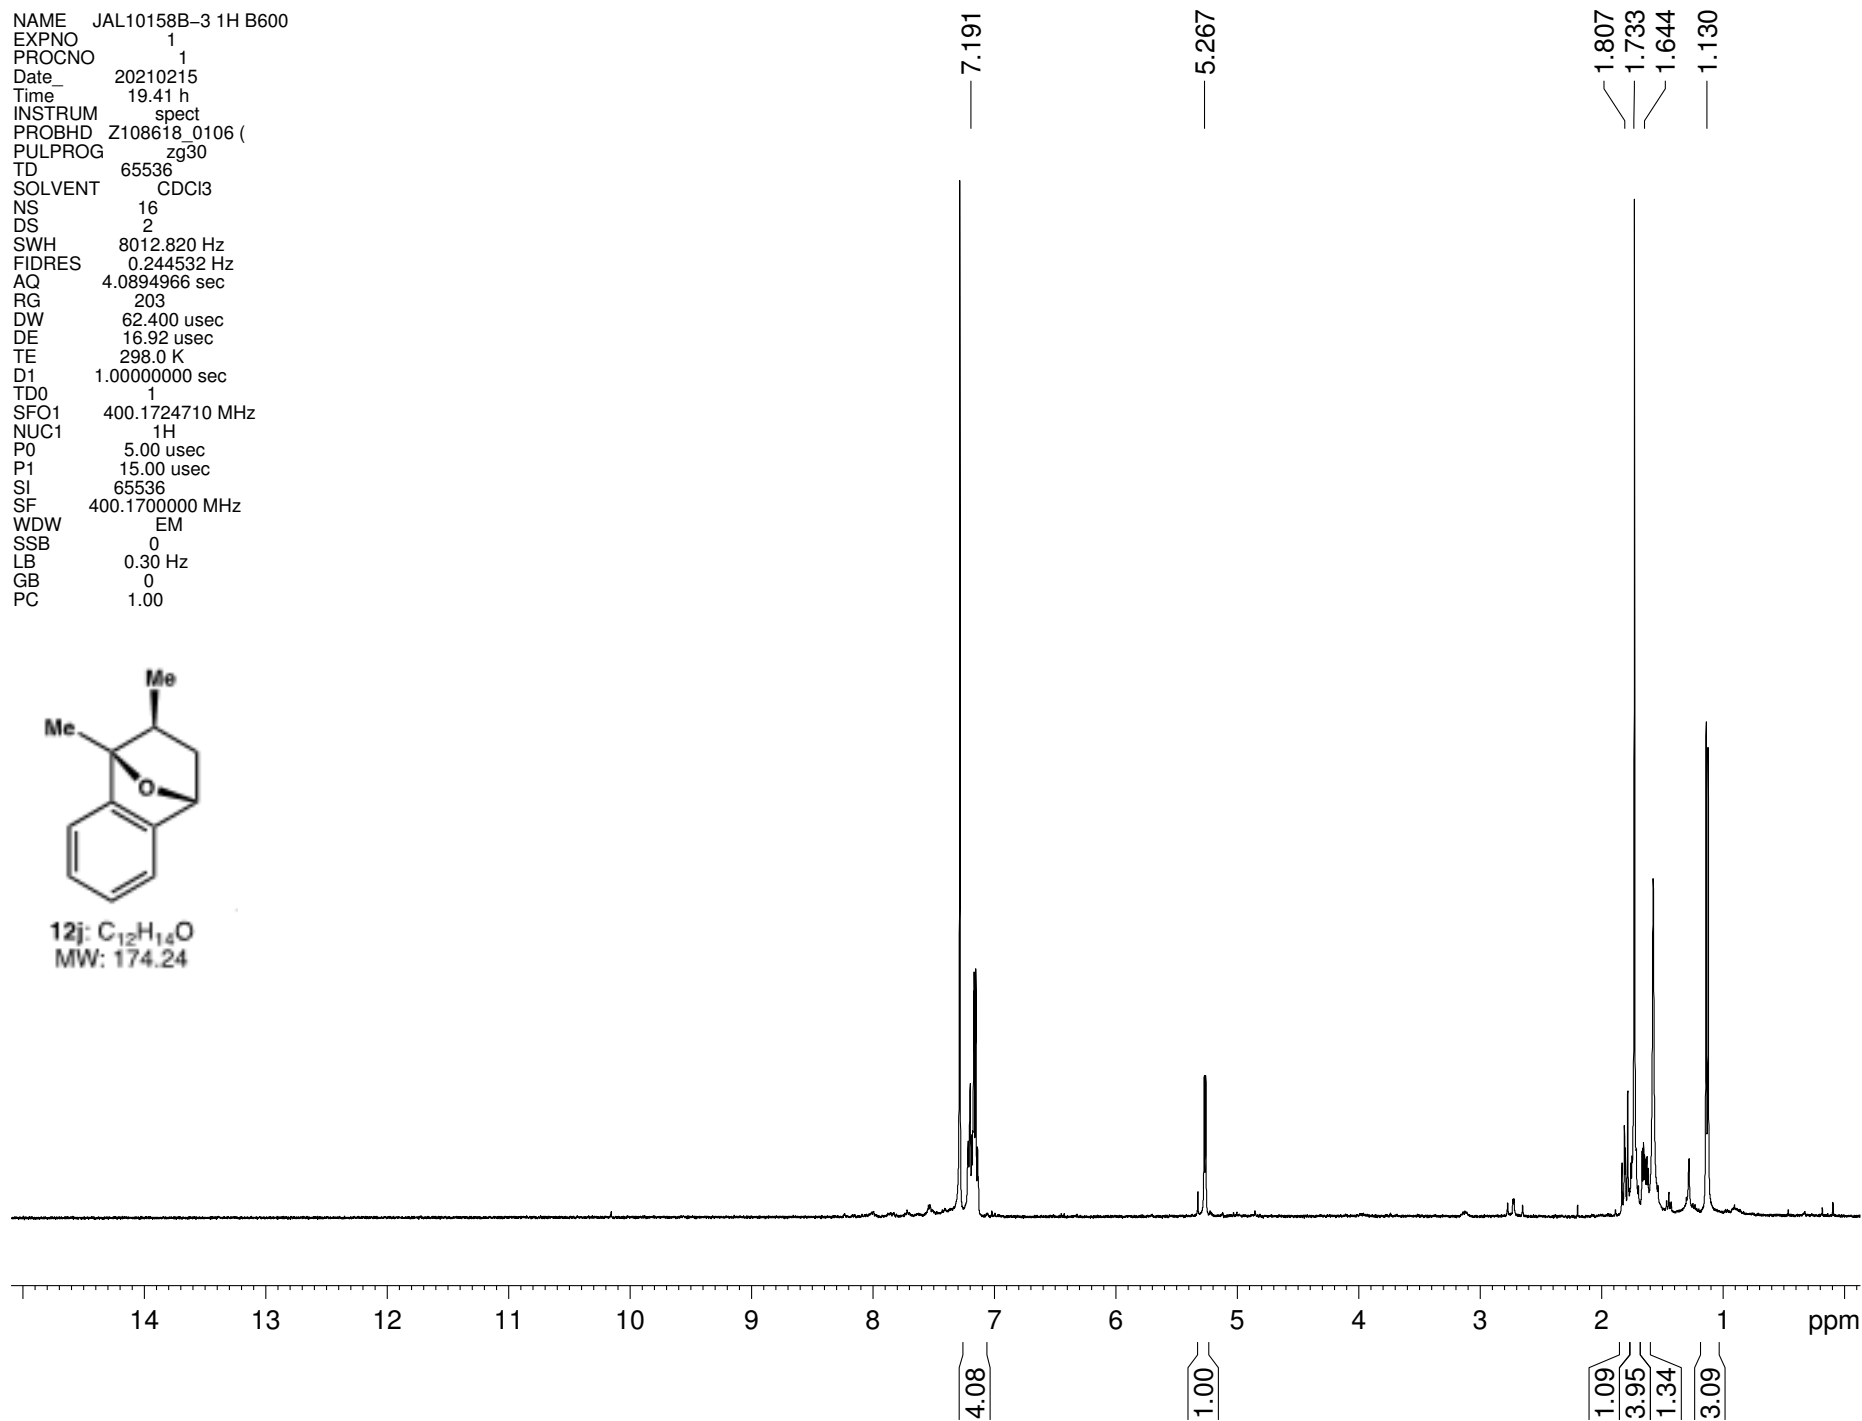

NAME JAL10158B' 13C B600  
EXPNO 1  
PROCNO 1  
Date\_ 20210216  
Time 9.53 h  
INSTRUM spect  
PROBHD Z814601\_0054 (  
PULPROG zgpg30  
TD 65536  
SOLVENT CDCl3  
NS 16413  
DS 4  
SWH 36231.883 Hz  
FIDRES 1.105709 Hz  
AQ 0.9044468 sec  
RG 203  
DW 13.800 usec  
DE 6.50 usec  
TE 298.2 K  
D1 2.00000000 sec  
D11 0.03000000 sec  
TD0 1  
SFO1 150.9178988 MHz  
NUC1 13C  
P0 3.33 usec  
P1 10.00 usec  
SI 32768  
SF 150.9028090 MHz  
WDW EM  
SSB 0  
LB 1.00 Hz  
GB 0  
PC 1.40

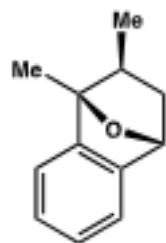

12j: C<sub>12</sub>H<sub>14</sub>O  
MW: 174.24

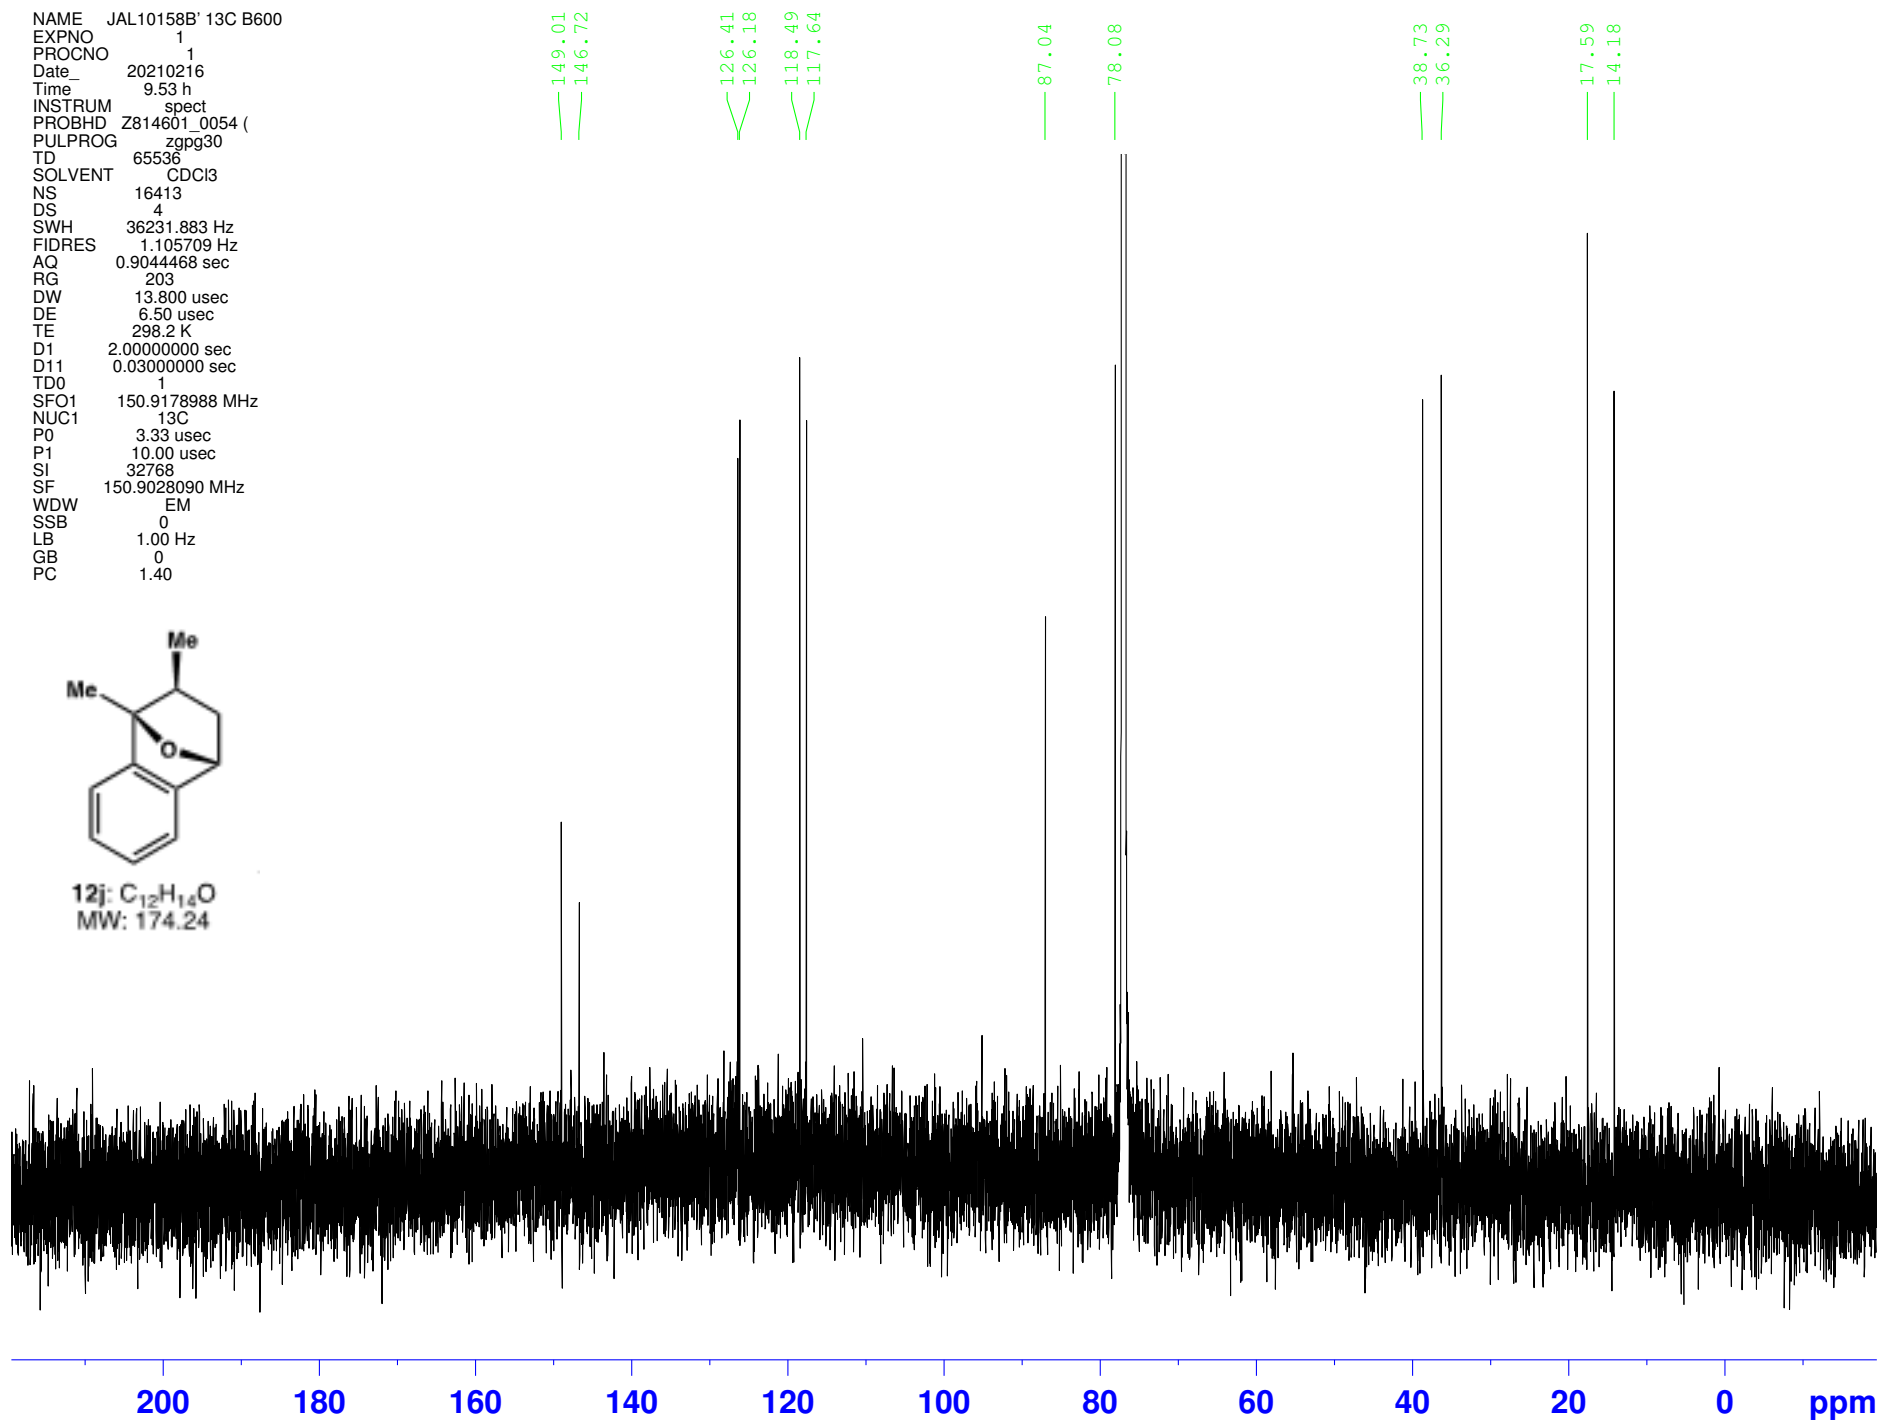

NAME JAL9321A 1H  
 EXPNO 1  
 PROCNO 1  
 Date\_ 20200914  
 Time 12.10 h  
 INSTRUM spect  
 PROBHD Z847801\_0093 (  
 PULPROG zg30  
 TD 65536  
 SOLVENT CDCl3  
 NS 8  
 DS 2  
 SWH 12019.230 Hz  
 FIDRES 0.366798 Hz  
 AQ 2.7263477 sec  
 RG 144  
 DW 41.600 usec  
 DE 10.42 usec  
 TE 298.5 K  
 D1 1.00000000 sec  
 TD0 1  
 SFO1 600.1337058 MHz  
 NUC1 1H  
 P0 5.00 usec  
 P1 15.00 usec  
 SI 65536  
 SF 600.1300141 MHz  
 WDW EM  
 SSB 0  
 LB 0.30 Hz  
 GB 0  
 PC 1.00

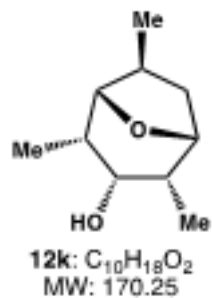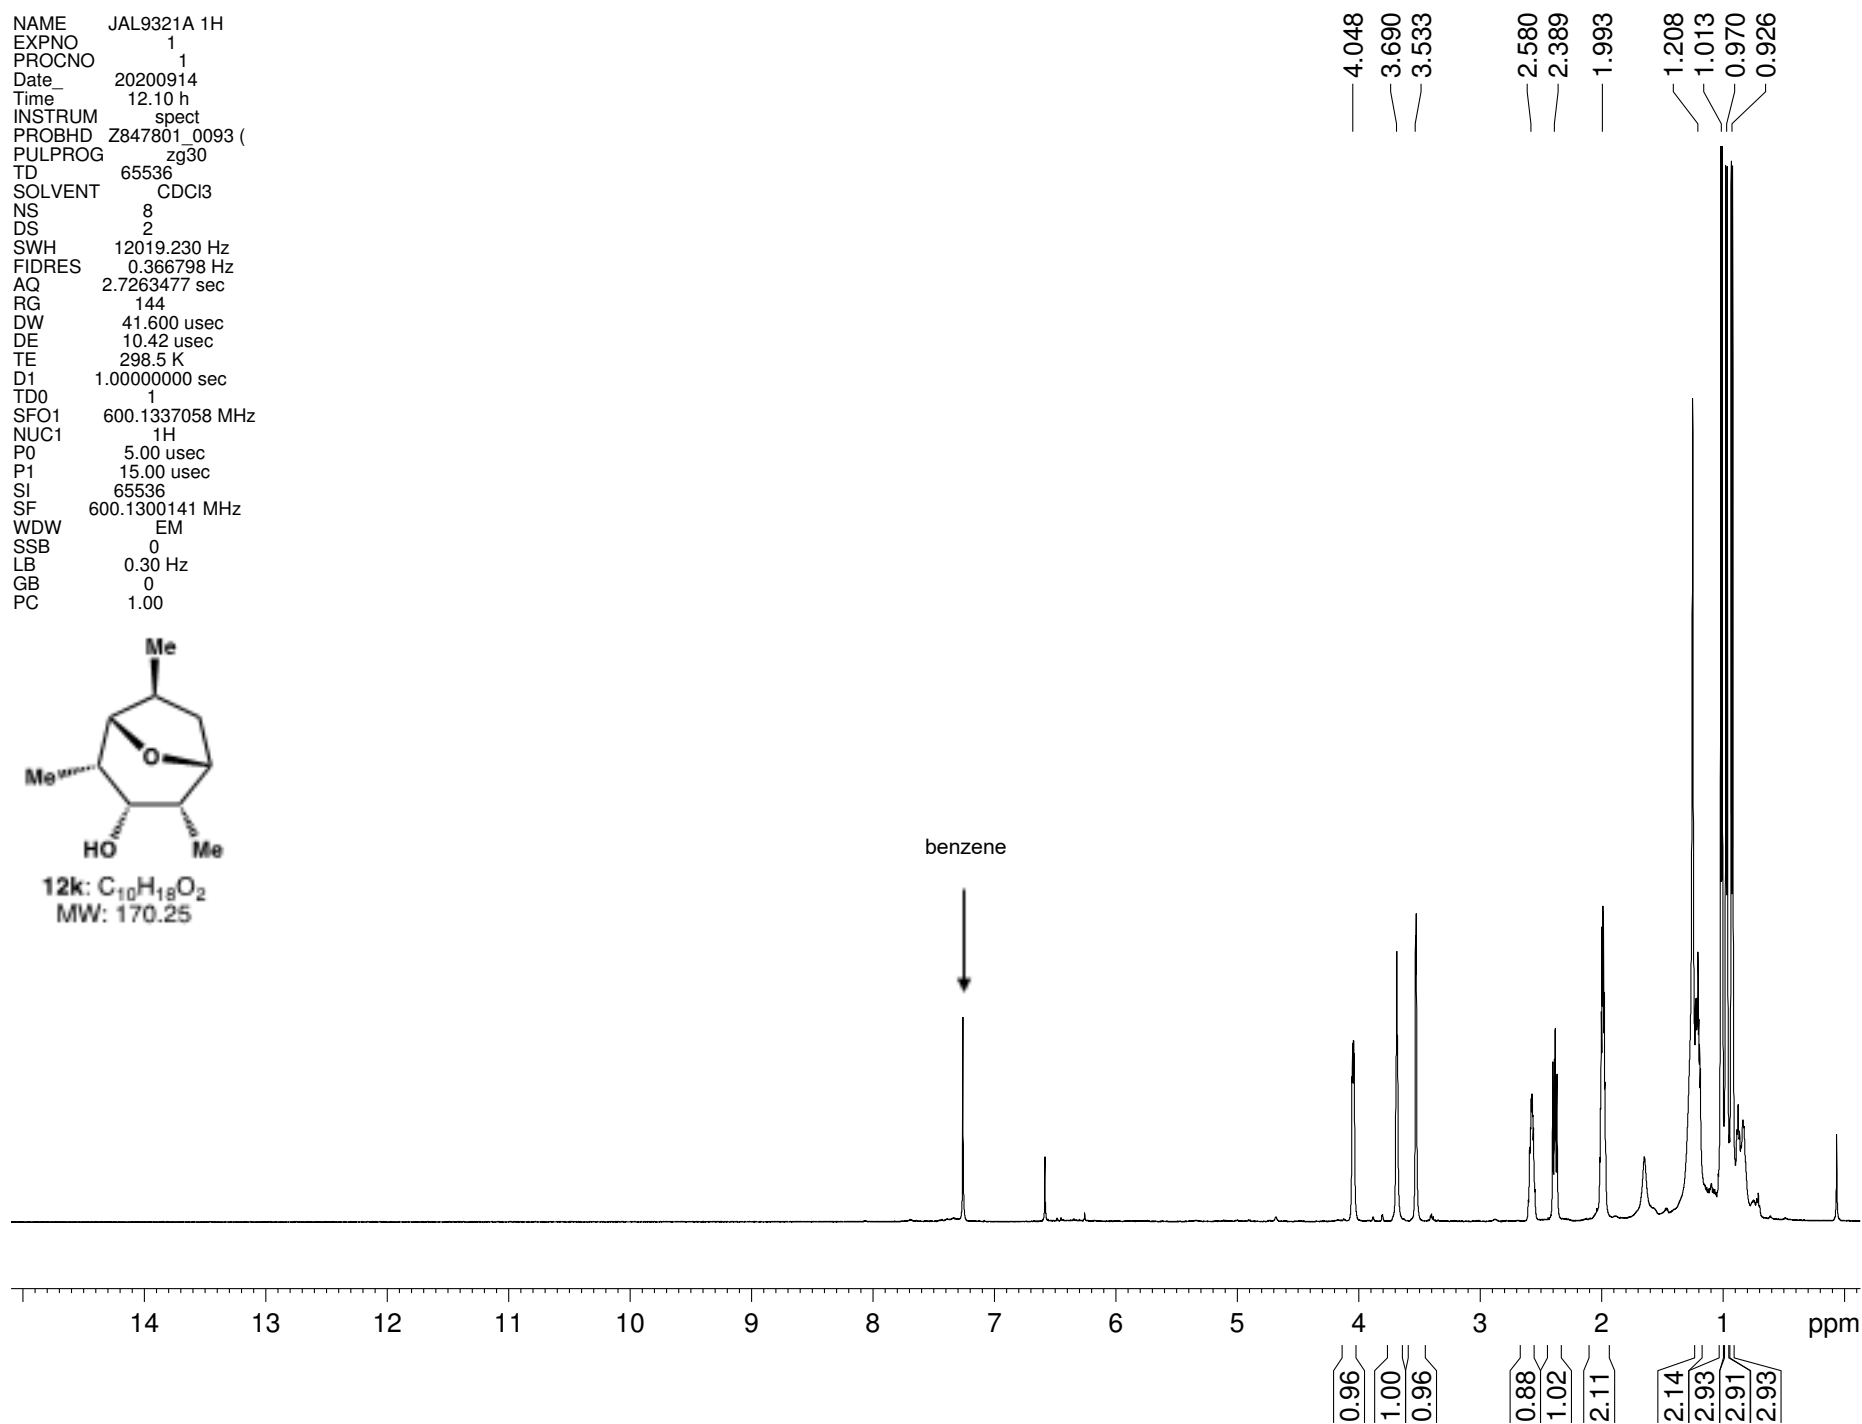

NAME JAL9321A 13C  
EXPNO 1  
PROCNO 1  
Date\_ 20200914  
Time\_ 12.24 h  
INSTRUM spect  
PROBHD Z847801\_0093 (  
PULPROG zgpg30  
TD 65536  
SOLVENT CDCl3  
NS 250  
DS 4  
SWH 36231.883 Hz  
FIDRES 1.105709 Hz  
AQ 0.9044468 sec  
RG 203  
DW 13.800 usec  
DE 6.50 usec  
TE 299.8 K  
D1 2.00000000 sec  
D11 0.03000000 sec  
TD0 1  
SFO1 150.9178988 MHz  
NUC1 13C  
P0 3.33 usec  
P1 10.00 usec  
SI 32768  
SF 150.9028090 MHz  
WDW EM  
SSB 0  
LB 1.00 Hz  
GB 0  
PC 1.40

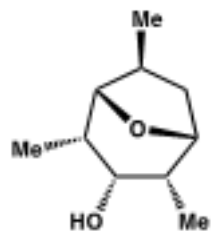

12k: C<sub>10</sub>H<sub>18</sub>O<sub>2</sub>  
MW: 170.25

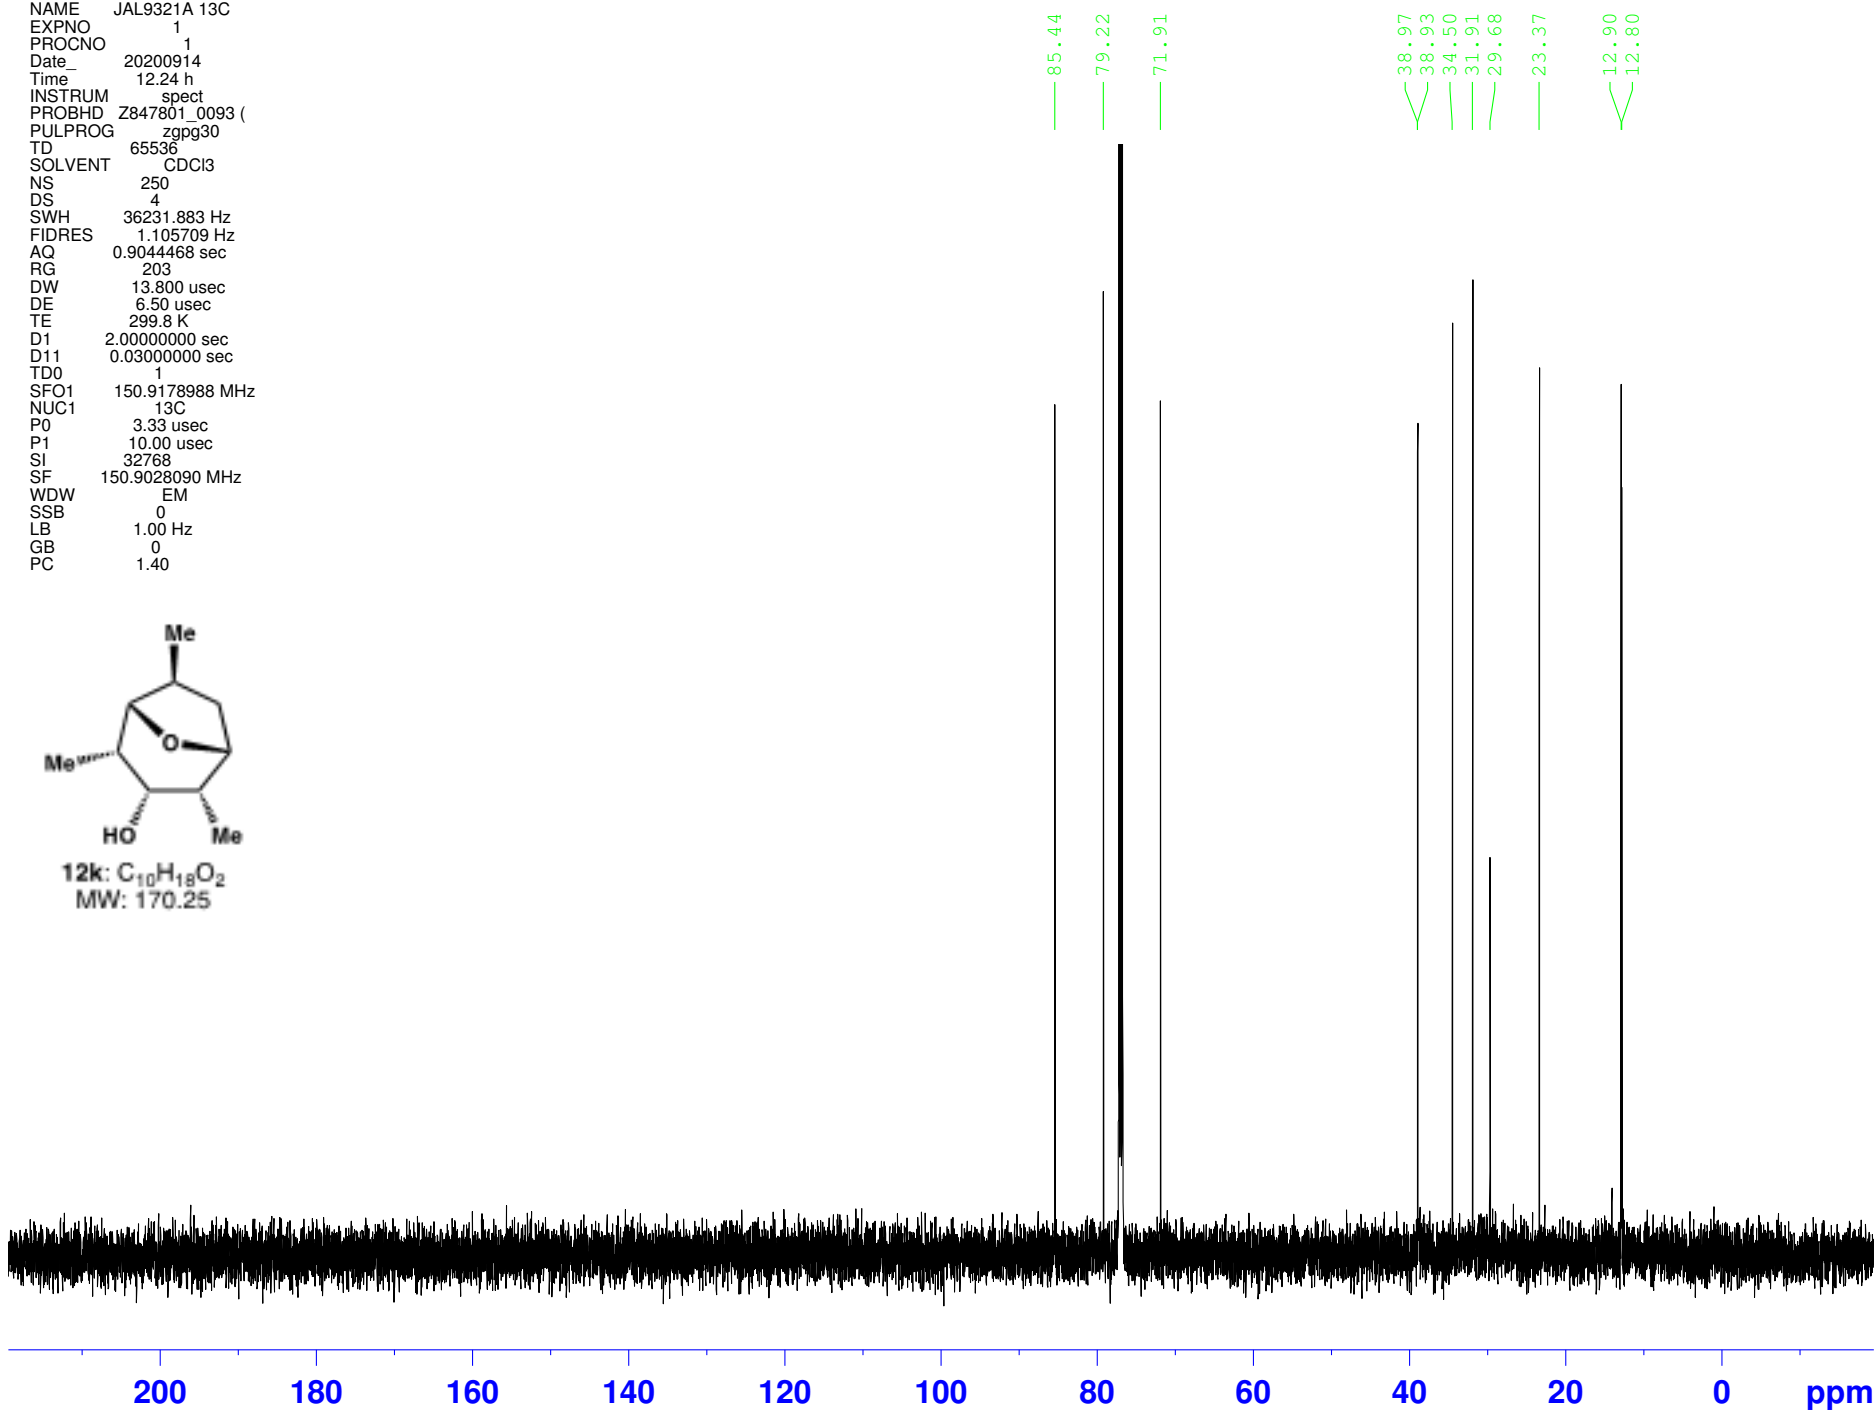

NAME NMB2167 A  
EXPNO 1  
PROCNO 1  
Date\_ 20210201  
Time 22.21 h  
INSTRUM spect  
PROBHD Z108618\_0106 (  
PULPROG zg30  
TD 65536  
SOLVENT CDCl3  
NS 16  
DS 2  
SWH 8012.820 Hz  
FIDRES 0.244532 Hz  
AQ 4.0894966 sec  
RG 203  
DW 62.400 usec  
DE 16.92 usec  
TE 297.6 K  
D1 1.00000000 sec  
TD0 1  
SFO1 400.1724710 MHz  
NUC1 1H  
P0 5.00 usec  
P1 15.00 usec  
SI 65536  
SF 400.1700102 MHz  
WDW no  
SSB 0  
LB 0.00 Hz  
GB 0  
PC 1.00

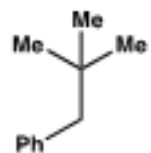

12l: C<sub>11</sub>H<sub>16</sub>  
MW: 148.25

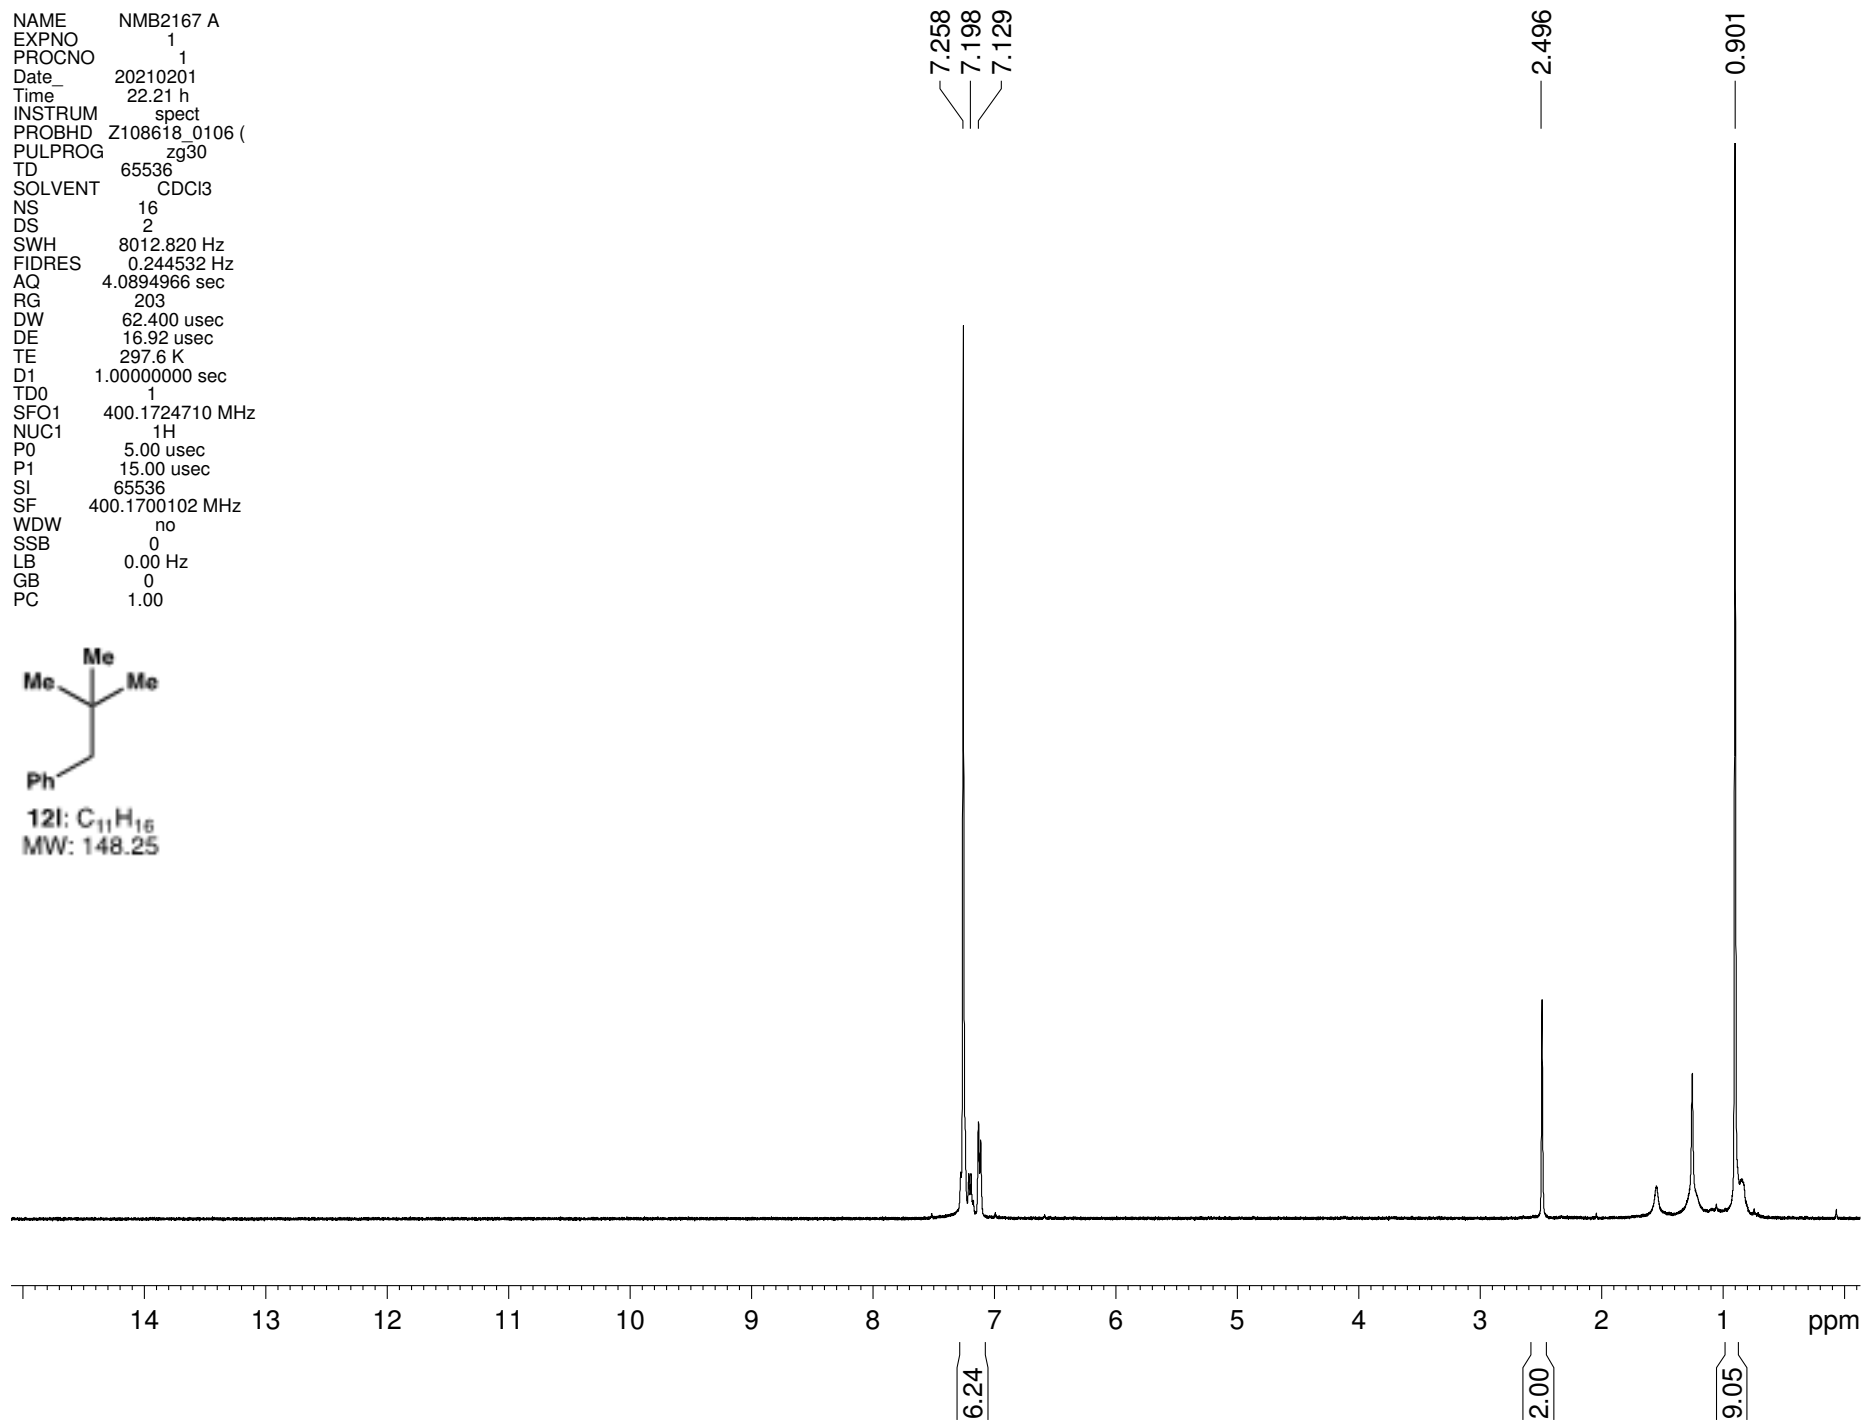

NAME NMB2098 A  
EXPNO 1  
PROCNO 1  
Date\_ 20201104  
Time 22.13 h  
INSTRUM spect  
PROBHD Z108618\_0106 (  
PULPROG zg30  
TD 65536  
SOLVENT CDCl3  
NS 16  
DS 2  
SWH 8012.820 Hz  
FIDRES 0.244532 Hz  
AQ 4.0894966 sec  
RG 203  
DW 62.400 usec  
DE 16.92 usec  
TE 297.3 K  
D1 1.00000000 sec  
TD0 1  
SFO1 400.1724710 MHz  
NUC1 1H  
P0 5.00 usec  
P1 15.00 usec  
SI 65536  
SF 400.1700000 MHz  
WDW no  
SSB 0  
LB 0.00 Hz  
GB 0  
PC 1.00

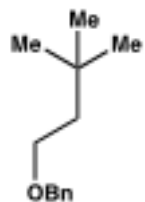

12m: C<sub>13</sub>H<sub>20</sub>O  
MW: 192.30

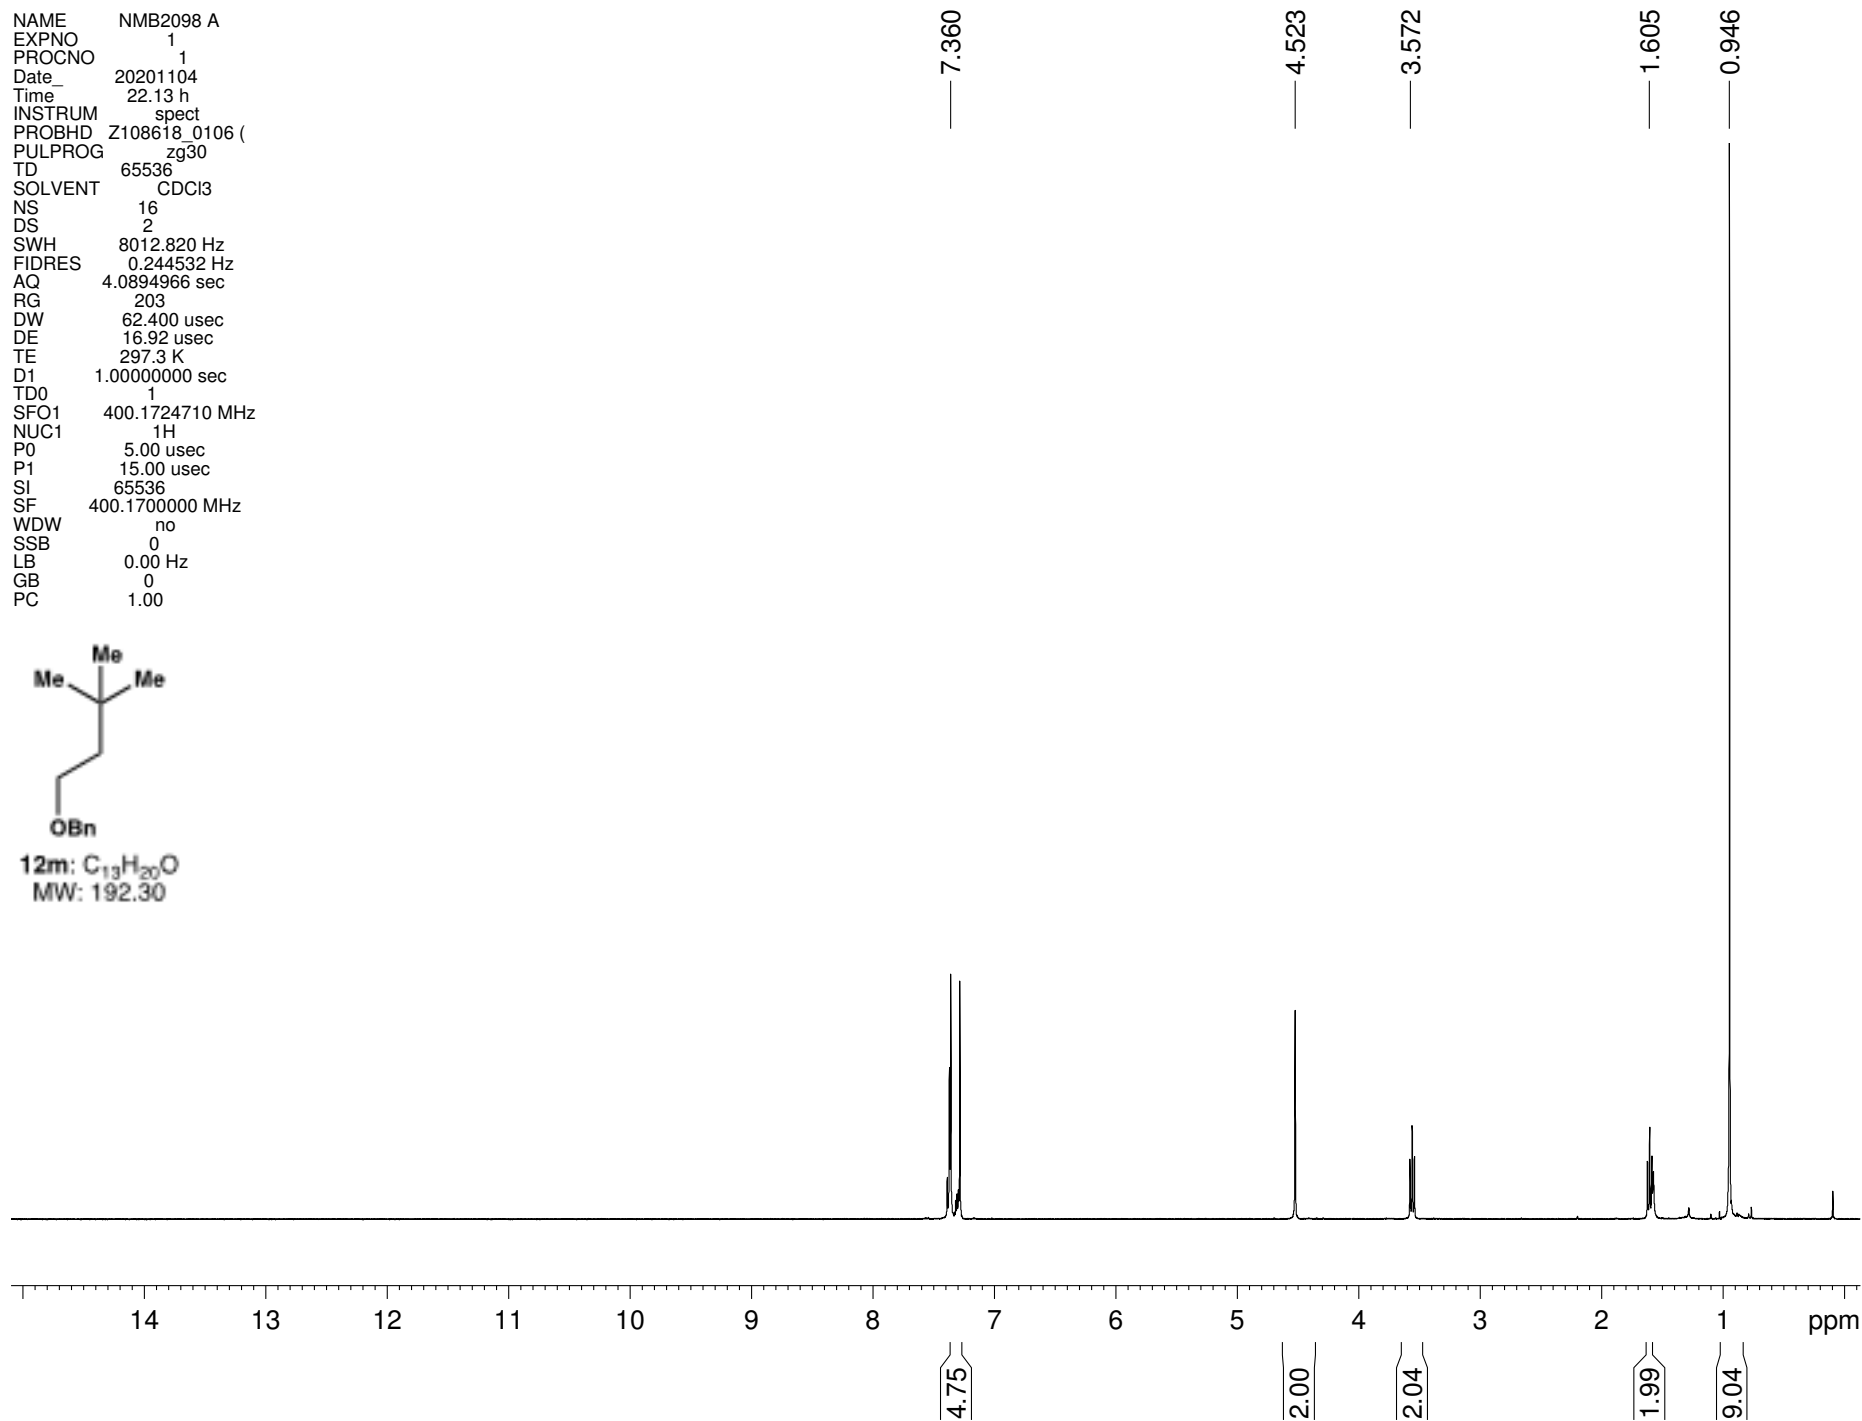

NAME JAL10027B 1H  
EXPNO 1  
PROCNO 1  
Date\_ 20201214  
Time 17.27 h  
INSTRUM spect  
PROBHD Z108618\_0106 (  
PULPROG zg30  
TD 65536  
SOLVENT CDCl3  
NS 16  
DS 2  
SWH 8012.820 Hz  
FIDRES 0.244532 Hz  
AQ 4.0894966 sec  
RG 181  
DW 62.400 usec  
DE 16.92 usec  
TE 297.7 K  
D1 1.00000000 sec  
TD0 1  
SFO1 400.1724710 MHz  
NUC1 1H  
P0 5.00 usec  
P1 15.00 usec  
SI 65536  
SF 400.1700000 MHz  
WDW EM  
SSB 0  
LB 0.30 Hz  
GB 0  
PC 1.00

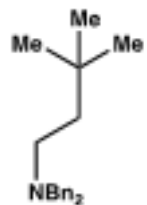

12n: C<sub>20</sub>H<sub>27</sub>N  
MW: 281.44

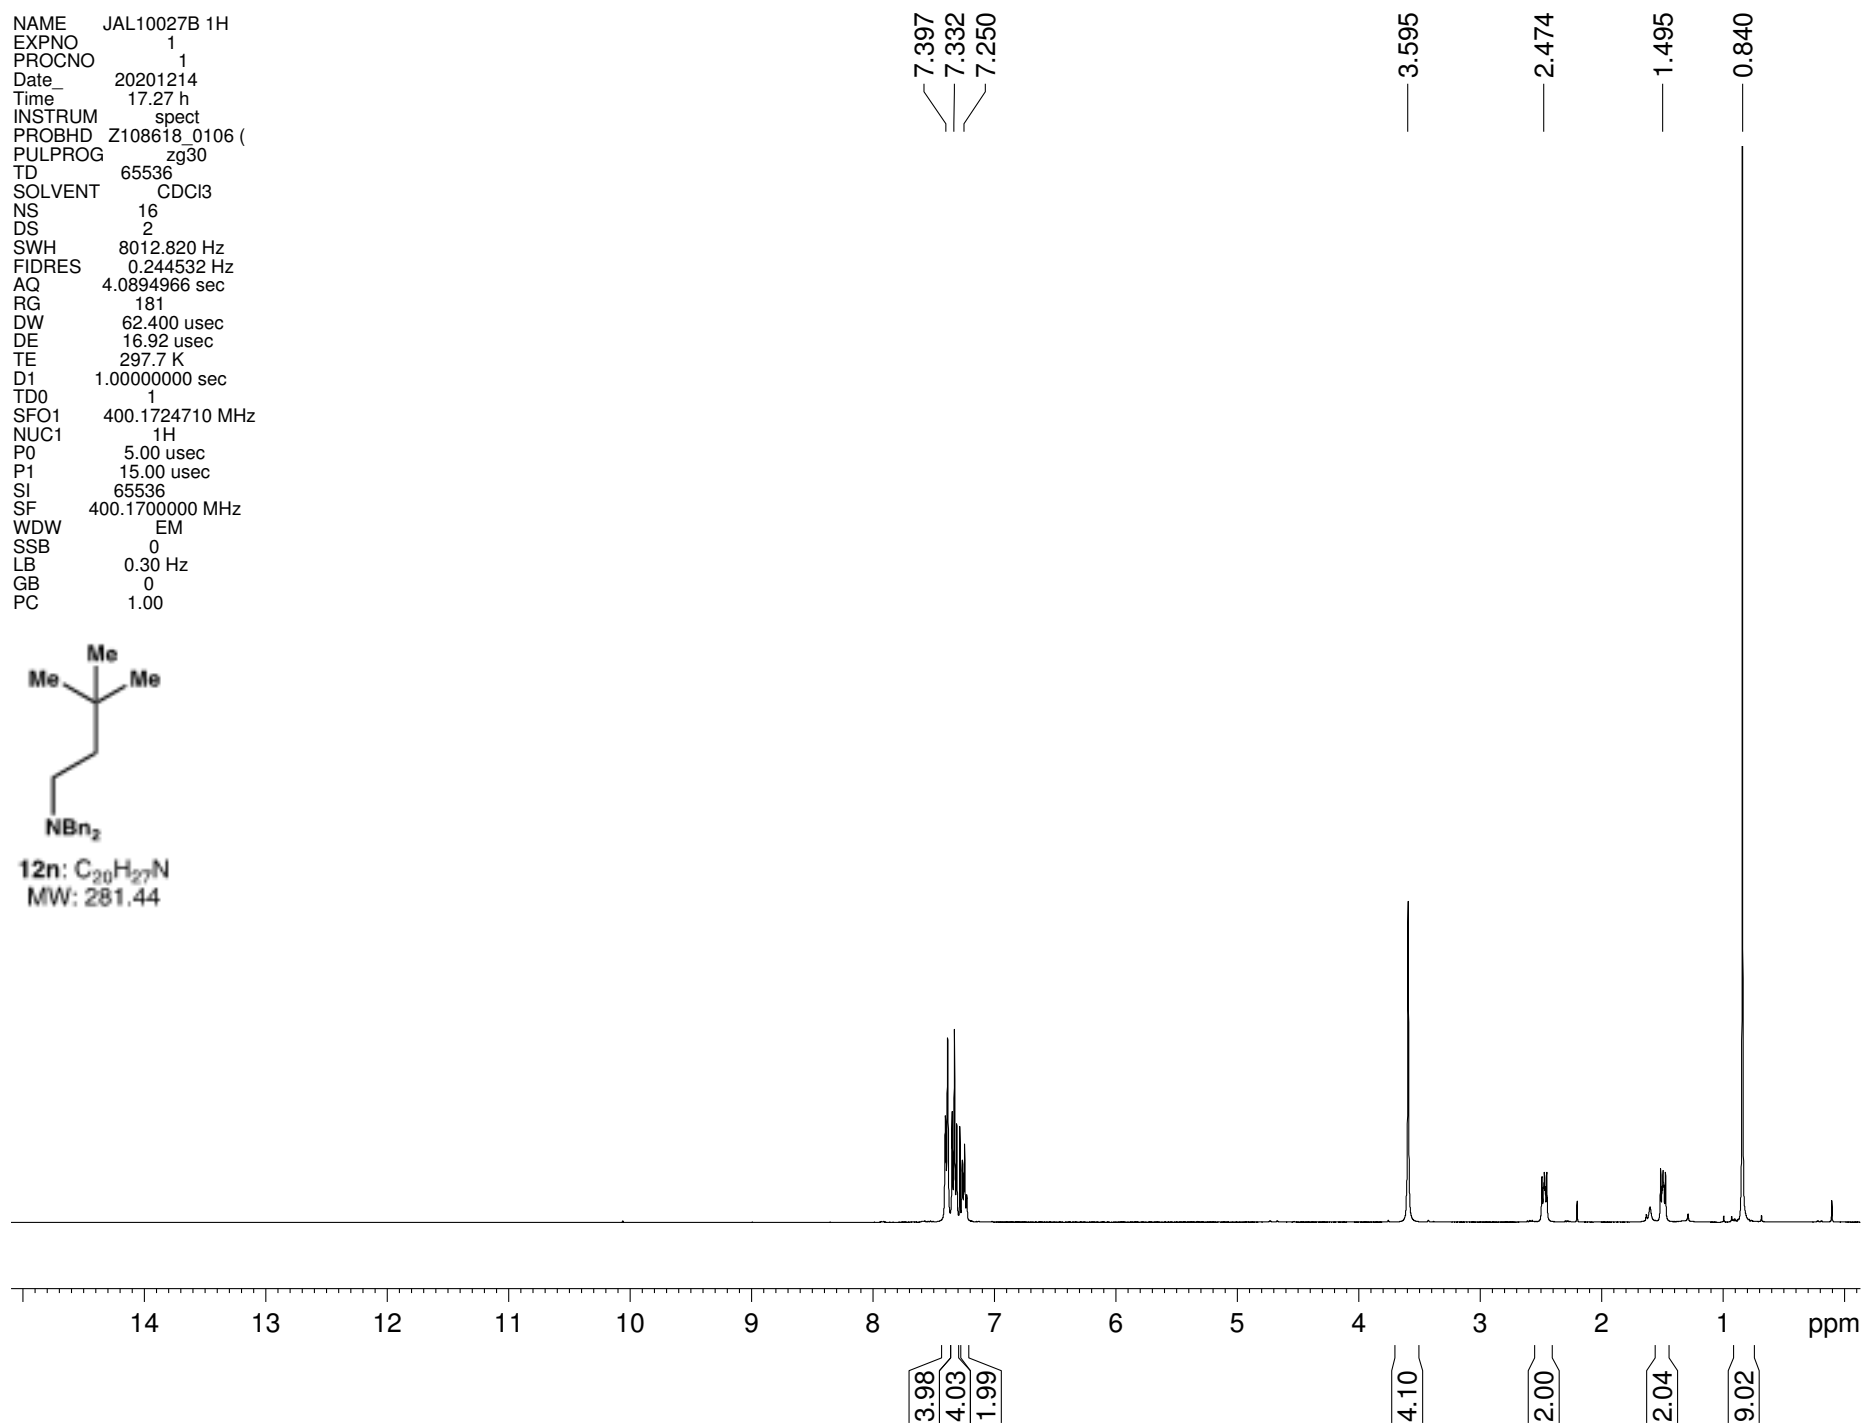



NAME JAL10027B 13C B700  
EXPNO 1  
PROCNO 1  
Date\_ 20201230  
Time 13.26 h  
INSTRUM spect  
PROBHD Z75813\_0011 (C  
PULPROG zgpg30  
TD 65536  
SOLVENT CDCl3  
NS 795  
DS 4  
SWH 42613.637 Hz  
FIDRES 1.300465 Hz  
AQ 0.7690057 sec  
RG 203  
DW 11.733 usec  
DE 18.00 usec  
TE 305.0 K  
D1 2.00000000 sec  
D11 0.03000000 sec  
TD0 1  
SFO1 176.0880661 MHz  
NUC1 13C  
P0 4.00 usec  
P1 12.00 usec  
SI 32768  
SF 176.0704590 MHz  
WDW EM  
SSB 0  
LB 1.00 Hz  
GB 0  
PC 1.40

140.01  
128.83  
128.74  
128.63  
128.19  
128.07  
126.75  
126.62

77.21  
77.03  
76.85

58.17

49.23

40.26

29.88

29.58

29.54

29.49

29.45

29.41

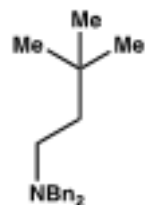

12n: C<sub>20</sub>H<sub>27</sub>N  
MW: 281.44

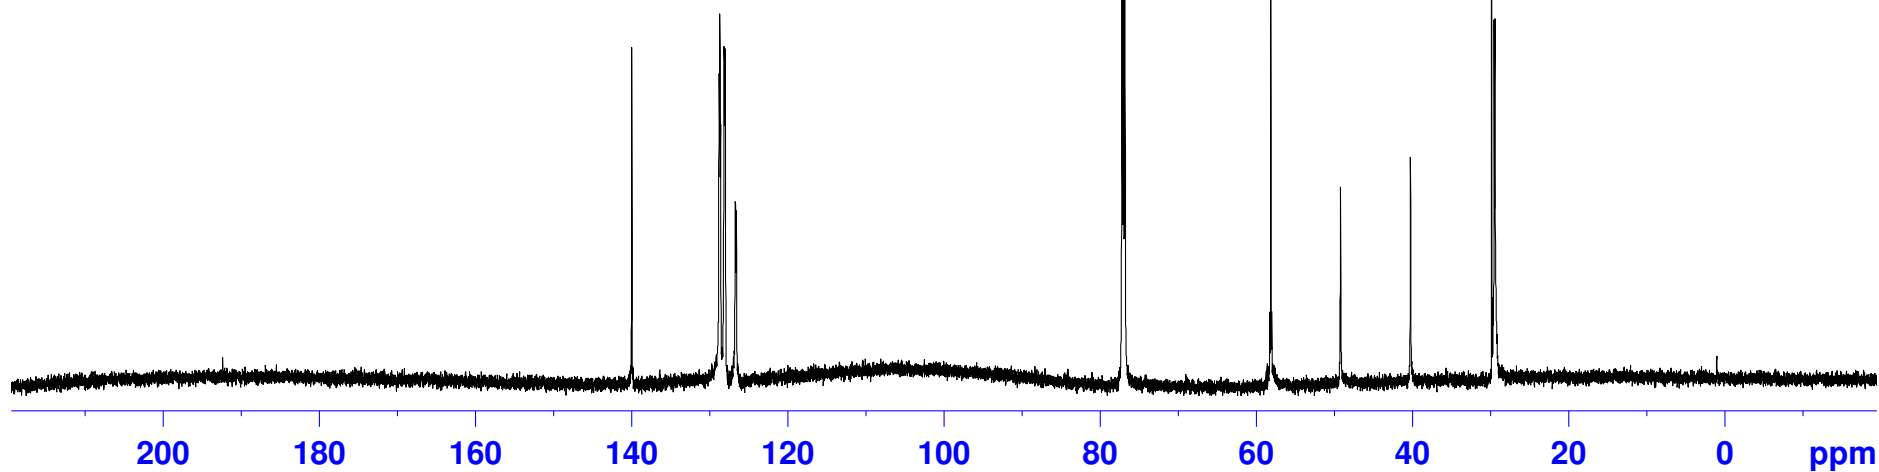

NAME NMB2129 1H  
EXPNO 1  
PROCNO 1  
Date\_ 20201227  
Time 23.42 h  
INSTRUM spect  
PROBHD Z108618\_0106 (  
PULPROG zg30  
TD 65536  
SOLVENT CDCl3  
NS 16  
DS 2  
SWH 8012.820 Hz  
FIDRES 0.244532 Hz  
AQ 4.0894966 sec  
RG 203  
DW 62.400 usec  
DE 16.92 usec  
TE 297.5 K  
D1 1.00000000 sec  
TD0 1  
SFO1 400.1724710 MHz  
NUC1 1H  
P0 5.00 usec  
P1 15.00 usec  
SI 65536  
SF 400.1700000 MHz  
WDW no  
SSB 0  
LB 0.00 Hz  
GB 0  
PC 1.00

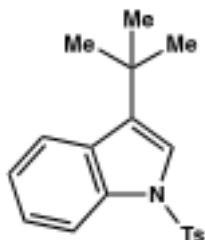

12o: C<sub>19</sub>H<sub>21</sub>NO<sub>2</sub>S  
MW: 327.44

8.004  
7.771  
7.728  
7.294  
7.238

2.364

1.427

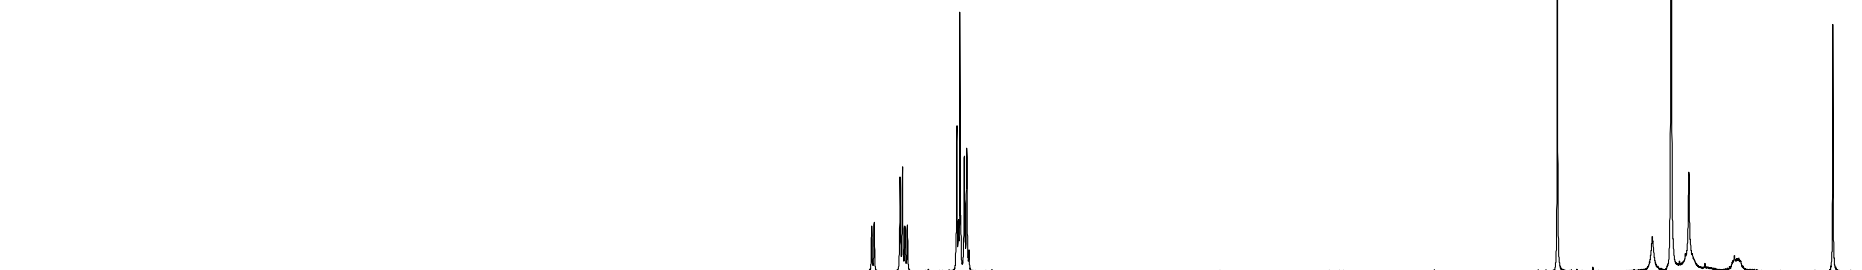

1.00  
2.09  
1.09  
2.84  
3.19

3.38

9.45

NAME NMB2129 13C  
EXPNO 1  
PROCNO 1  
Date\_ 20201227  
Time 23.10 h  
INSTRUM spect  
PROBHD Z108618\_0106 (  
PULPROG zgpg30  
TD 65536  
SOLVENT CDCl3  
NS 850  
DS 4  
SWH 24038.461 Hz  
FIDRES 0.733596 Hz  
AQ 1.3631988 sec  
RG 203  
DW 20.800 usec  
DE 6.50 usec  
TE 297.9 K  
D1 2.00000000 sec  
D11 0.03000000 sec  
TD0 1  
SFO1 100.6328888 MHz  
NUC1 13C  
P0 3.53 usec  
P1 10.60 usec  
SI 32768  
SF 100.6228280 MHz  
WDW EM  
SSB 0  
LB 1.00 Hz  
GB 0  
PC 1.40

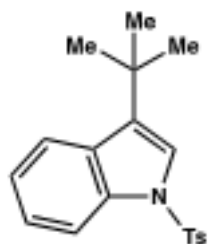

12o: C<sub>19</sub>H<sub>21</sub>NO<sub>2</sub>S  
MW: 327.44

144.78  
136.23  
135.63  
132.77  
129.93  
129.81  
126.91  
124.13  
122.67  
121.98  
121.17  
114.04

31.95  
30.25  
29.85  
21.68

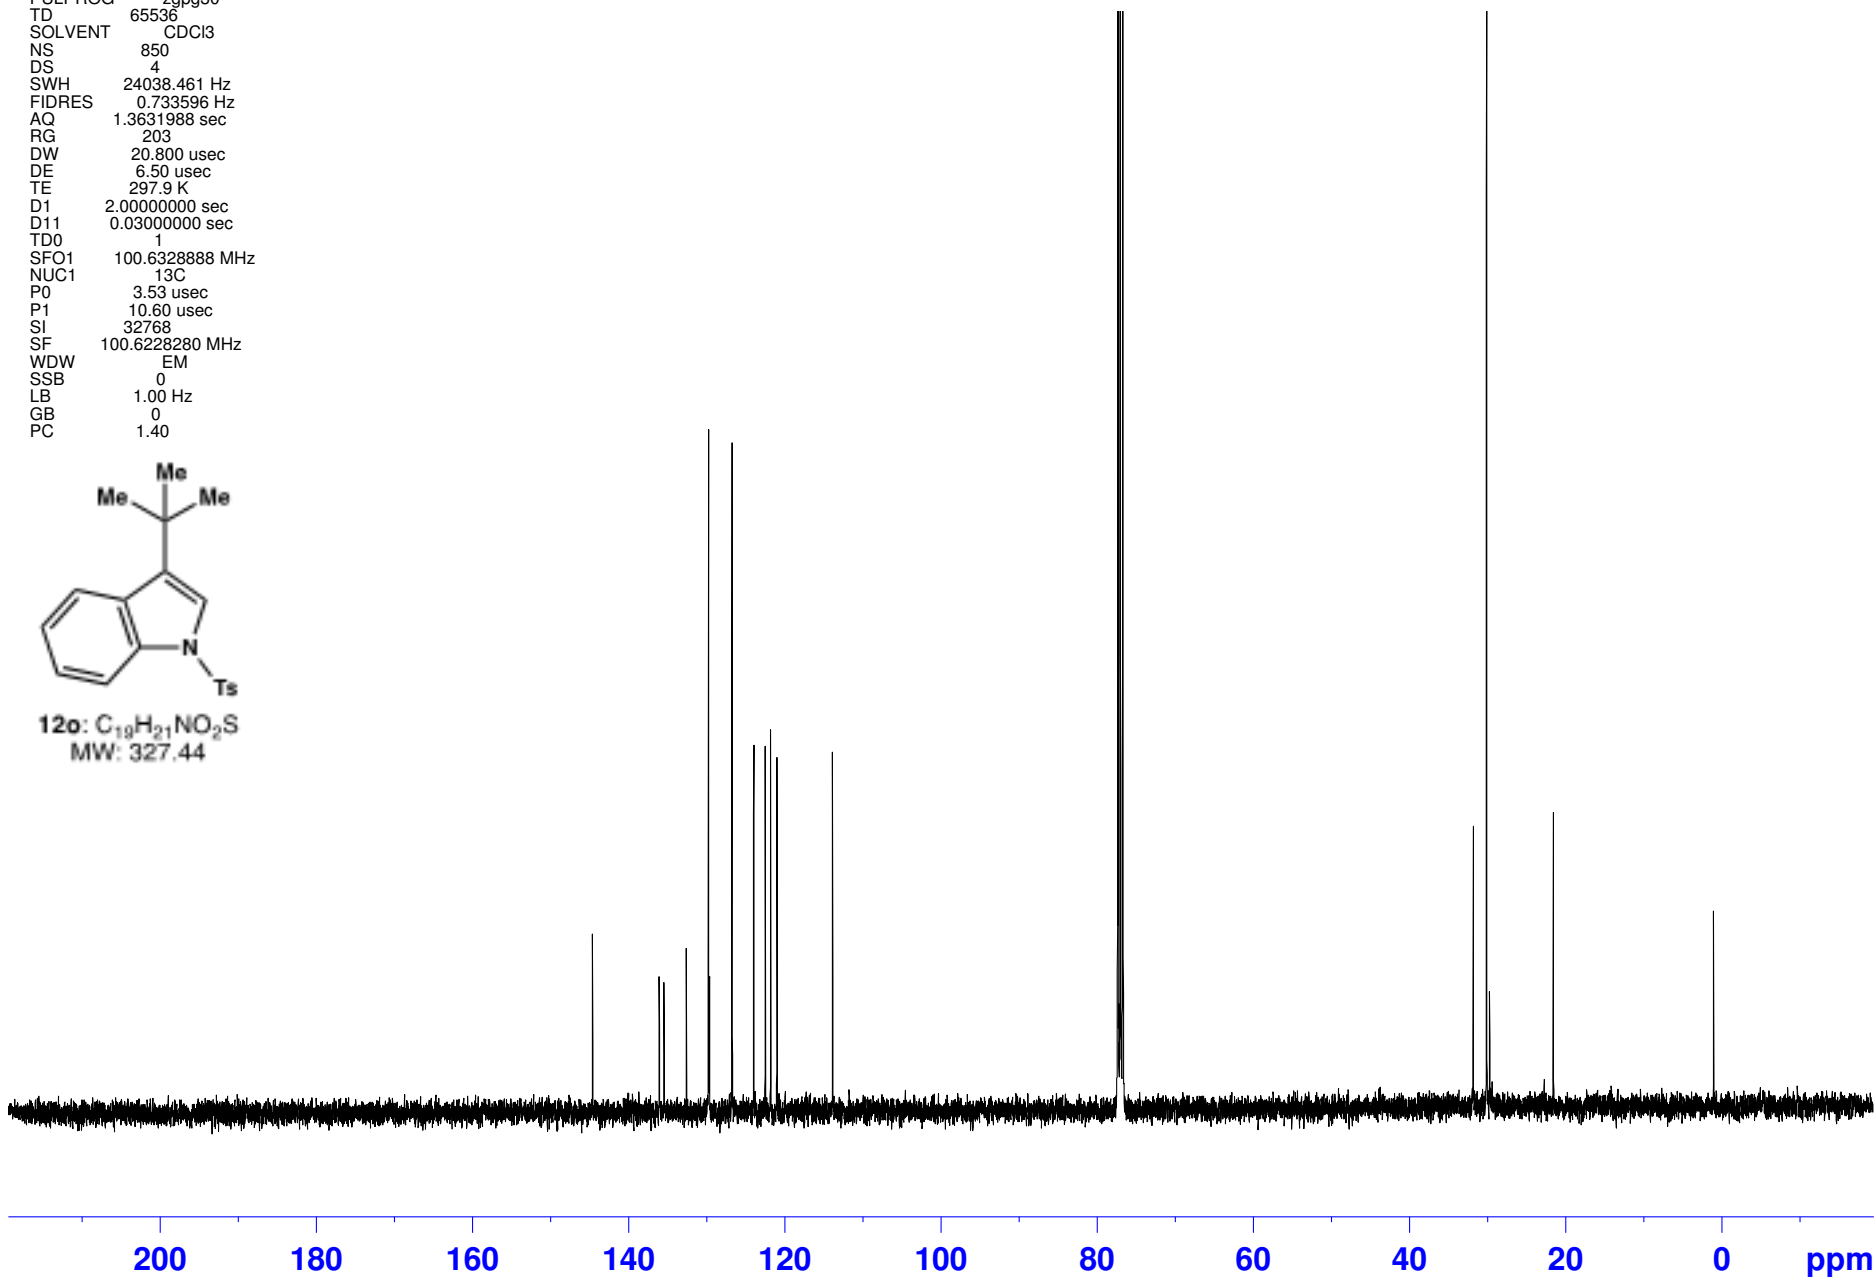

NAME NMB2146 1H  
EXPNO 1  
PROCNO 1  
Date\_ 20210105  
Time 16.36 h  
INSTRUM spect  
PROBHD Z108618\_0106 (  
PULPROG zg30  
TD 65536  
SOLVENT CDCl3  
NS 16  
DS 2  
SWH 8012.820 Hz  
FIDRES 0.244532 Hz  
AQ 4.0894966 sec  
RG 203  
DW 62.400 usec  
DE 16.92 usec  
TE 297.8 K  
D1 1.00000000 sec  
TD0 1  
SFO1 400.1724710 MHz  
NUC1 1H  
P0 5.00 usec  
P1 15.00 usec  
SI 65536  
SF 400.1700100 MHz  
WDW no  
SSB 0  
LB 0.00 Hz  
GB 0  
PC 1.00

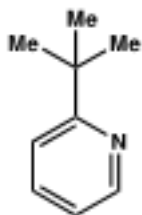

**12p**: C<sub>9</sub>H<sub>13</sub>N  
MW: 135.21

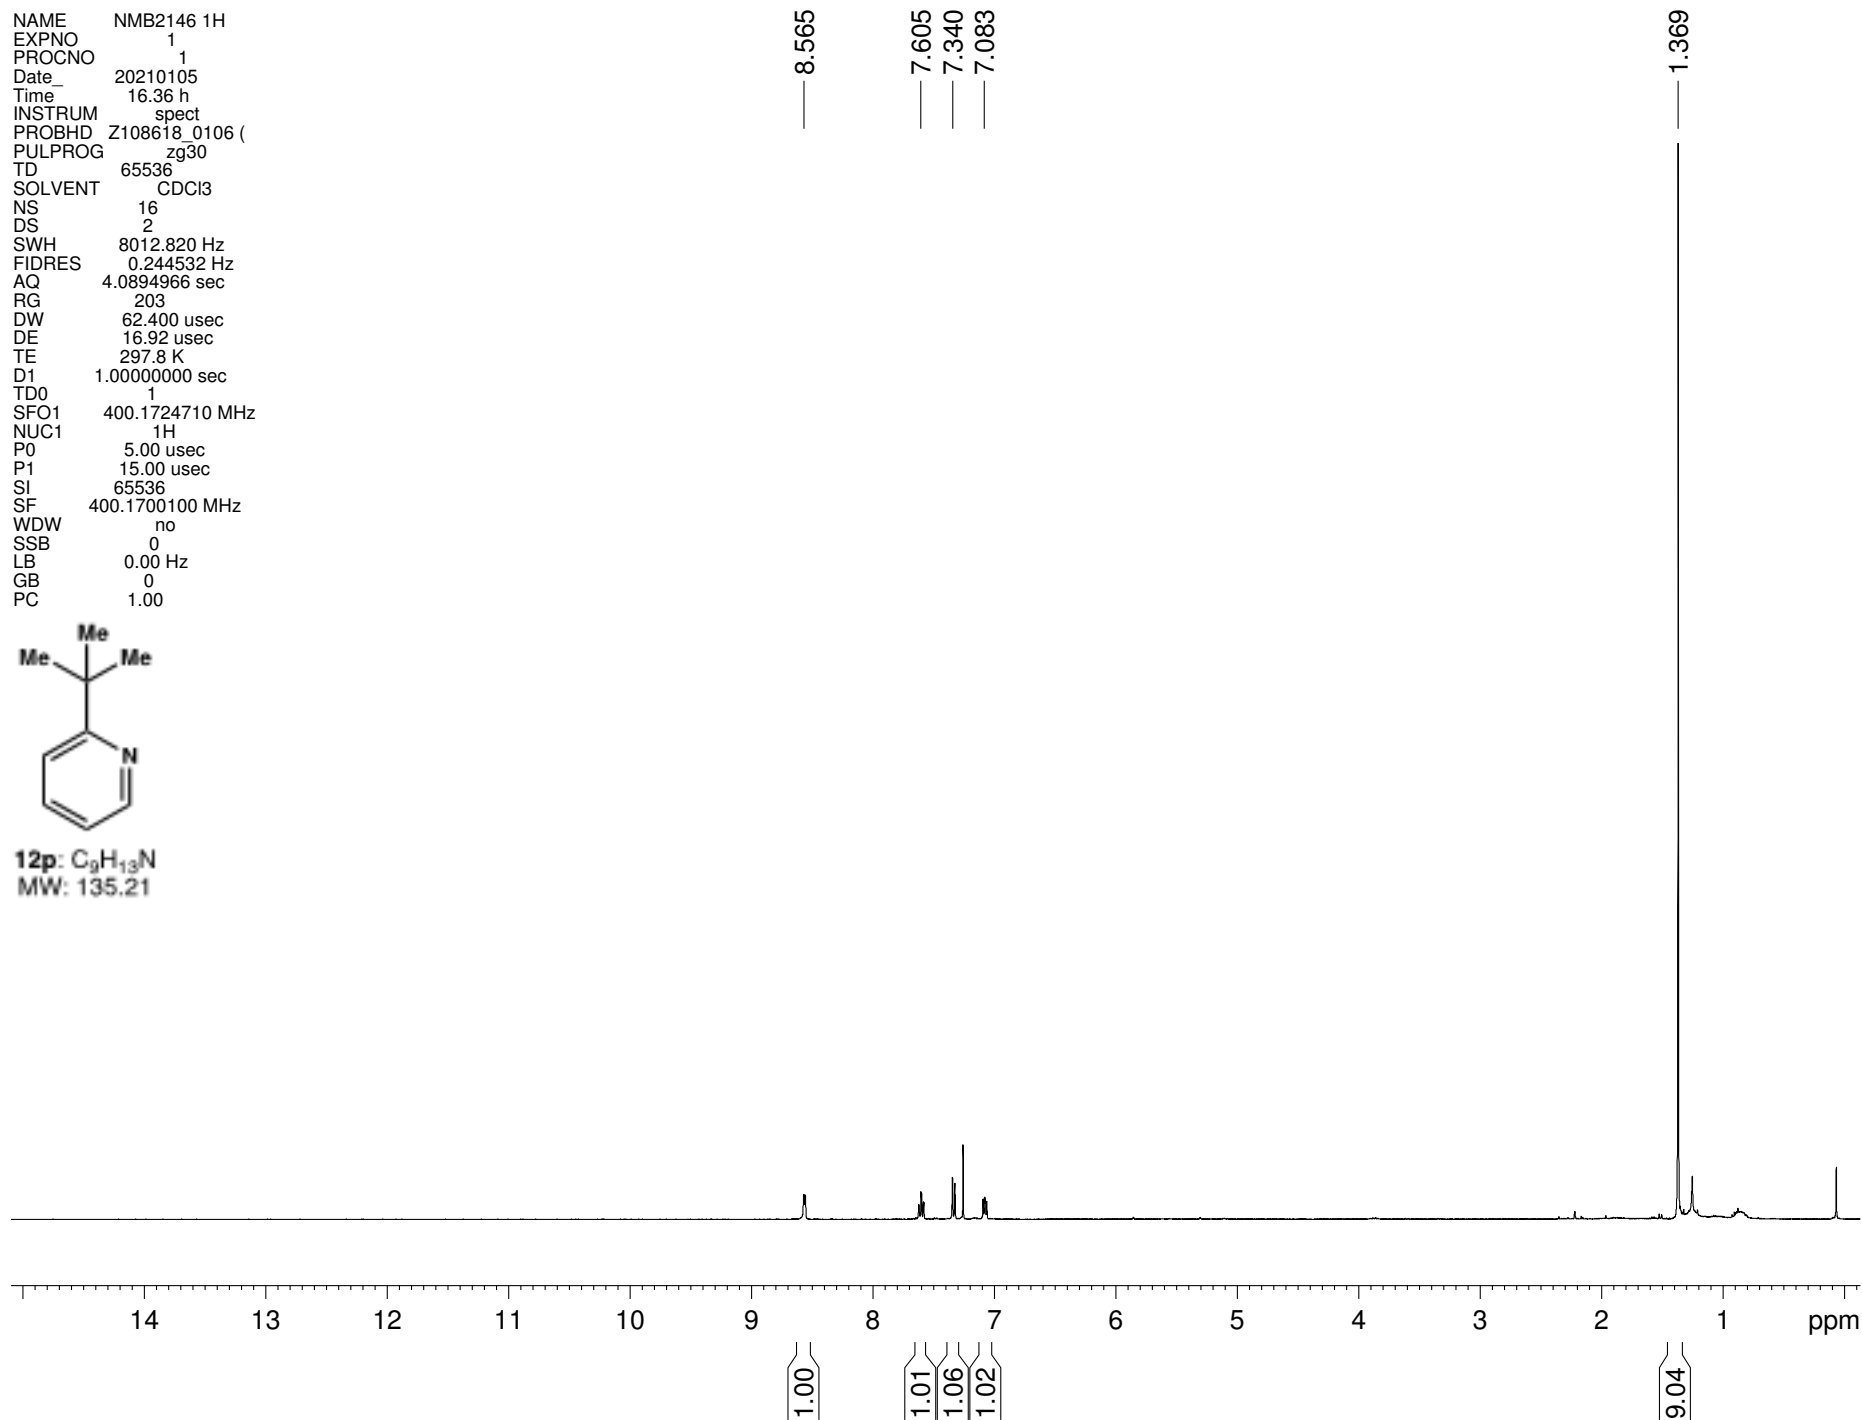

NAME NMB2148 1H  
EXPNO 1  
PROCNO 1  
Date\_ 20210110  
Time 19.14 h  
INSTRUM spect  
PROBHD Z108618\_0106 (  
PULPROG zg30  
TD 65536  
SOLVENT CDCl3  
NS 16  
DS 2  
SWH 8012.820 Hz  
FIDRES 0.244532 Hz  
AQ 4.0894966 sec  
RG 203  
DW 62.400 usec  
DE 16.92 usec  
TE 297.7 K  
D1 1.00000000 sec  
TD0 1  
SFO1 400.1724710 MHz  
NUC1 1H  
P0 5.00 usec  
P1 15.00 usec  
SI 65536  
SF 400.1700100 MHz  
WDW no  
SSB 0  
LB 0.00 Hz  
GB 0  
PC 1.00

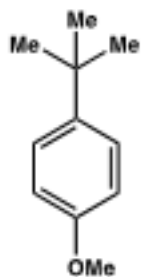

12q: C<sub>11</sub>H<sub>16</sub>O  
MW: 164.25

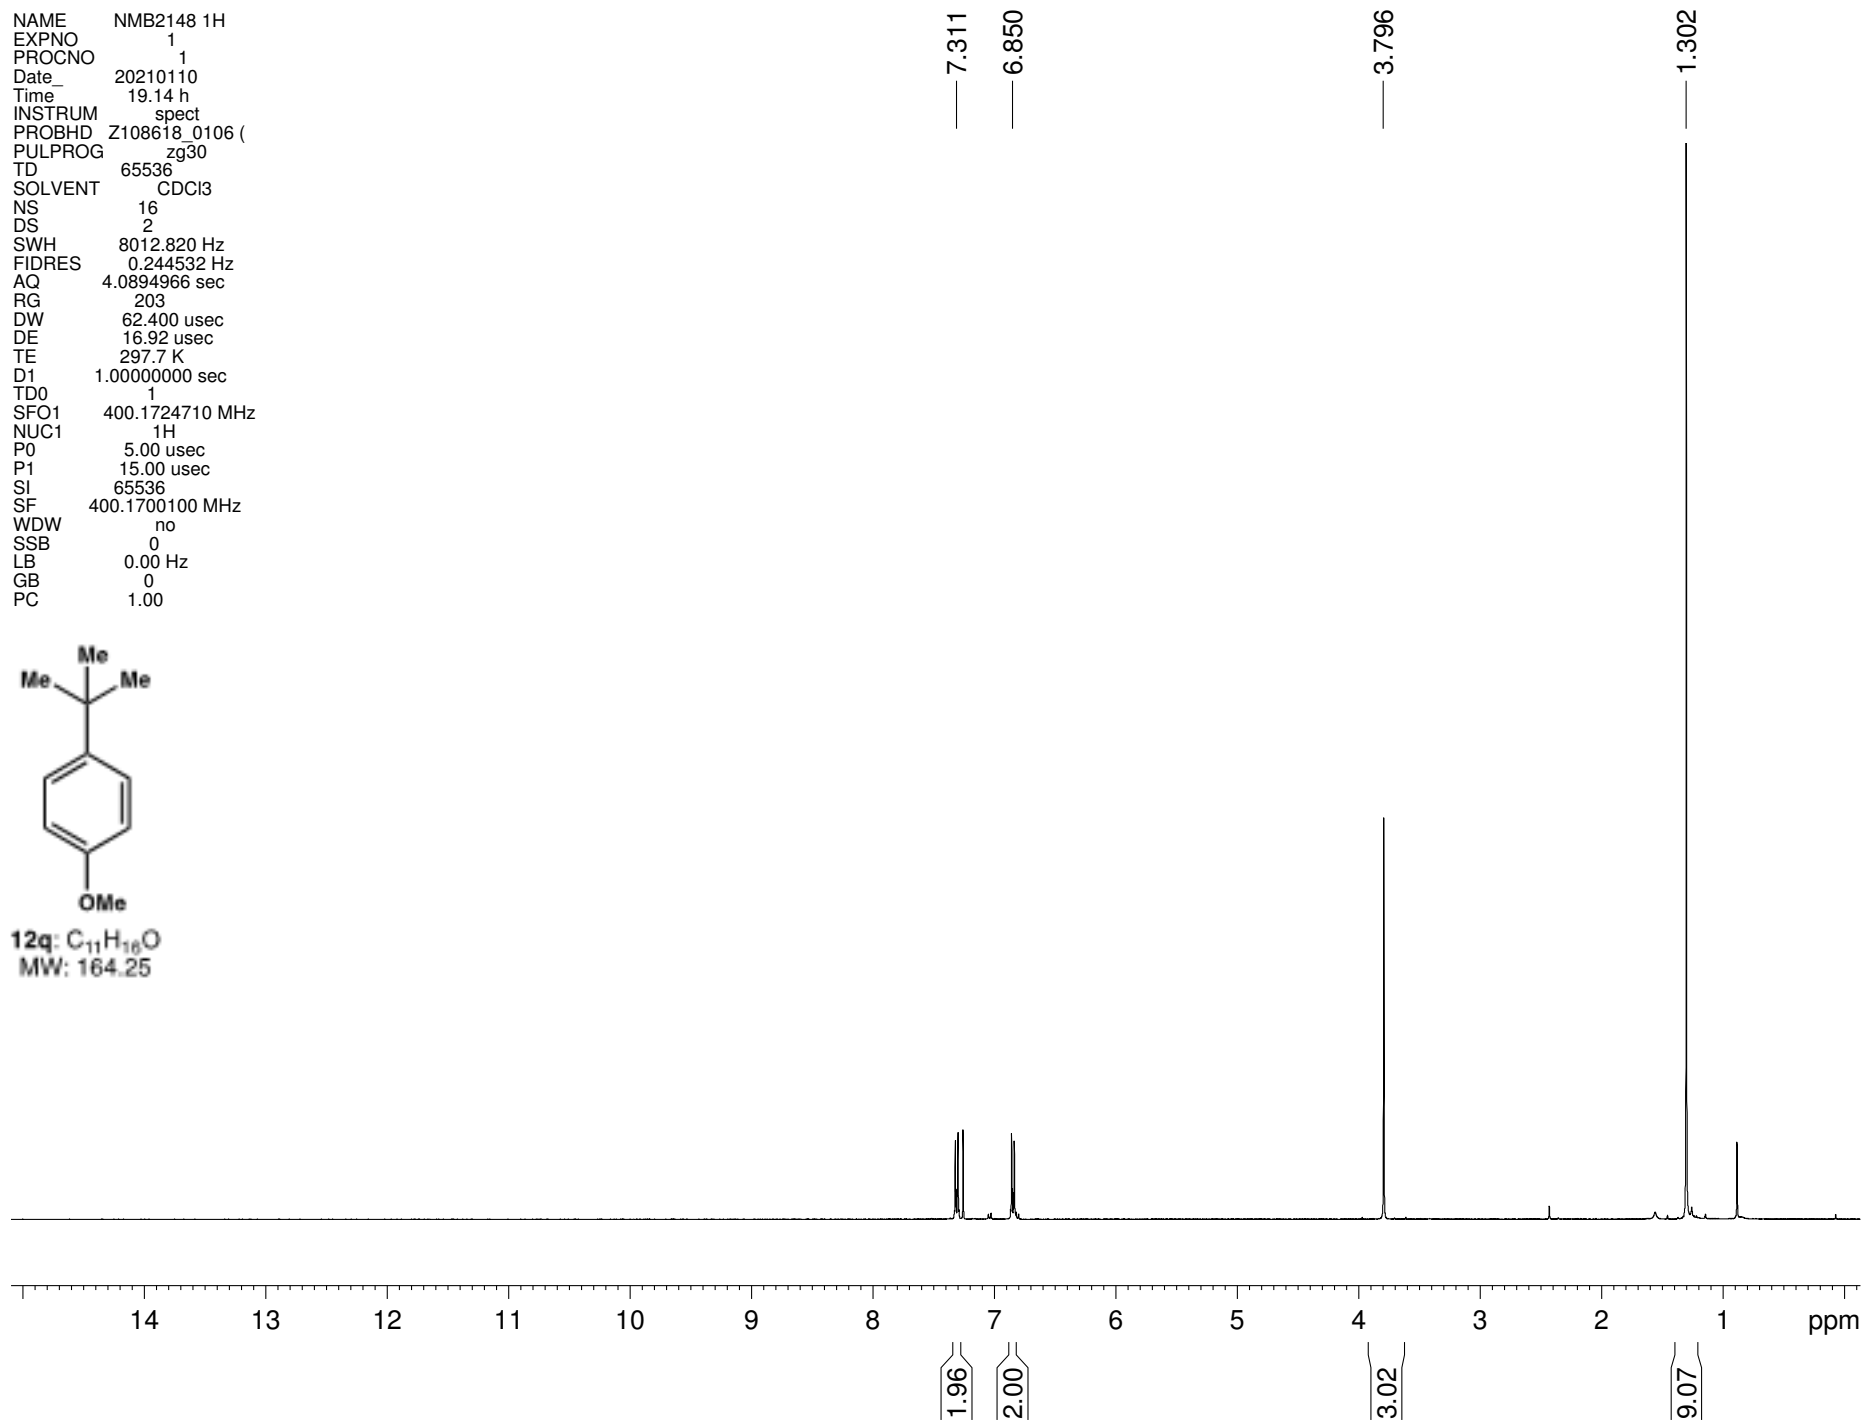

NAME NMB2123 1H  
EXPNO 1  
PROCNO 1  
Date\_ 20201221  
Time 18.24 h  
INSTRUM spect  
PROBHD Z108618\_0106 (  
PULPROG zg30  
TD 65536  
SOLVENT CDCl3  
NS 16  
DS 2  
SWH 8012.820 Hz  
FIDRES 0.244532 Hz  
AQ 4.0894966 sec  
RG 203  
DW 62.400 usec  
DE 16.92 usec  
TE 297.8 K  
D1 1.00000000 sec  
TD0 1  
SFO1 400.1724710 MHz  
NUC1 1H  
P0 5.00 usec  
P1 15.00 usec  
SI 65536  
SF 400.1700000 MHz  
WDW no  
SSB 0  
LB 0.00 Hz  
GB 0  
PC 1.00

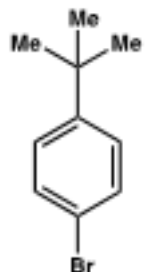

**12r:** C<sub>10</sub>H<sub>13</sub>Br  
MW: 213.12

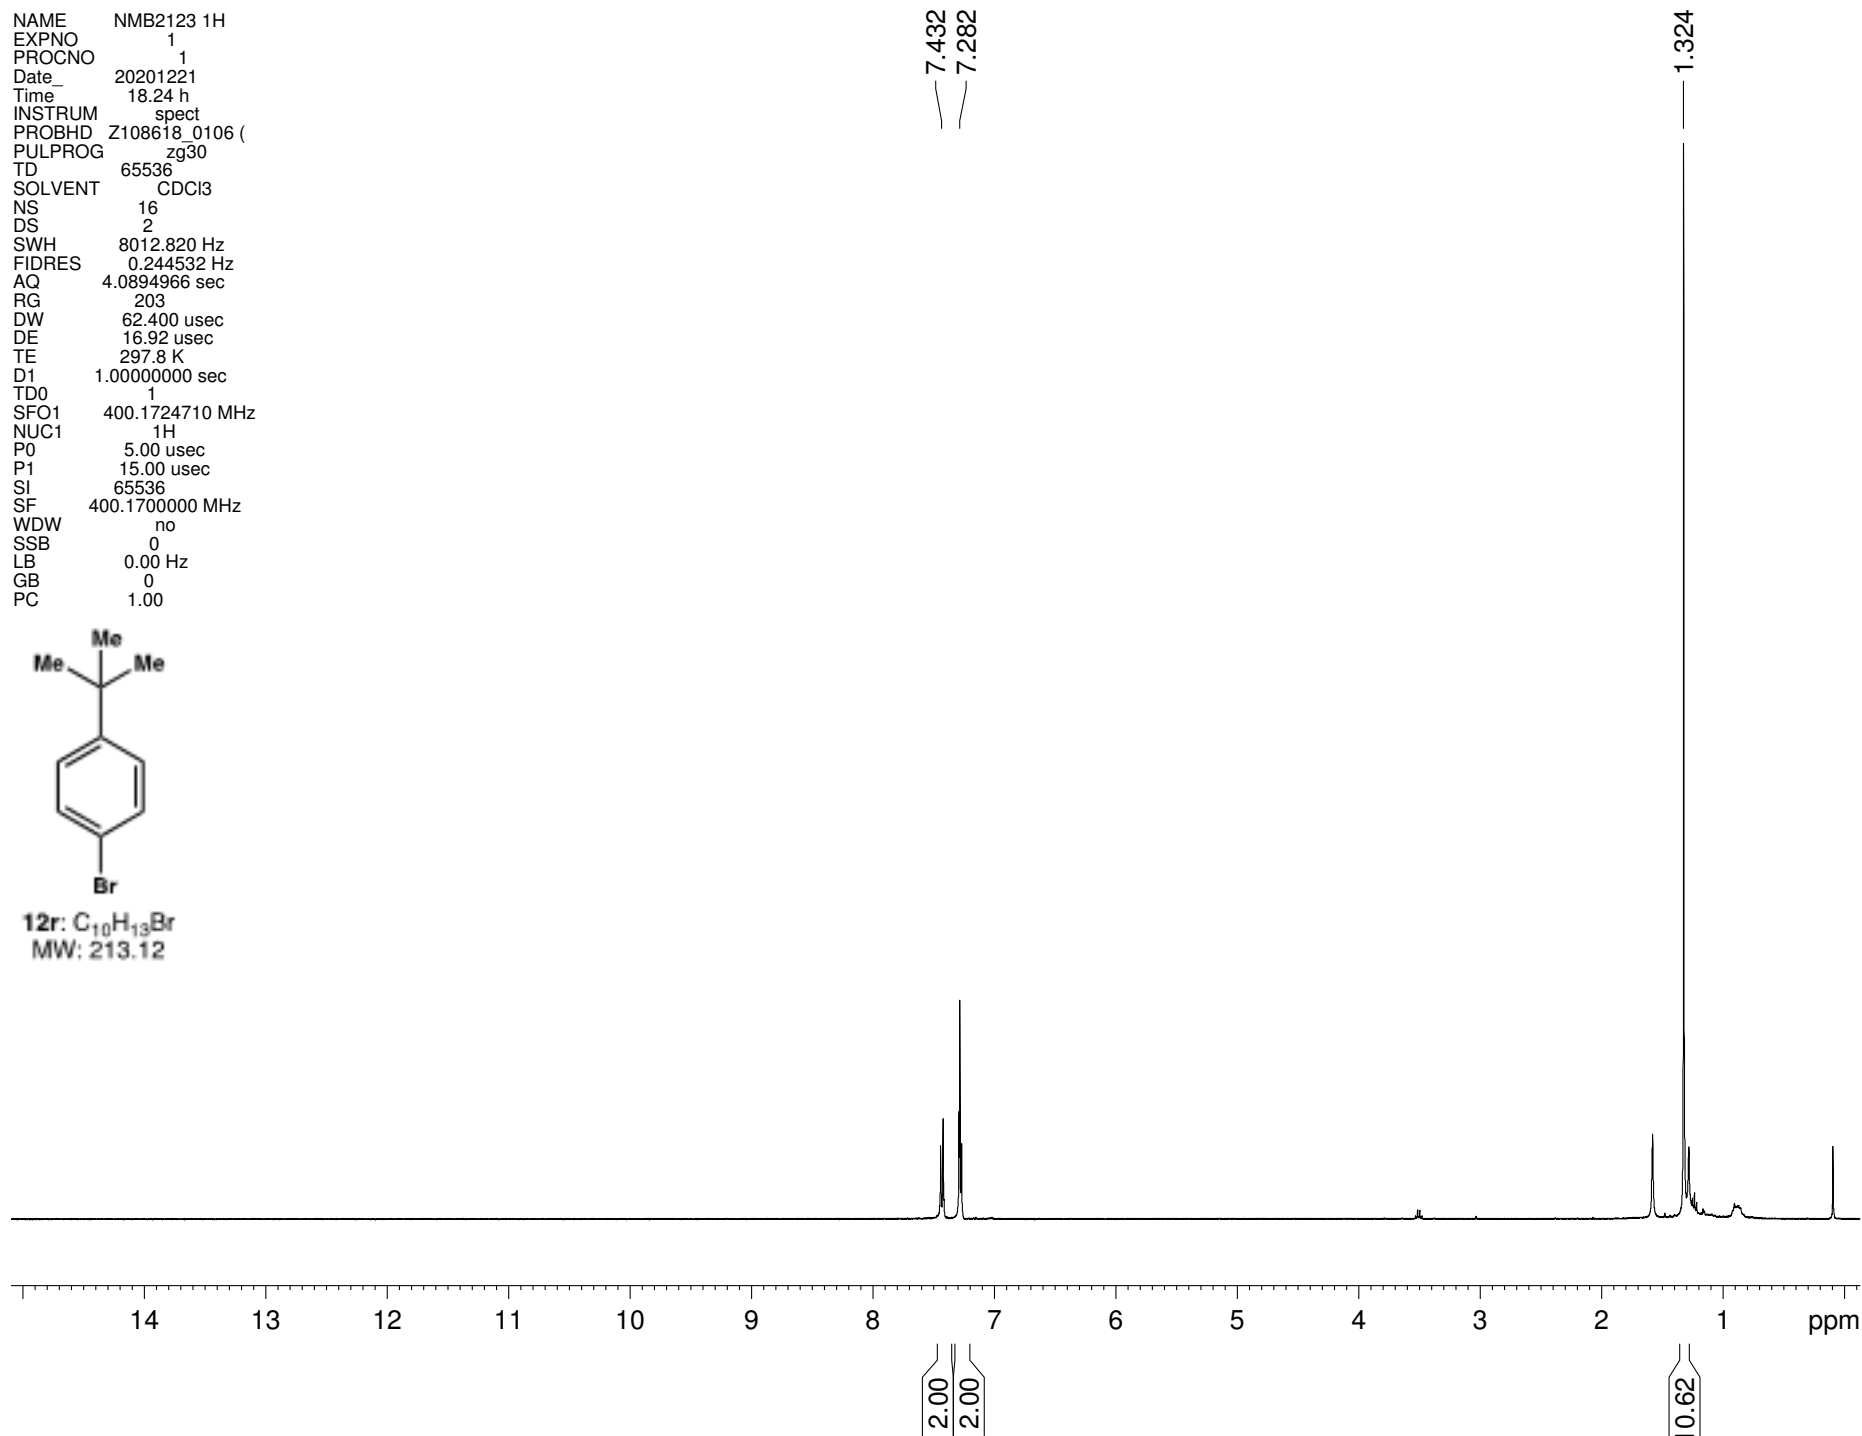

NAME NMB2131 1H  
EXPNO 1  
PROCNO 1  
Date\_ 20201228  
Time 12.38 h  
INSTRUM spect  
PROBHD Z108618\_0106 (  
PULPROG zg30  
TD 65536  
SOLVENT CDCl3  
NS 16  
DS 2  
SWH 8012.820 Hz  
FIDRES 0.244532 Hz  
AQ 4.0894966 sec  
RG 203  
DW 62.400 usec  
DE 16.92 usec  
TE 297.7 K  
D1 1.00000000 sec  
TD0 1  
SFO1 400.1724710 MHz  
NUC1 1H  
P0 5.00 usec  
P1 15.00 usec  
SI 65536  
SF 400.1700000 MHz  
WDW no  
SSB 0  
LB 0.00 Hz  
GB 0  
PC 1.00

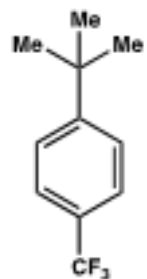

12s: C<sub>11</sub>H<sub>13</sub>F<sub>3</sub>  
MW: 202.22

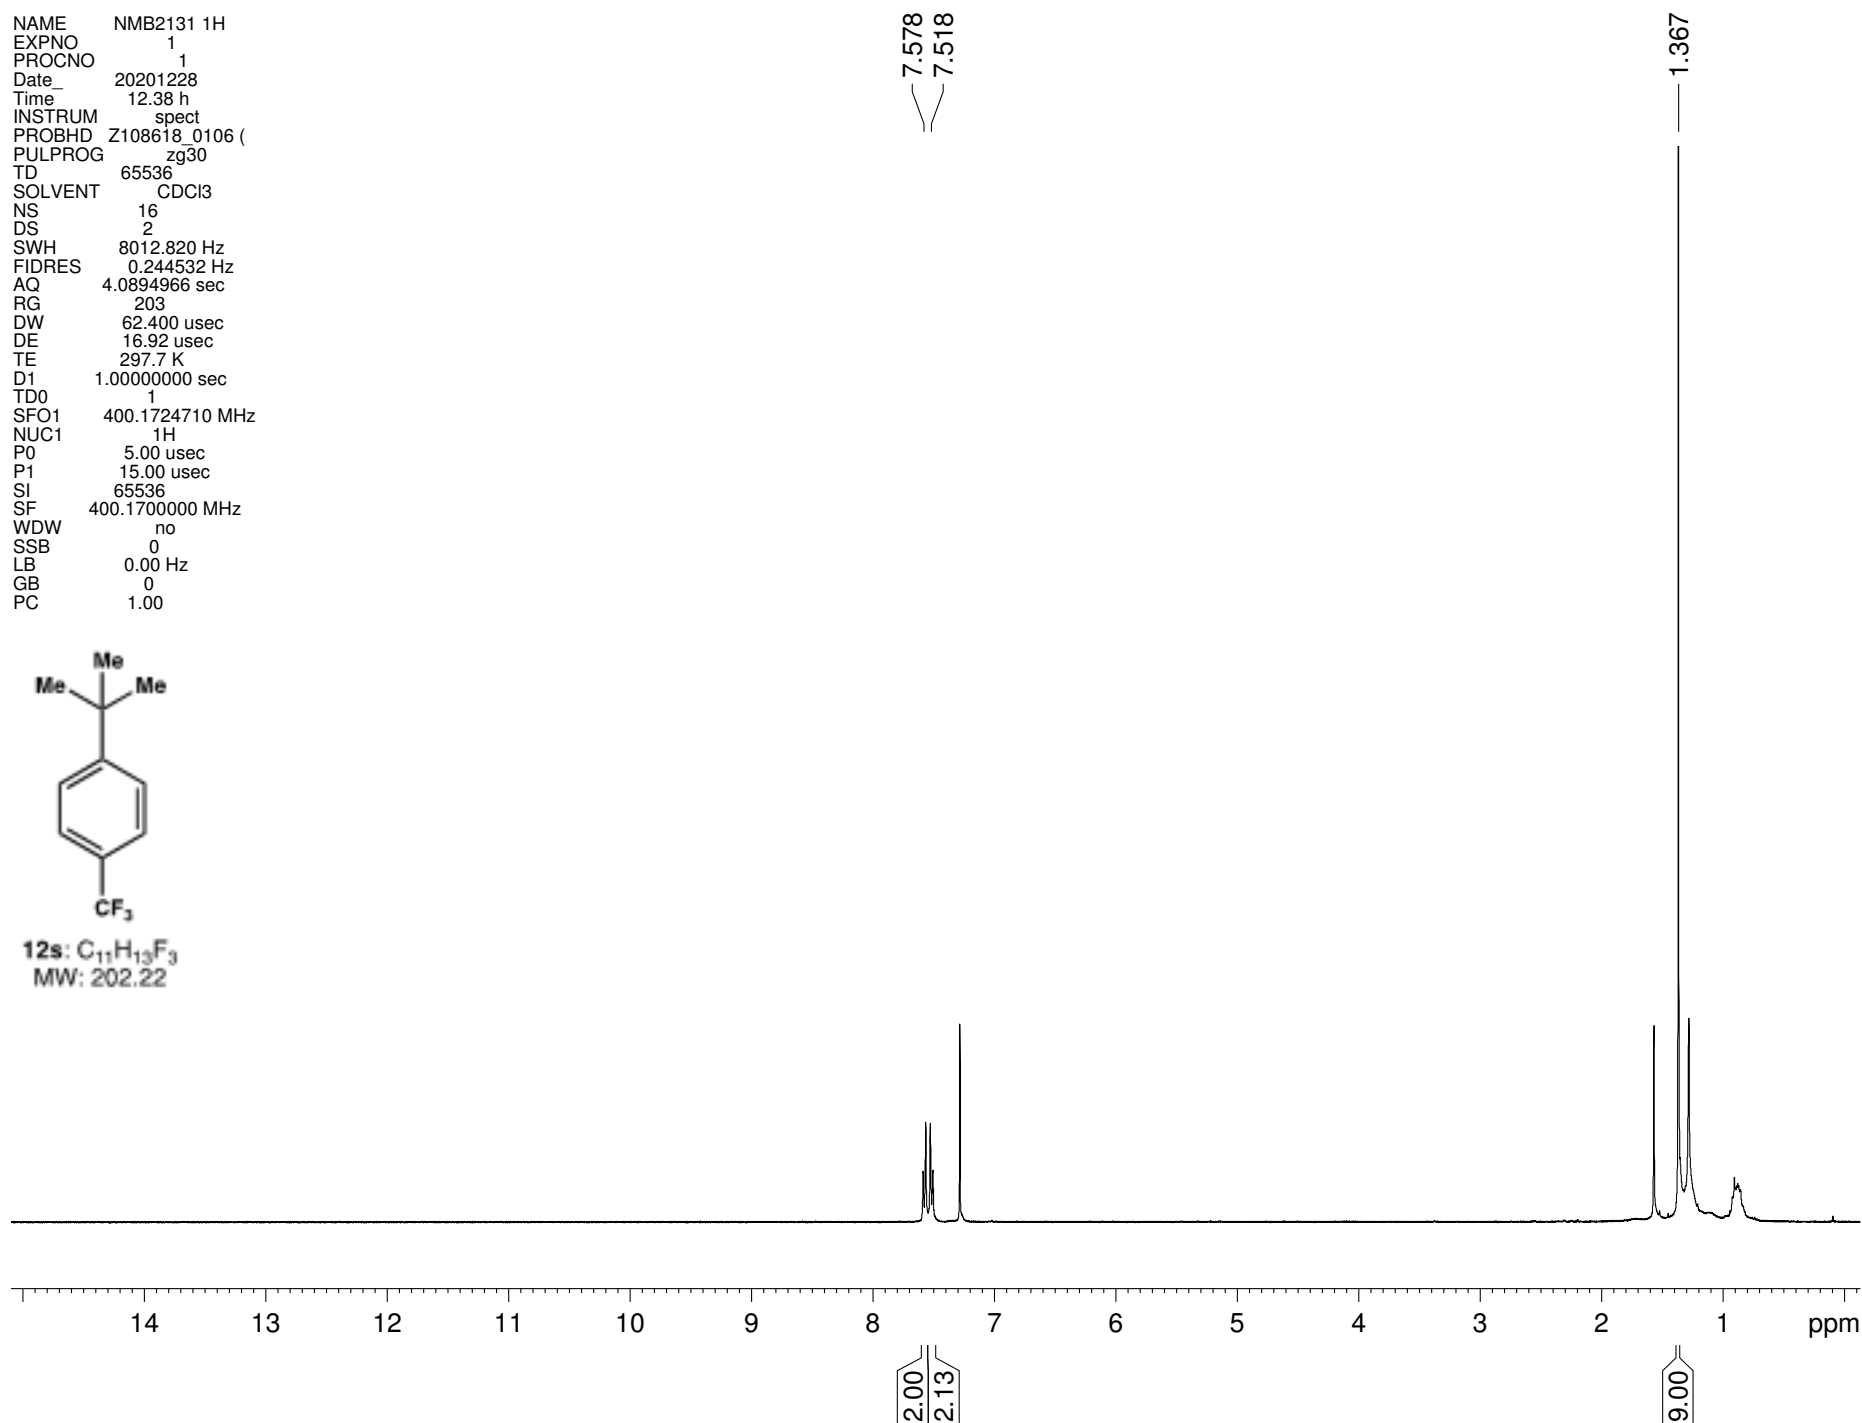

NAME JAL10072A 1H B600  
 EXPNO 1  
 PROCNO 1  
 Date\_ 20210109  
 Time 13.08 h  
 INSTRUM spect  
 PROBHD Z814601\_0054 (  
 PULPROG zg30  
 TD 65536  
 SOLVENT CDCl3  
 NS 16  
 DS 2  
 SWH 12019.230 Hz  
 FIDRES 0.366798 Hz  
 AQ 2.7263477 sec  
 RG 114  
 DW 41.600 usec  
 DE 11.27 usec  
 TE 298.2 K  
 D1 1.00000000 sec  
 TD0 1  
 SFO1 600.1337058 MHz  
 NUC1 1H  
 P0 3.33 usec  
 P1 10.00 usec  
 SI 65536  
 SF 600.1300000 MHz  
 WDW EM  
 SSB 0  
 LB 0.30 Hz  
 GB 0  
 PC 1.00

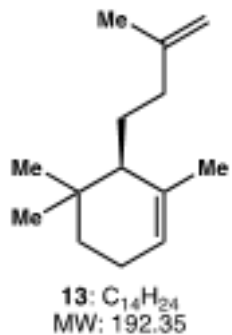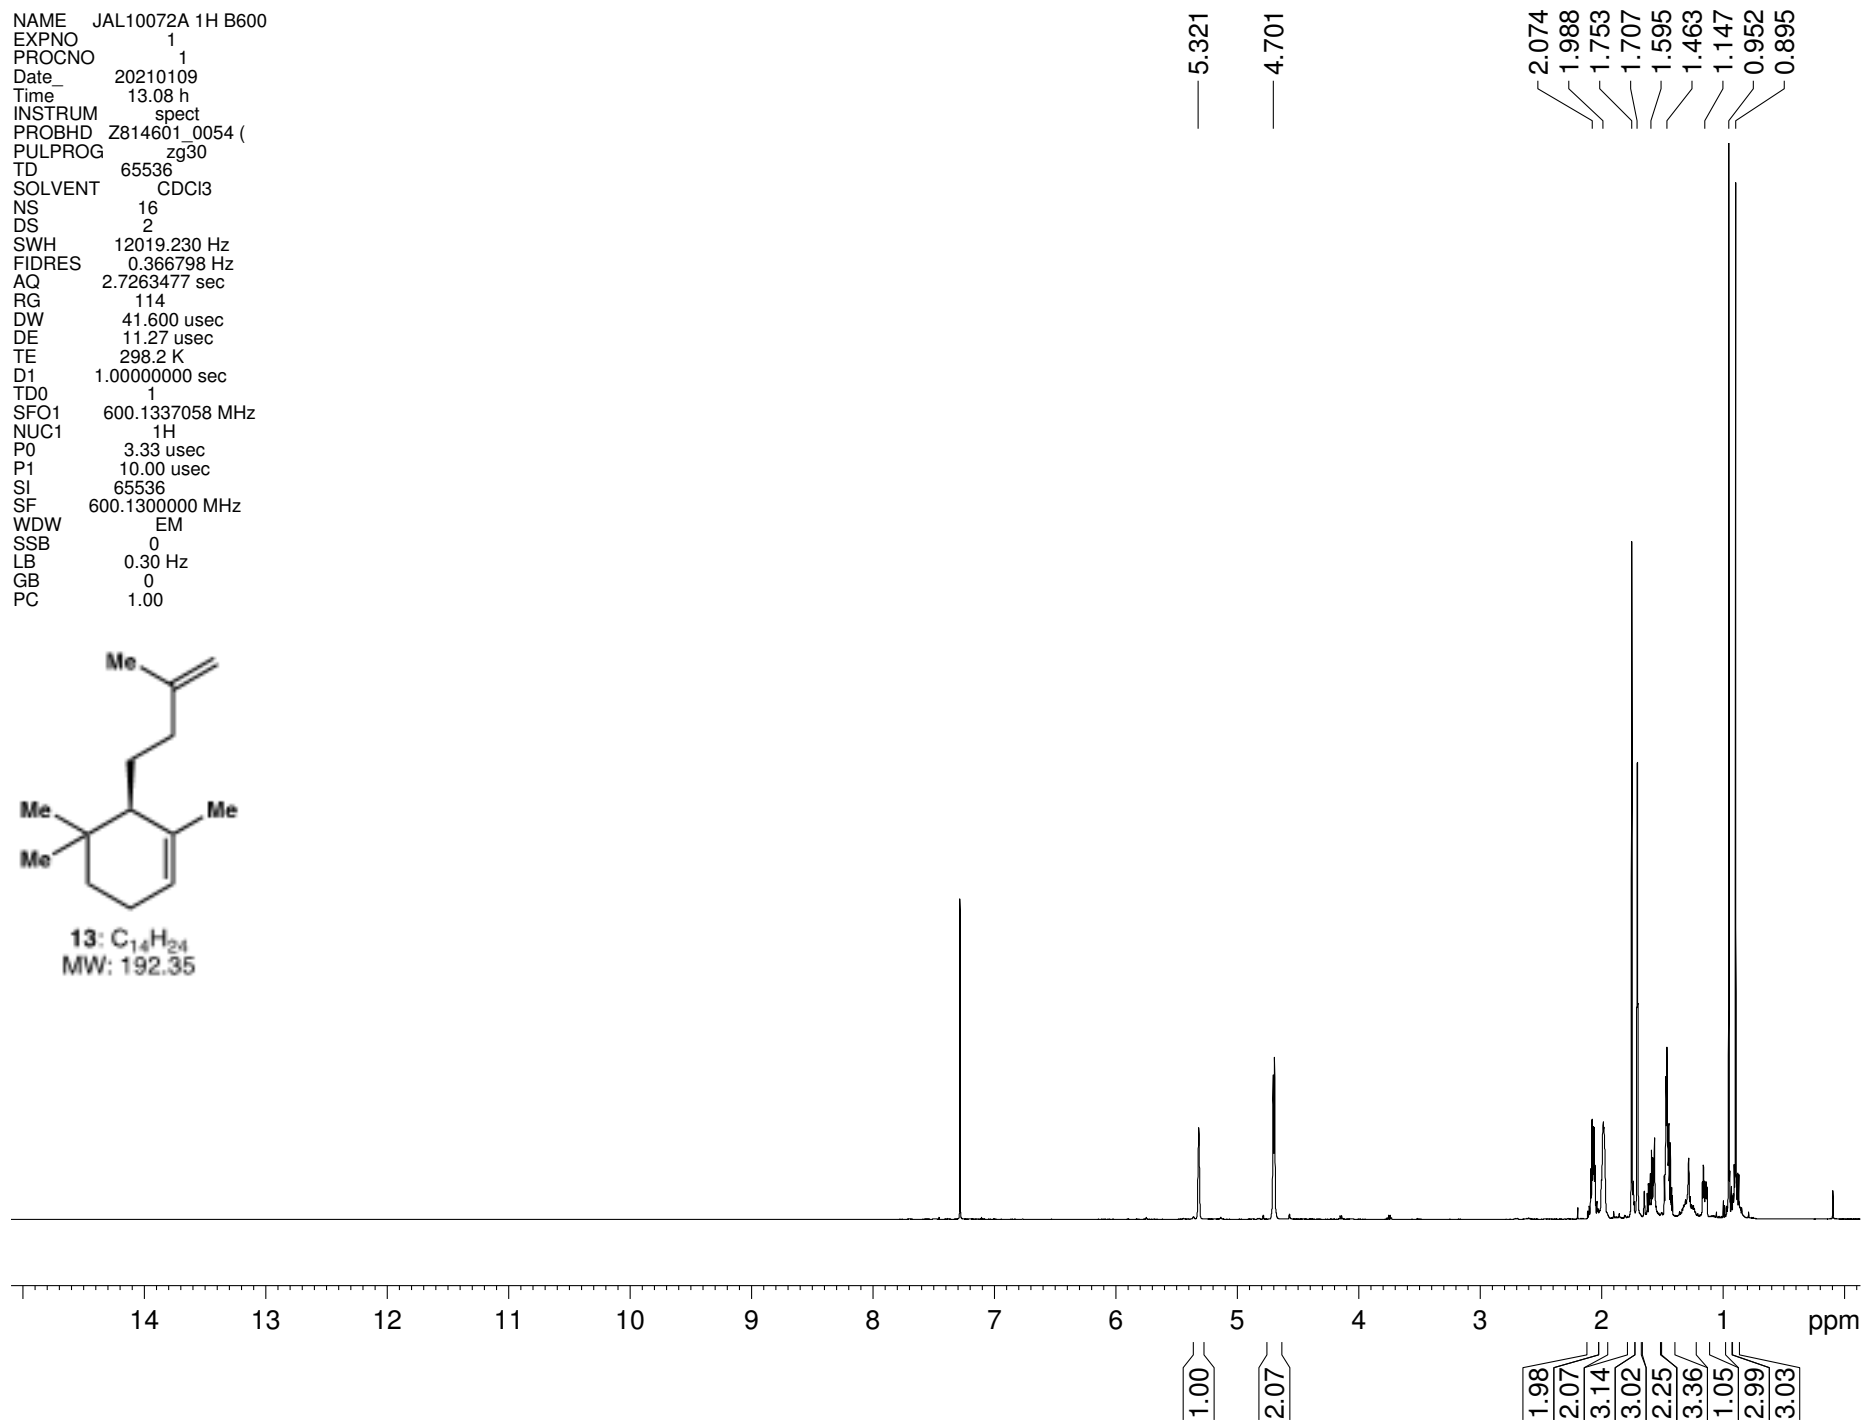



NAME JAL10073A 1H B700  
 EXPNO 1  
 PROCNO 1  
 Date\_ 20210110  
 Time 21.56 h  
 INSTRUM spect  
 PROBHD Z75813\_0011 (C  
 PULPROG zg30  
 TD 65536  
 SOLVENT CDCl3  
 NS 16  
 DS 2  
 SWH 14097.744 Hz  
 FIDRES 0.430229 Hz  
 AQ 2.3243935 sec  
 RG 3.56  
 DW 35.467 usec  
 DE 14.10 usec  
 TE 298.0 K  
 D1 1.00000000 sec  
 TD0 1  
 SFO1 700.2243239 MHz  
 NUC1 1H  
 P0 3.33 usec  
 P1 10.00 usec  
 SI 65536  
 SF 700.2200000 MHz  
 WDW EM  
 SSB 0  
 LB 0.30 Hz  
 GB 0  
 PC 1.00

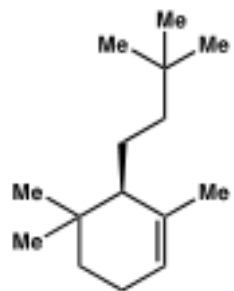

14: C<sub>15</sub>H<sub>28</sub>  
 MW: 208.39

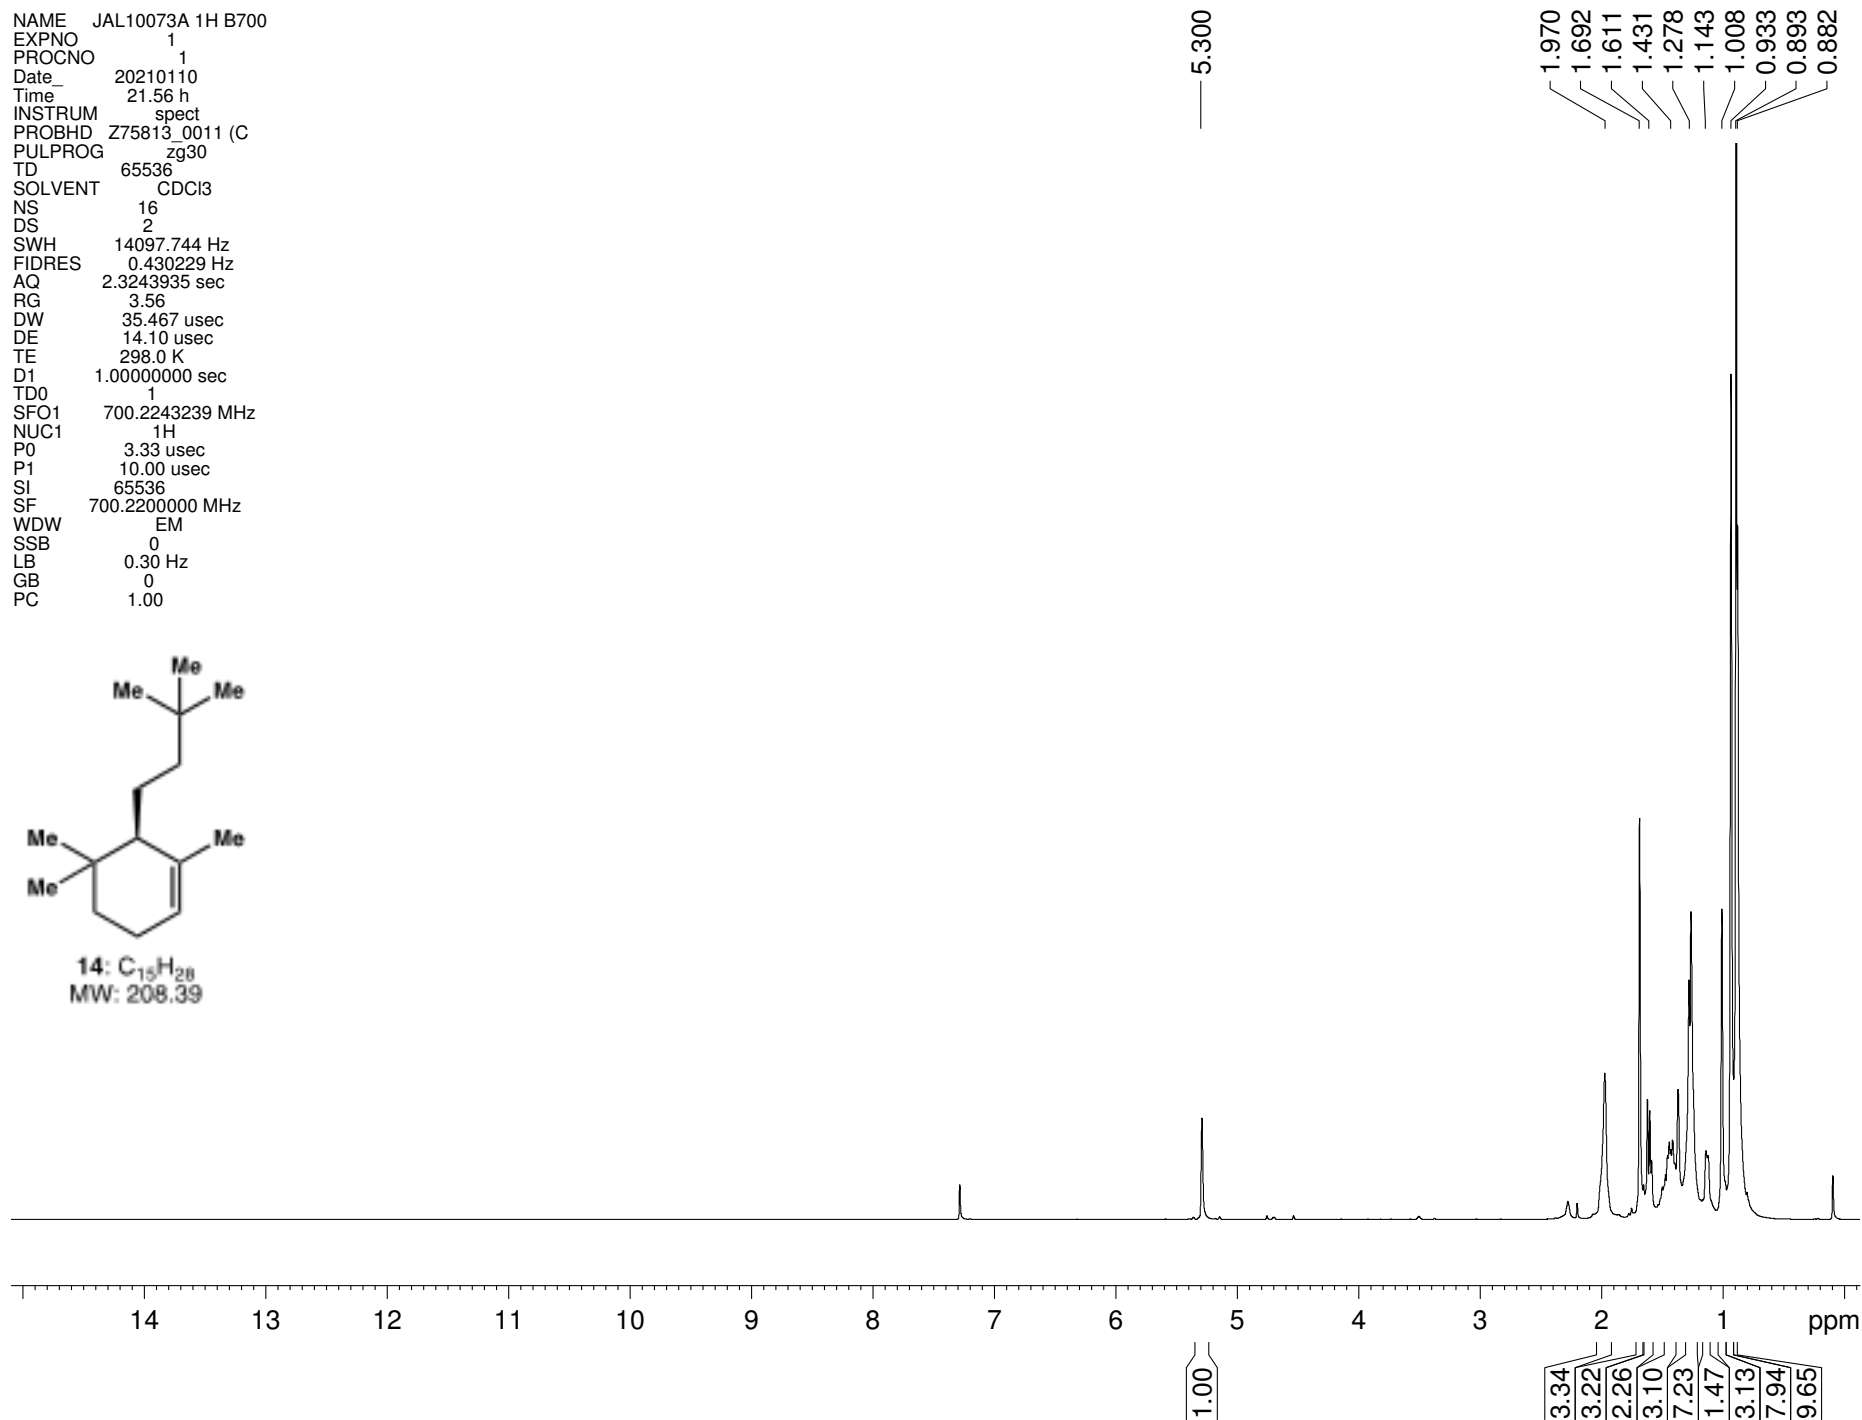

NAME JAL10073A 13C B700  
EXPNO 1  
PROCNO 1  
Date\_ 20210110  
Time 22.01 h  
INSTRUM spect  
PROBHD Z75813\_0011 (C  
PULPROG zgpg30  
TD 65536  
SOLVENT CDCl3  
NS 33  
DS 4  
SWH 42613.637 Hz  
FIDRES 1.300465 Hz  
AQ 0.7690057 sec  
RG 203  
DW 11.733 usec  
DE 18.00 usec  
TE 298.0 K  
D1 2.00000000 sec  
D11 0.03000000 sec  
TD0 1  
SFO1 176.0880661 MHz  
NUC1 13C  
P0 4.00 usec  
P1 12.00 usec  
SI 32768  
SF 176.0704590 MHz  
WDW EM  
SSB 0  
LB 1.00 Hz  
GB 0  
PC 1.40

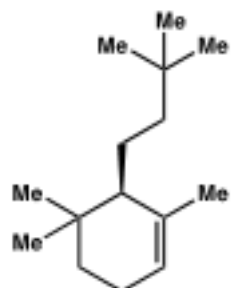

14: C<sub>15</sub>H<sub>28</sub>  
MW: 208.39

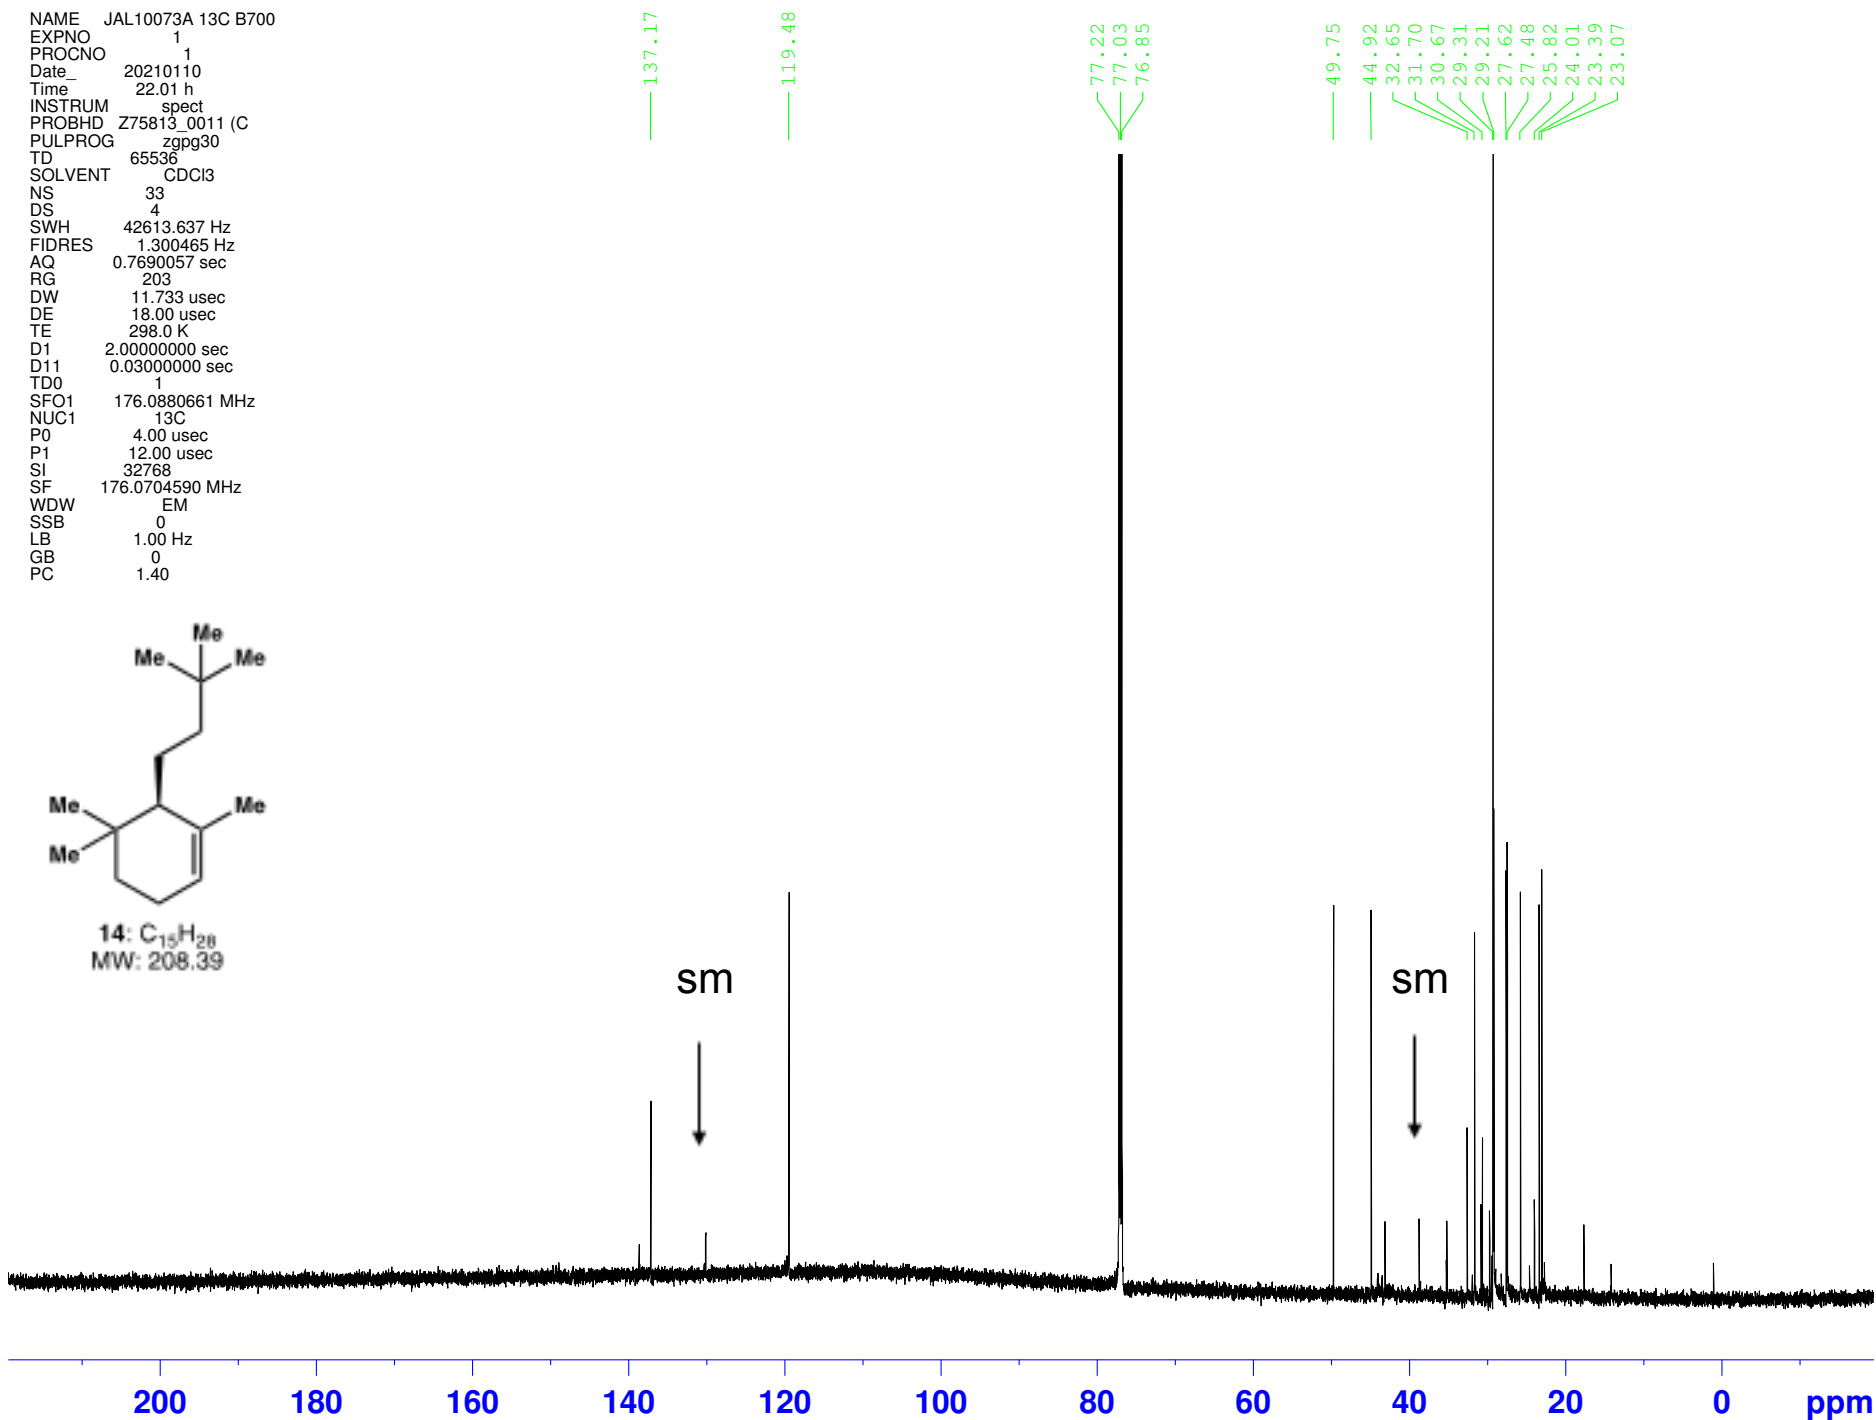

NAME JAL10088A 1H  
 EXPNO 1  
 PROCNO 1  
 Date\_ 20210115  
 Time 13.03 h  
 INSTRUM spect  
 PROBHD Z108618\_0106 (  
 PULPROG zg30  
 TD 65536  
 SOLVENT CDCl3  
 NS 16  
 DS 2  
 SWH 8012.820 Hz  
 FIDRES 0.244532 Hz  
 AQ 4.0894966 sec  
 RG 32  
 DW 62.400 usec  
 DE 16.92 usec  
 TE 297.7 K  
 D1 1.00000000 sec  
 TD0 1  
 SFO1 400.1724710 MHz  
 NUC1 1H  
 P0 5.00 usec  
 P1 15.00 usec  
 SI 65536  
 SF 400.1700127 MHz  
 WDW EM  
 SSB 0  
 LB 0.30 Hz  
 GB 0  
 PC 1.00

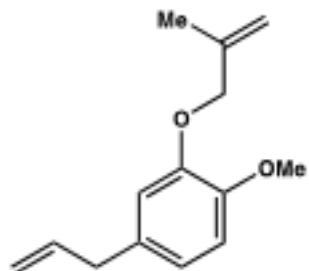

**15: C<sub>14</sub>H<sub>18</sub>O<sub>2</sub>**  
 MW: 218.30

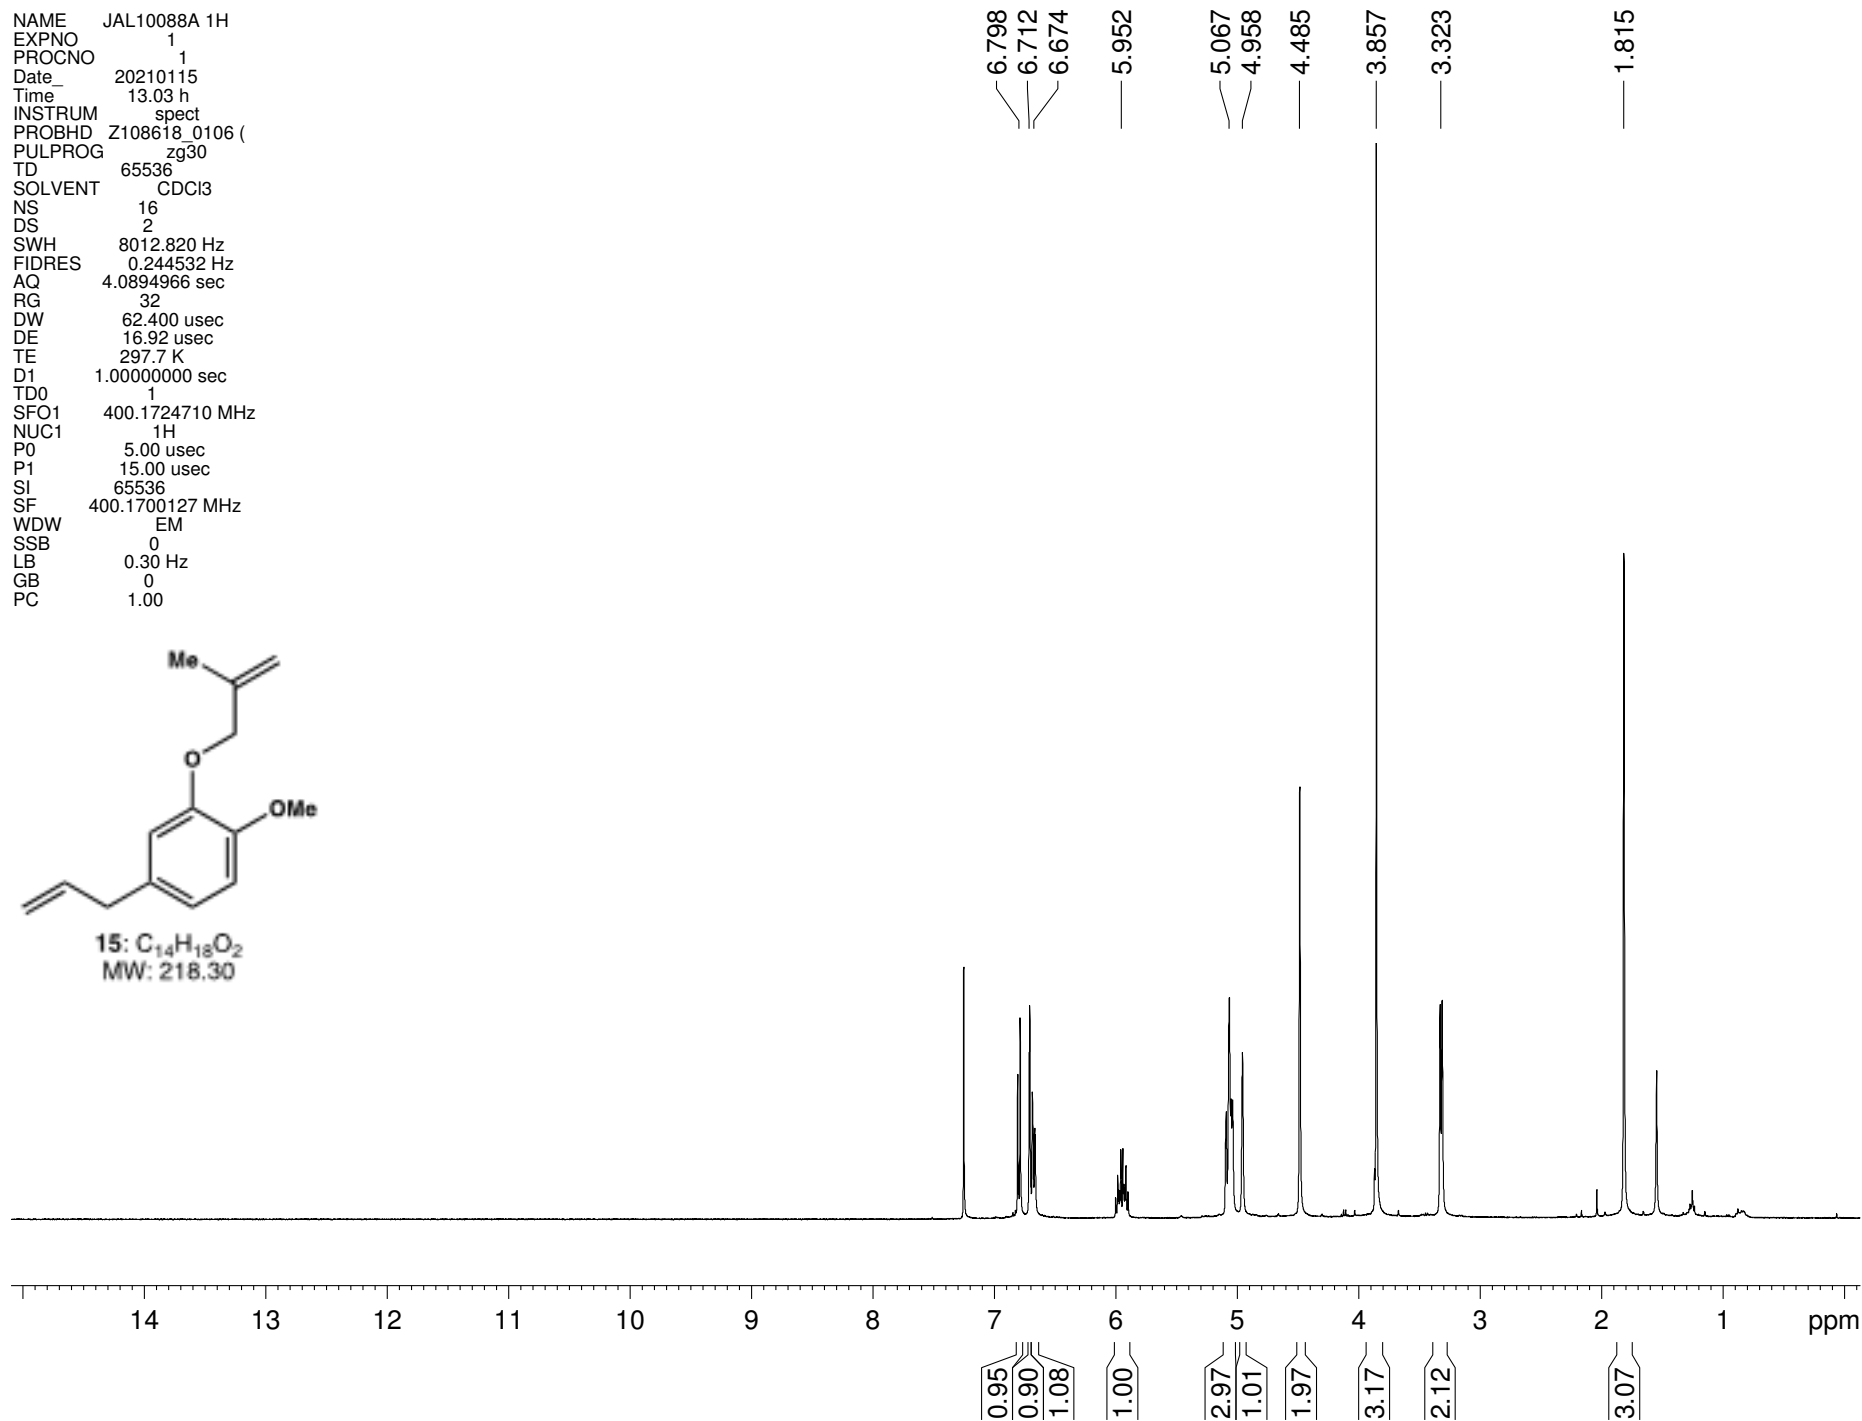

NAME JAL10172B 1H  
 EXPNO 2  
 PROCNO 1  
 Date\_ 20210223  
 Time 12.57 h  
 INSTRUM spect  
 PROBHD Z108618\_0106 (  
 PULPROG zg30  
 TD 65536  
 SOLVENT CDCl3  
 NS 16  
 DS 2  
 SWH 8012.820 Hz  
 FIDRES 0.244532 Hz  
 AQ 4.0894966 sec  
 RG 203  
 DW 62.400 usec  
 DE 16.92 usec  
 TE 297.7 K  
 D1 1.00000000 sec  
 TD0 1  
 SFO1 400.1724710 MHz  
 NUC1 1H  
 P0 5.00 usec  
 P1 15.00 usec  
 SI 65536  
 SF 400.1700110 MHz  
 WDW EM  
 SSB 0  
 LB 0.30 Hz  
 GB 0  
 PC 1.00

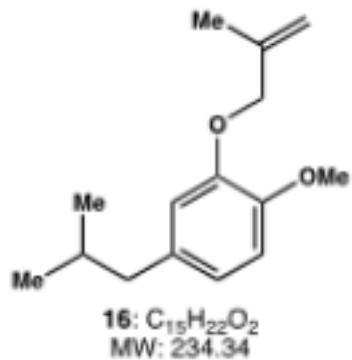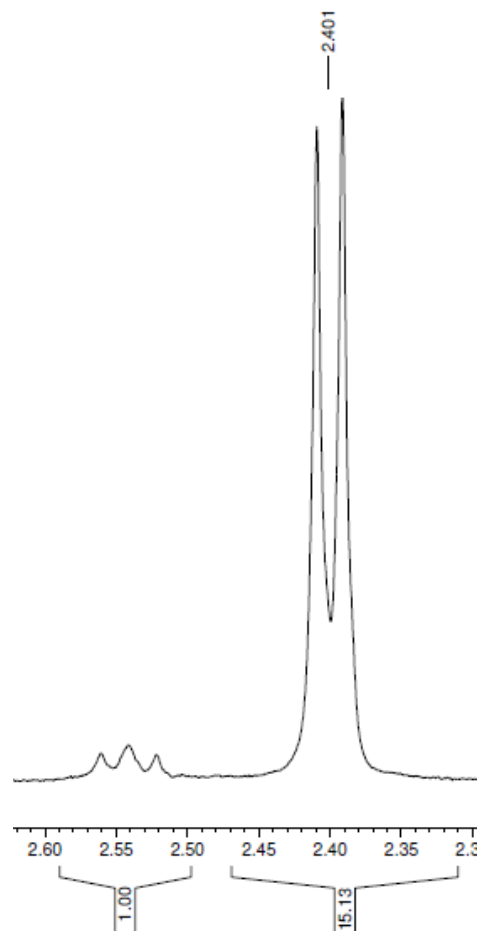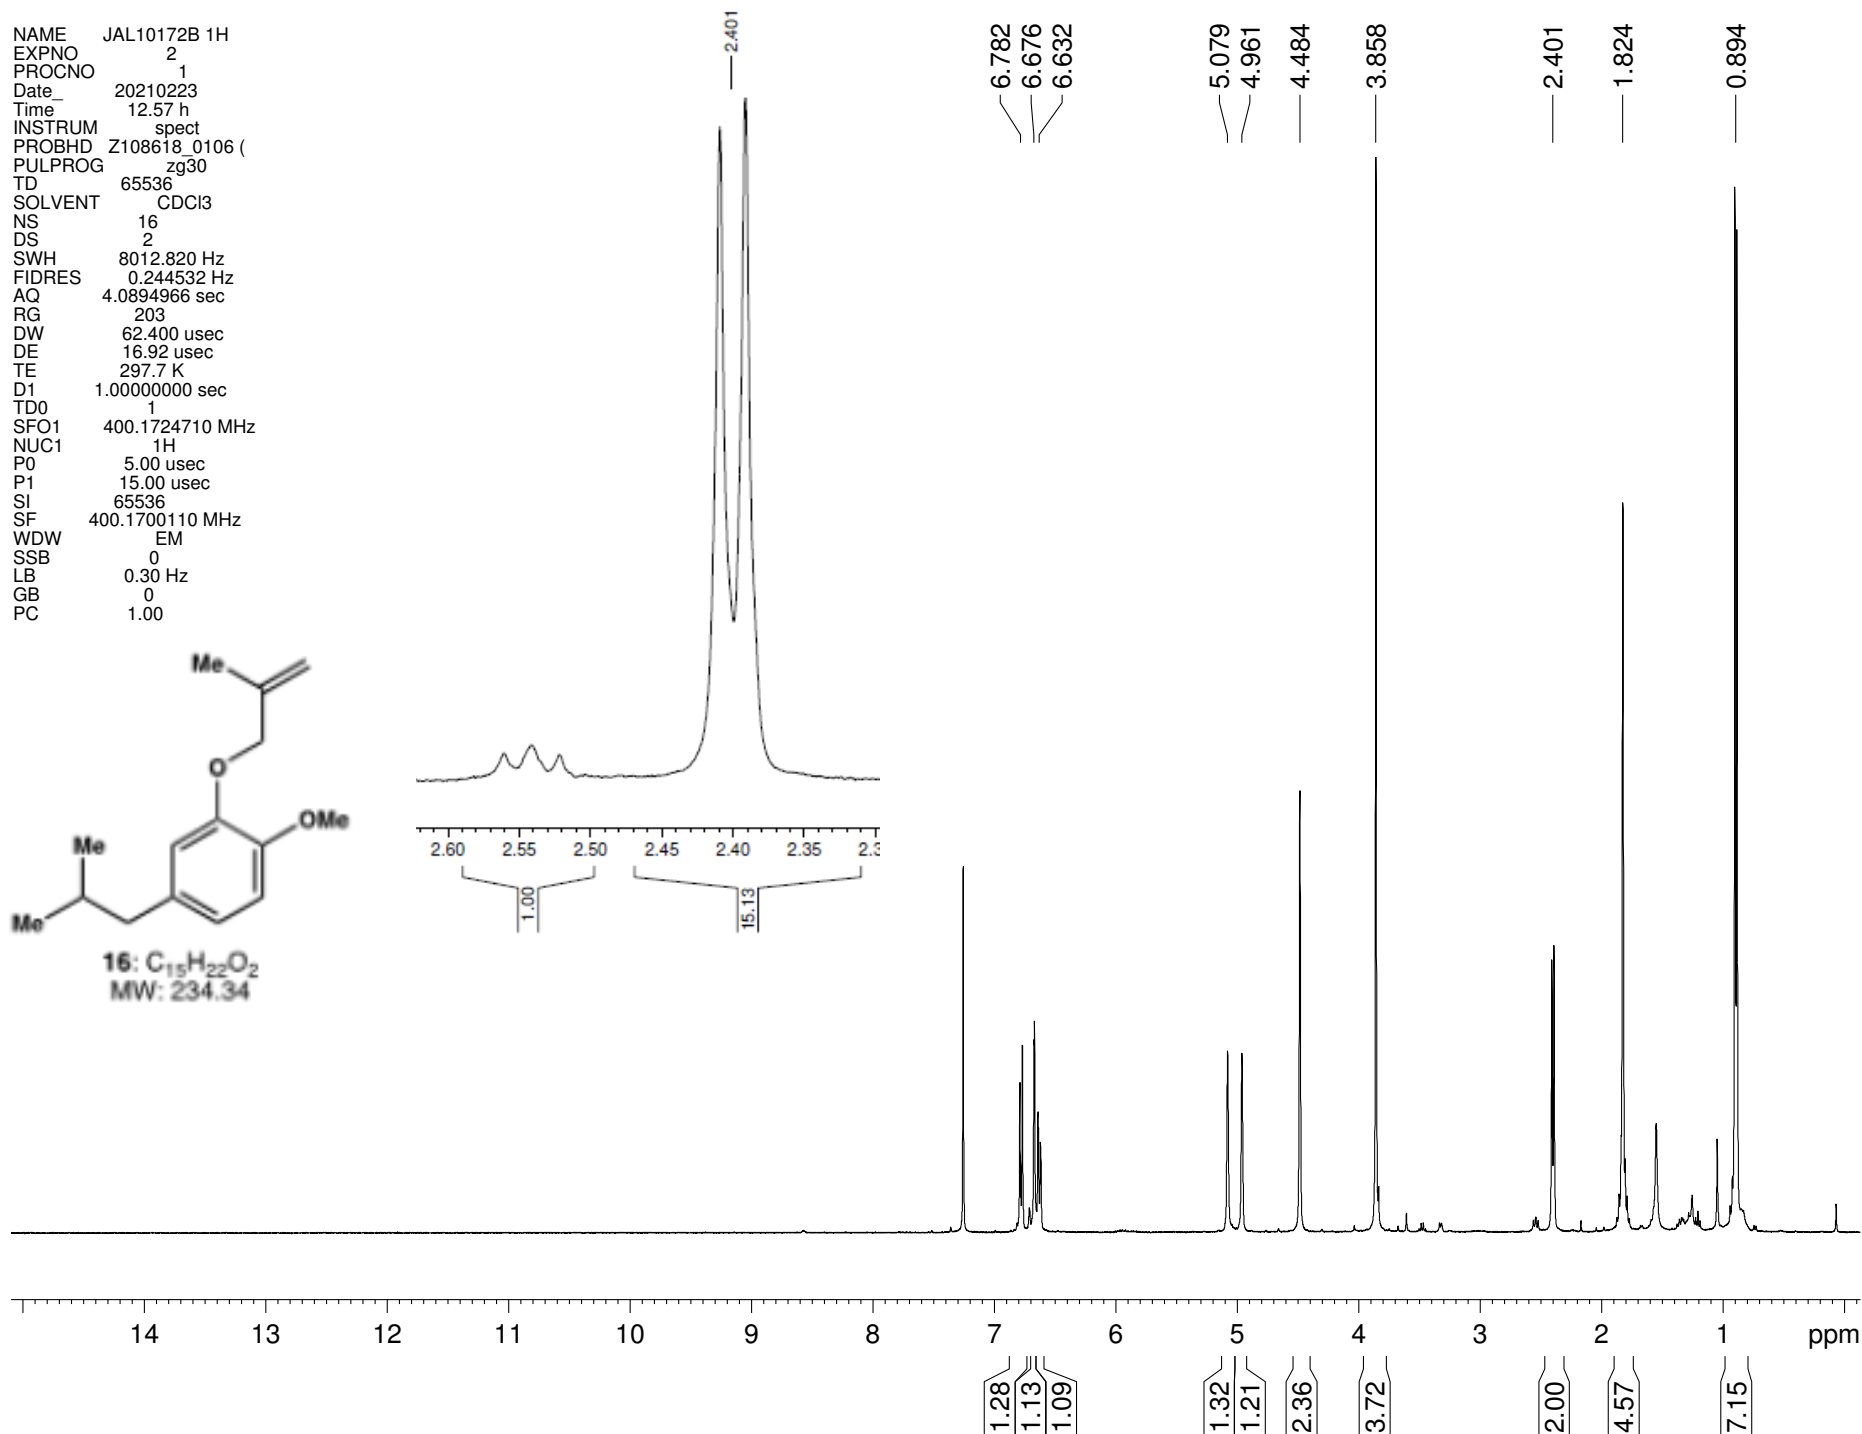

NAME JAL10093A" 13C B600  
 EXPNO 1  
 PROCNO 1  
 Date\_ 20210201  
 Time 13.07 h  
 INSTRUM spect  
 PROBHD Z814601\_0054 (  
 PULPROG zgpg30  
 TD 65536  
 SOLVENT CDCl3  
 NS 516  
 DS 4  
 SWH 36231.883 Hz  
 FIDRES 1.105709 Hz  
 AQ 0.9044468 sec  
 RG 203  
 DW 13.800 usec  
 DE 6.50 usec  
 TE 298.1 K  
 D1 2.00000000 sec  
 D11 0.03000000 sec  
 TD0 1  
 SFO1 150.9178988 MHz  
 NUC1 13C  
 P0 3.33 usec  
 P1 10.00 usec  
 SI 32768  
 SF 150.9028090 MHz  
 WDW EM  
 SSB 0  
 LB 1.00 Hz  
 GB 0  
 PC 1.40

149.17  
 146.32  
 141.16  
 134.82  
 120.98  
 113.57  
 112.99  
 112.45  
 72.90  
 55.98  
 45.09  
 30.32  
 22.37  
 19.36

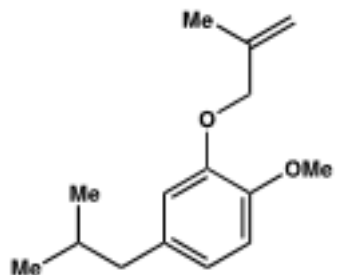

**16:** C<sub>15</sub>H<sub>22</sub>O<sub>2</sub>  
 MW: 234.34

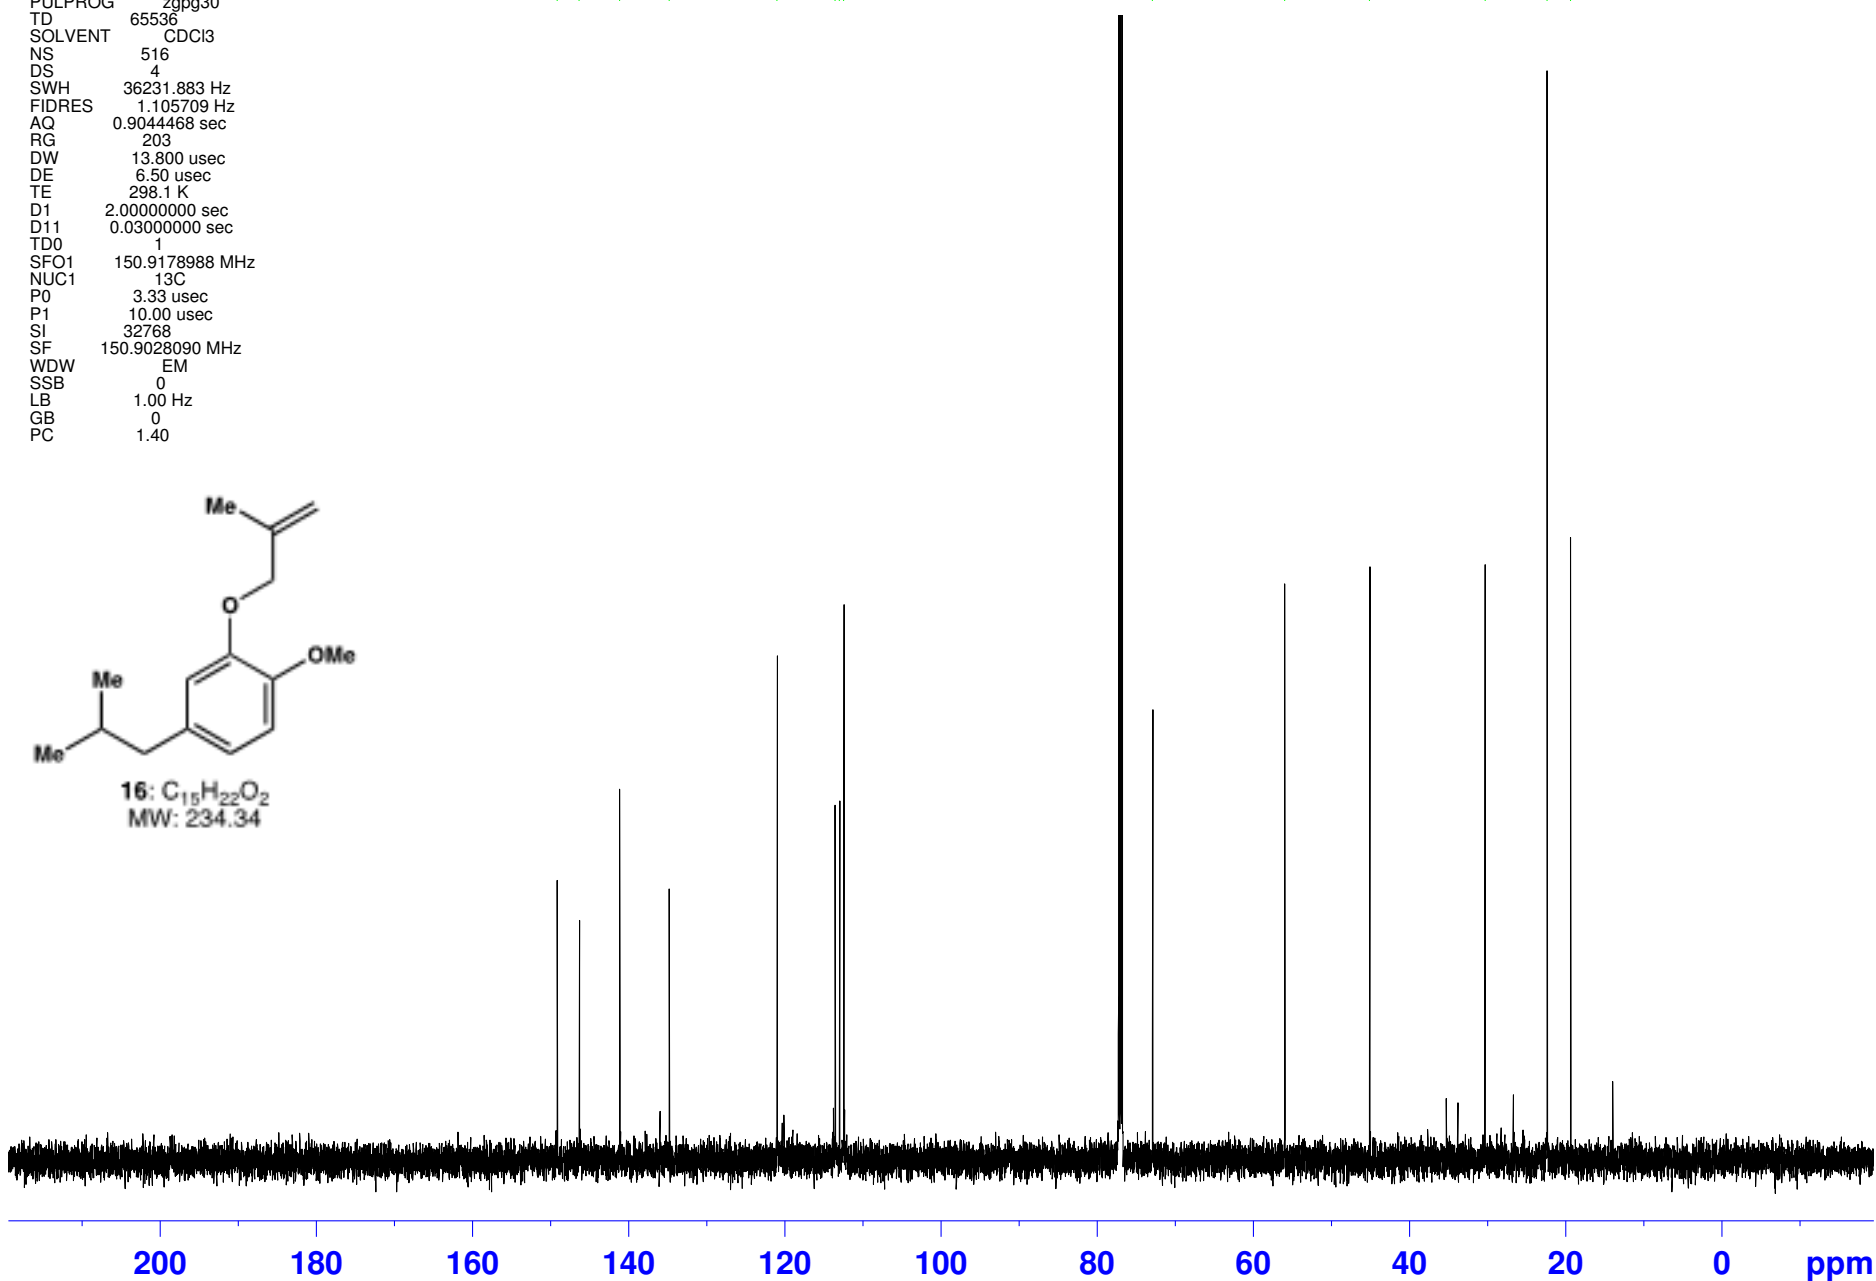

NAME JAL10045A 1H  
EXPNO 1  
PROCNO 1  
Date\_ 20201219  
Time 14.02 h  
INSTRUM spect  
PROBHD Z108618\_0106 (  
PULPROG zg30  
TD 65536  
SOLVENT CDCl3  
NS 16  
DS 2  
SWH 8012.820 Hz  
FIDRES 0.244532 Hz  
AQ 4.0894966 sec  
RG 203  
DW 62.400 usec  
DE 16.92 usec  
TE 297.8 K  
D1 1.00000000 sec  
TD0 1  
SFO1 400.1724710 MHz  
NUC1 1H  
P0 5.00 usec  
P1 15.00 usec  
SI 65536  
SF 400.1700131 MHz  
WDW EM  
SSB 0  
LB 0.30 Hz  
GB 0  
PC 1.00

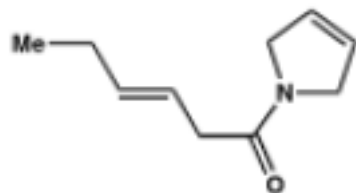

17: C<sub>10</sub>H<sub>15</sub>NO  
MW: 165.24

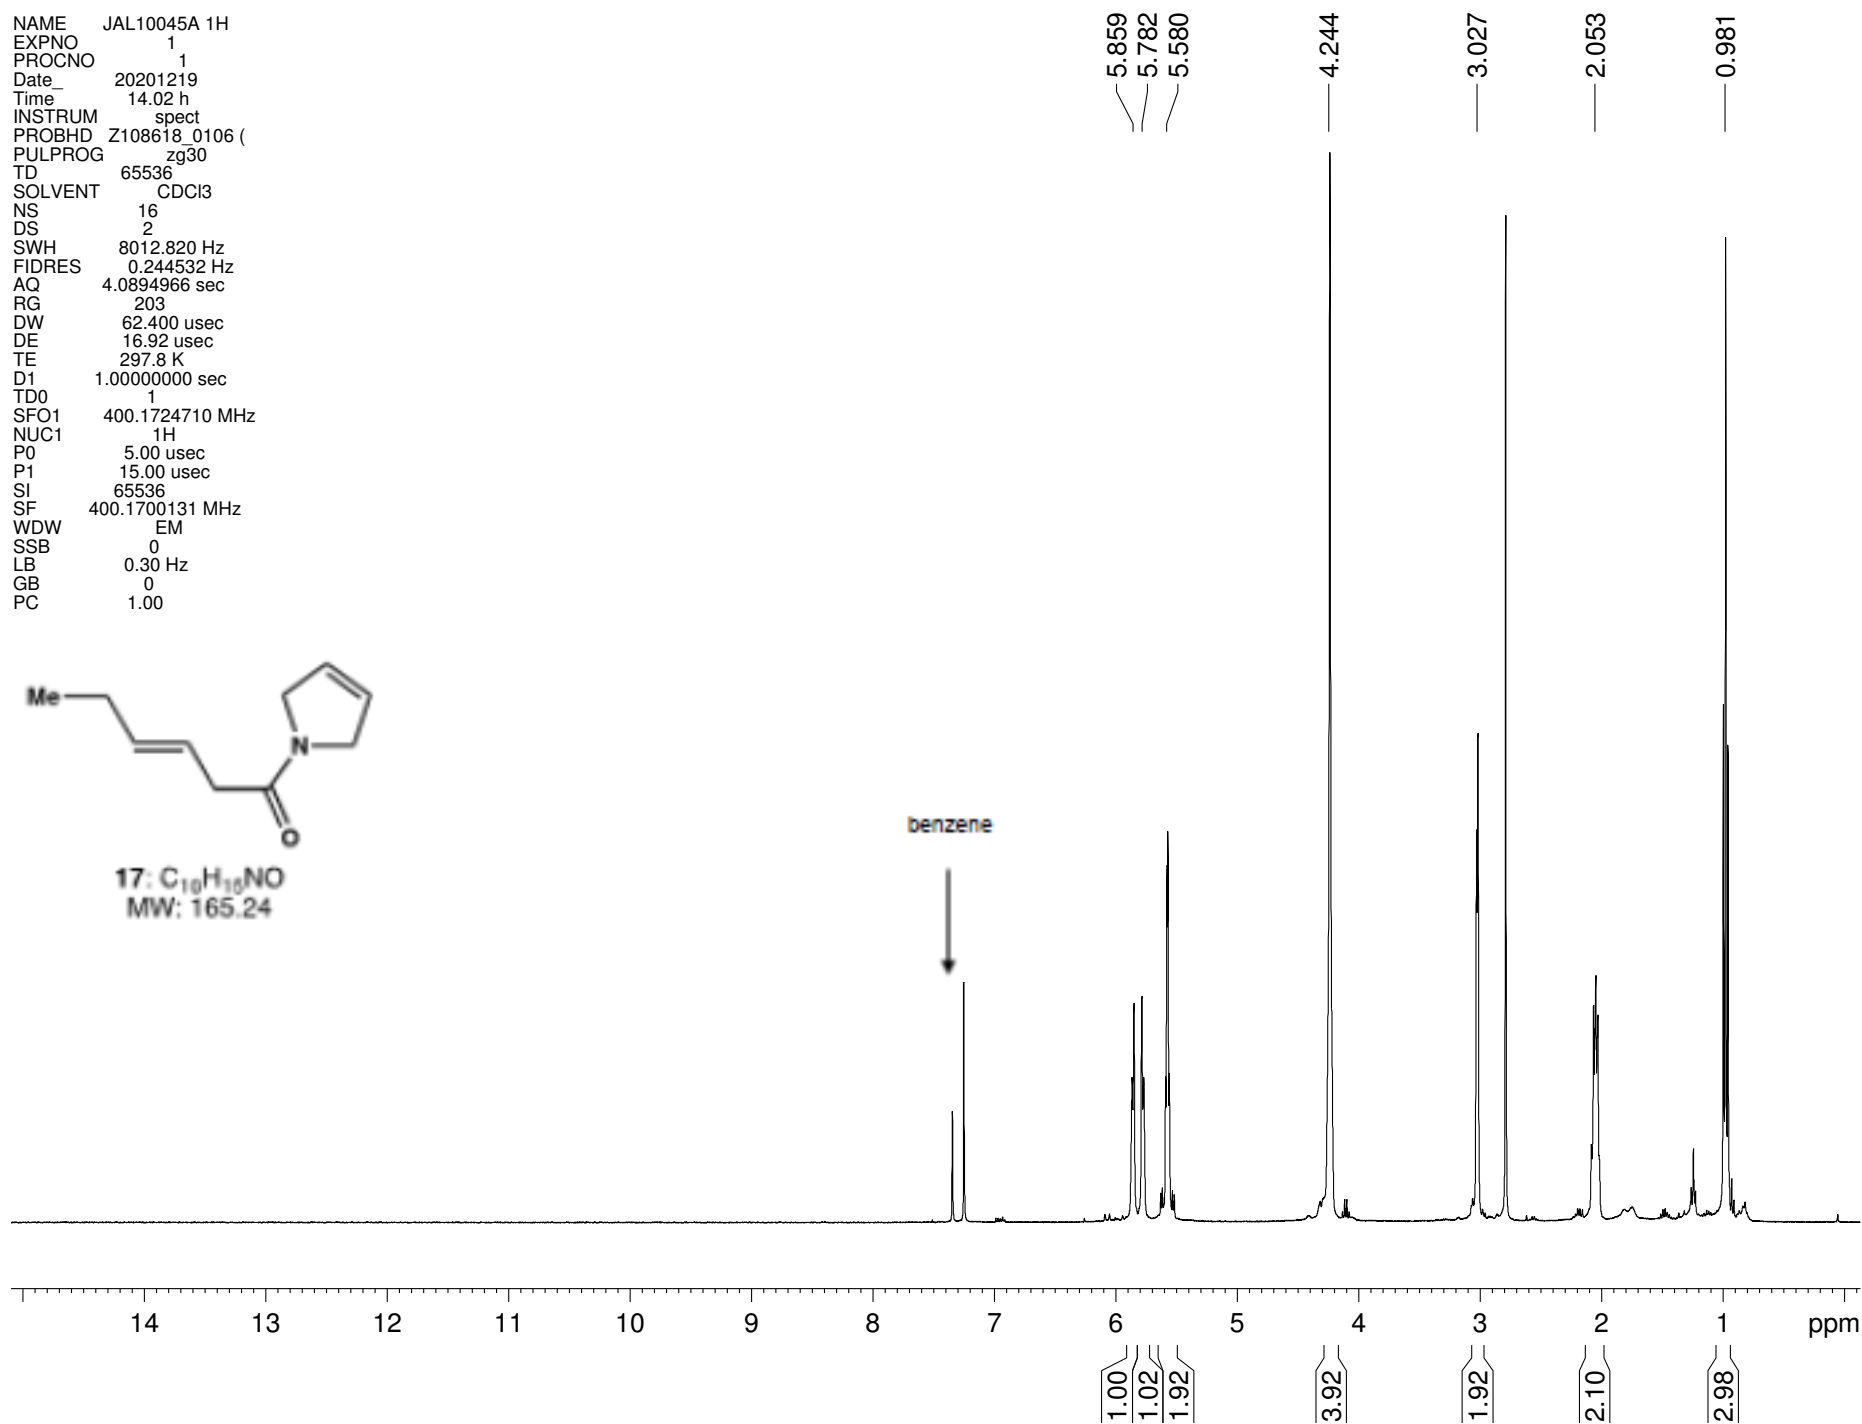

NAME JAL10045A 13C B700  
EXPNO 1  
PROCNO 1  
Date\_ 20210110  
Time 23.04 h  
INSTRUM spect  
PROBHD Z75813\_0011 (C  
PULPROG zgpg30  
TD 65536  
SOLVENT CDCl3  
NS 1024  
DS 4  
SWH 42613.637 Hz  
FIDRES 1.300465 Hz  
AQ 0.7690057 sec  
RG 203  
DW 11.733 usec  
DE 18.00 usec  
TE 298.0 K  
D1 2.00000000 sec  
D11 0.03000000 sec  
TD0 1  
SFO1 176.0880661 MHz  
NUC1 13C  
P0 4.00 usec  
P1 12.00 usec  
SI 32768  
SF 176.0704590 MHz  
WDW EM  
SSB 0  
LB 1.00 Hz  
GB 0  
PC 1.40

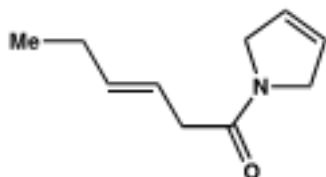

17: C<sub>10</sub>H<sub>15</sub>NO  
MW: 165.24

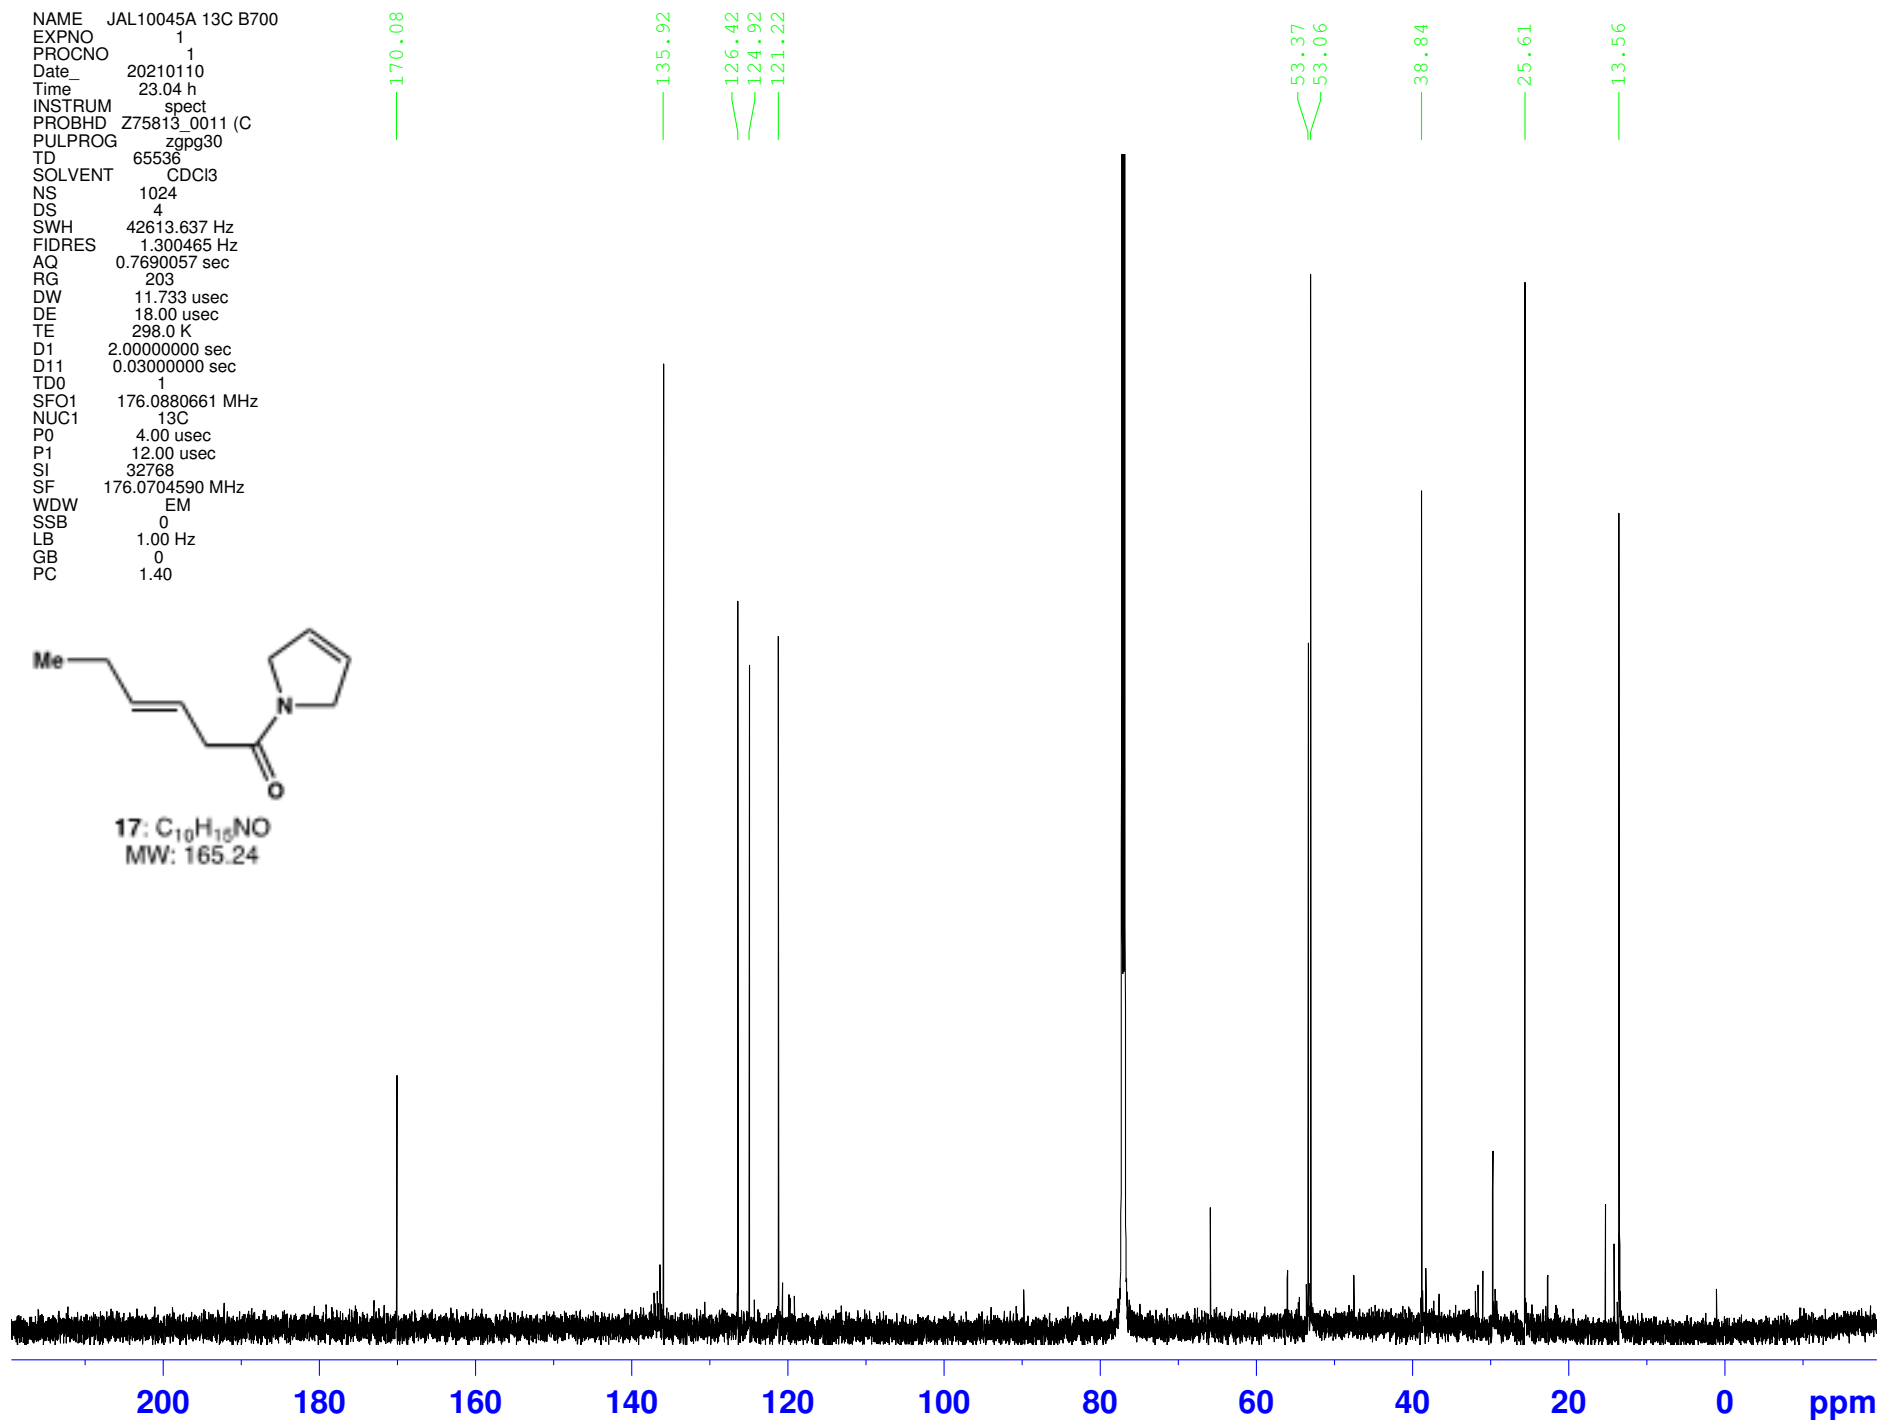

NAME JAL10164B' 1H B600  
 EXPNO 1  
 PROCNO 1  
 Date\_ 20210301  
 Time 8.45 h  
 INSTRUM spect  
 PROBHD Z814601\_0054 (  
 PULPROG zg30  
 TD 65536  
 SOLVENT CDCl3  
 NS 16  
 DS 2  
 SWH 12019.230 Hz  
 FIDRES 0.366798 Hz  
 AQ 2.7263477 sec  
 RG 203  
 DW 41.600 usec  
 DE 11.27 usec  
 TE 298.3 K  
 D1 1.00000000 sec  
 TD0 1  
 SFO1 600.1337058 MHz  
 NUC1 1H  
 P0 3.33 usec  
 P1 10.00 usec  
 SI 65536  
 SF 600.1300199 MHz  
 WDW EM  
 SSB 0  
 LB 0.30 Hz  
 GB 0  
 PC 1.00

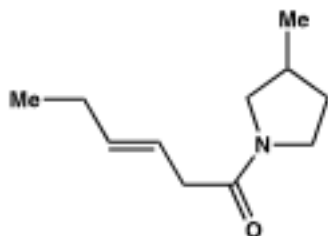

**18:** C<sub>11</sub>H<sub>19</sub>NO  
 MW: 181.28

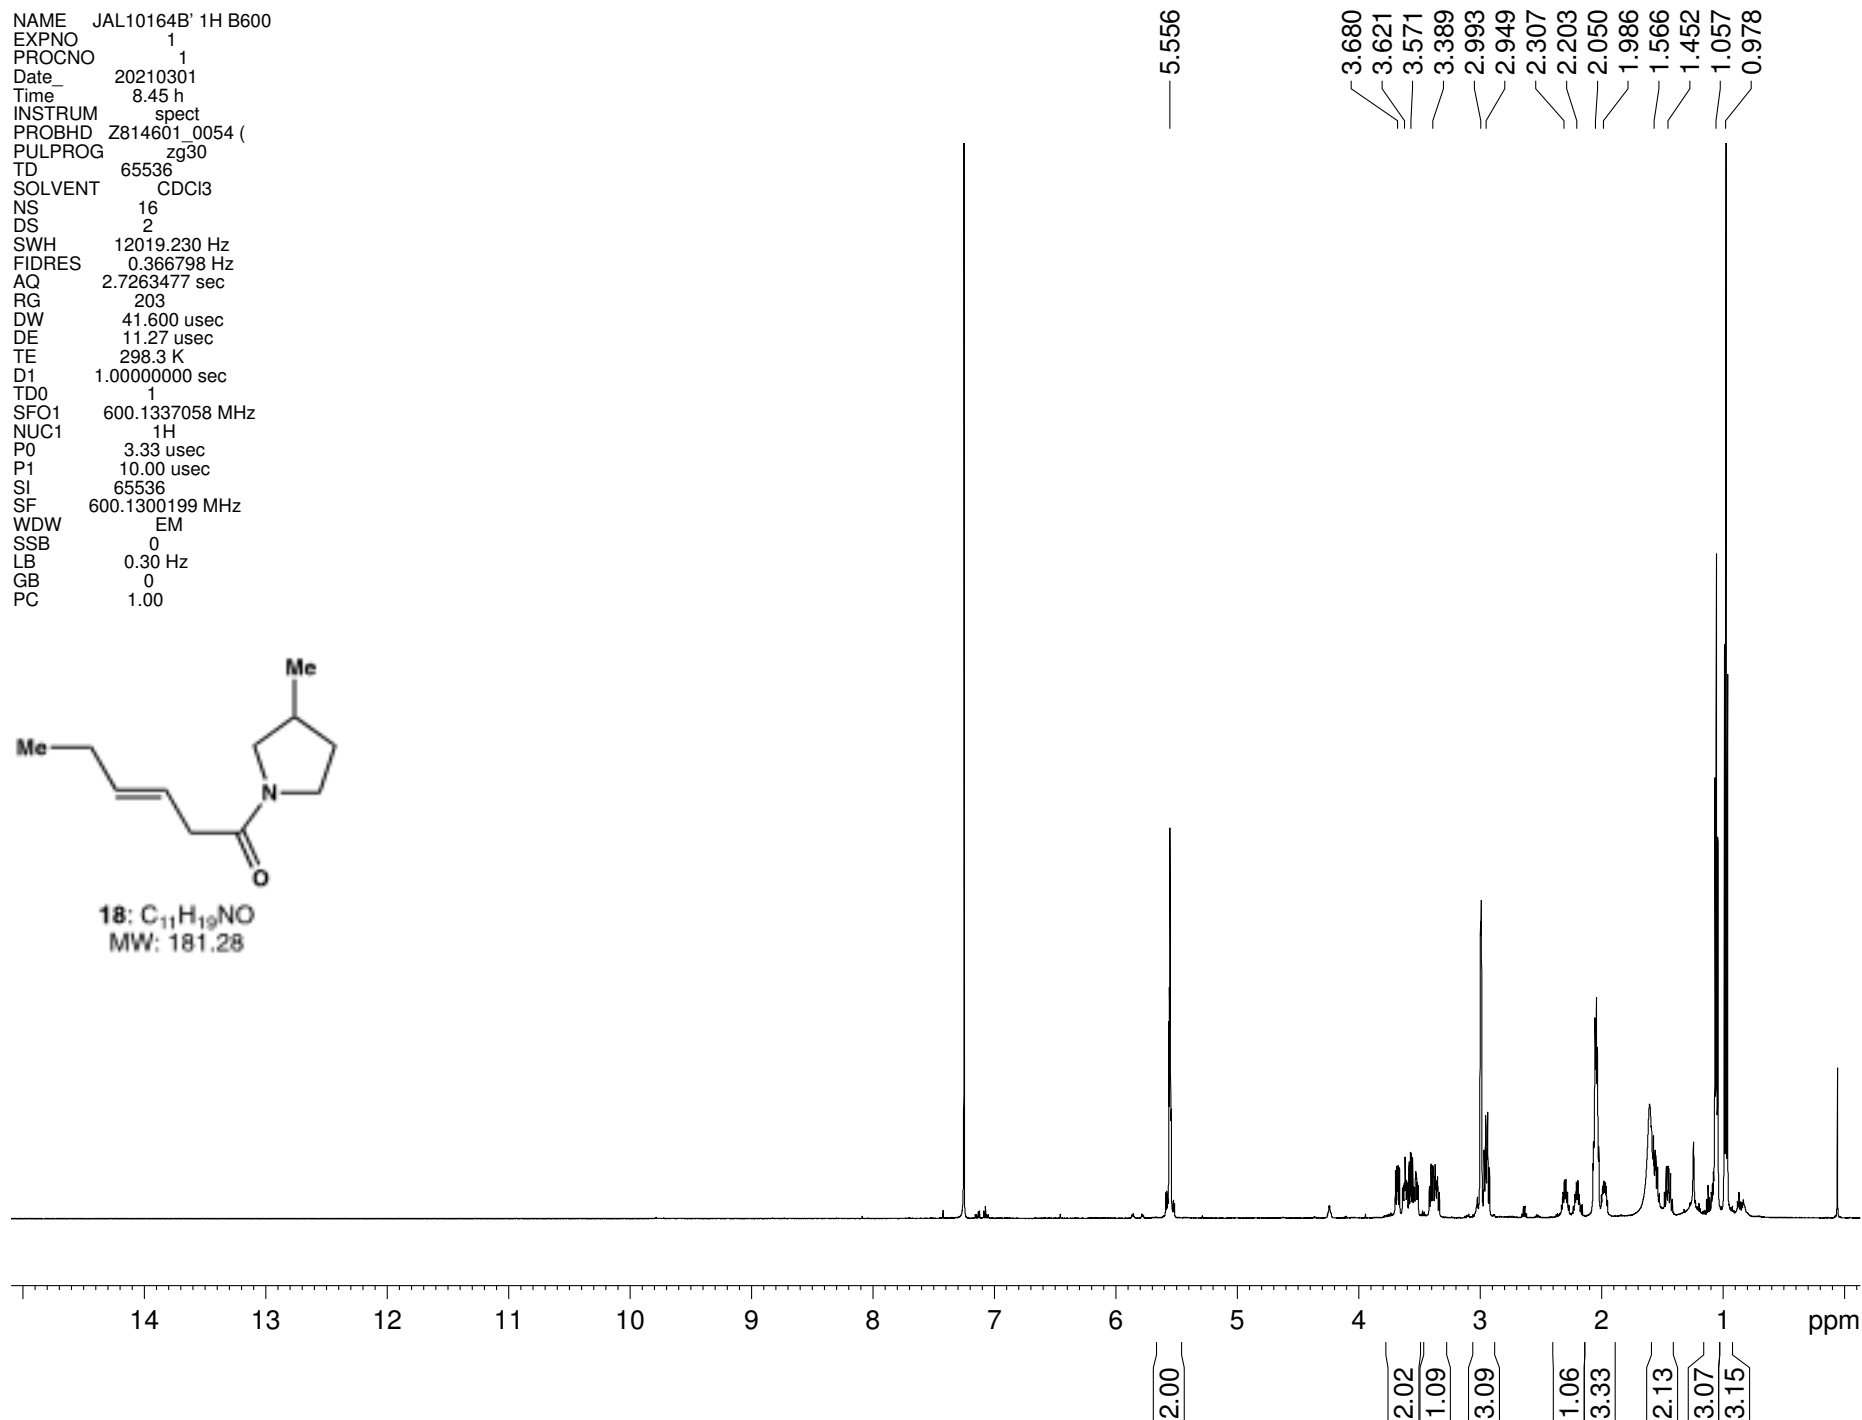



NAME JAL10164B 13C B600  
EXPNO 1  
PROCNO 1  
Date\_ 20210218  
Time 16.11 h  
INSTRUM spect  
PROBHD Z814601\_0054 (  
PULPROG zgpg30  
TD 65536  
SOLVENT CDCl3  
NS 2850  
DS 4  
SWH 36231.883 Hz  
FIDRES 1.105709 Hz  
AQ 0.9044468 sec  
RG 203  
DW 13.800 usec  
DE 6.50 usec  
TE 298.2 K  
D1 2.00000000 sec  
D11 0.03000000 sec  
TD0 1  
SFO1 150.9178988 MHz  
NUC1 13C  
P0 3.33 usec  
P1 10.00 usec  
SI 32768  
SF 150.9028090 MHz  
WDW EM  
SSB 0  
LB 1.00 Hz  
GB 0  
PC 1.40

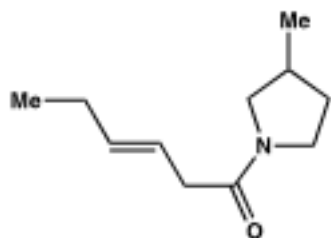

18: C<sub>11</sub>H<sub>19</sub>NO  
MW: 181.28

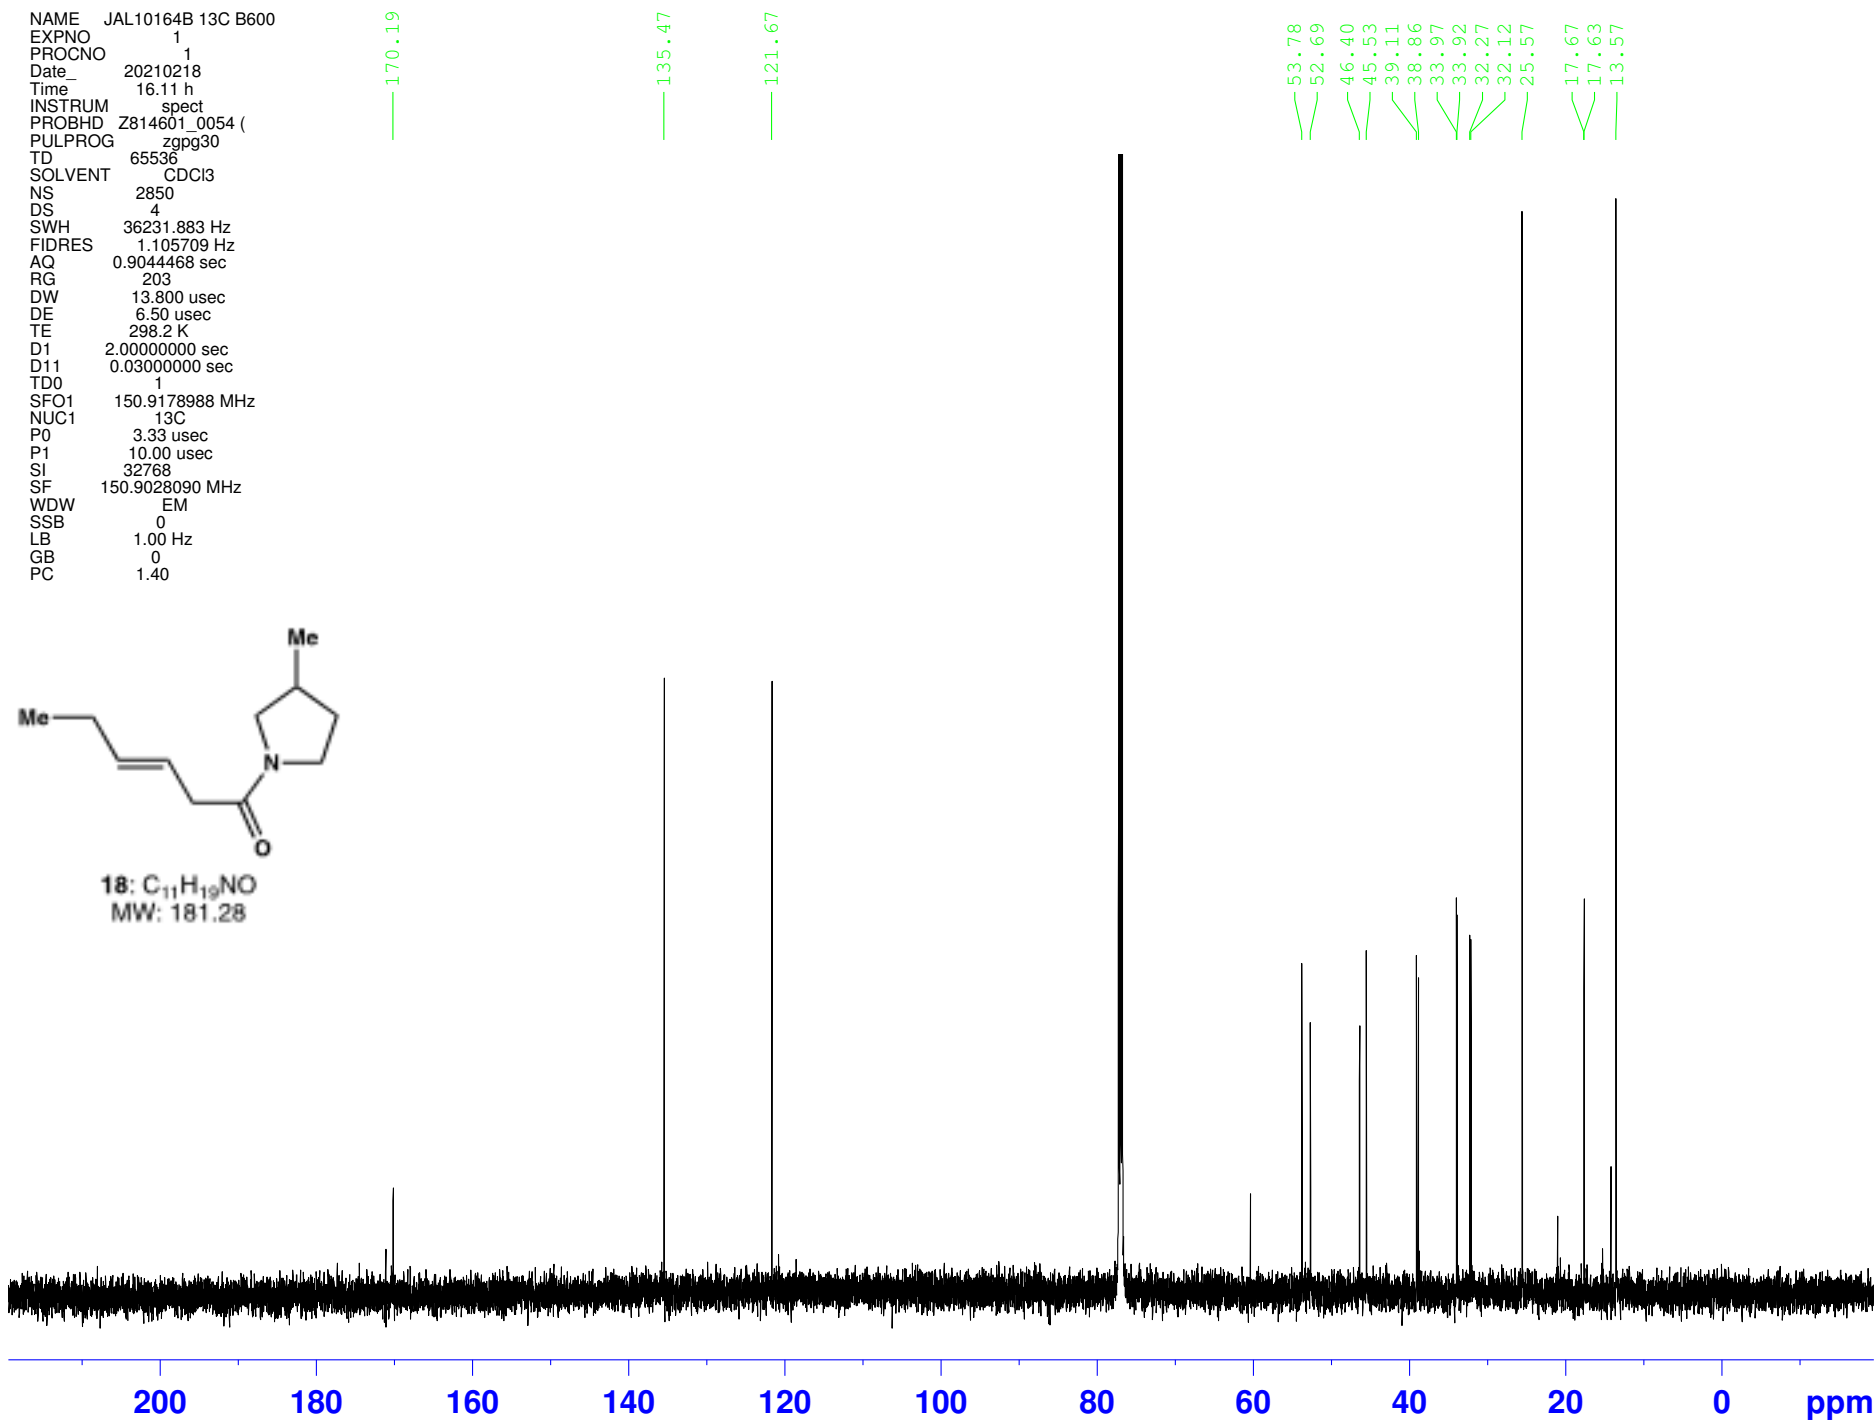

NAME JAL10122A 1H  
EXPNO 2  
PROCNO 1  
Date\_ 20210202  
Time 8.55 h  
INSTRUM spect  
PROBHD Z108618\_0106 (  
PULPROG zg30  
TD 65536  
SOLVENT CDCl3  
NS 16  
DS 2  
SWH 8012.820 Hz  
FIDRES 0.244532 Hz  
AQ 4.0894966 sec  
RG 203  
DW 62.400 usec  
DE 16.92 usec  
TE 298.0 K  
D1 1.00000000 sec  
TD0 1  
SFO1 400.1724710 MHz  
NUC1 1H  
P0 5.00 usec  
P1 15.00 usec  
SI 65536  
SF 400.1700110 MHz  
WDW EM  
SSB 0  
LB 0.30 Hz  
GB 0  
PC 1.00

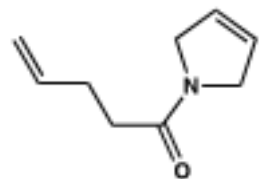

19: C<sub>9</sub>H<sub>13</sub>NO  
MW: 151.21

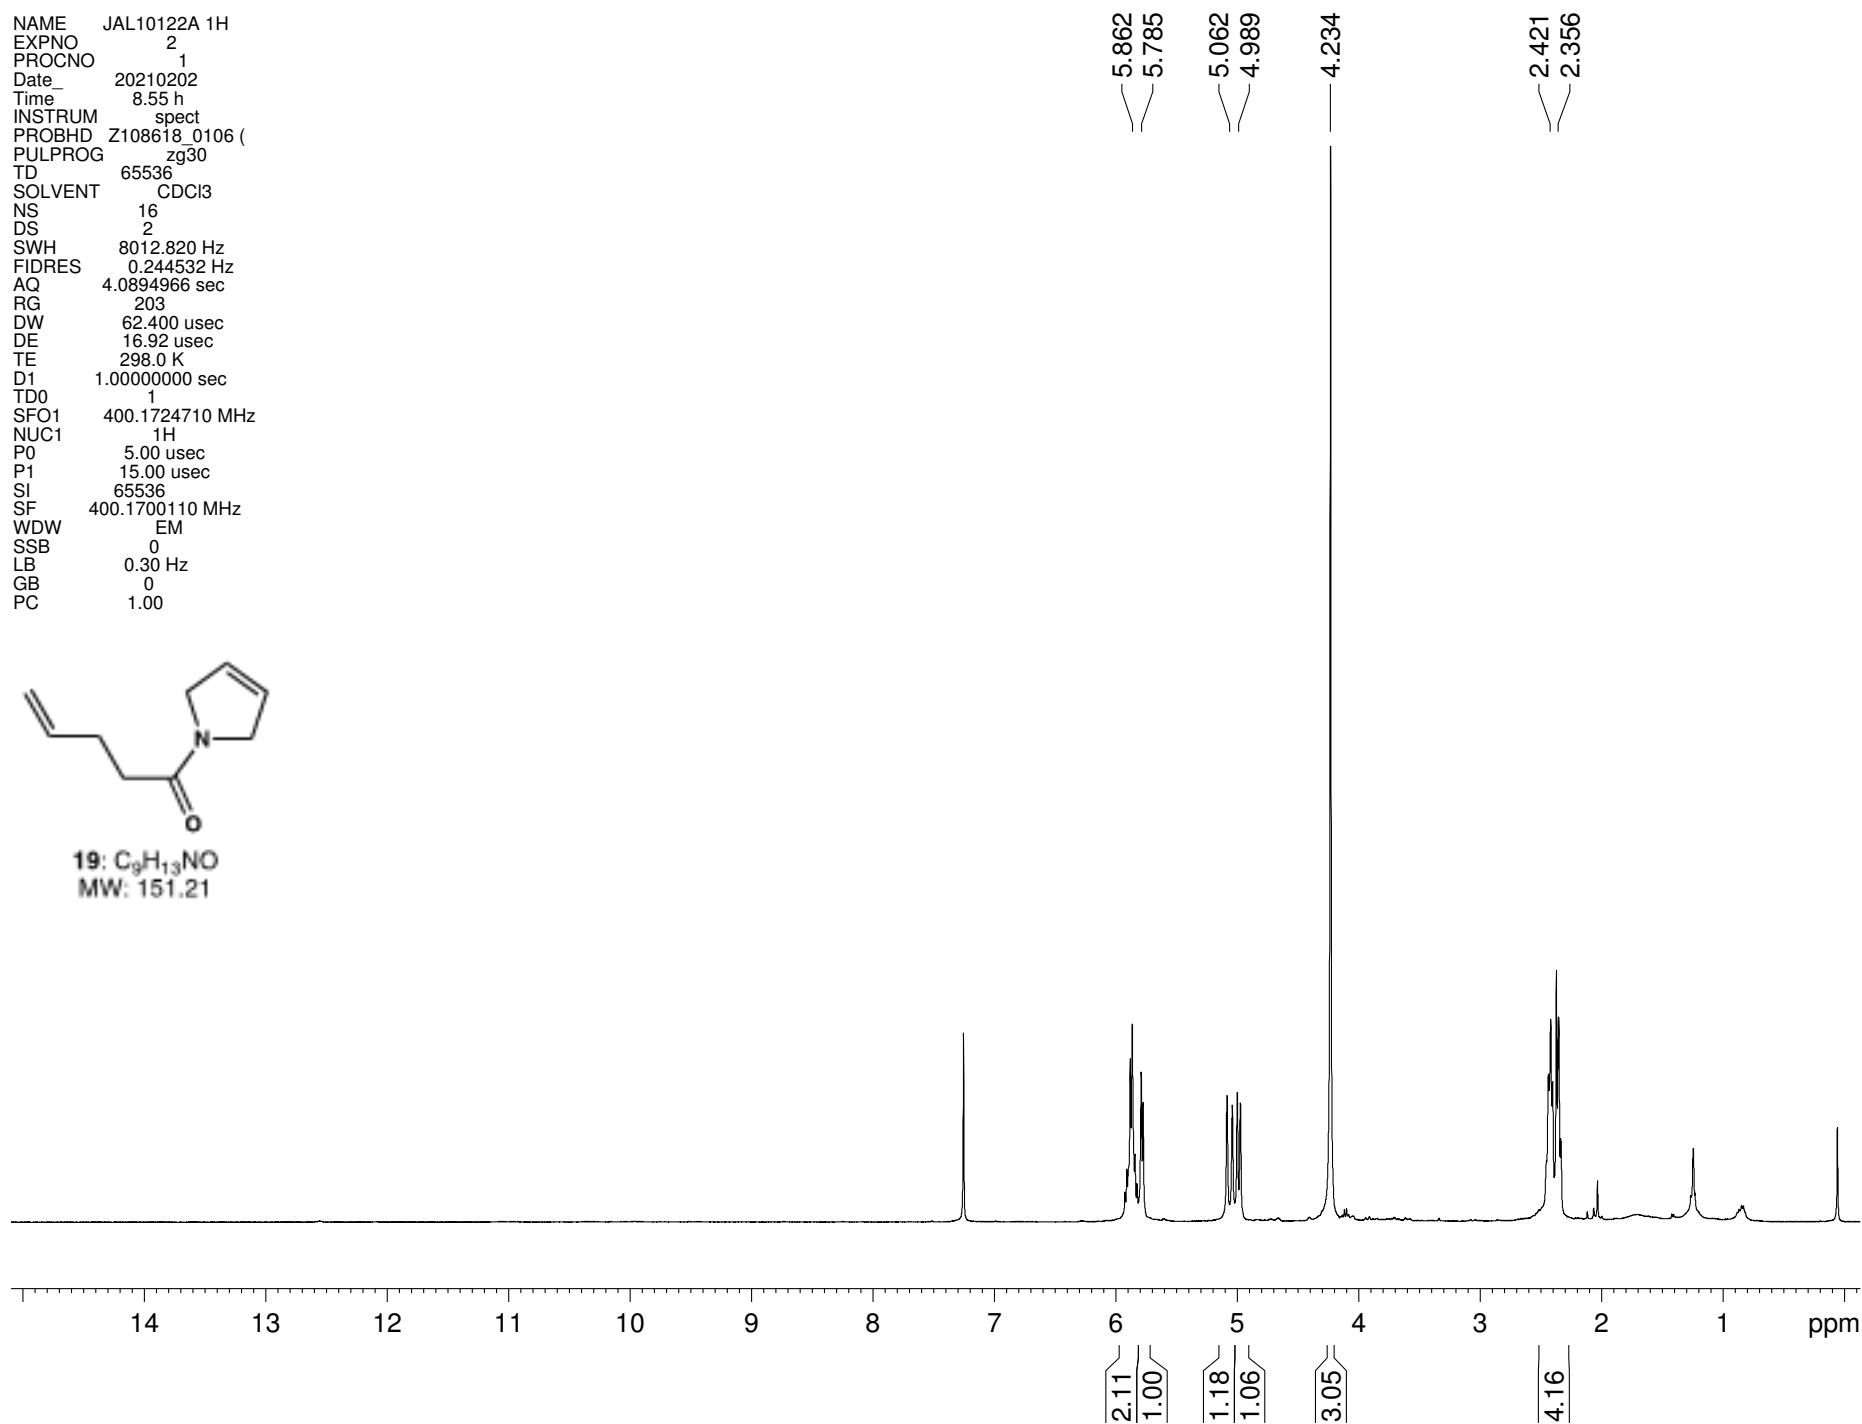

NAME JAL10122A 13C  
EXPNO 1  
PROCNO 1  
Date\_ 20210202  
Time\_ 9.30 h  
INSTRUM spect  
PROBHD Z108618\_0106 (  
PULPROG zgpg30  
TD 65536  
SOLVENT CDCl3  
NS 332  
DS 4  
SWH 24038.461 Hz  
FIDRES 0.733596 Hz  
AQ 1.3631988 sec  
RG 203  
DW 20.800 usec  
DE 6.50 usec  
TE 298.7 K  
D1 2.00000000 sec  
D11 0.03000000 sec  
TD0 1  
SFO1 100.6328888 MHz  
NUC1 13C  
P0 3.53 usec  
P1 10.60 usec  
SI 32768  
SF 100.6228280 MHz  
WDW EM  
SSB 0  
LB 1.00 Hz  
GB 0  
PC 1.40

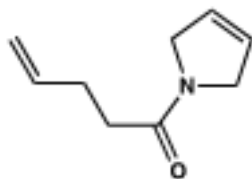

19: C<sub>9</sub>H<sub>13</sub>NO  
MW: 151.21

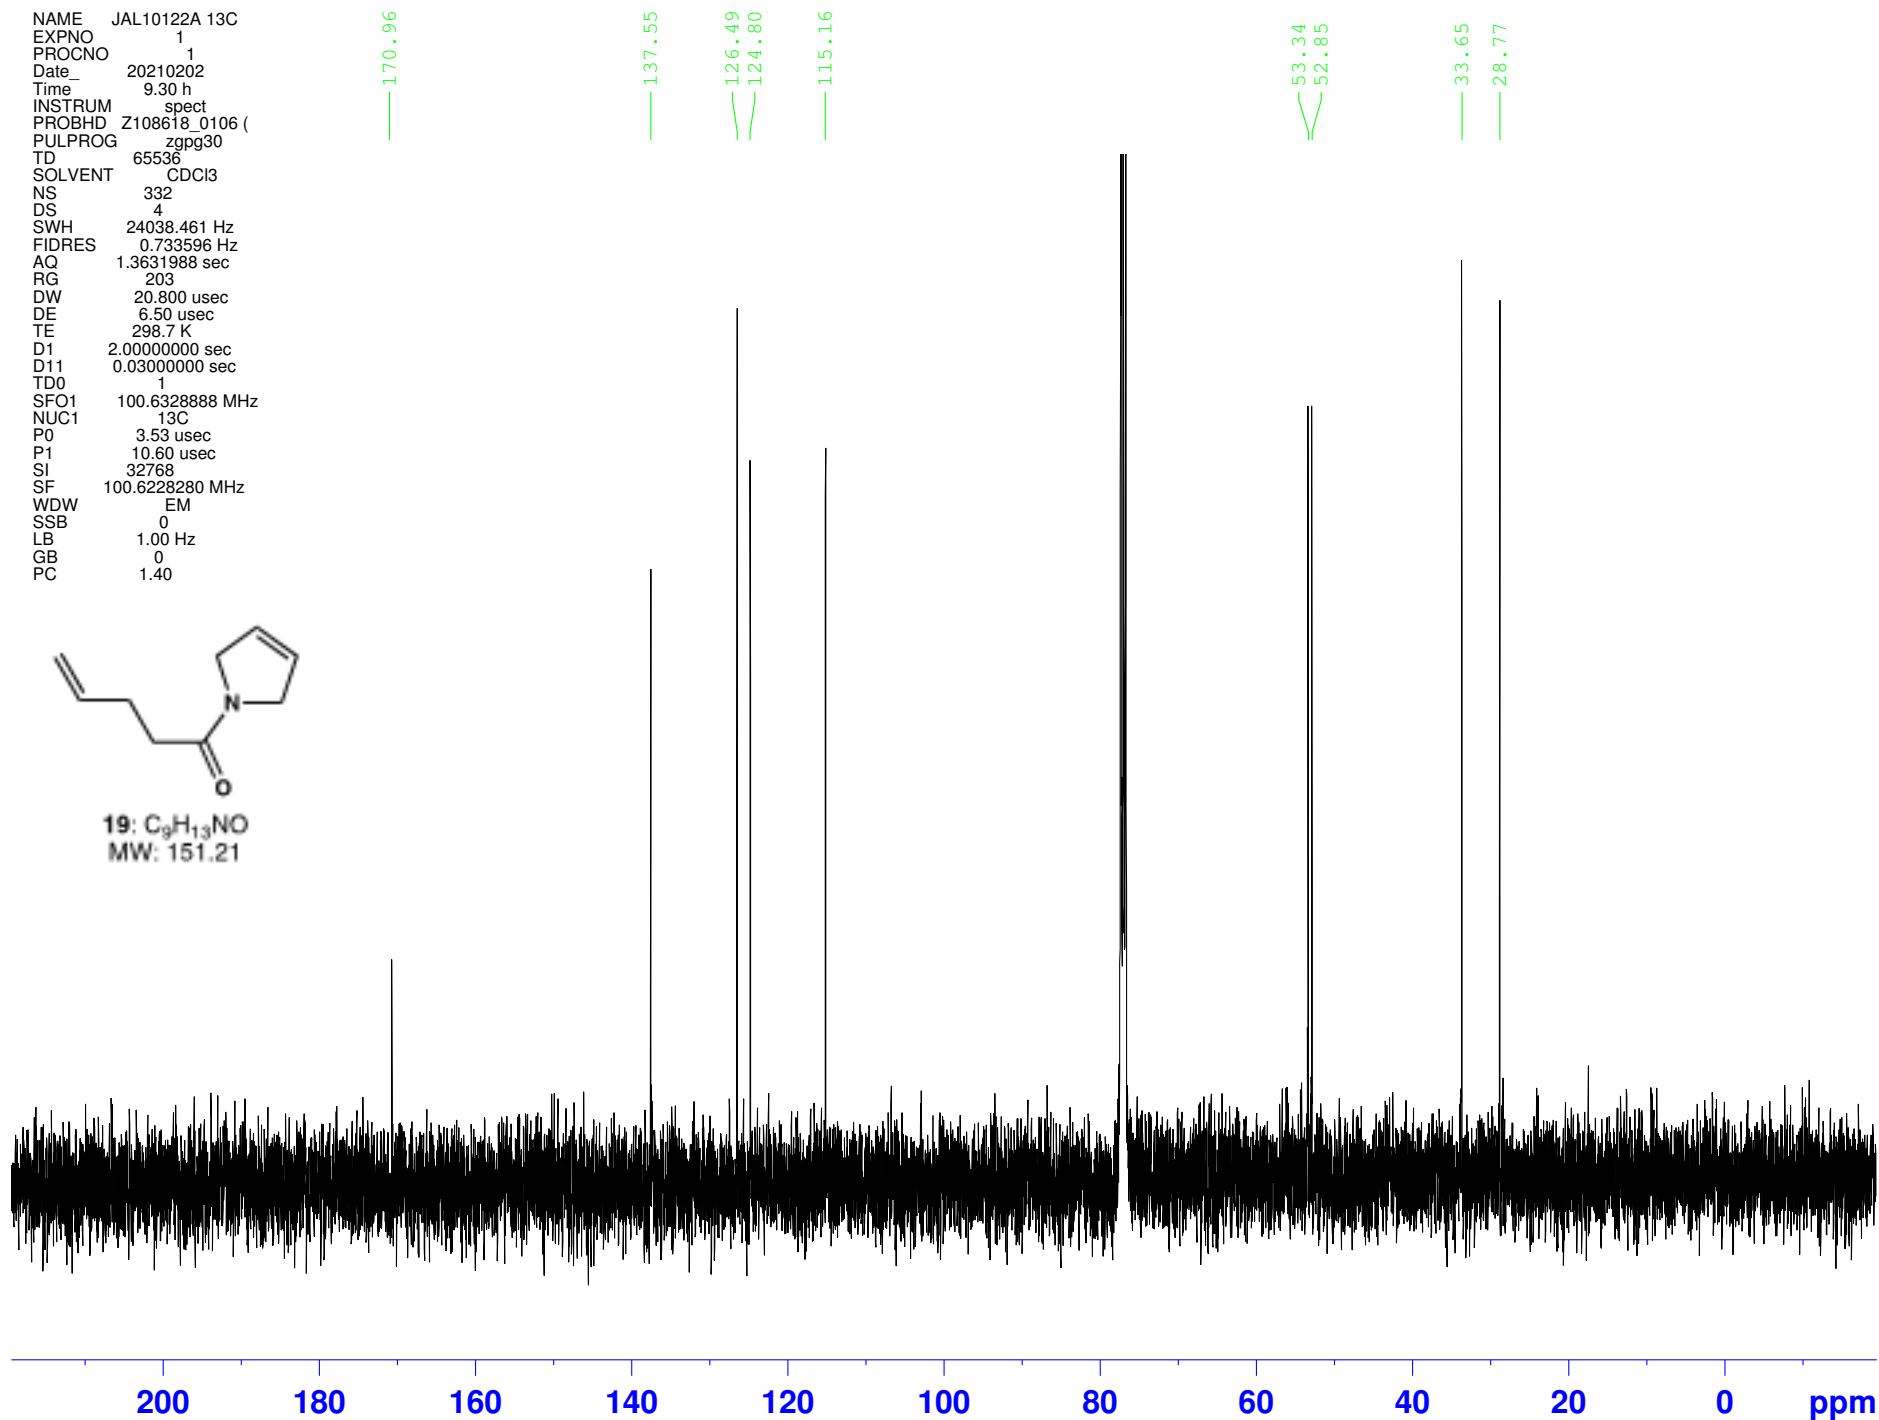

NAME JAL10142B-A 1H  
EXPNO 2  
PROCNO 1  
Date\_ 20210213  
Time 13.46 h  
INSTRUM spect  
PROBHD Z108618\_0106 (  
PULPROG zg30  
TD 65536  
SOLVENT CDCl3  
NS 16  
DS 2  
SWH 8012.820 Hz  
FIDRES 0.244532 Hz  
AQ 4.0894966 sec  
RG 203  
DW 62.400 usec  
DE 16.92 usec  
TE 297.9 K  
D1 1.00000000 sec  
TD0 1  
SFO1 400.1724710 MHz  
NUC1 1H  
P0 5.00 usec  
P1 15.00 usec  
SI 65536  
SF 400.1700000 MHz  
WDW EM  
SSB 0  
LB 0.30 Hz  
GB 0  
PC 1.00

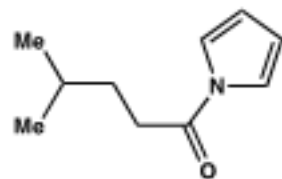

20: C<sub>10</sub>H<sub>15</sub>NO  
MW: 165.24

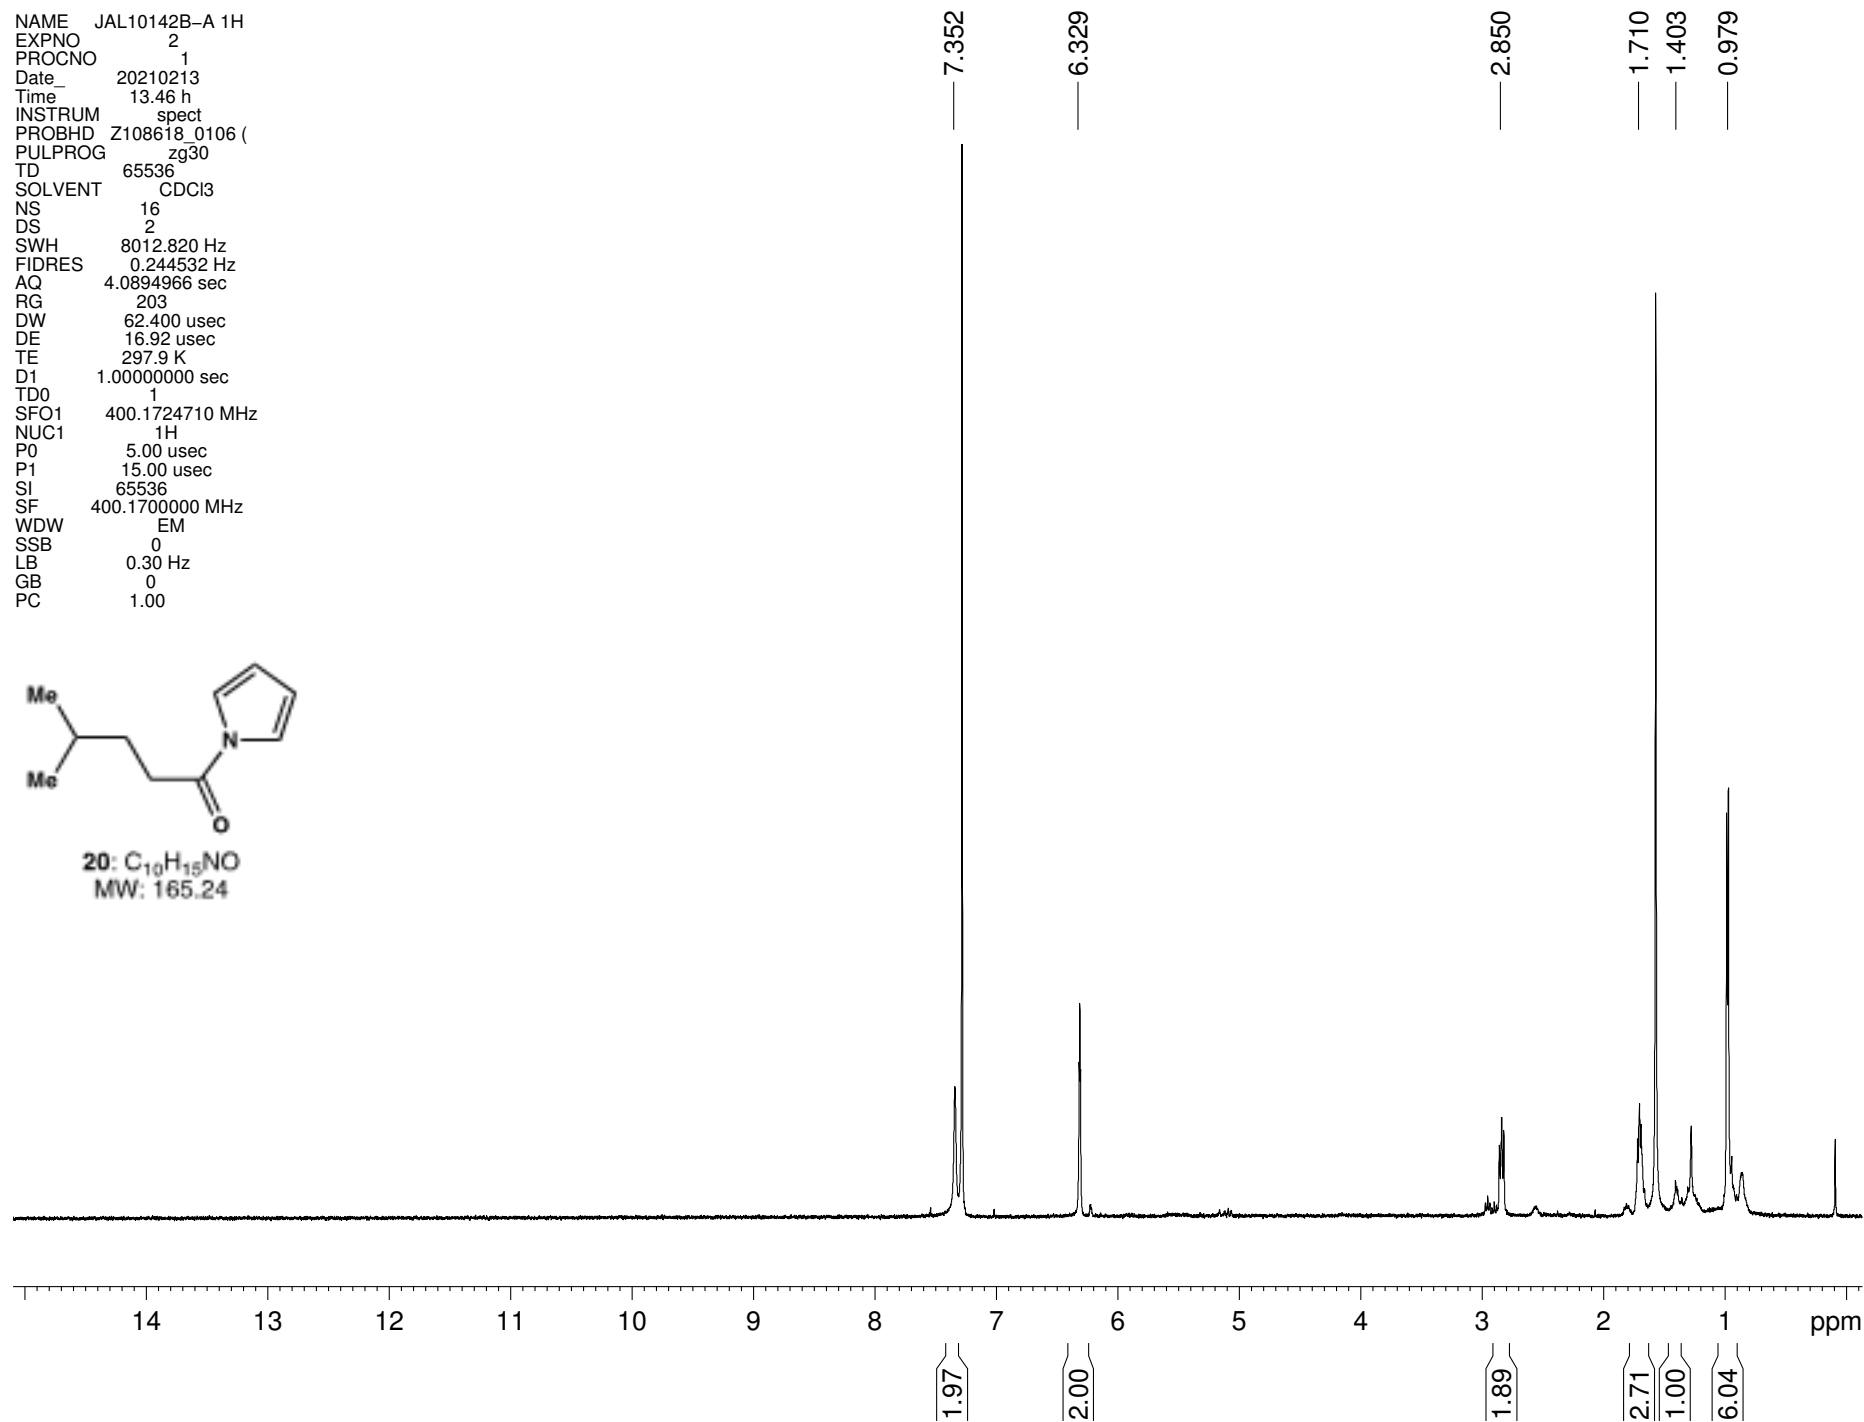

NAME JAL10142B-A 1H  
 EXPNO 2  
 PROCNO 1  
 Date\_ 20210213  
 Time 13.46 h  
 INSTRUM spect  
 PROBHD Z108618\_0106 (  
 PULPROG zg30  
 TD 65536  
 SOLVENT CDCl3  
 NS 16  
 DS 2  
 SWH 8012.820 Hz  
 FIDRES 0.244532 Hz  
 AQ 4.0894966 sec  
 RG 203  
 DW 62.400 usec  
 DE 16.92 usec  
 TE 297.9 K  
 D1 1.00000000 sec  
 TD0 1  
 SFO1 400.1724710 MHz  
 NUC1 1H  
 P0 5.00 usec  
 P1 15.00 usec  
 SI 65536  
 SF 400.1700000 MHz  
 WDW EM  
 SSB 0  
 LB 0.30 Hz  
 GB 0  
 PC 1.00



20: C<sub>10</sub>H<sub>15</sub>NO  
 MW: 165.24

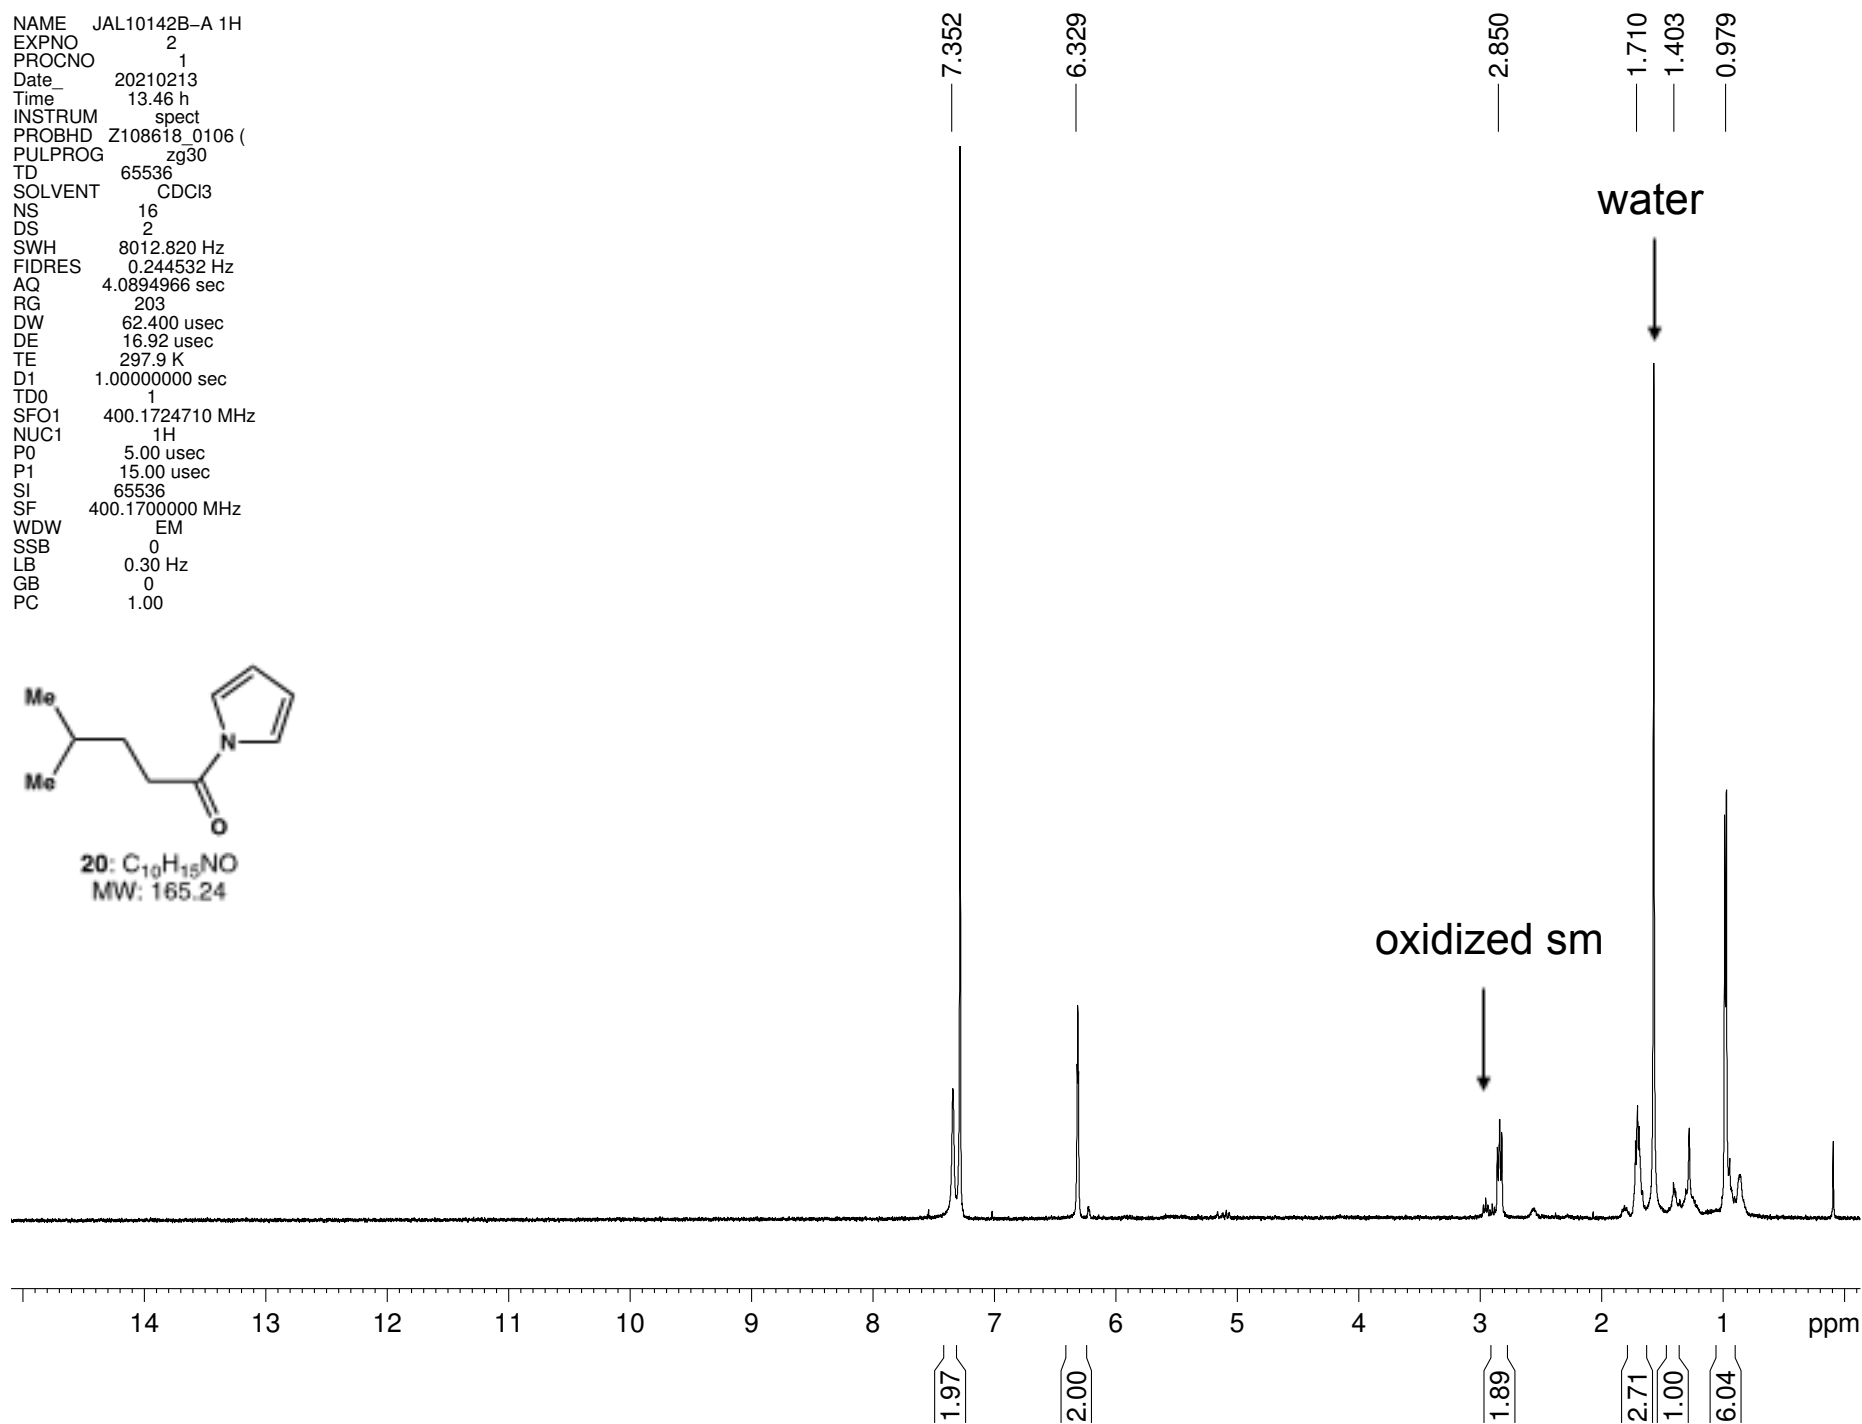

Supplement: NIHMS1704820-supplement-Supporting_Info.pdf [file NIHMS1704820-supplement-Supporting_Info.pdf]
